# Supplementary material for: Fine-Tuning Levels of Filamins A and B as a Specific Mechanism Sustaining Th2 Lymphocyte Functions
Source: Research Square preprint supplement (doi:10.21203/rs.3.rs-3878460/v1), 2024-03-15
Supplement: Supplementary file 1 [file 3c65188d1e56cb4a779f79a9.xlsx]

## Sheet: Protein sets
accession	#peptides	#specific_peptides	gene name	description	log2 abundance_KO1	log2 abundance_KO2	log2 abundance_KO3	log2 abundance_KO4	log2 abundance_KO5	log2 abundance_KO6	log2 abundance_KO7	log2 abundance_KO8	log2 abundance_KO9	log2 abundance_WT1	log2 abundance_WT2	log2 abundance_WT3	log2 abundance_WT4	log2 abundance_WT5	log2 abundance_WT6	log2 abundance_WT7	log2 abundance_WT8	log2 abundance_WT9	Difference	Student t-test p-value	test (Abs(difference)>0.5 AND p-val<0.01)	psm_count_KO1	psm_count_KO2	psm_count_KO3	psm_count_KO4	psm_count_KO5	psm_count_KO6	psm_count_KO7	psm_count_KO8	psm_count_KO9	psm_count_WT1	psm_count_WT2	psm_count_WT3	psm_count_WT4	psm_count_WT5	psm_count_WT6	psm_count_WT7	psm_count_WT8	psm_count_WT9	abundance_KO1	abundance_KO2	abundance_KO3	abundance_KO4	abundance_KO5	abundance_KO6
Q8K0L0	4	4	Asb2	Ankyrin repeat and SOCS box protein 2	8.62176	8.77863	7.5352	8.35652	8.97386	8.49541	8.77571	8.20972	7.89905	13.1944	9.11731	12.449	13.2028	14.3034	13.9887	14.6747	15.3891	14.3453	5.0021	6.24971e-07	1	0	0	1	0	0	0	0	0	1	3	1	2	3	4	3	4	4	3			185.49
P97801	4	4	Smn1	Survival motor neuron protein	10.0856	8.77863	8.68912	14.1368	10.7444	15.0667	8.44128	7.18636	8.61375	11.1103	16.3638	14.1125	11.88	15.6672	14.602	12.6917	14.3696	15.8719	3.88072	0.00259008	1	1	0	1	2	1	2	1	1	1	1	3	2	1	3	2	2	2	3	1086.57		412.75	18013.5	1715.53	34317.7
A2AA85	4	4	Szrd1	SUZ domain-containing protein 1	14.7511	14.5248	14.639	14.3577	14.4096	14.2306	12.1624	11.3136	12.373	15.5755	15.5786	15.4426	15.7332	16.0398	15.5675	14.3015	14.6172	14.5114	1.62284	0.00392363	1	4	4	3	3	3	3	2	2	2	3	3	4	4	3	3	2	2	3	27576.4	23571.8	25514.2	20993.5	21762.5	19223.9
O88878	4	2	Zfand5	AN1-type zinc finger protein 6	13.3896	13.16	12.9041	13.1167	12.7327	12.8962	10.8553	10.1928	11.4803	14.4607	13.0084	14.1174	14.1656	13.0515	13.589	12.9648	14.383	12.7927	1.31172	0.00963694	1	2	3	3	3	2	2	2	2	2	3	2	3	3	2	3	2	3	2	10731.8	9152.53	7665.35	8881.89	6806.41	7623.21
P62878	6	6	Rbx1	E3 ubiquitin-protein ligase RBX1	16.6818	16.6042	16.9743	16.8649	16.7111	16.8463	16.0327	15.769	15.6663	17.5876	17.1953	17.4683	17.5467	17.6723	17.5988	16.7631	16.7788	17.2044	0.851625	0.000697765	1	5	5	5	5	5	5	5	5	4	5	5	5	5	6	5	5	5	5	105129	99624.7	128759	119355	107286	117827
Q80X90	104	94	Flnb	Filamin-B	21.4287	21.439	21.0093	21.1701	20.7871	21.3296	20.5186	20.5178	20.5412	21.0074	20.4586	20.2565	20.9896	20.3656	19.7601	19.259	19.5851	20.1566	-0.767005	0.00523001	1	103	96	104	102	99	105	94	91	94	103	92	99	101	97	90	79	81	91	2.82279e+06	2.84309e+06	2.11071e+06	2.35958e+06	1.80942e+06	2.63541e+06
B7FAU9	114	105	Flna	Filamin-A	22.6997	22.7817	22.673	22.6352	22.6336	22.7788	23.0219	22.9418	23.1888	22.3323	21.7931	21.5212	22.276	21.8019	21.3382	22.1258	21.9941	22.1066	-0.896149	3.4333e-06	1	116	112	125	115	121	120	118	113	116	113	110	110	115	111	105	111	114	115	6.81241e+06	7210629	6687160	6.51447e+06	6507392	7.19606e+06
Q9Z2K1	19	10	Krt16	Keratin, type I cytoskeletal 16	16.4802	10.0026	16.2565	15.9191	13.4919	9.38847	15.6391	14.957	15.8029	15.8928	22.3947	13.2253	16.8013	15.0172	16.275	20.7151	16.7076	15.0659	2.6841	0.058965	0	13	2	12	10	7	3	12	9	10	11	23	6	12	8	12	18	12	9	91418.6	1025.86	78289.1	61962.5	11520.1	670.21
F7BFR0	3	3	Mier3	Mesoderm induction early response protein 3	13.9168	14.0681	7.48414	7.68783	13.3124	12.1576	7.95262	6.57788	12.1319	12.7514	13.5021	13.1202	13.0061	12.7452	13.3549	12.8209	12.9296	13.0095	2.43892	0.0314879	0	3	3	1	1	2	2	1	1	2	2	3	2	2	2	3	3	2	2	15466.4	17176	179.04	206.19	10172.6	4568.95
Q6IFX2	21	6	Krt42	Keratin, type I cytoskeletal 42	15.5049	8.77863	15.4775	15.2641	13.2961	13.3316	15.5568	14.7963	15.7082	14.3014	22.4865	13.8904	15.8791	14.0826	16.2203	19.9314	16.8392	15.4691	2.37619	0.0685601	0	11	0	10	11	6	7	10	10	10	8	25	7	12	7	13	17	13	9	46497.8		45623.2	39350.4	10058.3	10309.2
J3QN31	3	1	Adssl1	Adenylosuccinate synthetase isozyme 1	14.9806	12.5329	11.7195	14.3072	15.8121	15.7409	11.874	7.60874	9.19736	15.4755	15.4062	15.7251	15.9532	15.2705	16.0347	13.5624	13.4294	13.0939	2.24196	0.0462818	0	3	2	2	3	4	4	2	1	1	4	3	4	4	3	4	2	2	2	32329.4	5926.05	3372.28	20272.3	57531.1	54761.2
Q9CR25	5	5	Dph2	2-(3-amino-3-carboxypropyl)histidine synthase subunit 2	11.0808	9.40538	12.2835	12.3832	9.75967	12.8342	16.9243	16.6636	16.4963	15.0412	14.3703	16.0203	14.3588	14.3724	14.5256	16.4203	16.733	16.145	2.23957	0.0455493	0	2	1	2	2	1	2	5	5	4	3	3	4	3	3	3	4	5	4	2165.94	678.11	4985.53	5341.96	866.87	7302.5
Q61781	29	7	Krt14	Keratin, type I cytoskeletal 14	16.4177	11.1519	15.6988	15.8044	14.1653	13.5929	15.5721	14.3422	15.6489	15.3814	22.5006	13.9506	17.5686	14.4551	15.8033	20.9486	17.5311	14.1457	2.21011	0.0729011	0	14	4	12	13	9	8	14	11	13	12	33	8	18	9	14	23	20	9	87541.6	2275.47	53186.1	57226.3	18372.7	12355.9
Q9Z222	3	3	B3GNT2	N-acetyllactosaminide beta-1,3-N-acetylglucosaminyltransferase 2	8.15997	8.11452	12.231	8.0486	10.0212	9.16987	13.9072	12.2481	13.0804	12.8227	12.1605	12.0689	12.7789	13.1929	11.6673	13.1769	13.4451	13.4348	2.19633	0.0149979	0	1	1	2	1	1	1	2	2	2	2	2	2	2	2	2	2	2	3	286.02	277.15	4807.41	264.77	1039.19	575.98
Q8BGI5	4	4	Pex26	Peroxisome assembly protein 26	8.81506	7.77703	12.6903	7.01201	7.57758	9.52288	13.2959	13.5812	12.8684	11.5492	9.60509	12.9301	11.6308	12.6128	12.1421	13.7545	14.0212	14.317	2.15804	0.0532407	0	1	1	2	1	1	2	3	3	3	2	0	3	2	3	2	3	3	3	450.4	219.34	6609.57	129.07	191.02	735.65
P50446	34	9	Krt6a	Keratin, type II cytoskeletal 6A	16.6655	12.342	17.0562	16.9122	15.6943	15.6572	16.5681	15.8888	16.5575	16.4697	24.0533	15.6735	17.0428	15.988	17.0857	21.8802	18.023	16.2706	2.12722	0.0676355	0	17	6	18	16	12	14	16	15	14	16	37	12	17	16	19	30	22	16	103948	5191.65	136282	123332	53021.6	51676.8
Q9CZR3	4	4	Tomm40l	Mitochondrial import receptor subunit TOM40B	9.7968	9.9441	13.486	9.15788	9.88064	12.863	13.7104	14.0557	13.8864	12.6673	13.327	14.5572	14.3008	14.1615	14.0632	13.7408	14.5502	14.4352	2.11358	0.0105383	0	1	1	3	1	1	2	3	4	4	2	2	3	4	3	3	3	3	3	889.47	985.08	11473.1	571.21	942.69	7449.86
A0A2I3BRL3	3	3	Tinf2	TERF1-interacting nuclear factor 2	8.62176	8.77863	13.6366	9.13178	10.317	9.0063	15.3788	14.5847	14.6104	14.209	11.239	14.6188	14.2144	11.1847	11.2413	15.0011	15.0572	15.911	2.06784	0.0920414	0	0	0	2	1	1	1	3	3	2	2	1	2	2	1	1	3	3	2			12736	560.97	1275.64	514.24
Q3TNL8	5	5	Itprip	Inositol 1,4,5-trisphosphate receptor-interacting protein	13.7946	13.9679	8.36755	13.9847	14.479	14.2888	11.3658	6.75609	12.0532	14.6581	15.0732	14.6686	13.973	14.5804	14.4982	13.3741	13.1304	13.676	2.06385	0.048105	0	3	3	1	3	4	3	2	1	2	4	4	5	3	4	4	3	3	4	14209.4	16023	330.28	16211.7	22835.2	20014.4
Q9QUQ5	3	3	Trpc4	Short transient receptor potential channel 4	13.2437	10.3599	9.35056	12.858	14.4371	14.2303	7.97613	7.11333	8.01005	13.6052	14.8361	10.1968	14.7329	14.2355	14.1797	9.749	14.8182	9.68208	2.05071	0.115222	0	2	1	1	2	3	2	1	1	1	2	3	1	2	2	2	0	2	0	9699.24	1314.14	652.83	7424	22181.7	19220.2
Q9QWL7	30	10	Krt17	Keratin, type I cytoskeletal 17	16.0552	10.8017	16.5953	15.9822	13.478	13.5881	16.7504	15.171	16.574	13.9819	22.7699	13.0079	17.3356	14.8477	16.4445	21.294	18.0544	15.7084	2.04983	0.126954	0	12	2	14	12	6	8	16	12	15	7	33	6	15	9	13	25	22	12	68090.2	1785.02	99012.1	64731.4	11410.2	12314.8
P63024	4	4	Vamp3	Vesicle-associated membrane protein 3	16.1864	14.5288	16.2607	15.5462	16.1171	16.074	13.5428	7.94959	13.5579	17.2971	16.761	16.3524	16.4735	16.5985	16.4881	15.9688	15.8837	16.3779	2.04862	0.036739	0	3	2	4	3	3	3	2	1	2	4	3	3	3	3	3	2	2	2	74574.8	23638	78515.4	47850.3	71075.2	68984.4
Q8BUJ9	3	3	Lrp12	Low-density lipoprotein receptor-related protein 12	8.62176	8.77863	8.30366	8.35652	8.97386	8.49541	6.89845	6.58406	13.5822	9.08562	9.60509	9.19679	9.47488	9.52537	9.38718	14.1509	13.1491	12.833	1.97927	0.0537682	0	0	0	0	0	0	0	1	1	3	0	0	0	0	0	0	3	3	3
A0A087WSN5	4	4	Pigx	Phosphatidylinositol-glycan biosynthesis class X protein	14.6459	14.654	14.5208	14.3906	14.4034	11.8181	8.18992	6.75261	8.45488	14.906	13.6312	15.1664	14.7403	14.5238	14.1676	12.4991	12.3127	13.3811	1.94423	0.110153	0	3	4	3	3	3	2	1	1	1	4	2	4	4	3	3	2	2	3	25635.9	25780.5	23507.5	21478.7	21669.5	3610.71
E9Q1Z0	16	1	Krt90	Keratin 90	16.6143	12.9039	17.2504	17.5129	15.8749	15.8421	16.5425	16.0662	16.557	16.6049	23.1088	16.5116	17.0566	15.9949	16.8086	21.8244	18.1216	16.4821	1.92772	0.0644153	0	9	4	9	9	6	8	9	8	7	9	15	8	9	8	11	14	13	9	100323	7664.24	155920	187027	60091.2	58740.6
P19001	12	3	Krt19	Keratin, type I cytoskeletal 17	11.9267	9.70077	15.2833	12.4534	11.9812	11.2293	16.5457	15.3677	16.7285	12.4065	21.1162	11.6902	12.11	13.1874	14.3704	19.951	17.4719	16.2181	1.92279	0.201016	0	2	1	5	3	2	2	6	5	6	3	11	2	2	3	4	10	7	6	3893.1	832.19	39878.8	5608.55	4043.04	2400.72
Q3UV17	16	2	Krt76	Keratin, type II cytoskeletal 2 oral	16.2959	14.1065	17.0837	16.758	15.956	15.0642	16.0979	15.2891	15.8601	16.0495	23.4624	16.0109	16.3772	15.5878	16.5901	21.2473	17.6431	16.6586	1.90173	0.065266	0	8	5	8	7	7	6	7	6	6	7	14	6	8	7	10	12	10	10	80453	17638.8	138899	110827	63567.8	34259.7
A0A140LJF7	3	3	Ryr3	Ryanodine receptor 3	10.9376	10.9256	14.0794	10.7158	11.008	15.9158	8.77571	8.20972	9.12808	10.5976	15.4956	14.8703	15.2722	15.8566	15.8886	9.749	9.35492	9.68208	1.8968	0.164328	0	1	1	2	1	1	3	0	0	0	1	2	2	2	2	3	0	0	0	1961.31	1945.04	17311	1681.84	2059.34	61821.4
Q91WA1	3	3	Tipin	TIMELESS-interacting protein	11.9549	8.91289	8.51076	12.3883	12.0089	12.1672	9.2133	8.32427	13.4691	12.5479	13.3882	12.9738	9.69825	14.1957	12.9885	13.2434	10.7282	14.0834	1.87753	0.0381844	0	2	1	1	2	2	2	1	1	2	2	2	2	1	3	2	2	1	2	3969.93	482	364.75	5361.14	4121.24	4599.37
A0A5F8MPF3	3	3	Mical3	[F-actin]-monooxygenase MICAL3	9.30624	13.0879	14.0047	13.092	12.917	13.7273	9.21357	8.01011	9.31775	13.9842	13.7213	13.6029	13.764	13.5442	13.8955	12.9779	13.2365	10.7883	1.87092	0.0444557	0	1	2	3	2	2	3	1	1	1	3	2	3	2	3	2	2	2	1	633.08	8706.56	16437.1	8731.56	7734.17	13562.6
Q00420	4	4	Gabpb1	GA-binding protein subunit beta-1	14.8094	13.2168	12.6057	14.3013	15.5253	15.4192	8.65714	7.13945	12.7403	14.5563	15.2978	14.3467	13.5909	15.7805	15.8944	13.6497	13.9513	14.0168	1.8522	0.0907187	0	3	2	2	3	4	4	1	1	2	3	3	3	2	3	4	2	2	2	28712.8	9520.23	6233.13	20189.8	47161	43816.1
Q02257	9	9	Jup	Junction plakoglobin	10.1403	8.34988	10.1165	9.82319	8.4782	8.49541	11.4626	9.55612	13.147	8.24351	16.3306	9.19679	11.1401	8.39159	10.5365	16.2717	13.8162	11.5992	1.77299	0.146621	0	2	1	2	2	1	0	3	2	4	1	8	0	3	1	2	8	5	3	1128.62	326.26	1110.14	905.89	356.61
J3QMH1	3	1	Tiam1	T cell lymphoma invasion and metastasis 1 (Fragment)	11.8806	12.1029	14.845	14.8652	12.0197	14.3837	8.27044	10.8899	11.256	15.557	14.3381	15.7324	15.0166	13.0579	13.3656	12.7149	12.2084	14.119	1.73293	0.0534574	0	2	2	4	4	2	4	1	2	2	4	3	4	4	2	3	3	2	3	3770.67	4398.88	29429	29844.9	4152.19	21376.6
Q8C8M1	4	4	Sinhcaf	SIN3-HDAC complex-associated factor	10.6398	14.2035	14.7741	14.7764	9.5235	14.5741	8.09571	6.94685	8.55009	14.7174	14.9243	14.7762	14.5887	14.4515	14.6286	12.8499	7.91121	8.82305	1.73187	0.238546	0	2	3	4	4	1	3	1	1	1	4	4	4	4	3	4	2	1	1	1595.5	18865.7	28019.6	28063	735.97	24391.4
A2AHQ7	3	3	Phka2	Phosphorylase b kinase regulatory subunit alpha, liver isoform	8.63234	8.82212	9.01402	13.607	10.1162	13.6063	13.9124	14.7539	13.881	13.7647	14.9222	13.7969	9.47488	13.8102	14.2113	14.1725	13.7971	13.895	1.72216	0.106988	0	1	1	1	2	1	2	2	3	2	2	2	2	0	2	2	2	2	2	396.82	452.61	517	12477.4	1109.87	12471
D3YYL1	3	1	Bcl7b	B-cell CLL/lymphoma 7 protein family member C	8.62176	9.88501	13.4023	9.4154	10.0036	15.0892	15.4037	13.9913	14.3406	10.1597	10.6627	14.4065	14.2983	14.3952	14.425	15.3865	15.8108	16.1001	1.72131	0.152755	0	0	1	2	1	1	3	2	2	2	1	1	2	2	2	2	2	3	2		945.55	10826.6	682.84	1026.54	34857.9
P47915	5	5	Rpl29	60S ribosomal protein L29	18.8327	17.6977	19.0906	18.9609	19.3706	19.1989	10.1451	8.55922	10.2679	18.6816	19.5822	19.1627	18.7401	19.3458	19.3206	10.659	15.3364	16.5742	1.69767	0.368223	0	4	3	4	4	4	4	1	1	1	3	5	4	3	4	4	1	2	3	466883	212581	558260	510273	677835	601776
Q9EQS3	5	5	Mycbp	c-Myc-binding protein	8.63684	8.98823	13.8203	8.0427	11.85	8.26228	16.6036	15.9733	16.6974	12.9991	13.6416	12.6586	8.90439	12.4642	13.6284	15.8114	16.8819	17.0895	1.68937	0.280108	0	1	1	3	1	2	1	5	4	5	2	3	2	1	2	3	3	5	5	398.06	507.84	14465	263.69	3691.52	307.04
B1AQ77	11	2	Krt15	Keratin, type I cytoskeletal 17	15.4458	10.6996	17.4336	14.8668	13.7388	11.3173	16.8422	15.7448	16.6182	14.6915	20.45	13.9747	14.8024	13.7548	14.897	20.9026	18.0464	16.2175	1.66998	0.18727	0	6	2	7	5	4	3	8	7	8	5	11	4	5	4	6	10	9	7	44632.5	1663.05	177032	29878.5	13671	2551.85
Q9JIG8	3	1	Praf2	PRA1 family protein 2	10.354	12.7094	12.3635	13.1493	11.0531	10.7009	13.8066	7.8653	12.982	13.0736	14.0901	11.7661	13.7658	11.6543	14.1855	12.2818	14.2837	14.832	1.66097	0.0375933	0	1	2	2	2	1	1	2	1	2	2	2	1	2	1	2	1	2	2	1308.78	6697.56	5269.69	9085.38	2124.85	1664.52
E9Q0F0	4	2	Krt78	Keratin 78	18.2228	15.5805	19.5858	17.1487	18.1134	17.6378	16.8569	15.0301	16.0601	18.605	21.9842	18.8228	18.858	18.628	19.9688	18.0056	16.7016	17.5141	1.65022	0.0303575	0	4	2	4	3	4	4	3	2	2	4	6	4	4	4	6	3	2	3	305930	48999	786889	145301	283590	203940
Q7TN02	4	4	Med26	Mediator of RNA polymerase II transcription subunit 26	11.3729	8.70977	13.9988	13.5265	9.93659	7.76964	14.109	13.9335	13.8921	13.6	12.6221	13.5833	13.791	12.1968	13.2134	14.4427	14.0822	14.4924	1.64167	0.0817335	0	2	1	4	3	1	1	4	4	4	3	2	3	3	2	3	4	3	4	2652	418.7	16370.2	11799.7	979.97	218.22
A2AKB9	3	3	Dcaf10	DDB1- and CUL4-associated factor 10	8.94483	12.8129	12.2466	12.1948	9.36392	12.4499	11.4937	7.8448	11.7015	12.9094	12.9636	12.743	12.9799	12.7467	12.8204	12.2741	12.0561	12.2301	1.63006	0.0169679	0	1	2	2	2	1	2	2	1	2	2	2	2	2	2	2	2	2	2	492.79	7195.82	4859.41	4688.17	658.9	5594.8
Q6P6L5	3	3	Mybpc1	Myosin binding protein C, slow-type	13.0923	8.77863	13.0589	13.2909	13.1118	8.49541	12.6167	8.20972	10.1724	12.9257	13.7154	13.6201	13.0954	12.8956	13.7897	11.6919	11.9634	11.6924	1.61809	0.059954	0	2	0	2	2	2	0	2	0	1	2	2	2	2	2	2	1	1	1	8733.19		8533.31	10022	8852.29
A0A0A0MQE0	6	6	Pou2f1	POU domain, class 2, transcription factor 1	9.66649	11.3326	15.4055	14.3135	11.3676	9.18903	15.6997	15.1243	15.1673	13.4668	13.1902	14.9104	13.4173	13.1672	14.5161	16.3995	16.5602	16.0482	1.6011	0.126632	0	1	2	6	4	2	1	5	4	4	3	3	5	3	3	4	6	6	5	812.65	2579.07	43403.6	20360.1	2642.29	583.68
P61079	3	2	Ube2d3	Ubiquitin-conjugating enzyme E2 D3	18.041	11.8345	17.941	17.5745	18.4303	18.6015	10.2941	9.02694	9.82945	18.0205	18.3732	17.5865	17.7324	18.6375	18.3195	10.8215	16.2424	10.2153	1.59728	0.384759	0	3	1	3	3	3	3	1	1	1	3	3	3	3	3	3	1	2	1	269706	3652.09	251634	195189	353238	397753
G5E889	3	3	Mto1	Protein MTO1 homolog, mitochondrial	12.9824	8.76709	13.8633	7.81762	8.59738	13.7259	13.5897	13.5017	13.523	13.2522	13.5574	13.7654	13.3479	13.1419	13.6908	13.5807	13.1307	13.1618	1.58453	0.0866307	0	2	1	3	1	1	3	3	3	3	2	2	3	3	2	3	3	3	3	8092.42	435.67	14903	225.6	387.32	13548.9
P20334	3	3	Tnfrsf9	Tumor necrosis factor receptor superfamily member 9	13.6395	10.9194	9.18564	15.5935	11.0497	14.8259	15.2762	15.9718	16.3722	11.9149	12.5599	16.4317	15.6994	13.3962	15.912	16.3233	17.3641	17.4185	1.57623	0.175234	0	2	1	1	2	1	2	2	2	2	1	1	2	2	1	2	2	2	3	12761.7	1936.75	582.31	49444.1	2119.76	29043.7
Q3TFQ1	3	3	Spryd7	SPRY domain-containing protein 7	8.78185	9.02306	8.04456	14.1403	13.7673	14.1013	14.3423	14.4355	14.457	13.0254	13.9303	13.756	13.7374	14.2947	14.053	14.5435	14.1036	13.7337	1.56492	0.118655	0	1	1	1	2	2	3	3	3	3	2	2	2	3	2	2	3	3	3	440.15	520.25	264.03	18057.5	13943.7	17576.2
P21278	3	2	Gna11	Guanine nucleotide-binding protein subunit alpha-11	10.5625	10.695	9.86239	14.6548	15.0251	15.2245	15.4047	14.6775	14.8803	14.6099	15.1425	15.0046	15.0894	14.9164	14.8956	15.4188	14.8623	15.1288	1.56463	0.0616955	0	1	1	1	3	2	3	2	3	3	2	3	3	3	3	3	3	3	3	1512.22	1657.75	930.84	25795.5	33343.6	38285.9
E9PZJ2	4	4	Irf9	Interferon regulatory factor 9	8.46352	8.77863	13.596	9.33878	10.0154	8.49541	14.2894	13.87	13.4841	13.8827	12.8652	12.2481	9.47488	12.342	9.86763	12.9892	14.9289	15.7179	1.55393	0.177759	0	1	0	3	1	1	0	3	3	3	4	2	2	0	2	1	2	4	4	353		12382.5	647.52	1034.97
Q91ZU1	5	5	Asb6	Ankyrin repeat and SOCS box protein 6	9.00006	10.8302	10.5624	10.4066	13.2671	14.7955	14.2693	14.9871	15.2871	14.4562	13.3871	10.9472	14.5336	14.7031	14.2789	15.2532	15.2619	14.5189	1.5483	0.109286	0	1	2	2	2	3	4	4	5	5	4	3	2	4	4	4	5	5	4	512.02	1820.64	1512.18	1357.36	9858.33	28436.5
Q9R1Q7	3	3	Plp2	Proteolipid protein 2	18.693	14.7585	18.1307	18.7219	18.5403	18.5338	13.6707	12.1254	17.0592	18.9258	18.2469	18.7502	17.8757	18.6203	18.5429	17.9009	18.1949	17.0973	1.54682	0.0913267	0	3	1	3	3	3	3	1	1	3	3	3	3	3	3	3	3	3	3	423794	27716.5	287003	432364	381232	379527
Q8BJD1	4	4	Itih5	Inter-alpha-trypsin inhibitor heavy chain H5	13.352	10.9511	13.2776	13.8415	13.9037	13.8405	7.2971	10.6625	12.7119	13.9951	13.1211	14.0243	13.8303	13.2686	14.1407	12.5938	14.2255	14.5443	1.54508	0.0604336	0	3	2	3	4	4	4	1	2	3	3	3	4	3	3	4	2	4	4	10455.9	1979.71	9930.27	14679.6	15326.5	14669.2
A0A087WRY3	4	4	Nucks1	Nuclear ubiquitous casein and cyclin-dependent kinase substrate 1	15.3745	13.9333	15.1467	15.1934	14.7427	15.684	12.09	11.3291	12.2303	10.3679	17.1525	16.5046	16.2726	17.3147	17.0056	14.0406	14.8637	16.082	1.54225	0.113349	0	3	3	4	3	3	3	2	2	2	1	3	4	3	4	3	2	3	4	42479.8	15643.4	36275.9	37469.3	27415.5	52644.2
Q9D0L7	4	4	Armc10	Armadillo repeat-containing protein 10	9.86821	14.1217	14.9105	7.68678	14.8677	14.2515	15.1007	14.2873	14.4248	14.6293	14.9117	14.9488	14.5581	14.5883	14.8616	14.8562	15.0104	14.9758	1.53569	0.0998215	0	2	3	3	1	4	3	3	3	3	3	4	4	4	3	4	3	3	3	934.6	17826.6	30797	206.04	29896.5	19503.9
Q9CXE2	3	1	Bcl7a	B-cell CLL/lymphoma 7 protein family member A	8.40446	13.756	14.4235	13.8619	13.9456	14.6157	10.1611	14.3633	14.7067	14.2375	14.2137	14.6303	14.4309	14.5954	14.4609	14.2353	15.275	15.9125	1.52813	0.0661277	0	1	2	3	2	2	3	1	2	2	2	2	3	3	3	3	2	2	3	338.84	13835	21973.7	14888.4	15777.6	25105.8
Q9QXV1	3	3	Cbx8	Chromobox protein homolog 8	9.74123	9.95616	9.2124	9.3262	9.84761	14.0257	14.2418	14.9524	15.1373	14.6018	13.9668	10.4175	14.0874	10.5584	10.7816	15.0718	15.2712	15.4358	1.52795	0.196962	0	1	1	1	1	1	2	2	3	3	2	2	1	2	1	1	2	3	3	855.86	993.35	593.21	641.9	921.35	16678
A6PW28	3	3	Ripor2	Rho family-interacting cell polarization regulator 2	13.5117	14.0826	9.1769	14.384	10.1464	14.2341	10.1234	13.5317	9.91151	14.5132	14.7164	10.1278	15.2829	14.1301	14.762	10.5978	14.2182	14.3256	1.50795	0.138413	0	2	2	1	3	1	2	1	2	1	3	2	1	2	3	2	1	2	2	11680	17349.5	578.79	21379.8	1133.39	19269.9
P07744	11	2	Krt4	Keratin, type II cytoskeletal 5	16.0816	14.8448	16.7161	16.8538	15.8631	15.7153	15.5952	15.559	15.7921	15.9624	23.2475	16.1995	16.1064	15.4277	16.4746	20.8377	16.7988	14.8885	1.4358	0.151829	0	5	4	6	5	5	6	5	5	4	5	9	5	5	5	7	7	6	5	69348.6	29425.2	107658	118442	59604.7	53800.4
O70362	4	4	Gpld1	Phosphatidylinositol-glycan-specific phospholipase D	13.9515	8.71129	14.2192	13.1641	12.7378	14.4623	14.123	14.273	12.944	14.4416	13.5414	14.1559	13.4753	14.3032	13.949	15.9086	16.502	15.1532	1.42714	0.0554901	0	3	1	3	2	2	3	3	3	2	3	2	3	2	3	3	4	4	3	15842.2	419.14	19072.2	9178.72	6830.75	22572.3
Q9D5R3	3	3	Cep83	Centrosomal protein of 83 kDa	8.70663	8.70594	11.8425	8.35652	9.38575	8.49541	13.788	6.67129	12.5845	9.25838	9.49849	9.42118	8.8849	9.52537	13.0925	13.87	13.9831	13.8443	1.42685	0.213577	0	1	1	2	0	1	0	3	1	2	1	1	1	1	0	2	3	3	3	417.79	417.59	3672.41		668.95
A2AUY4	3	3	Baz2b	Bromodomain adjacent to zinc finger domain protein 2B	8.62176	15.7795	8.30366	8.35652	13.1391	16.1133	16.5915	14.3017	16.8984	9.08562	15.902	14.7099	14.568	14.5747	15.4666	15.6056	15.5045	15.4787	1.42113	0.332049	0	0	2	0	0	1	2	2	1	2	0	1	1	1	1	1	1	1	1		56246.5			9021.36	70889.2
D3Z6W1	10	10	Map6	Microtubule-associated protein 6	10.5012	12.4711	12.3786	12.4423	14.0081	14.4735	16.3822	15.2535	17.1866	15.2982	13.8272	14.4604	14.4302	14.4707	14.1443	17.3197	17.0105	16.8988	1.41812	0.115851	0	3	4	4	4	7	7	10	8	10	8	6	6	7	6	6	10	10	9	1449.4	5677.85	5325.02	5565.68	16475.8	22748
Q8C2A2	5	5	Tsen54	tRNA-splicing endonuclease subunit Sen54	10.7864	10.9825	10.693	7.94181	10.9637	7.92772	14.887	12.874	13.8549	11.6553	9.73997	11.671	10.5583	12.6821	11.5175	15.5162	15.1499	15.1051	1.40938	0.204823	0	2	2	2	1	2	1	4	3	4	2	1	2	2	3	2	5	4	4	1766.12	2023.29	1655.47	245.88	1997.08	243.49
H3BJF3	3	1	Nsun2	RNA cytosine C(5)-methyltransferase NSUN2	10.7018	15.3565	14.9846	10.6731	14.4619	15.6384	15.6595	14.824	15.518	15.3466	17.011	16.8146	12.467	12.5618	15.4543	16.4668	16.8363	17.4398	1.39783	0.149254	0	1	2	2	1	2	2	2	2	2	2	3	3	1	1	2	3	2	2	1665.53	41954.6	32420.7	1632.78	22566.4	51008.4
O70456	8	7	Sfn	14-3-3 protein sigma	10.1099	12.5655	10.1292	7.58489	10.6259	10.1801	14.6762	7.44791	13.5853	8.50128	16.7829	8.21553	11.4658	8.70719	11.6452	17.1796	14.0027	12.8498	1.38279	0.33756	0	2	3	2	1	2	2	4	1	3	1	5	1	2	1	2	7	3	2	1105.05	6061.74	1119.95	191.99	1580.23	1160.12
Q76KJ5	7	7	Polr1g	DNA-directed RNA polymerase I subunit RPA34	10.0718	10.5034	15.4891	12.3873	14.6886	14.8364	16.0209	15.5637	15.7665	15.795	14.7414	15.6157	14.6818	14.5333	14.4433	15.7463	15.8994	16.292	1.38004	0.107466	0	2	2	6	3	4	5	6	7	6	7	4	6	4	4	4	6	6	7	1076.25	1451.62	45992	5357.37	26406.3	29255.6
Q8VIG1	3	3	Rest	RE1-silencing transcription factor	8.68036	11.2603	7.4614	8.35652	8.97386	8.49541	11.2275	11.5553	11.4194	12.062	9.50353	10.9646	10.903	11.6016	8.76845	11.7416	12.0959	11.9712	1.35354	0.0606085	0	1	2	1	0	0	0	2	3	2	3	1	2	2	3	1	2	3	2	410.25	2452.94	176.24
E9PZS8	4	4	Cox7a2l	Cytochrome c oxidase subunit 7A-related protein, mitochondrial	9.12171	9.25283	14.3103	12.143	9.15712	12.4475	16.2713	15.2108	15.3473	14.879	9.5875	14.0307	12.673	12.7218	13.6515	15.3167	16.2436	16.3045	1.34962	0.273428	0	1	1	3	2	1	2	4	3	3	3	1	3	2	2	3	4	4	4	557.07	610.07	20316.2	4522.65	570.91	5585.59
P27782	3	3	Lef1	Lymphoid enhancer-binding factor 1	8.62176	8.77975	13.3617	8.09735	12.8722	13.7214	15.3412	15.365	14.7676	12.8703	12.8993	13.2707	13.311	12.8466	12.759	14.7099	15.3753	14.9861	1.34445	0.221828	0	0	1	2	1	2	2	3	3	3	2	2	2	2	2	2	2	2	3		439.51	10526.4	273.87	7497.51	13506.4
Q922U2	31	12	Krt5	Keratin, type II cytoskeletal 5	17.063	14.2826	19.0366	17.393	16.2624	15.3694	17.14	16.624	17.629	16.4389	23.6201	16.6424	16.5705	16.1499	16.5667	21.6705	18.3155	16.8865	1.34011	0.201962	0	13	7	22	13	10	10	15	15	17	12	30	12	10	12	13	25	18	15	136926	19929.7	537763	172109	78608.8	42329.8
Q8VIJ8	3	3	Nprl3	GATOR complex protein NPRL3	12.215	12.3449	13.3873	7.93893	13.0322	8.05007	12.7715	13.049	12.6666	13.5248	12.5289	12.5359	13.6045	13.6544	13.0521	13.1347	12.7151	12.7378	1.33695	0.0855405	0	2	2	3	1	2	1	2	3	2	3	2	2	3	3	2	2	2	2	4754.34	5202.32	10714.7	245.39	8376.71	265.04
A0A1L1SSV8	3	2	Taok2	Serine/threonine-protein kinase TAO2	11.3279	11.8355	9.32245	9.66935	12.072	11.9723	14.0429	7.19712	12.1473	12.1701	12.5476	11.6057	11.8689	10.8611	12.0518	12.3373	14.9194	13.2492	1.33601	0.103214	0	2	2	1	1	2	2	3	1	2	2	2	2	2	1	2	3	4	2	2570.62	3654.57	640.23	814.26	4305.61	4018.24
Q8K3Q3	3	2	Foxn4	Forkhead box protein N4	14.6599	8.77863	8.30366	9.66115	13.6948	13.3209	9.56826	14.108	13.7399	10.4277	14.5462	11.2579	10.8497	14.9216	15.2691	13.9966	14.9018	11.6812	1.33518	0.23911	0	3	0	0	1	2	2	1	2	2	1	2	1	1	2	2	2	2	1	25885.4			809.65	13259.9	10232.8
Q3UDR8	3	3	Yipf3	Protein YIPF3	8.62176	8.54164	12.8765	7.6153	12.9411	8.49541	14.3	13.6415	14.1917	12.4596	9.72853	12.5915	13.2699	9.36816	13.1983	14.0518	13.9797	14.5044	1.3252	0.256654	0	0	1	2	1	2	0	3	3	3	2	1	2	3	1	3	3	3	3		372.64	7520	196.08	7864.36
Q922B6	6	6	Traf7	E3 ubiquitin-protein ligase TRAF7	12.2204	12.3882	9.77228	10.0914	10.5301	14.1442	15.1152	15.066	15.3704	14.0427	13.0209	13.9209	13.818	12.5837	13.8398	14.3989	15.6011	15.3817	1.32328	0.127042	0	3	3	2	2	2	5	5	6	6	4	3	4	4	3	4	5	6	6	4771.96	5360.66	874.48	1090.96	1478.7	18105.8
E9Q5Y1	4	3	Clk2	Dual specificity protein kinase CLK1	11.2761	11.3877	13.7025	8.5656	9.18143	13.5258	14.0003	14.173	14.1446	13.5802	12.3843	13.3384	13.1175	13.2899	13.4003	14.2847	14.2325	14.2027	1.31926	0.102884	0	2	2	3	1	1	3	4	4	4	3	2	3	3	3	3	4	4	3	2479.99	2679.45	13330.7	378.88	580.61	11794.4
A0A494B946	4	4	Btbd9	BTB/POZ domain-containing protein 9	8.2134	8.77863	12.2291	7.74665	11.2434	12.7509	13.0139	13.0265	13.12	12.3757	12.1402	12.3561	11.452	11.1899	11.7813	13.8622	13.63	13.1346	1.31106	0.125787	0	1	0	3	1	2	3	4	4	3	3	3	3	2	2	2	4	4	3	296.81		4800.93	214.77	2424.46	6892.96
Q9CQA1	4	4	Trappc5	Trafficking protein particle complex subunit 5	11.0619	10.5252	10.5222	10.4872	11.1052	12.8746	10.8258	14.277	14.0783	11.2773	11.5278	11.2579	11.3932	11.2465	12.6482	15.8716	16.2559	15.9514	1.29692	0.177649	0	2	2	2	2	2	3	2	4	4	2	2	2	2	2	3	4	4	4	2137.79	1473.7	1470.65	1435.37	2202.88	7510
P27931	5	5	Il1r2	Interleukin-1 receptor type 2	10.904	14.4452	14.552	15.168	14.8334	15.2137	13.7373	10.0245	7.82101	14.4521	15.2738	15.4547	14.6632	15.4476	15.1171	8.34837	13.621	15.948	1.29186	0.291696	0	2	3	4	4	4	5	3	2	1	3	5	5	3	4	4	1	3	4	1916.15	22307	24020.3	36815.8	29194.4	38000.9
Q3U7K7	3	3	Trim21	E3 ubiquitin-protein ligase TRIM21	14.0962	14.3125	13.7429	14.1481	14.0634	9.85627	14.2439	13.976	10.3129	14.7102	14.6766	14.6305	14.5972	14.4023	14.5313	14.2282	14.3017	14.2884	1.29048	0.0453797	0	2	2	2	2	2	1	2	2	1	2	2	2	2	2	2	2	2	3	17513.7	20346	13709.2	18155.4	17120.5	926.9
Q80XP8	4	3	Fam76b	Protein FAM76B	15.3969	15.6372	14.8144	14.8577	15.4362	15.2966	12.4857	11.8112	12.5655	16.2543	16.0193	16.1442	16.2651	16.1704	16.1362	14.2609	14.402	14.2329	1.2871	0.0454851	0	3	3	2	2	3	3	2	2	2	3	3	3	3	3	3	2	2	2	43145.6	50965.9	28811.7	29691.1	44337	40246.8
Q9CZ96	3	3	Zcrb1	Zinc finger CCHC-type and RNA-binding motif-containing protein 1	13.4056	13.4776	13.3779	13.7144	13.6051	13.4235	10.2424	9.92576	10.7503	14.3822	14.3167	16.1581	14.5855	15.3091	14.5195	11.2228	11.3642	11.6203	1.28398	0.134214	0	2	2	2	2	2	2	1	1	1	2	2	3	2	3	2	1	1	1	10851.5	11407	10644.9	13441.6	12460.4	10987
Q8VED5	12	1	Krt79	Keratin, type II cytoskeletal 79	17.6382	13.2738	18.7537	18.0368	17.1102	16.7356	16.8171	16.6059	17.4137	16.7427	23.2702	17.2735	17.4978	17.3641	17.6949	18.9805	17.9487	17.141	1.28093	0.146681	0	8	3	8	9	6	7	6	7	6	6	12	7	6	8	10	6	8	7	204004	9903.72	442016	268913	141480	109126
A0A0R3P9C4	3	3	Smim4	Small integral membrane protein 4	12.5795	10.3438	9.4869	9.50865	13.0929	9.54481	13.336	13.1438	13.8641	10.6527	14.295	13.4748	10.7413	13.7297	13.8859	11.2829	14.5605	13.7848	1.27859	0.137366	0	2	1	1	1	2	1	2	2	2	1	2	2	1	2	2	1	3	2	6120.82	1299.54	717.53	728.43	8736.86	746.92
Q9JKN1	3	3	Slc30a7	Zinc transporter 7	9.262	9.49071	14.2627	14.1821	14.2872	13.9878	15.416	14.7125	14.4366	13.9521	14.1065	14.0439	14.1671	14.4581	14.4738	15.1386	15.3586	15.8284	1.27661	0.127026	0	1	1	2	2	2	2	3	3	2	2	2	2	2	2	2	2	3	2	613.96	719.43	19656.6	18588.1	19992.7	16245.9
Q9Z1Q2	4	4	Abhd16a	Phosphatidylserine lipase ABHD16A	8.79344	9.06283	11.9417	12.2577	13.0822	12.1317	14.9387	14.7559	14.8202	12.5447	12.8199	12.7593	12.7116	12.7255	13.2462	15.5253	15.4033	15.4454	1.2663	0.174474	0	1	1	2	2	3	2	4	4	4	2	2	3	2	2	3	4	4	4	443.7	534.79	3933.7	4897.2	8672.6	4487.48
P01027	4	4	C3	Complement C3	12.5332	8.96821	11.7754	13.6902	14.6718	15.2896	14.168	11.7037	11.2091	13.434	13.4278	15.5653	13.4768	15.8714	15.9239	12.768	12.3613	12.4868	1.25623	0.146407	0	2	1	2	3	3	4	3	2	2	3	2	4	2	4	4	2	2	2	5927.4	500.84	3505.46	13217.9	26100.6	40053.1
Q05117	4	4	Acp5	Tartrate-resistant acid phosphatase type 5	9.03963	11.1828	8.32526	10.8067	11.0966	8.78038	14.7439	14.4058	13.8564	11.6093	9.66288	11.2375	12.7206	12.3298	11.4322	14.7071	14.589	15.208	1.25098	0.243172	0	1	2	1	2	2	1	4	4	4	2	1	2	3	3	2	4	4	4	526.26	2324.65	320.74	1791.17	2189.8	439.7
A0A1D5RMI8	3	3	Alms1	Centrosome-associated protein ALMS1	11.9388	12.0189	13.0122	8.67585	9.08584	8.71562	11.2792	7.61235	11.5167	12.3854	12.6631	9.45927	12.6453	13.1355	9.84334	9.58978	12.7843	12.6014	1.2502	0.146782	0	2	2	3	1	1	1	2	1	2	2	2	1	2	2	1	1	2	2	3925.92	4150.05	8261.5	408.97	543.39	420.4
Q3TLP5	3	3	Echdc2	Enoyl-CoA hydratase domain-containing protein 2, mitochondrial	11.8085	11.9931	10.9628	8.35652	14.7996	11.1404	14.663	14.6925	14.4167	14.204	11.4939	10.5686	14.4512	15.4311	14.132	14.4164	14.6771	14.6644	1.24508	0.196907	0	1	1	1	0	3	1	2	3	2	2	1	1	2	2	2	3	3	3	3586.84	4076.41	1995.84		28518.1	2257.26
P20109	3	3	Il13	Interleukin-13	8.62176	8.77863	8.30366	8.89924	8.97386	8.49541	8.3539	12.5379	14.8902	9.08562	9.11598	9.25998	9.47488	9.52537	9.38718	14.8884	14.3181	13.9906	1.2435	0.296927	0	0	0	0	1	0	0	1	2	3	0	1	1	0	0	0	3	3	2				477.46
Q9DCF9	3	3	Ssr3	Translocon-associated protein subunit gamma	12.6009	10.244	13.1261	12.7526	12.9479	12.6691	10.8111	11.8516	10.7878	13.572	13.6548	13.6035	13.5416	13.9028	13.9379	12.0473	12.1781	12.5329	1.24221	0.0124055	0	2	1	2	2	2	2	1	2	1	2	3	2	2	2	2	1	1	1	6212.17	1212.69	8940.29	6901.1	7901.25	6512.84
Q9D1M7	3	3	Fkbp11	Peptidyl-prolyl cis-trans isomerase FKBP11	10.9976	11.1292	14.9582	13.5098	13.2742	12.8357	15.2637	9.91274	14.6796	14.078	14.4274	14.4616	14.5483	14.1306	14.5292	13.8002	14.693	13.0536	1.24012	0.0780879	0	1	1	3	2	2	2	3	1	3	2	2	2	2	2	3	2	2	1	2044.65	2239.92	31832.7	11663.9	9906.76	7310.19
A0A0R4J055	4	4	Dnmbp	Dynamin-binding protein	8.43417	11.1383	13.3319	8.0387	11.82	10.9506	12.5888	13.0031	12.5922	11.1026	12.6125	13.4686	12.056	11.5378	11.8006	12.6288	13.5717	14.2577	1.23762	0.109346	0	1	2	4	1	2	2	3	3	3	2	3	3	2	2	2	3	4	4	345.89	2254.03	10311.2	262.96	3615.59	1979.03
B1AUB9	4	3	Nfia	Nuclear factor 1 A-type	12.6274	12.7981	14.8836	8.05756	15.0695	14.4906	13.6873	12.6564	13.8728	11.626	14.6604	15.8339	12.3548	14.9046	15.7943	13.1948	14.8747	16.0309	1.23681	0.181339	0	2	2	4	1	4	3	3	2	3	2	3	4	2	3	4	2	3	4	6327.23	7122.18	30228.3	266.42	34384.6	23019.2
A0A087WNR7	3	3	Rbis	Ribosomal biogenesis factor	8.779	13.4921	12.6346	12.6545	9.53465	13.137	8.5091	12.5357	14.1376	13.3186	13.159	12.1348	13.1975	12.8947	10.475	13.7436	14.0012	13.5277	1.22643	0.145307	0	1	2	2	2	1	2	1	2	3	2	2	2	2	2	1	2	3	3	439.28	11522.3	6358.97	6447.36	741.68	9007.82
O55055	3	3	Trdmt1	tRNA (cytosine(38)-C(5))-methyltransferase	9.10423	9.21861	12.2529	12.8911	9.3537	9.13679	13.3511	12.9522	13.6137	13.0791	13.1004	13.3859	12.8137	9.81317	10.0431	13.5692	13.9952	13.1088	1.22603	0.168067	0	1	1	2	2	1	1	3	3	3	2	2	2	2	1	1	3	3	3	550.36	595.77	4880.79	7596.48	654.25	562.92
Q810Q5	4	4	Nmes1	Normal mucosa of esophagus-specific gene 1 protein	10.4781	10.7843	13.4676	10.5214	10.6715	10.4022	16.9239	15.9724	16.273	13.5731	11.198	13.8153	14.3708	14.3741	11.2586	16.7095	15.7798	15.4396	1.22493	0.296878	0	1	1	2	1	1	1	4	3	4	2	1	2	3	3	1	3	4	2	1426.36	1763.55	11327.6	1469.79	1630.91	1353.23
Q6IME9	11	3	Krt72	Keratin, type II cytoskeletal 72	14.087	11.4295	15.606	15.1395	14.1164	13.6806	14.1285	12.1991	14.1757	12.1369	20.0599	13.2896	14.2822	14.3641	13.6403	18.3061	15.4595	14.0475	1.22488	0.216256	0	6	3	6	7	6	5	6	4	5	3	9	4	5	5	4	10	8	5	17402.2	2758.13	49873.7	36093.8	17761.2	13129.8
Q9CQV7	4	4	Dnajc19	Mitochondrial import inner membrane translocase subunit TIM14	14.235	9.82633	12.9914	12.9389	15.0609	13.9003	7.80387	6.92636	8.22877	15.3883	15.0077	14.0905	14.5395	15.1252	14.9235	8.53737	7.30716	7.91678	1.2138	0.448568	0	3	1	2	2	3	3	1	1	1	4	3	3	4	4	3	1	1	1	19282.2	907.86	8143.32	7852.18	34180	15289.7
Q920F6	3	3	Smc1b	Structural maintenance of chromosomes protein 1B	11.9414	11.61	11.6508	8.35652	11.9347	11.9051	11.9686	11.6783	11.8861	9.08562	11.9737	11.7682	12.0053	11.7667	15.887	11.9839	11.9272	17.3749	1.20457	0.2046	0	1	1	1	0	1	1	1	1	1	0	1	1	1	1	2	1	1	2	3932.89	3125.83	3215.39		3914.81	3835.32
Q6P7W5	3	3	Tsen2	tRNA-splicing endonuclease subunit Sen2	13.4899	8.87572	13.4914	13.3817	13.2691	13.5737	12.6782	7.96751	13.0252	13.4129	14.1775	13.463	13.4738	14.118	13.8268	12.9351	13.1303	12.0392	1.20269	0.130913	0	2	1	2	2	2	2	2	1	2	2	2	2	2	2	2	2	2	1	11504.2	469.74	11516.2	10673.1	9871.5	12192.3
Q7TN22	3	3	Txndc16	Thioredoxin domain-containing protein 16	11.6764	9.37317	13.7822	12.236	9.37684	9.12013	11.2617	7.92955	8.65485	13.1452	9.77325	9.54888	13.4798	13.3062	13.0885	9.749	9.58922	12.543	1.20134	0.195795	0	2	1	3	2	1	1	2	1	1	2	1	1	2	2	2	0	1	2	3273.04	663.14	14088.1	4824.11	664.83	556.46
Q9CZX9	5	5	Emc4	ER membrane protein complex subunit 4	12.4853	12.6909	14.5832	8.35652	15.2815	15.3509	14.3863	15.201	15.2306	14.7043	15.5307	15.3723	15.6096	14.6429	15.458	12.4224	15.142	15.479	1.19944	0.170046	0	2	2	3	0	4	4	3	3	3	3	4	5	5	3	4	2	3	3	5733.78	6612.03	24545.3		39827.3	41790.8
A0A087WPA7	4	3	Myb	Transcriptional activator Myb	14.8643	15.1837	8.20897	14.6688	14.2549	14.1718	7.74866	6.25399	12.3523	14.6876	14.5551	8.51602	15.0434	13.3676	13.8394	12.0917	12.713	13.5819	1.18759	0.393868	0	3	3	1	4	3	3	1	1	2	3	3	1	4	2	2	2	2	3	29826.6	37217.5	295.9	26045.7	19550.1	18455.8
A0A1B0GR49	4	4	Sult2b1	Sulfotransferase 2B1	8.62176	8.77863	8.30366	9.26817	8.97386	7.79279	9.9062	8.39673	12.5577	8.98843	9.60509	9.19679	7.71809	9.52537	9.38718	13.6109	12.7931	12.4409	1.18515	0.170136	0	0	0	0	1	0	1	2	1	3	1	0	0	1	0	0	3	3	3				616.59		221.75
Q05921	12	12	Rnasel	2-5A-dependent ribonuclease	11.8139	12.0794	15.5931	14.6907	14.5957	12.1626	16.9454	16.1855	16.1194	14.4802	15.1328	15.7227	15.45	15.0873	15.0962	16.3743	16.3915	17.1143	1.18485	0.116623	0	4	4	7	7	6	4	10	9	9	5	7	9	7	7	7	9	8	10	3600.29	4327.73	49430.2	26445.2	24759.8	4584.56
E9QAN9	5	5	Ifi203	Interferon-activable protein 203	9.54751	8.77863	8.30366	8.90809	9.57306	8.87854	15.1364	13.7723	13.7713	11.1027	11.8493	9.19679	11.6181	9.69441	9.38718	14.761	15.1372	14.5716	1.1832	0.335209	0	1	0	0	1	1	1	5	4	4	2	2	0	2	1	0	5	5	5	748.32			480.4	761.69	470.66
Q6P6J9	4	4	Txndc15	Thioredoxin domain-containing protein 15	13.791	13.9062	13.7936	11.797	9.75332	12.1302	14.3967	14.1563	11.4848	13.9475	12.7326	14.2549	13.9471	12.847	12.7765	15.0901	15.1017	15.1096	1.17754	0.0781258	0	3	3	3	2	1	2	4	4	2	3	2	4	3	2	2	4	4	4	14174.3	15352.8	14200.2	3558.31	863.06	4482.72
Q62210	6	6	Birc2	Baculoviral IAP repeat-containing protein 2	10.0304	10.1023	13.034	11.1844	10.3143	11.0541	14.8435	14.4571	14.3831	13.1744	12.0064	14.3087	13.3678	11.9163	12.3385	12.9903	14.7323	15.0852	1.16851	0.151857	0	2	2	4	3	2	3	4	4	4	4	3	5	4	3	3	3	4	4	1045.78	1099.22	8387.24	2327.24	1273.26	2126.31
Q61500	5	5	Itm2a	Integral membrane protein 2A	14.6612	9.63428	13.8233	14.3092	13.7721	15.1618	14.4286	12.0892	11.9994	15.012	15.3585	13.3232	14.9888	13.9972	14.4892	13.4844	14.5229	15.2085	1.16729	0.0850314	0	3	1	3	3	3	4	3	2	2	3	3	2	3	2	3	2	3	3	25910	794.71	14495.8	20300.4	13989.6	36656
Q6ZWY8	4	4	Tmsb10	Thymosin beta-10	15.9281	16.3545	15.4114	15.9237	16.1331	16.1725	12.9678	13.401	14.324	16.8933	16.9557	16.8706	17.0985	17.0212	16.9482	14.1421	14.3965	16.7906	1.16672	0.0623626	0	4	4	3	4	4	4	2	2	2	4	4	4	4	4	4	2	2	3	62350.3	83789.9	43581	62160.6	71867.8	73858
E9Q7K9	3	3	Mettl17	Methyltransferase-like protein 17, mitochondrial	8.36558	13.6437	14.7536	13.2257	14.768	14.5715	8.01458	13.2485	8.51369	14.5748	13.6385	14.5266	14.5635	14.753	14.899	9.04571	14.2025	9.37071	1.16327	0.366069	0	1	2	3	2	3	3	1	2	1	3	2	3	3	3	3	1	2	1	329.83	12798.8	27622.8	9579.55	27899.8	24348
A0A1Y7VLA4	3	3	Tasor2	Protein TASOR 2	8.94805	14.2033	8.23831	11.6906	8.57437	8.96633	7.43879	6.60422	12.7706	8.53399	13.048	8.94052	9.41297	9.70606	13.5381	8.79455	13.1446	12.7834	1.16307	0.315062	0	1	3	1	2	1	1	1	1	2	1	2	1	1	1	2	1	2	2	493.89	18862.9	301.98	3305.43	381.19	500.19
P58158	4	4	B3gat3	Galactosylgalactosylxylosylprotein 3-beta-glucuronosyltransferase 3	11.3801	8.69929	13.7519	11.3402	8.52341	11.5031	15.0376	14.657	14.7246	13.6538	12.3824	13.663	13.5988	8.8458	13.5205	15.1556	14.5635	14.678	1.16046	0.282938	0	2	1	3	2	1	2	4	4	4	3	2	3	3	1	3	4	4	3	2665.38	415.67	13795.4	2592.54	367.96	2902.62
A0A0A6YXM5	3	2	Rcor3	REST corepressor 3	12.9556	8.9402	12.9532	8.30364	13.4812	13.961	13.2812	13.4965	13.5246	13.2237	13.267	13.4626	13.5869	13.7934	10.9297	13.8398	14.3618	14.8662	1.15932	0.165022	0	2	1	2	1	2	3	2	2	2	2	2	2	2	2	1	2	3	3	7943.55	491.21	7930.47	315.97	11435.6	15947.4
Q9CR58	4	4	Slc25a30	Kidney mitochondrial carrier protein 1	14.1548	12.9617	13.7526	13.3507	10.1715	13.9723	12.3584	7.82483	13.0721	13.926	14.1396	13.9659	14.3775	13.1269	13.3012	13.2484	13.0754	12.8655	1.15639	0.127803	0	3	2	4	3	1	4	2	1	2	3	3	3	4	2	2	2	2	2	18239.8	7977.58	13802.6	10446.1	1153.22	16071.9
Q9D2R6	3	3	Coa3	Cytochrome c oxidase assembly factor 3 homolog, mitochondrial	8.45096	13.6535	13.6289	14.3813	9.60814	14.5148	15.5454	14.9364	15.1601	14.5117	13.9546	14.388	13.6822	13.4592	14.0968	15.2544	15.3749	15.4845	1.14743	0.210559	0	1	2	2	3	1	3	3	3	3	3	2	3	2	2	3	3	3	3	349.94	12886.1	12668	21341	780.44	23410.1
I3ITR1	3	3	AK157302	Iron-sulfur cluster assembly 1 homolog, mitochondrial	9.31662	9.363	12.1985	12.1569	9.70332	8.49541	12.8657	13.3699	13.5435	12.5949	10.351	12.8365	12.4213	10.3466	12.4258	13.0602	13.5631	13.6813	1.14087	0.161199	0	1	1	2	2	1	0	2	3	3	2	1	2	2	1	2	3	3	3	637.65	658.48	4700.27	4566.59	833.66
Q3TTY5	13	6	Krt2	Keratin, type II cytoskeletal 2 epidermal	16.6739	11.9834	18.3912	17.3284	16.5689	15.4454	16.5049	15.9641	16.677	15.5619	21.5891	16.5322	16.8512	16.1673	16.35	18.8926	17.4348	16.3835	1.13615	0.20379	0	9	3	12	10	10	7	10	9	9	6	14	8	10	9	9	9	10	10	104553	4049.24	343804	164576	97213.4	44620.3
E9Q2R6	4	1	Glod4	Glyoxalase domain containing 4	17.1868	15.6374	16.4089	15.358	16.5033	16.5436	15.1233	14.6876	15.0647	15.3721	18.7593	18.3645	18.2729	16.5107	16.6109	16.3784	16.1237	16.2605	1.1266	0.0344136	0	4	2	3	2	3	3	2	2	2	2	4	4	4	3	3	3	2	2	149186	50971.3	87009.8	41997.5	92894.6	95524.5
P06803	8	8	Pim1	Serine/threonine-protein kinase pim-1	10.5203	9.11499	9.89414	8.53916	10.2678	8.85742	15.4838	14.8265	15.3782	10.7904	9.88255	9.35511	13.2786	9.26828	12.2065	15.8458	16.0114	16.3546	1.12341	0.428327	0	2	1	2	1	2	1	7	5	8	2	1	2	4	1	3	7	8	8	1468.66	554.48	951.55	372	1232.9	463.82
A0A087WQ61	3	3	Ralgps2	Ras-specific guanine nucleotide-releasing factor RalGPS2	13.4538	9.92738	8.83662	13.6583	13.1555	13.9074	13.543	13.7426	13.3933	13.9634	14.2529	13.7831	13.7382	13.7106	13.3342	13.4802	13.7416	13.6213	1.11194	0.096518	0	2	1	1	2	2	2	3	3	2	3	3	2	3	2	2	3	3	3	11220.5	973.73	457.18	12928.4	9124.33	15365.7
E0CYQ0	3	3	Kctd17	Potassium channel tetramerisation domain containing 17	12.5726	10.2419	13.0938	14.0189	10.0546	9.38265	14.6423	14.4828	14.8889	13.0235	13.6578	13.7787	13.0424	13.1654	12.9896	14.3836	15.0116	14.3249	1.11102	0.164479	0	2	1	2	3	1	1	3	3	3	2	3	3	2	2	2	2	3	3	6091.51	1210.92	8742.26	16599.6	1063.47	667.51
P62876	4	4	Polr2l	DNA-directed RNA polymerases I, II, and III subunit RPABC5	14.8107	12.365	14.9402	14.8773	14.9049	14.2109	12.4495	11.555	14.1698	15.5836	15.4297	15.3815	14.9304	15.366	15.3515	13.6065	13.8576	14.7579	1.10904	0.0419115	0	3	2	4	4	4	3	2	2	3	4	4	4	3	4	4	2	2	3	28738.4	5275.28	31436.9	30097.3	30676.8	18962.8
A2AHJ4	3	1	Brwd3	Bromodomain and WD repeat-containing protein 3	8.62176	8.91052	8.13088	8.35652	8.89927	8.49541	12.4352	11.9896	13.9125	8.31918	9.60509	8.98083	9.56931	9.52537	9.38267	14.7198	14.4106	15.1717	1.10365	0.364842	0	0	1	1	0	1	0	2	2	3	1	0	1	1	0	1	3	3	3		481.21	280.31		477.47
A0A1L1SQ32	4	4	Poc1a	POC1 centriolar protein homolog A	14.3747	14.3578	13.1556	13.8087	13.8285	14.3475	11.5869	9.9461	8.70908	14.2925	14.9402	14.6891	14.453	14.559	14.543	12.1147	12.3827	12.0465	1.10064	0.194357	0	3	3	3	3	3	4	3	2	1	3	3	4	3	3	3	2	3	3	21243.1	20994.9	9125.25	14349.5	14547.2	20846.1
A0A0R4J2A0	3	3	Ssh2	Protein phosphatase Slingshot homolog 2	9.85151	10.0244	9.46287	9.68298	9.94125	9.40733	13.8239	13.2625	13.6882	9.63034	12.662	12.6434	12.7782	9.97871	10.0748	13.6274	13.7618	13.782	1.08819	0.227118	0	1	1	1	1	1	1	3	3	3	1	2	2	2	1	1	3	3	3	923.85	1041.47	705.68	821.99	983.14	679.03
O35639	4	4	Anxa3	Annexin A3	11.8822	8.77863	8.30366	9.07009	9.34786	8.49541	13.0187	13.5129	12.8086	12.7366	9.60509	13.9996	10.4887	10.631	10.5304	14.1172	13.1427	9.68208	1.07951	0.270817	0	2	0	0	1	1	0	2	3	2	2	0	3	1	1	1	3	2	0	3774.73			537.49	651.61
P12399	6	6	Ctla2a	Protein CTLA-2-alpha	8.62176	8.5012	9.84292	9.40075	8.63728	11.3391	16.4271	15.8368	16.4582	12.2867	9.60509	11.9622	10.3967	11.9591	8.66164	16.2746	16.3913	17.213	1.07613	0.504977	0	0	1	2	2	1	3	6	6	6	3	0	3	2	3	1	6	6	6		362.34	918.36	675.94	398.18	2590.6
Q8BPY9	3	2	Fignl1	Vacuolar protein sorting-associated protein 4B	11.0537	15.0665	10.715	14.8357	11.5309	11.0505	16.1132	15.2251	16.5803	15.432	16.5613	15.1209	12.0261	11.9861	11.8873	15.8293	16.6327	16.376	1.07564	0.32706	0	1	2	1	2	1	1	3	2	3	2	3	2	1	1	1	2	3	3	2125.73	34313.5	1680.9	29241	2959.01	2120.91
A0A140LIF8	4	3	Irgm2	Interferon gamma induced GTPase	8.25243	12.2936	13.6233	11.5062	12.128	13.6058	15.0849	15.133	15.3073	13.5163	13.4247	14.157	12.77	13.5527	12.7229	15.5807	15.5173	15.3404	1.07192	0.223134	0	1	2	3	2	2	3	4	4	4	3	3	4	2	3	2	4	4	4	304.95	5020.38	12619.2	2908.78	4476.16	12466.4
Q9CQV6	3	3	Map1lc3b	Microtubule-associated proteins 1A/1B light chain 3B	12.2414	10.2507	12.9269	9.46312	9.72595	13.4712	14.1616	13.8081	14.2892	9.08562	13.2895	12.9827	14.5463	13.2285	11.3622	15.1298	15.1674	15.19	1.07151	0.272111	0	2	1	2	1	1	2	2	2	2	0	2	2	3	2	1	2	2	2	4842.16	1218.37	7787.35	705.8	846.84	11356.4
P35330	3	3	Icam2	Intercellular adhesion molecule 2	10.8523	10.9501	10.3506	10.5499	14.6002	10.6516	16.2198	15.7105	16.0998	15.5546	11.1115	15.0278	11.4317	11.316	11.4056	16.2436	16.5534	16.9668	1.06956	0.399247	0	1	1	1	1	2	1	3	3	3	2	1	2	1	1	1	3	3	3	1848.74	1978.4	1305.68	1499.16	24837.3	1608.62
Q9QYM8	3	3	Cenph	Centromere protein H	10.2448	10.5248	13.5733	13.2653	10.5101	10.1133	15.6541	15.1603	15.0613	9.07299	10.7405	14.5099	14.7924	14.3878	14.2279	14.7543	15.4578	15.7546	1.06565	0.340899	0	1	1	2	2	1	1	3	3	3	1	1	2	2	2	2	2	3	3	1213.38	1473.27	12189.2	9845.74	1458.34	1107.63
Q9D7S9	5	5	Chmp5	Charged multivesicular body protein 5	13.1116	11.2718	13.4299	10.761	12.5428	15.0694	11.0397	9.89848	10.8139	13.1724	15.6845	11.212	13.882	15.1486	13.827	11.7412	11.164	11.6959	1.06544	0.196268	0	3	2	3	2	3	4	2	2	2	3	5	2	4	4	3	2	2	2	8850.86	2472.58	11035.6	1735.34	5966.91	34382.9
Q8C5L6	4	4	Inpp5k	Inositol polyphosphate 5-phosphatase K	14.4093	11.2742	12.4495	10.7195	12.6731	14.5262	14.81	14.3134	14.7288	13.0229	13.4079	14.6086	13.5699	13.3081	14.3118	15.6064	15.6123	15.9988	1.0603	0.121395	0	3	1	2	1	2	3	3	3	3	2	2	3	2	2	3	3	3	3	21759.3	2476.77	5593.35	1686.08	6530.83	23594.5
Q9EQ32	7	7	Pik3ap1	Phosphoinositide 3-kinase adapter protein 1	10.6251	9.36925	13.5316	12.7483	13.1059	13.8884	15.4605	14.7277	14.6046	13.8079	14.2291	13.185	13.9062	13.8696	14.1716	15.3306	13.9812	15.0154	1.04836	0.151164	0	2	1	4	3	3	4	6	6	6	4	5	3	4	4	4	7	5	7	1579.38	661.34	11841.6	6880.52	8816.05	15164
A0A1L1SST5	4	4	Spg21	Maspardin	8.59649	8.77749	13.9194	13.6907	13.397	13.776	14.7951	14.389	15.1735	14.1422	13.1075	13.8557	12.5714	12.7038	13.2781	15.5857	15.3363	15.3457	1.04576	0.27013	0	1	1	3	3	3	3	4	4	4	3	2	3	2	2	3	4	4	4	387.08	438.82	15494.3	13222.2	10786.6	14027.4
O35874	4	4	Slc1a4	Neutral amino acid transporter A	11.3554	11.606	13.9497	13.7045	14.8538	14.2284	11.4714	14.2502	12.289	11.3498	15.0293	14.727	13.1051	14.9127	15.3406	14.6612	14.4557	13.5194	1.04362	0.114407	0	2	2	3	3	4	4	2	4	2	2	4	4	3	4	4	3	4	3	2620.06	3117.2	15823	13349.9	29609.9	19194.3
B1AR51	3	3	Dnah9	Dynein, axonemal, heavy chain 9	10.4732	13.753	13.7881	10.4577	10.7184	14.367	14.5689	14.1131	10.4658	15.2406	14.834	11.2345	14.574	16.1493	11.9229	11.5638	14.7794	11.7432	1.03739	0.265601	0	1	2	2	1	1	2	3	2	1	2	2	1	2	3	1	1	2	1	1421.52	13805.5	14146.2	1406.31	1684.86	21130.3
Q6ZWQ7	8	7	Spcs3	Signal peptidase complex subunit 3	16.1375	13.1612	16.5704	15.624	16.5836	16.815	14.096	13.6514	13.9662	15.6161	15.6251	17.0152	17.0898	17.4756	17.4737	15.0269	15.1486	15.4451	1.03453	0.0993685	0	8	4	8	7	8	8	4	4	4	6	7	8	8	8	8	4	4	5	72090.9	9160.18	97313.4	50499.7	98213.7	115298
Q99J08	3	3	Sec14l2	SEC14-like protein 2	12.4439	10.5401	12.4962	10.3959	10.6332	10.1579	11.7856	11.9345	9.5598	14.0802	11.0009	13.2586	10.7333	13.2605	14.0867	12.9626	9.47549	10.3992	1.03451	0.148031	0	2	1	2	1	1	1	2	2	1	3	1	2	1	2	3	2	1	1	5571.58	1488.95	5777.52	1347.3	1588.2	1142.47
Q78WZ7	6	6	Polr1f	DNA-directed RNA polymerase I subunit RPA43	8.96916	12.8671	13.4272	12.3618	10.2239	12.7172	14.694	14.3606	14.0892	13.0469	13.0961	13.8493	12.8503	13.165	12.9205	15.1139	14.1556	14.8216	1.03433	0.158657	0	1	3	3	3	2	3	5	5	4	3	3	4	3	3	3	5	4	5	501.17	7470.85	11015.3	5263.57	1195.93	6733.95
Q3TN34	4	4	Micall2	MICAL-like protein 2	10.5374	10.7631	13.931	14.3483	10.5498	12.7622	14.0656	14.2725	13.8277	14.4908	11.6759	14.5427	14.3257	13.2051	13.9646	13.9779	14.0823	14.0786	1.03176	0.124851	0	2	2	4	4	2	3	3	4	3	4	2	4	4	3	4	3	3	3	1486.18	1737.91	15619.1	20858.5	1499.04	6947.07
Q8CBA2	4	4	Slfn5	Schlafen family member 5	8.19328	10.7937	11.2773	11.3435	13.605	11.5101	14.1814	13.9716	13.6314	13.1944	9.60509	13.2282	14.33	12.0911	12.1609	14.6823	14.3705	14.1189	1.03046	0.242043	0	1	2	2	2	3	2	5	5	3	3	0	3	3	2	2	4	5	5	292.7	1775.1	2481.98	2598.64	12459.7	2916.68
Q921K8	4	4	Tcaf2	TRPM8 channel-associated factor 2	15.0642	13.7512	14.9327	14.3815	15.191	14.9692	11.3467	8.411	9.12808	14.3406	15.1418	15.8611	16.0917	15.5709	15.4371	9.749	9.17876	15.0736	1.02988	0.425444	0	3	2	3	2	3	3	2	1	0	2	3	3	4	3	3	0	1	3	34259.5	13789.1	31274.6	21342.8	37405.2	32075.8
A6X919	6	6	Dpy19l1	Probable C-mannosyltransferase DPY19L1	11.1498	11.2661	14.855	14.1862	11.3359	10.7749	14.9463	14.7488	15.2556	13.4583	11.5615	14.9147	14.2783	13.2042	13.475	15.9091	15.3137	15.6283	1.02494	0.220017	0	2	2	5	4	2	2	5	5	5	3	2	5	4	3	3	5	5	5	2272.08	2462.75	29634.8	18641.2	2584.98	1752.11
Q61001	5	5	Lama5	Laminin subunit alpha-5	13.7856	14.1806	13.6291	14.0842	13.8135	13.5354	9.2131	12.228	10.2904	14.0596	13.5379	13.9998	13.588	14.2024	13.763	13.8028	13.3673	13.6386	1.02215	0.113553	0	4	4	4	4	4	4	2	3	2	5	4	4	4	5	4	4	4	4	14121.9	18568.6	12669.7	17369.2	14397.6	11873
E0CXB9	3	1	Ctnna2	Catenin alpha-1	13.9248	13.883	13.2719	13.5166	13.136	10.8606	10.4788	13.4075	14.2395	14.177	14.1419	14.0178	14.2706	13.2678	13.6646	14.47	14.2063	13.7012	1.02203	0.0440765	0	2	2	2	2	2	1	1	2	2	2	2	3	3	2	2	2	2	3	15551.7	15107.7	9890.67	11719.3	9002.07	1859.42
P08883	5	3	Gzmf	Granzyme C	10.0398	10.1886	14.7752	12.3406	13.8345	13.3591	18.9166	17.9952	17.3046	12.367	14.2855	15.0932	13.9581	14.9966	13.3152	19.1902	17.3707	17.374	1.02183	0.446544	0	1	1	4	2	3	3	6	6	5	2	3	4	3	3	2	6	6	6	1052.67	1166.98	28040.1	5186.63	14608.1	10507.2
A0A1Y7VLZ7	5	2	Pacs2	Phosphofurin acidic cluster sorting protein 1	11.3233	11.551	10.6853	10.9191	11.375	15.1118	15.3256	14.6362	15.229	11.3874	11.9932	13.3101	13.5738	13.3884	15.118	15.4585	15.6387	15.4668	1.01983	0.259217	0	2	2	2	2	2	4	4	3	4	2	2	3	3	3	4	4	4	4	2562.51	3000.51	1646.68	1936.34	2655.94	35409.3
E9PY85	4	4	Rsl24d1	Probable ribosome biogenesis protein RLP24	12.2772	8.77863	15.9858	13.9586	15.3845	11.6218	16.4117	15.862	15.7025	11.9644	12.6482	14.6433	14.844	14.3337	15.6885	17.1963	17.0043	16.8328	1.0192	0.35361	0	1	0	3	2	3	1	3	3	2	1	1	2	2	2	3	4	3	3	4963.69		64895.1	15920.5	42776.2	3151.35
Q8VIB3	3	3	St3gal6	Type 2 lactosamine alpha-2,3-sialyltransferase	12.1574	8.77863	8.30366	7.48583	8.97386	8.7039	13.5397	13.754	13.3968	9.6616	9.60509	9.19679	9.68575	13.5745	9.38718	14.0573	14.2474	14.8057	1.01417	0.408197	0	1	0	0	1	0	1	2	2	2	1	0	0	1	2	0	2	2	2	4568.32			179.25		417
A0A2I3BQA9	4	4	Wbp4	WW domain-binding protein 4	14.4376	13.8925	13.8139	14.6532	13.4779	13.8721	8.12619	12.3764	12.6634	14.7549	14.1354	14.5205	13.925	13.6821	13.6209	12.6959	16.4006	12.7006	1.01363	0.201724	0	2	2	2	3	2	2	1	2	2	3	2	3	2	2	2	3	3	2	22190.3	15207.8	14401.4	25766.1	11409	14993.9
E9Q557	38	38	Dsp	Desmoplakin	14.7799	8.4127	15.1902	13.6678	10.4421	9.97199	13.0162	8.31002	14.9443	12.6757	18.1771	9.45681	10.2815	9.52537	12.5162	19.0099	14.9298	11.2801	1.01304	0.513207	0	9	1	11	7	4	4	7	4	12	6	25	3	4	0	5	38	12	5	28130.8	340.78	37384.7	13014.4	1391.15	1004.31
P63271	3	3	Supt4h1a	Transcription elongation factor SPT4-A	12.7065	12.0378	15.2495	12.4181	12.9437	14.4771	15.2904	15.0415	13.4146	15.6824	13.8207	14.6998	14.0942	14.7441	14.4143	15.3591	14.1675	15.6949	1.01089	0.0555103	0	2	2	4	2	2	3	3	3	2	4	2	3	3	3	3	3	2	3	6684.09	4204.63	38953.1	5472.94	7878.36	22805.9
Q64343	3	3	Abcg1	ATP-binding cassette sub-family G member 1	8.99927	13.9512	13.6527	8.35652	14.1444	13.5771	14.5079	13.6533	13.5173	14.4631	13.7294	13.7864	14.5818	14.5136	10.9941	13.4988	14.0631	13.8005	1.00789	0.254111	0	1	2	2	0	2	2	3	2	2	3	2	2	3	3	1	2	3	2	511.74	15839.2	12878.5		18109.2	12221.6
Q924Z5	3	3	Tram2	Translocating chain-associated membrane protein 2	8.75485	10.933	11.3954	11.5774	14.0328	11.3528	15.0064	15.1066	15.0508	14.2863	9.86442	14.9198	9.49293	13.9254	14.1066	15.0844	15.393	15.1925	1.00612	0.362919	0	1	2	2	2	3	2	4	4	4	3	1	4	1	3	3	4	4	4	431.99	1955.11	2693.78	3056	16760.9	2615.41
Q8VDV8	5	5	Mitd1	MIT domain-containing protein 1	12.8694	12.146	13.7039	11.0175	13.6761	13.6354	14.2354	9.2547	14.2541	13.3978	14.1314	13.8564	13.4141	12.8492	13.0589	14.3482	14.3101	14.431	1.00051	0.111721	0	4	3	4	2	4	4	4	2	4	3	3	4	4	3	3	4	4	4	7482.79	4532.2	13344	2073.03	13089.6	12725.3
H7BXB6	3	3	Clec16a	Protein CLEC16A	8.62176	8.77863	8.22391	8.35652	8.97386	8.49541	11.9999	13.5173	13.447	8.59369	8.80793	9.08252	13.882	9.52537	9.04363	14.0621	13.1907	13.2258	0.999941	0.380444	0	0	0	1	0	0	0	2	3	3	1	1	1	2	0	1	3	2	2			298.98
Q99LB0	6	6	Dnttip1	Deoxynucleotidyltransferase terminal-interacting protein 1	11.812	9.56157	14.0555	13.6941	14.7563	14.5857	15.1068	14.941	13.4954	14.2165	13.9416	14.1797	14.9038	14.4192	14.4462	14.7849	15.0111	15.1015	0.999575	0.124934	0	3	2	4	4	6	6	4	4	3	5	4	4	6	5	5	4	4	4	3595.5	755.65	17026.1	13253.2	27675.9	24587.9
Q5XKN4	3	3	Jagn1	Protein jagunal homolog 1	9.63116	9.80988	14.5526	14.0689	14.5976	14.5607	14.448	14.482	14.3976	14.3267	14.3547	14.39	14.0563	14.013	14.4819	14.6922	14.5166	14.6959	0.997636	0.173907	0	1	1	3	3	3	3	3	3	3	2	2	3	3	2	3	3	3	3	792.99	897.57	24031.5	17185.9	24792.2	24165.8
Q9D820	3	3	Prorsd1	Prolyl-tRNA synthetase associated domain-containing protein 1	7.75235	8.65191	7.61486	7.94691	8.47111	7.4192	14.2833	14.1778	13.9684	7.97814	9.60509	9.19679	8.17687	12.411	8.54894	13.9937	14.4403	14.9039	0.996525	0.490624	0	1	1	1	1	1	1	4	3	3	1	0	0	1	2	1	3	4	4	215.62	402.24	196.02	246.75	354.86	171.16
B1AR13	3	3	Cisd3	CDGSH iron-sulfur domain-containing protein 3, mitochondrial	15.0429	15.0953	14.2926	14.8588	14.5689	14.5076	10.5256	10.0389	11.0037	15.5798	15.785	15.3478	15.2592	15.3786	15.3057	12.1024	11.6615	12.4764	0.995785	0.289523	0	4	4	4	4	4	4	2	2	2	4	4	4	4	4	4	2	2	3	33757.3	35005.6	20067.2	29712.7	24304.1	23292.7
Q3U4N2	3	3	Icmt	Protein-S-isoprenylcysteine O-methyltransferase	8.24436	8.77863	12.7142	13.2542	13.1765	13.3065	13.2734	13.0119	12.8436	13.0015	13.0656	13.2366	12.9588	12.7595	13.3618	13.1274	13.1065	12.9411	0.995072	0.162309	0	1	0	2	3	3	3	2	2	2	2	2	3	3	2	3	2	2	2	303.25		6719.76	9770.47	9257.8	10131.4
E9PX30	5	5	Map4k5	Mitogen-activated protein kinase kinase kinase kinase 5	10.7276	8.78676	10.3703	13.3384	10.7722	8.07826	14.7983	13.819	13.8358	11.1103	11.2503	11.3549	12.1897	11.3027	11.436	15.2262	14.7178	14.838	0.988828	0.336276	0	2	1	2	4	2	1	5	4	4	2	2	2	3	2	2	5	5	5	1695.61	441.65	1323.61	10357.4	1748.87	270.27
Q8BLY7	3	3	Hps6	BLOC-2 complex member HPS6	10.2521	12.8157	9.5291	9.72069	13.4293	13.8643	14.3761	14.2548	14.3813	13.5197	10.969	13.2561	13.5187	13.5007	13.6447	14.4561	14.336	14.311	0.987605	0.221141	0	1	2	1	1	2	2	3	3	3	2	1	2	2	2	2	3	3	3	1219.51	7209.78	738.83	843.76	11031.4	14913.4
O35493	4	2	Clk4	Dual specificity protein kinase CLK4	13.9284	8.98413	11.9616	12.7914	13.0196	13.4531	13.5268	13.5662	13.028	14.638	13.3517	12.8552	13.3222	13.5528	14.7419	13.4921	13.0984	14.0946	0.987496	0.0902937	0	4	1	2	2	2	3	3	3	2	4	3	2	2	3	4	3	3	3	15591.1	506.4	3988.55	7089.38	8304.24	11215.1
Q91Y74	4	4	St3gal4	CMP-N-acetylneuraminate-beta-galactosamide-alpha-2,3-sialyltransferase 4	12.3122	12.252	12.3848	14.5827	13.4518	13.259	12.8299	12.4569	12.6904	15.4035	13.5664	13.3466	15.2018	13.0238	12.9376	13.6414	15.0735	12.8921	0.98524	0.034363	0	2	2	2	4	3	3	2	2	2	4	3	3	4	2	2	3	4	2	5085.69	4877.89	5348.09	24536.7	11204.3	9802.87
D3Z3B4	4	4	Nrf1	Nuclear respiratory factor 1	14.7349	9.59513	15.1844	14.764	12.6108	15.5682	15.0752	13.8794	14.9393	14.3905	14.8512	14.7634	15.7193	13.5769	14.6545	15.0535	16.0043	16.175	0.981902	0.171422	0	3	1	4	3	2	4	3	2	3	2	3	3	4	2	3	3	3	3	27268.3	773.43	37236.4	27823.5	6255.23	48582.5
Q6NXH9	8	1	Krt73	Keratin, type II cytoskeletal 73	17.5335	15.0067	18.7983	17.9035	17.2559	16.5469	17.1285	16.8895	17.5959	16.5906	21.9186	17.297	17.4628	17.2577	17.0798	20.6153	18.1612	17.0822	0.978499	0.183385	0	7	4	8	7	7	7	7	7	6	6	8	7	7	8	7	8	8	7	189724	32919.7	455879	245179	156509	95745.9
F8WHW6	4	4	Pip5k1c	Phosphatidylinositol 4-phosphate 5-kinase type-1 gamma	7.87221	8.00843	12.7802	10.9245	11.9294	11.2383	13.8387	12.5737	12.3125	11.4303	11.5946	11.0127	11.2393	11.2247	11.1002	13.0116	14.903	14.738	0.975144	0.277793	0	1	1	4	2	3	2	4	3	3	2	2	2	2	2	2	3	4	4	234.3	257.5	7034.31	1943.64	3900.27	2415.82
A0A0R4J036	4	2	Nefm	Neurofilament medium polypeptide	18.9887	15.7998	19.2843	18.2977	19.0032	18.4775	15.2396	15.4532	13.7758	17.9733	19.3056	19.3312	17.5977	19.8964	19.2128	14.7249	17.0373	18.0124	0.974634	0.278783	0	3	2	5	3	3	3	3	3	3	3	3	4	2	5	3	3	3	4	520208	57045.8	638504	322220	525462	364987
Q61176	3	3	Arg1	Arginase-1	9.28501	9.61248	12.649	9.47369	9.81924	8.16219	13.035	13.6017	12.5258	10.2194	13.6724	10.3831	12.969	9.52537	10.2279	14.3338	13.8912	11.7137	0.974629	0.302641	0	1	1	2	1	1	1	2	2	2	1	2	1	2	0	1	3	3	1	623.83	782.79	6423.05	710.99	903.41	286.46
Q8BG55	3	3	Gpr171	G-protein coupled receptor 171	13.2833	12.9668	12.2582	9.46477	13.4444	14.0096	13.4048	8.43308	13.417	9.99046	13.9161	13.8159	13.9475	14.0853	14.7246	13.6698	10.7382	14.5268	0.970283	0.278935	0	2	2	2	1	2	2	2	1	2	1	2	2	2	2	3	2	1	3	9969.59	8005.59	4898.82	706.61	11147.6	16493.4
P58064	5	5	Mrps6	28S ribosomal protein S6, mitochondrial	10.9912	11.2108	13.6455	13.451	13.6017	13.5041	14.2397	13.0426	13.0541	11.335	13.8736	11.3028	14.4607	13.9009	13.6683	14.7061	18.4123	13.8085	0.969714	0.236242	0	1	1	2	2	2	2	3	2	2	1	2	1	3	2	2	3	4	3	2035.57	2370.2	12814.2	11198.3	12431.8	11618.4
Q60636	4	3	Prdm1	PR domain zinc finger protein 1	13.4345	8.80668	13.0632	13.4408	11.5699	12.0376	8.1416	13.4035	8.63103	12.4386	12.4585	12.6333	12.5351	13.2228	12.1896	12.8541	12.8301	10.0744	0.967522	0.249093	0	3	1	3	3	2	2	1	3	1	2	2	2	2	3	2	2	2	1	11071.2	447.79	8558.79	11119.7	3040.09	4204.07
Q9CQF8	3	3	Mrpl57	Ribosomal protein 63, mitochondrial	14.6722	14.7403	14.9719	14.507	15.1898	15.2269	14.8239	12.282	12.8442	14.9497	15.9208	15.8621	15.6779	15.7874	15.7842	14.769	14.6518	14.5111	0.961754	0.0295491	0	3	3	4	3	4	4	3	2	2	3	4	4	4	4	4	3	3	3	26108.6	27370	32136.1	23282.9	37374.9	38348.6
Q6NZI9	3	3	Zfp180	Zinc finger protein 180	12.6399	9.63127	13.3773	13.2845	12.5021	12.707	8.80423	12.3129	9.18634	12.9387	13.1771	12.5672	12.969	13.2248	12.9193	10.1301	12.4948	12.6663	0.960207	0.183365	0	2	1	3	3	2	2	1	2	1	2	2	2	3	3	2	1	2	2	6382.58	793.05	10640.5	9977.73	5801.02	6686.24
O55091	5	5	Impact	Protein IMPACT	14.455	12.9972	11.9888	12.5012	11.1852	12.3652	15.5588	14.6804	15.844	15.434	13.1628	13.6524	13.9115	12.9633	12.8381	16.3789	15.956	15.9032	0.958264	0.209531	0	5	3	3	3	2	3	6	5	6	6	3	4	4	3	3	6	6	6	22459.3	8175.97	4064.45	5797.52	2328.49	5275.83
Q9DCU6	6	6	Mrpl4	39S ribosomal protein L4, mitochondrial	10.556	10.6764	13.9138	14.0772	10.6115	13.4103	12.4488	13.8922	13.942	12.4924	14.1778	13.51	13.4696	13.4108	13.7924	13.8765	13.7873	13.6297	0.957577	0.0999465	0	2	2	5	5	2	4	3	5	5	3	5	4	4	4	4	4	5	4	1505.52	1636.55	15433.4	17284.8	1564.52	10886.7
A0A1L1SS44	4	4	Aplp2	Amyloid beta precursor like protein 2	10.1322	8.78663	7.70667	8.07286	8.49289	10.7716	14.3131	14.4185	14.4608	11.2509	11.3883	8.47025	13.1293	9.52537	8.83013	14.6607	14.2751	14.2071	0.953562	0.457762	0	2	1	1	1	1	2	4	4	4	2	2	1	3	0	1	4	4	4	1122.23	441.61	208.9	269.26	360.26	1748.12
F7AVN4	4	4	Hmg20b	SWI/SNF-related matrix-associated actin-dependent regulator of chromatin subfamily E member 1-related	9.75215	9.96798	11.8109	14.1964	9.81575	14.3236	14.9566	14.7067	14.427	12.9015	13.0817	14.3223	13.7979	12.8195	10.012	15.2585	15.187	15.1444	0.951961	0.330143	0	1	1	2	3	1	3	4	4	4	2	2	3	3	2	1	4	4	4	862.36	1001.52	3592.73	18772.8	901.23	20503.6
Q8R179	4	4	Kbtbd4	Kelch repeat and BTB domain-containing protein 4	12.7278	10.158	13.4227	13.1718	13.5442	9.35845	13.0047	13.14	12.6303	13.5442	12.7708	13.4908	13.2537	13.9758	13.0274	13.4683	13.0803	13.0987	0.950226	0.0851639	0	2	1	3	2	3	1	3	3	2	3	2	3	3	3	2	3	3	2	6783.57	1142.54	10981	9228.11	11945.8	656.41
Q3TP92	3	3	Ctdnep1	CTD nuclear envelope phosphatase 1	9.16679	9.36118	13.54	13.4597	13.1968	9.26494	15.1364	14.7649	14.6339	13.9705	13.9135	14.6251	9.84119	10.0614	13.8642	14.7413	14.7472	15.3115	0.950148	0.391811	0	1	1	2	2	2	1	3	3	3	2	2	3	1	1	2	3	3	3	574.75	657.65	11911.3	11265.8	9389.09	615.21
Q5SVP0	5	4	9930111J21Rik1	RIKEN cDNA 9930111J21 gene 1	9.3372	9.54162	8.30366	9.15051	9.47157	12.0513	15.7396	15.5737	14.6158	11.5975	13.8096	9.63733	12.2438	10.4205	9.30371	14.7414	15.1736	15.3841	0.947403	0.471379	0	1	1	0	1	1	2	5	4	4	2	3	1	2	1	1	4	4	4	646.81	745.27		568.3	709.95	4244.13
Q9CR98	6	6	Fam136a	Protein FAM136A	15.2978	11.4455	15.9293	15.5521	13.6478	13.128	16.7305	16.3265	16.3021	16.5285	14.504	16.2355	15.4624	13.9169	15.4391	16.8658	16.8817	17.0266	0.944538	0.197813	0	4	2	5	5	3	3	6	6	5	5	3	5	4	3	5	5	6	5	40281.3	2789.03	62399.7	48045.8	12835.4	8951.74
Q5SXI5	3	3	Znf496	Zinc finger protein 496	12.1465	13.4699	12.2325	8.70068	12.9601	8.47391	11.7658	12.2938	12.0566	12.8297	13.3546	13.4711	13.2561	9.42076	12.4301	12.6175	12.3825	12.8262	0.943176	0.206259	0	2	3	2	1	3	1	2	2	2	2	3	3	3	1	2	2	2	3	4533.89	11346.2	4812.15	416.07	7968.63	355.55
Q9JMK0	4	4	B4galt5	Beta-1,4-galactosyltransferase 5	10.5164	9.34589	13.7357	12.2221	12.2848	15.2607	15.5953	15.5651	15.7572	13.9713	14.2777	13.6339	13.6823	14.7529	12.433	15.7679	15.5108	14.7141	0.94006	0.29562	0	2	1	3	2	2	4	5	5	5	3	3	3	3	4	2	5	4	5	1464.75	650.72	13641.3	4777.55	4990.01	39257.5
P55271	3	3	Cdkn2b	Cyclin-dependent kinase 4 inhibitor B	9.66459	8.77863	8.30366	7.815	8.97386	9.27996	13.307	13.4327	14.4788	9.23273	9.60509	8.47618	9.47488	12.0995	11.748	14.4711	14.2282	13.123	0.936046	0.422217	0	1	0	0	1	0	1	4	4	4	1	0	1	0	2	2	4	4	3	811.58			225.19		621.65
Q8BWD8	4	3	Cdk19	Cyclin-dependent kinase 19	12.9486	14.6138	14.8251	12.3645	9.51003	14.6772	15.4219	15.3892	15.2605	14.6822	13.5725	14.7354	14.7225	14.6385	14.6262	15.3737	15.6729	15.4074	0.935623	0.191772	0	2	3	3	2	1	3	4	4	4	3	2	3	3	3	3	4	4	4	7905.31	25072.1	29026	5273.51	729.13	26198.1
Q9D385	3	3	Arl2bp	ADP-ribosylation factor-like protein 2-binding protein	8.85212	8.87157	11.922	8.99645	9.34614	8.72622	13.3932	12.9568	13.1679	9.27139	9.81734	12.4116	9.71543	10.1936	9.47039	14.1003	14.9416	14.6812	0.930042	0.395103	0	1	1	2	1	1	1	2	2	2	1	1	2	1	1	1	2	3	2	462.12	468.39	3880.3	510.74	650.83	423.5
Q64685	8	8	St6gal1	Beta-galactoside alpha-2,6-sialyltransferase 1	15.2557	15.3594	15.657	15.3214	14.3988	14.9656	10.8284	11.3713	14.0541	15.5225	14.8376	15.5524	14.9219	14.5453	14.4305	14.5838	15.9417	15.2389	0.929226	0.155919	0	5	5	7	6	5	6	3	3	5	7	5	7	5	5	4	6	7	7	39121.8	42036.4	51667.9	40945.9	21600.6	31995.4
P21279	3	2	Gnaq	Guanine nucleotide-binding protein subunit alpha-13	8.62176	8.77863	10.0782	9.18331	8.97386	9.02777	16.128	16.0388	16.3627	9.77419	9.47387	15.1689	9.81617	9.47998	9.79917	16.2503	16.0438	15.7455	0.928771	0.571007	0	0	0	1	1	0	1	3	3	3	1	1	2	1	1	1	3	3	3			1081.01	581.37		521.95
A0A0R4J099	4	4	2210016L21Rik	Protein CUSTOS	8.90159	10.7889	13.4127	11.5735	11.0843	11.1651	14.0876	13.5821	14.0602	11.5012	11.7523	13.3787	12.7358	11.9776	12.274	14.581	14.3828	14.4211	0.927595	0.21906	0	1	2	4	2	2	2	4	4	4	2	2	3	3	3	3	4	4	4	478.24	1769.26	10905.3	3047.78	2171.22	2296.27
D3Z326	3	1	Crem	Cyclic AMP-responsive element-binding protein 1	10.6107	10.5594	10.5104	10.2581	13.2202	14.7779	15.7651	15.7485	15.0589	11.0566	10.9672	14.825	14.3098	13.702	11.0845	16.1374	16.0837	16.6404	0.921914	0.424127	0	1	1	1	1	2	3	3	3	2	1	1	3	2	2	1	3	3	2	1563.61	1509.03	1458.68	1224.59	9542.94	28093.1
O54790	3	3	Mafg	Transcription factor MafG	13.8649	13.8132	13.4338	13.5553	10.7389	10.1688	13.7333	13.7658	13.7618	14.3012	14.0716	13.9496	13.9408	14.0801	13.4169	13.8291	13.6099	13.9266	0.92111	0.078462	0	2	2	2	2	1	1	3	3	3	3	2	3	2	2	2	3	3	3	14919.8	14393.9	11065.5	12038.3	1708.91	1151.07
Q9DCV4	3	3	Rmdn1	Regulator of microtubule dynamics protein 1	11.8733	8.89008	12.2148	8.29384	12.2798	8.52638	13.9636	13.3575	13.6928	8.56963	9.53559	12.8362	13.2803	13.0618	12.65	13.5958	13.804	14.0443	0.920615	0.37074	0	2	1	2	1	2	1	3	3	3	1	1	2	2	2	2	3	3	3	3751.67	474.44	4753.42	313.83	4972.62	368.72
A0A1N9PTV1	4	4	Fbrs	Fibrosin	12.5573	12.7667	12.21	12.2457	12.4916	13.8311	15.5675	15.5086	12.7718	12.7105	12.93	12.6981	13.6021	13.6047	12.8102	16.7158	16.5201	16.6405	0.920194	0.238931	0	2	2	2	2	2	3	4	4	2	2	2	2	3	3	2	4	4	4	6027.24	6968.72	4737.79	4856.44	5759.07	14574
A0A2I3BQJ3	4	4	Reep4	Receptor expression-enhancing protein 4	15.0036	14.4534	15.313	14.9118	15.0351	15.3348	14.7362	6.52842	12.7371	15.4173	15.3131	15.4612	15.4008	15.5253	15.3905	9.09497	15.189	15.4919	0.914531	0.448091	0	3	3	4	3	3	3	3	1	2	3	3	3	3	3	3	1	2	3	32849.8	22433.9	40707.7	30825.4	33575.2	41327.4
Q8BM72	7	7	Hspa13	Heat shock 70 kDa protein 13	11.3364	10.7417	12.8756	10.865	11.0602	11.4029	15.1687	15.5514	15.9117	11.5862	11.6229	11.4754	11.5734	15.3049	13.884	16.0045	16.0957	15.5586	0.910224	0.380458	0	3	2	4	2	2	3	7	8	7	3	3	3	3	6	5	7	8	7	2585.74	1712.22	7515.24	1865.05	2135.28	2707.74
E9QKK8	4	4	Atp11c	Phospholipid-transporting ATPase	10.2146	12.7777	13.7131	9.84987	13.8855	13.5314	13.4373	13.3621	13.8242	13.2312	13.0929	13.5524	13.9946	14.2057	14.1087	13.7448	13.5354	13.2692	0.904321	0.113187	0	2	3	4	2	4	3	3	3	3	3	3	3	4	4	4	3	3	3	1188.25	7022.32	13429.1	922.8	15133.8	11840.3
Q91YN9	5	5	Bag2	BAG family molecular chaperone regulator 2	14.9475	14.9067	14.5813	14.9071	15.0512	14.4665	14.1442	11.2359	12.1765	16.0849	15.5427	15.2713	15.6648	15.6405	15.2963	14.8028	12.4546	13.7838	0.902763	0.149754	0	4	4	4	4	4	3	4	2	2	5	3	4	5	4	3	4	2	3	31597.4	30716	24514.2	30724.9	33952.2	22638.5
Q9CWU2	6	6	Zdhhc13	Palmitoyltransferase ZDHHC13	11.6875	11.6944	11.3656	11.4738	10.9346	10.5868	15.5999	12.9077	14.1183	10.9147	11.945	11.0337	11.6924	11.8779	11.7109	15.9977	16.5952	16.7062	0.900578	0.37796	0	3	3	3	3	2	2	5	3	4	2	3	2	3	3	3	5	6	5	3298.34	3314.17	2638.65	2844.25	1957.2	1538.01
Q99P91	4	4	Gpnmb	Transmembrane glycoprotein NMB	13.5442	12.0302	13.2386	14.2145	13.2147	8.36838	13.5908	13.9668	8.27352	10.7459	13.9558	13.6312	13.2402	13.4573	13.1582	12.4784	13.0505	14.7888	0.896058	0.311907	0	3	2	3	4	4	1	4	4	1	2	4	4	3	3	3	2	3	4	11945.6	4182.55	9665.62	19010.7	9506.82	330.47
O08992	7	7	Sdcbp	Syntenin-1	16.4737	16.2248	15.7211	16.0663	15.734	16.4715	9.44549	6.81301	8.6726	16.1655	16.348	16.0241	16.0819	16.0046	15.8708	10.496	9.35718	13.3226	0.89425	0.584662	0	5	4	4	5	5	5	2	1	1	5	5	5	4	5	4	2	2	3	91008.6	76588.5	54015.4	68617.4	54501.1	90870.1
A2AKD6	4	4	Pxmp4	Peroxisomal membrane protein 4	14.2351	11.9249	14.0157	13.5932	11.6781	14.1738	13.9914	13.8086	14.2039	14.0482	14.8991	14.6391	14.5686	14.4017	14.7585	14.2564	13.9111	14.1714	0.892155	0.0213103	0	3	2	3	3	2	3	4	3	4	3	4	4	4	4	4	3	3	3	19284.2	3888.13	16563.7	12358.3	3276.91	18481
Q99KN1	3	3	Arrdc1	Arrestin domain-containing protein 1	10.4068	10.4325	10.0195	10.1829	10.5998	14.1653	13.5578	11.7192	13.8659	11.0437	11.2903	10.954	11.1683	11.0672	11.1734	15.4559	15.2893	15.5024	0.888319	0.348445	0	2	2	2	2	2	4	3	3	4	2	2	2	2	2	2	3	3	3	1357.52	1381.98	1037.95	1162.39	1551.84	18372.8
A0A0R4J0X7	4	2	Gapdhs	Glyceraldehyde-3-phosphate dehydrogenase, testis-specific	16.0133	15.615	16.3279	15.7811	12.8184	15.6782	16.0136	15.4933	12.8074	16.4827	16.281	16.2282	16.3152	15.1889	16.133	15.8782	15.9131	16.1215	0.88818	0.0774574	0	4	4	4	4	2	3	3	3	2	4	4	4	4	3	4	3	3	3	66144.8	50185.3	82257.8	56309.7	7222.91	52434.8
Q9JMG7	5	2	Hdgfl3	Hepatoma-derived growth factor-related protein 3	18.2534	18.3102	18.7894	18.5062	18.4726	18.5902	15.5509	15.8069	15.6162	17.8756	19.5925	19.5539	19.0831	19.017	19.4222	17.3495	16.8163	17.1751	0.88768	0.160942	0	5	5	6	5	5	6	3	3	3	4	6	6	6	5	6	3	3	3	312482	325019	453079	372330	363744	394654
Q9DC04	5	5	Rgs3	Regulator of G-protein signaling 3	11.7327	11.8778	11.0386	14.9763	15.5256	15.207	15.6432	15.576	15.5729	14.3342	14.5221	14.5833	15.1085	15.5769	15.152	15.713	15.192	14.9487	0.886741	0.204943	0	2	2	2	4	5	5	5	5	5	3	3	4	5	5	5	5	5	5	3403.23	3763.43	2103.5	32233.4	47170.4	37824.4
Q02566	3	2	Myh6	Myosin-6	15.1411	15.1412	15.7117	16.4479	14.838	15.8758	9.08321	15.9056	16.1413	15.964	16.337	15.9801	15.5461	16.1058	12.0786	16.8266	16.7693	16.6567	0.886496	0.33634	0	2	2	2	3	2	3	1	2	2	2	3	2	2	3	1	2	2	2	36135.7	36136.2	53665.9	89392.9	29286.7	60128.5
Q5DU09	3	3	Znf652	Zinc finger protein 652	11.5172	9.89657	8.87624	12.0933	9.80092	9.22096	13.0131	9.36435	13.9777	9.08562	9.14932	12.8312	9.88725	12.942	10.0439	13.964	13.9065	13.9278	0.886364	0.362386	0	2	1	1	2	1	1	2	1	2	0	1	2	1	2	1	2	2	2	2931	953.16	469.91	4369.68	892.01	596.74
Q91WB4	4	4	Plekhf2	Pleckstrin homology domain-containing family F member 2	14.8394	14.9766	14.5951	14.313	14.7362	14.7984	12.283	11.6725	12.4949	15.6782	15.0051	15.4287	15.5563	15.0539	15.3333	13.6128	13.4531	13.55	0.88469	0.117784	0	3	3	4	3	4	4	2	2	2	4	3	4	4	3	3	2	2	2	29316.2	32241.4	24749.2	20353.7	27292.6	28494.7
D3YTT9	3	3	Zzz3	ZZ-type zinc finger-containing protein 3	9.26625	9.48888	13.9721	13.6996	9.46976	13.7129	14.0147	13.7127	14.2478	13.4895	13.6608	13.4848	13.6026	13.7524	10.5397	13.6674	13.9169	13.422	0.883478	0.300817	0	1	1	3	2	1	2	3	3	3	2	2	2	2	2	1	3	3	3	615.77	718.52	16070.2	13304	709.06	13427.6
O54827	3	3	Atp10a	Phospholipid-transporting ATPase VA	12.7983	8.67352	7.93038	8.08889	12.8764	12.5673	12.545	12.8142	13.0666	12.8877	9.33432	11.4815	12.7855	12.6547	13.1221	11.8428	12.1083	13.0873	0.882632	0.320436	0	3	1	1	1	2	3	3	3	2	2	1	2	2	3	2	2	2	3	7123.28	408.31	243.94	272.27	7519.52	6069.29
O35284	3	3	Batf	Basic leucine zipper transcriptional factor ATF-like	11.355	11.7406	13.0751	11.3494	11.2133	11.0516	14.9199	14.1542	15.0748	11.8405	11.9765	13.1176	12.838	11.7414	12.0151	15.918	16.146	16.2572	0.879607	0.323514	0	2	2	3	2	2	2	3	3	3	2	2	3	3	2	2	3	3	3	2619.36	3421.96	8629.7	2609.13	2374.39	2122.63
A0A1L1ST61	4	4	Higd1a	HIG1 domain family member 1A, mitochondrial	17.5161	17.0857	17.4234	17.3042	16.9156	17.2628	13.9851	13.6701	14.3054	18.2207	18.1516	18.175	17.9267	17.8731	17.1163	15.5876	15.0949	15.2148	0.876941	0.235171	0	4	4	4	4	4	4	2	2	2	4	4	4	4	4	3	3	2	2	187438	139093	175784	161840	123628	157259
Q9JI39	8	7	Abcb10	ATP-binding cassette sub-family B member 10, mitochondrial	12.1773	13.4787	15.2224	11.7571	14.5973	14.8292	16.1054	15.9744	16.0674	15.3319	14.5824	14.0453	15.1844	15.3021	15.4991	16.1345	16.1014	15.9083	0.875574	0.161656	0	3	4	6	3	5	5	8	8	8	6	5	4	6	6	6	8	8	7	4631.49	11415.2	38230.2	3461.25	24787.8	29110.1
Q5Y5T1	4	4	Zdhhc20	Palmitoyltransferase ZDHHC20	14.2555	14.0142	11.31	11.3528	13.7355	14.048	14.6028	14.972	15.4127	14.6071	14.5976	14.2483	14.4531	14.7704	14.4818	15.0548	14.4927	14.872	0.874941	0.0956309	0	4	4	2	2	3	4	4	5	5	4	4	4	5	4	4	5	5	5	19558	16545.5	2538.95	2615.46	13639.4	16937.8
P56581	3	3	Tdg	G/T mismatch-specific thymine DNA glycosylase	9.10962	9.72807	13.5202	8.81714	13.907	14.1546	15.3039	14.9445	15.4309	14.0553	13.9025	13.6458	13.6146	10.6553	10.7947	15.4749	15.4948	15.1015	0.869277	0.439252	0	1	1	2	1	2	3	3	3	3	2	2	2	2	1	1	3	3	3	552.42	848.09	11748.5	451.05	15361.1	18236.7
A0A2R8VI94	5	1	Cd47	Leukocyte surface antigen CD47	12.7096	9.1636	12.5773	12.6637	12.972	14.0234	16.1175	14.9431	16.1195	12.8878	13.2838	13.6123	13.8516	13.1181	14.0231	15.957	16.1574	16.1758	0.86411	0.325268	0	2	1	2	2	2	3	4	3	4	2	2	3	3	2	3	4	4	4	6698.54	573.48	6111.56	6488.74	8034.69	16651.8
Q8BTW3	6	6	Exosc6	Exosome complex component MTR3	15.9628	13.92	16.9928	16.8799	16.7206	16.3759	16.3087	13.6939	16.0891	17.087	16.7485	17.2707	17.1252	17.0144	16.9326	16.1719	16.1095	16.251	0.863009	0.0650754	0	4	3	6	6	6	5	4	3	4	6	5	6	6	6	6	4	4	4	63869.5	15500.4	130420	120600	107997	85041.4
Q8CBC4	4	4	Cnst	Consortin	8.06404	13.7786	10.4103	12.7569	13.8355	10.2835	15.1601	15.0585	14.8065	10.4842	11.0712	14.0135	14.6693	14.336	12.8235	14.1776	15.1292	15.2081	0.862082	0.410365	0	1	3	2	3	4	2	5	5	5	2	2	3	5	4	3	3	4	5	267.62	14052.6	1360.85	6921.58	14618.1	1246.38
Q9CZP5	6	6	Bcs1l	Mitochondrial chaperone BCS1	14.8752	9.24622	14.8496	14.9993	13.4839	12.9639	15.6621	15.651	14.4913	14.673	14.3501	14.8337	14.716	13.2107	15.6016	15.8953	15.467	15.2062	0.859012	0.250024	0	3	1	3	3	2	2	5	5	3	3	3	3	3	2	4	5	5	4	30053	607.28	29524.4	32752.5	11456.7	7989.47
D3Z4A3	4	4	Zfp740	Zinc finger protein 740	13.4864	12.7322	13.2115	12.9893	13.7546	14.0287	7.0321	10.408	11.8148	14.2226	14.3255	13.8621	14.0007	13.6852	13.8532	11.5764	9.96672	11.6747	0.856626	0.356367	0	3	3	3	3	4	4	1	2	3	4	4	4	4	3	4	2	2	2	11476.3	6804.26	9485.45	8131.23	13821.6	16712.8
Q8C9S4	3	3	Ccdc186	Coiled-coil domain-containing protein 186	10.7487	13.2448	13.6902	10.5018	14.3385	10.7578	13.8014	14.1243	13.8909	10.7784	14.5525	11.219	16.1884	16.3216	12.3084	14.256	12.3382	14.8405	0.856062	0.341155	0	1	2	2	1	2	1	2	2	2	1	2	1	2	2	1	2	1	3	1720.65	9706.74	13217.7	1450.01	20717.2	1731.54
P62075	5	5	Timm13	Mitochondrial import inner membrane translocase subunit Tim13	14.9101	14.3781	14.7864	9.52546	10.2893	12.3366	16.0225	16.0276	16.1513	15.7907	12.3327	14.2207	14.75	14.2542	12.7977	15.6957	16.0795	16.1988	0.85473	0.387617	0	4	3	4	1	1	2	5	5	5	5	2	3	4	3	2	4	5	5	30789.1	21293.5	28259	736.97	1251.39	5172.18
Q8K4Q6	4	4	Neil1	Endonuclease 8-like 1	12.1725	10.2173	13.7592	13.64	13.1162	9.15178	14.261	14.5035	14.008	13.2175	13.562	13.7636	12.401	13.2096	13.219	14.1075	14.3124	14.7163	0.853274	0.22223	0	2	1	3	3	3	1	4	4	4	3	3	4	2	3	3	4	4	4	4616.28	1190.43	13864.9	12766.2	8879.15	568.8
P08046	7	7	Egr1	Early growth response protein 1	13.4934	11.1868	15.6259	14.332	14.9482	14.3123	16.0982	16.1069	16.5251	15.0338	15.1238	15.6244	14.5693	15.2713	15.2553	16.2812	16.4529	16.6711	0.850474	0.179522	0	4	3	7	5	5	4	7	7	7	6	6	7	5	6	6	7	7	7	11532.6	2331.11	50565.2	20623.5	31613.1	20344
Q4G0F8	4	4	Ubn1	Ubinuclein-1	8.61901	12.6032	13.8106	13.8579	12.3526	13.8945	14.6659	14.5185	14.5333	14.0242	13.0677	14.0481	13.8814	12.8719	13.7553	14.8687	15.018	14.9655	0.84948	0.233747	0	1	2	3	3	2	3	4	4	4	3	2	3	3	2	3	4	4	4	393.17	6222.18	14368.4	14846.9	5230.02	15228.3
G3XA30	3	3	Nsmce4a	Non-structural maintenance of chromosomes element 4	13.6473	9.30044	12.9995	8.66874	13.713	13.476	13.78	13.8905	13.5787	13.7394	10.1163	13.6253	13.8425	13.9825	13.9734	13.7282	13.8499	13.8176	0.846745	0.304678	0	2	1	2	1	2	2	3	3	3	2	1	2	2	2	2	3	3	3	12830.8	630.54	8189.34	406.96	13428.1	11394.4
G3UYS3	3	3	Mettl14	N6-adenosine-methyltransferase non-catalytic subunit	13.8428	13.9458	14.2394	8.64569	14.5196	14.6545	14.8202	14.6037	14.4764	14.5559	14.5326	14.7119	14.3329	14.1267	14.6455	14.7213	14.6753	15.0618	0.8462	0.213411	0	2	2	2	1	2	3	3	3	3	2	2	2	2	2	2	3	3	3	14693.1	15780.4	19341.6	400.51	23486.7	25789.8
Q8BG26	3	1	Rusc1	AP-4 complex accessory subunit RUSC1	10.6792	14.2953	13.8414	10.6579	11.4081	14.3232	13.5949	13.6101	10.3605	14.0478	11.6564	13.7679	14.5879	14.0821	12.4995	13.9442	11.6235	14.1472	0.842882	0.234641	0	1	2	2	1	1	2	2	2	1	2	1	2	2	2	1	2	1	2	1639.69	20105.4	14678.5	1615.63	2717.49	20498.5
A0A0R4J0A8	3	3	Mbd4	Methyl-CpG-binding domain protein 4	8.91388	13.2959	13.0476	14.4556	12.8935	14.5834	12.5475	8.51183	9.54203	14.1829	10.9891	14.1749	13.6315	14.0456	10.8119	9.86265	13.9894	13.6732	0.841104	0.400868	0	1	2	2	3	2	3	2	1	1	3	1	3	2	2	1	1	2	2	482.33	10056.9	8466.68	22468.6	7608.98	24548.8
D3Z0G5	3	3	Rgs12	Regulator of G-protein signaling 12	9.68048	9.85658	11.7453	8.50486	9.28381	8.49541	12.9752	13.1927	12.2984	12.3042	9.70924	11.2349	11.9861	9.74399	9.74502	13.0422	12.7272	13.098	0.839791	0.305061	0	1	1	2	1	1	0	2	3	2	2	1	2	2	1	1	2	3	3	820.57	927.1	3433.18	363.26	623.31
Q3TEI4	7	7	#N/A	Uncharacterized protein C15orf39 homolog	14.1939	12.2733	11.7854	11.5857	11.8083	11.7971	15.0727	15.2276	15.3292	14.0431	15.225	13.554	13.6325	10.2828	14.9166	13.8699	15.1404	15.9633	0.839374	0.299531	0	5	3	3	3	3	3	6	6	6	5	6	4	4	2	6	5	7	7	18740.9	4950.17	3529.9	3073.48	3586.42	3558.67
Q8BHB9	3	2	Clic6	Chloride intracellular channel protein 6	14.9821	14.2758	13.1968	14.9497	13.7501	14.8712	12.8099	8.60541	9.95261	14.4903	14.5182	14.27	14.768	14.4309	14.3363	10.5833	13.9236	13.6207	0.838642	0.352618	0	3	2	2	3	2	3	2	1	1	3	3	2	3	2	2	1	2	3	32364.8	19836.1	9389.43	31644.5	13778.3	29969.8
B2RW07	4	4	Atxn7l1	Ataxin 7-like 1	14.0743	8.6774	13.9966	14.2095	13.9778	13.9642	12.7328	12.1842	12.685	13.473	13.3921	15.0537	13.238	13.6555	14.7255	12.7764	14.4232	13.2912	0.836316	0.211443	0	3	1	3	3	3	3	2	2	2	2	2	3	2	3	3	2	3	2	17249.5	409.41	16345	18944.7	16133.4	15981.9
A2A6T4	3	3	Mrpl58	Peptidyl-tRNA hydrolase ICT1, mitochondrial	13.8281	8.48365	14.4047	14.3814	14.6692	14.4814	13.7763	13.8555	13.6314	14.4381	14.7223	14.4904	14.4595	14.6015	14.7839	13.7779	13.9744	13.7749	0.834581	0.219044	0	2	1	3	3	3	3	2	2	2	3	2	3	3	3	3	2	2	2	14543.5	357.96	21689.8	21342.6	26053.9	22874
A0A2I3BRX7	3	3	Mettl6	tRNA N(3)-methylcytidine methyltransferase METTL6	13.7416	9.31655	14.4977	14.3527	14.0403	13.9168	14.7979	13.8211	14.2753	13.7416	14.0276	14.3754	14.7252	14.5317	14.7004	14.7267	14.5739	14.868	0.834491	0.159673	0	2	1	2	2	2	2	3	2	2	2	2	2	2	2	2	3	2	3	13697.5	637.62	23133.9	20921	16848.6	15466.1
D3YYR5	3	3	P2rx4	P2X purinoceptor 4	8.87261	12.753	13.0971	11.9567	13.3844	13.2102	14.2063	13.1001	13.6381	12.3489	12.7646	14.1627	13.9555	13.2446	11.9366	14.2311	14.3358	14.7475	0.834315	0.193525	0	1	2	3	2	3	3	4	3	3	2	2	4	4	3	2	4	4	4	468.73	6903.15	8762.14	3974.78	10692.8	9476.92
Q8K1H7	4	4	Tcp11l2	T-complex protein 11-like protein 2	9.65055	9.54174	12.1936	9.66333	9.88871	9.70776	15.1587	14.1389	13.5251	13.8866	10.23	13.0878	10.0948	10.0797	10.2193	14.7598	13.5164	15.0762	0.831333	0.436566	0	1	1	2	1	1	1	4	3	2	3	1	2	1	1	1	2	3	3	803.72	745.33	4684.25	810.87	947.98	836.23
Q9JMG1	9	9	Edf1	Endothelial differentiation-related factor 1	17.6879	16.7926	17.7279	17.4899	17.2817	17.7251	16.1172	15.3321	16.1538	17.5727	18.4089	18.069	18.1029	18.5564	17.9877	17.0292	17.0488	16.9708	0.826447	0.033848	0	8	6	8	8	9	9	5	5	5	7	8	9	8	9	9	5	5	5	211155	113525	217089	184068	159332	216667
Q9CQB5	4	4	Cisd2	CDGSH iron-sulfur domain-containing protein 2	8.6878	11.0319	12.5096	8.54272	8.72601	11.4496	14.1301	13.6966	13.541	10.8936	11.9742	9.35762	12.1622	10.6858	12.0855	14.244	14.123	14.2148	0.825033	0.399545	0	1	2	3	1	1	2	3	3	3	2	2	1	3	2	2	3	3	3	412.37	2093.83	5831.38	372.92	423.44	2796.95
Q9CV28	6	6	Mindy3	Ubiquitin carboxyl-terminal hydrolase MINDY-3	13.6247	10.4972	14.2933	14.0648	12.6192	14.5037	15.2308	14.7321	14.9938	14.3769	14.1478	14.5892	14.0864	14.2498	14.3366	15.3675	15.2707	15.4338	0.811007	0.142366	0	4	2	4	4	3	4	5	5	5	4	4	4	4	4	5	5	5	5	12631.3	1445.38	20077.1	17136.3	6291.67	23230
Q9Z2T6	3	1	Krt85	Keratin, type II cuticular Hb5	19.11	13.5479	19.472	18.9457	18.6187	18.2572	18.6195	18.4269	18.9723	18.3934	19.4085	18.7765	18.899	18.4387	18.6295	20.4966	18.9701	19.2548	0.810781	0.219554	0	3	1	2	2	2	2	2	2	2	2	2	2	2	2	2	3	2	2	565814	11976.5	727218	504928	402512	313296
Q9D9M2	3	3	Usp12	Ubiquitin carboxyl-terminal hydrolase 12	12.1339	12.2591	12.4497	8.51428	12.3854	12.511	11.712	11.618	7.86258	12.2471	12.7203	13.0702	12.3788	12.0833	12.3805	10.3541	12.8688	10.6128	0.807772	0.248636	0	2	2	2	1	2	2	2	2	1	2	2	3	2	2	2	1	3	1	4494.42	4901.89	5593.95	365.64	5350.29	5837.06
Q9EQH4	3	3	Taf8	Transcription initiation factor TFIID subunit 8	12.7071	8.77863	12.8326	12.5456	12.0576	13.5664	13.4886	13.1941	11.9596	13.4413	13.055	13.1475	12.9109	12.4162	12.4241	13.8278	13.7382	13.4134	0.804901	0.136428	0	2	0	2	2	2	2	2	2	2	3	2	2	2	2	2	3	3	2	6686.97		7294.41	5978.64	4262.79	12131.2
Q9CQR4	3	3	Acot13	Acyl-coenzyme A thioesterase 13	13.9538	8.89497	13.3382	13.9503	14.0206	13.3504	11.5493	11.367	8.49813	13.851	13.9627	13.6078	13.4022	14.1676	14.2239	10.9615	10.8964	11.09	0.80449	0.370688	0	2	1	3	2	2	2	2	2	1	3	2	3	2	2	3	2	2	2	15867.9	476.05	10356.2	15828.7	16620	10444.2
Q69Z66	3	3	Mysm1	Deubiquitinase MYSM1	12.479	9.05137	12.8155	13.1607	12.9396	13.1749	8.62443	13.2045	12.6339	10.8553	14.0674	13.2414	13.1601	11.4332	14.3062	10.4644	13.7226	14.0575	0.802688	0.320753	0	2	1	2	2	2	2	1	2	2	1	2	2	2	1	3	1	2	3	5708.72	530.56	7208.67	9157.48	7856.16	9247.72
Q3UGP8	3	3	Alg10b	Putative Dol-P-Glc:Glc(2)Man(9)GlcNAc(2)-PP-Dol alpha-1,2-glucosyltransferase	13.5174	13.4155	13.6854	13.6633	13.807	13.8858	12.7391	13.3709	8.31773	13.3386	13.9207	13.2703	13.641	13.8821	13.9877	14.0334	13.6577	13.8785	0.800888	0.197083	0	3	3	3	2	3	3	2	3	1	2	3	3	3	3	3	2	3	3	11725.8	10926.5	13173.9	12973.4	14332.5	15136.9
H3BJ67	4	3	Evi5l	Ecotropic viral integration site 5 like	13.6931	11.3271	13.7362	14.0696	13.8634	12.1425	11.5345	12.7606	13.1893	14.4882	14.5723	14.6166	12.306	14.7852	13.6633	12.2406	13.2562	13.5918	0.80044	0.112043	0	3	2	3	4	3	2	2	3	3	4	4	4	2	4	3	2	3	3	13244.1	2569.21	13645.6	17193.4	14904.2	4521.08
Q64374	3	3	Rgn	Regucalcin	14.3015	11.055	13.0487	14.4469	14.59	14.1087	8.77571	8.20972	9.12808	13.6452	14.7918	14.4953	14.3764	14.5777	14.1792	9.749	9.35492	9.68208	0.798588	0.514691	0	3	1	2	3	3	2	0	0	0	2	3	3	2	3	3	0	0	0	20192	2127.53	8473.41	22332.6	24661.7	17666.6
Q63810	3	3	Ppp3r1	Calcineurin subunit B type 1	12.7254	12.9638	13.0706	12.5692	12.9262	12.5073	15.6536	15.0207	15.9078	13.6629	13.1023	14.8978	14.5246	13.219	13.7458	15.613	15.9175	15.8414	0.797754	0.200417	0	2	2	2	2	2	2	3	3	3	3	2	4	4	2	3	3	3	3	6772.26	7988.97	8603.01	6077.33	7783.73	5821.89
Q8R0Z2	4	4	Enox2	Ecto-NOX disulfide-thiol exchanger 2	13.8736	12.8044	14.0328	12.4898	13.6188	12.1853	10.8172	14.0295	12.1971	13.3999	12.6253	13.4008	13.7913	14.3184	12.6286	14.2518	14.1569	14.6236	0.794229	0.0882633	0	3	2	4	2	3	2	2	4	3	3	2	3	3	4	2	4	4	4	15009.9	7153.17	16761.2	5751.7	12580	4657.23
A0A1B0GR54	3	3	Wrn	Bifunctional 3'-5' exonuclease/ATP-dependent helicase WRN	13.4961	13.2244	12.2793	12.9548	9.50319	13.3636	11.5162	12.5917	7.82496	13.0651	13.3879	12.574	13.2123	13.0237	12.8465	11.7494	11.9454	12.0818	0.792431	0.262453	0	3	2	3	3	1	2	2	3	1	3	2	2	3	3	3	2	2	3	11554.1	9570.58	4971	7939.06	725.68	10539.8
O88398	17	17	Avil	Advillin	11.2905	12.0343	15.3843	15.0278	15.913	14.9018	17.4438	17.0271	16.4264	14.9632	14.4519	15.2761	16.1982	16.5607	15.9925	17.1978	15.9467	15.9556	0.78821	0.312879	0	4	5	10	9	11	10	18	15	16	9	8	11	14	14	13	17	15	15	2504.77	4194.43	42768.8	33405.9	61699.4	30612.8
Q9D9V3	6	6	Echdc1	Ethylmalonyl-CoA decarboxylase	14.4445	13.3536	15.5696	13.4671	14.6341	14.5034	13.9304	13.5315	13.4182	15.8212	14.4581	15.0824	14.9753	16.0494	14.0273	14.0423	14.8564	14.6285	0.787604	0.0355451	0	5	3	6	3	5	4	3	3	3	6	4	5	5	6	3	3	5	4	22295.4	10467.4	48632.2	11324.3	25427.9	23225.2
D3YZB2	5	4	Synj2	Synaptojanin-2	13.7168	9.35707	14.6691	14.2044	13.9609	12.0008	14.9738	14.5707	14.5811	14.7489	12.7121	14.4176	14.4802	14.1619	14.1988	14.7759	14.7351	14.8634	0.784352	0.238198	0	3	1	3	3	3	2	4	4	4	4	2	3	4	3	3	4	5	4	13463.7	655.78	26051.8	18877.3	15946.1	4098.39
Q8VDT9	4	4	Mrpl50	39S ribosomal protein L50, mitochondrial	9.55424	9.97022	13.7028	8.80671	14.6277	12.1387	15.5219	15.0103	15.3425	14.1287	10.3758	13.8086	9.93767	13.8821	13.5518	15.23	15.5981	15.2128	0.783381	0.496438	0	1	1	3	1	4	2	4	4	4	3	1	2	1	2	2	3	4	3	751.82	1003.08	13333.4	447.8	25315.2	4509.49
Q9CXD6	4	4	Mcur1	Mitochondrial calcium uniporter regulator 1	12.0202	13.7971	14.2161	11.8429	12.2712	14.1376	14.325	13.9804	13.9473	14.1463	14.3382	13.8834	14.0331	14.0334	14.2281	14.298	14.3481	14.2571	0.780895	0.0388378	0	2	3	4	2	2	3	3	3	4	3	3	3	3	3	3	3	3	4	4153.81	14234	19031.2	3673.33	4943.23	18023.3
E9QNB8	3	3	Kmt5a	N-lysine methyltransferase KMT5A	8.69676	9.01628	12.3253	8.40246	12.1939	9.06722	13.8683	13.503	13.5507	13.2313	9.7964	13.0818	9.38625	12.9229	9.60251	12.9402	13.2962	13.3887	0.780274	0.437291	0	1	1	2	1	2	1	3	3	3	2	1	2	1	2	1	2	3	3	414.94	517.81	5131.87	338.37	4685.18	536.42
Q9Z0M5	5	5	Lipa	Lysosomal acid lipase/cholesteryl ester hydrolase	8.3853	11.4448	14.4196	14.0774	14.2767	14.6609	15.0253	15.1373	14.7873	14.3292	14.2546	12.3284	14.6254	14.6259	13.7247	15.4134	15.1666	14.7604	0.779346	0.347732	0	1	2	4	4	4	4	4	4	4	5	3	2	4	5	3	4	4	5	334.37	2787.49	21914.1	17287.1	19847.7	25903.5
Q3TPJ7	4	4	Midn	Midnolin	11.6196	11.9842	8.83086	11.7486	11.5181	9.49009	12.1255	8.03304	11.0736	12.1459	12.7655	9.88319	10.2933	10.2207	12.0864	10.461	12.079	13.4988	0.778916	0.259647	0	2	2	1	2	2	1	2	1	2	2	2	1	1	1	2	1	2	2	3146.68	4051.4	455.36	3440.92	2932.87	719.12
Q8R2Q8	4	4	Bst2	Bone marrow stromal antigen 2	13.6785	13.7838	14.543	14.4969	14.3389	12.8735	17.5735	16.5431	17.1513	14.6164	15.8837	14.4935	14.4932	14.4551	15.7252	16.1883	18.0807	18.0552	0.778755	0.307799	0	2	2	3	3	3	2	6	5	5	3	4	3	3	3	5	4	6	6	13111.5	14104.1	23871.3	23120.8	20721.7	7504.53
Q3U7U3	3	3	Fbxo7	F-box only protein 7	14.1559	13.068	13.3992	13.5516	13.9871	13.3368	8.23496	6.94416	8.44025	13.5502	12.861	13.6209	13.1328	13.6263	13.9304	11.3732	11.1255	8.90295	0.778384	0.49549	0	3	3	3	3	3	3	1	1	1	3	2	3	3	3	3	2	2	1	18253.7	8587.33	10803.1	12007	16237.8	10346.3
P22005	5	5	Penk	Proenkephalin-A	15.0872	15.426	14.0257	14.7544	14.0069	14.5561	7.84361	14.055	13.7638	15.2921	14.8118	14.3378	14.8489	14.2137	13.6962	14.4191	14.2113	14.6738	0.776233	0.330613	0	4	4	3	4	3	5	1	5	3	5	4	4	4	3	3	5	4	5	34809.7	44024	16678.1	27637.8	16462.1	24090
Q921W0	7	7	Chmp1a	Charged multivesicular body protein 1a	12.0911	12.8004	16.7545	16.0244	16.5373	16.0086	16.4196	15.9498	16.136	16.0571	15.7997	16.3768	16.5111	16.1885	15.5978	16.2809	16.4346	16.4576	0.775825	0.200204	0	3	3	7	5	6	5	5	5	5	5	6	7	7	5	5	5	5	5	4363	7133.41	110560	66653	95110.4	65928
Q3UDW8	4	4	Hgsnat	Heparan-alpha-glucosaminide N-acetyltransferase	13.6562	10.4344	14.4738	13.8464	10.4867	14.3079	15.1215	14.6827	14.9731	14.5392	13.5712	14.3284	14.0708	13.1068	13.908	15.2721	14.9684	15.1957	0.775329	0.253163	0	4	2	5	4	2	4	5	5	5	4	3	4	5	3	3	5	5	5	12910.1	1383.8	22753.6	14729	1434.85	20282.1
P51569	7	7	Gla	Alpha-galactosidase A	15.6374	15.5098	15.835	15.5055	15.0399	15.2809	13.2196	14.1491	11.3029	15.6468	15.7224	15.9405	15.6537	15.6181	15.3937	14.2141	14.7764	15.4741	0.773299	0.164169	0	6	5	8	5	5	8	5	5	3	6	7	8	7	7	7	5	5	6	50969.7	46655.7	58454.1	46518.2	33687.1	39811.7
F8VQE9	7	6	Agap3	Arf-GAP with GTPase, ANK repeat and PH domain-containing protein 3	10.6956	13.3799	14.5256	14.0569	13.8645	11.0132	14.075	14.1678	14.7717	14.3767	13.8326	13.934	13.9025	14.0227	13.6628	14.5036	14.6933	14.5344	0.768066	0.153636	0	2	3	6	4	4	2	4	5	6	5	4	4	4	4	4	4	7	5	1658.44	10659.9	23584.6	17042.7	14914.9	2066.85
Q8CG64	4	4	Fkrp	Ribitol 5-phosphate transferase FKRP	8.62176	8.77863	9.90411	8.35652	10.485	7.69711	14.0499	13.2198	13.4375	9.08562	13.1418	9.23244	9.43981	7.90147	9.38718	14.3669	14.5071	14.3969	0.767654	0.540454	0	0	0	2	0	2	1	4	3	3	0	3	1	1	1	0	4	4	4			958.15		1433.22	207.52
A0A0M3HEP3	4	4	Lias	Lipoyl synthase, mitochondrial	12.606	9.99383	14.5137	14.0625	12.7244	14.2889	14.5855	14.7879	14.6505	14.3897	14.5416	14.4421	14.0082	13.3042	14.0503	15.0484	14.8527	14.484	0.767556	0.182766	0	2	1	3	3	2	3	4	4	4	3	3	3	3	2	3	4	4	3	6234.16	1019.63	23391.3	17109.9	6767.46	20015.8
P50295	4	4	Nat2	Arylamine N-acetyltransferase 2	12.7017	10.746	14.5844	14.5899	13.0317	15.2777	15.6274	15.8861	14.8954	15.1669	13.2181	15.3146	14.6397	14.5153	14.6294	15.7444	15.7602	15.228	0.76402	0.232265	0	2	1	3	3	2	4	5	5	4	4	2	4	3	3	3	5	5	4	6661.85	1717.39	24566.2	24660.5	8374.2	39724.5
A0A1Y7VN70	4	4	Glrx5	Glutaredoxin-related protein 5, mitochondrial	9.25578	9.22335	10.7156	8.90518	11.456	8.30442	14.1842	13.7137	14.5141	9.32946	9.83248	12.0424	9.33468	12.2322	9.91728	14.9534	14.8761	14.6222	0.763099	0.515785	0	1	1	2	1	2	1	4	4	4	1	1	2	1	2	1	4	4	4	611.32	597.73	1681.59	479.43	2809.25	316.14
Q3UPE3	4	4	Rmi2	RecQ-mediated genome instability protein 2	13.3445	13.8851	12.5459	12.8256	13.4763	13.0898	13.426	11.9524	13.0467	13.0634	13.8349	13.0915	13.277	13.3003	13.3557	15.0125	15.3226	14.1999	0.762847	0.0393543	0	2	2	2	2	2	2	3	2	2	2	2	2	2	2	2	3	3	3	10401.2	15129.4	5980.04	7259.05	11396.3	8717.97
Q3UTB2	4	4	A630001G21Rik	RIKEN cDNA A630001G21 gene	13.0444	10.8822	11.6716	12.9525	8.80645	8.49541	13.2731	13.5578	13.4675	9.08562	12.9321	12.2624	13.3366	13.0125	12.8715	13.446	13.5513	12.5085	0.761729	0.35796	0	3	2	2	3	1	0	3	3	3	0	3	2	4	3	3	3	3	2	8448.22	1887.46	3262.11	7926.82	447.72
Q80TJ7	14	13	Phf8	Histone lysine demethylase PHF8	14.2835	11.0948	15.9578	15.3718	15.4264	15.8982	16.6071	16.3506	16.2178	14.9659	15.3044	15.9115	15.5802	15.7176	15.6992	16.7918	16.8742	17.2041	0.760113	0.239788	0	6	3	7	7	7	8	10	10	10	6	7	9	7	8	9	11	11	11	19942.1	2187.03	63645.4	42401.1	44037	61072.6
Q8BGA5	12	12	Krr1	KRR1 small subunit processome component homolog	17.0974	16.7692	16.7983	16.8383	17.1924	17.0987	15.3562	14.9216	16.7552	16.6725	17.8038	17.5235	17.418	17.7135	17.7045	16.914	16.8309	17.0677	0.757889	0.0252677	0	11	9	10	10	12	11	6	6	7	9	12	12	11	12	12	7	7	7	140226	111693	113971	117173	149766	140355
P97825	3	3	Jpt1	Jupiter microtubule associated homolog 1	17.0328	16.4357	17.3696	16.8956	16.195	14.8798	10.5314	9.16458	10.5323	17.1291	17.0344	16.0209	16.3127	16.6564	12.6528	13.767	11.7091	14.5593	0.75609	0.56471	0	2	2	3	2	2	2	1	1	1	3	3	2	3	2	1	2	2	2	134085	88639.8	169349	121921	75020.7	30148.7
A2AFG7	4	4	L1cam	Neural cell adhesion molecule L1	8.62176	9.66176	9.12114	8.35652	8.97386	9.02048	13.8287	13.314	13.3882	9.35916	9.60509	9.05355	12.7733	9.23096	9.26165	13.6379	13.8099	14.3009	0.749543	0.501644	0	0	1	1	0	0	1	3	3	3	1	0	1	2	1	1	3	3	3		809.99	556.85			519.32
P53798	4	4	Fdft1	Squalene synthase	12.1417	12.0439	13.2693	11.8451	11.339	10.743	15.213	15.3423	15.3423	12.4409	12.5207	13.5411	13.3371	11.9888	14.1294	15.6021	15.3244	15.1228	0.747496	0.338021	0	2	2	3	2	2	2	4	4	4	2	2	3	3	2	3	3	3	3	4518.74	4222.67	9873.14	3679.1	2590.53	1713.86
Q6ZWZ4	12	12	Rpl36	60S ribosomal protein L36	20.4587	19.444	20.1837	20.0985	20.5326	20.5416	16.6415	15.9495	18.1777	20.4683	21.1019	19.6236	20.4191	21.1911	20.9468	18.2195	18.1627	18.6201	0.747268	0.31541	0	11	10	11	11	11	11	6	6	9	11	11	10	11	11	11	9	8	10	1.4411e+06	713209	1.191e+06	1122647	1.51681e+06	1.52625e+06
Q8C9X6	6	6	Epc1	Enhancer of polycomb homolog 1	14.0061	14.1191	9.93041	14.2038	14.1113	12.7322	14.9472	14.4983	14.5115	14.3607	14.2416	14.2975	14.1824	14.1498	13.9787	14.8703	14.8731	14.8281	0.746939	0.171839	0	4	4	2	4	4	3	6	4	4	4	4	4	4	4	4	6	6	6	16453.3	17794.1	975.78	18869.4	17698.2	6804.07
Q9D4I9	3	3	Rab23	RAB23, member RAS oncogene family	12.6733	8.56925	13.5208	13.0174	13.4408	12.7782	13.5173	13.4098	13.2285	13.6041	12.7689	13.5249	13.2325	13.3785	13.522	13.5903	13.649	13.5843	0.744332	0.181754	0	2	1	3	2	3	2	3	2	2	3	2	3	3	3	3	3	2	2	6532.05	379.84	11753.8	8291.5	11119.4	7024.59
Q6PCQ0	6	6	Iqce	IQ domain-containing protein E	8.65001	11.2065	9.02253	11.3555	12.2199	10.6119	14.3801	14.3743	14.4014	11.341	11.9135	9.27428	14.5025	11.0014	12.7178	13.4542	14.3285	14.3825	0.743745	0.4486	0	1	3	2	3	4	3	7	7	7	3	3	2	7	3	5	6	7	6	401.71	2363.1	520.06	2620.28	4770.4	1564.95
P00920	6	6	Ca2	Carbonic anhydrase 2	8.62176	8.77863	6.79779	11.4831	11.9794	9.73655	15.0284	13.9825	15.6614	9.08562	9.48363	10.1741	10.1631	12.4724	12.8685	16.1199	14.9863	13.3589	0.738117	0.586114	0	0	0	1	3	3	2	6	4	6	0	1	2	2	3	4	6	6	4			111.26	2862.49	4037.86	853.09
A0A0R4J0G9	5	5	Mtrr	Methionine synthase reductase	14.3512	10.6213	13.062	13.1935	14.7722	14.6872	14.3478	15.3819	15.2286	14.2268	14.5004	15.1439	14.4836	14.6244	14.7117	14.8066	14.5184	15.2693	0.737715	0.165398	0	3	2	2	2	3	3	3	4	4	3	3	4	3	3	3	3	3	4	20900.1	1575.21	8551.51	9368.14	27981.1	26379.9
P14115	10	10	Rpl27a	60S ribosomal protein L27a	19.5648	18.4307	19.5977	19.3165	19.6377	20.507	14.0955	12.9703	13.9132	19.4103	19.8572	19.3177	19.9126	20.3796	19.5098	14.0072	15.8343	16.3979	0.732599	0.566155	0	10	9	11	10	10	11	6	5	5	10	10	10	11	11	10	5	6	7	775541	353340	793418	652900	815688	1.49014e+06
Q9D0D4	9	9	Dimt1	Probable dimethyladenosine transferase	12.6299	12.5021	15.7813	14.7462	14.2311	14.0711	15.7478	15.2487	15.7846	15.3502	14.849	15.0185	14.8694	14.3715	14.61	15.9051	16.2117	16.1257	0.729809	0.15123	0	4	4	10	7	6	5	9	8	9	8	7	7	7	6	7	9	10	9	6338.47	5801.17	56319.6	27481.3	19230.6	17212.2
F6TVX7	6	6	Gm20671	Phosphatidylserine decarboxylase proenzyme, mitochondrial	15.5183	14.7439	14.5823	14.8003	15.2303	14.995	11.9999	11.5786	12.3592	14.6513	16.1168	15.6847	15.669	15.8842	15.8984	12.9597	12.7294	12.7666	0.728021	0.320468	0	6	4	5	5	6	6	3	3	3	5	6	6	6	6	6	3	3	3	46933.7	27438.8	24530	28531.3	38440.7	32654.8
P01887	6	6	B2m	Beta-2-microglobulin	16.0057	15.6569	18.8217	17.7027	17.498	17.6329	19.8949	19.4864	19.1353	19.0172	18.1244	18.8089	18.8027	17.6351	17.4715	19.3086	19.299	19.8549	0.720872	0.219059	0	3	3	6	4	4	5	6	6	5	6	5	6	6	5	5	4	5	6	65794.3	51666.2	463346	213331	185102	203253
Q9Z1R4	3	3	D17h6s53e	Uncharacterized protein C6orf47 homolog	11.5255	12.165	13.1351	8.2758	8.92151	8.19992	13.9813	13.7525	14.0365	9.19673	9.15909	12.7195	12.6723	12.4869	12.6147	13.9051	13.9532	13.7681	0.72028	0.493588	0	2	2	3	1	1	1	3	3	3	1	1	2	2	2	2	3	3	3	2948	4592.34	8996.34	309.93	484.89	294.05
Q64281	4	4	Lilrb4a	Leukocyte immunoglobulin-like receptor subfamily B member 4A	8.62176	8.77863	8.30366	8.35652	10.5634	9.67311	14.8677	14.4008	14.655	9.08562	9.60509	10.1612	10.2008	10.3348	10.234	15.4615	14.7145	14.9023	0.719902	0.584688	0	0	0	0	0	1	1	4	3	3	0	0	1	1	1	1	4	4	3					1513.24	816.39
P15327	4	4	Bpgm	Bisphosphoglycerate mutase	14.3201	9.07604	14.656	14.4502	14.6286	14.3109	14.4806	14.3404	13.8706	14.6695	14.5166	14.8578	14.6432	14.4531	14.6816	14.1938	14.2054	14.3479	0.715033	0.250264	0	3	1	4	4	4	3	4	4	4	4	4	4	4	4	4	4	4	4	20453.7	539.71	25815.6	22384.5	25330.3	20324.3
Q6IFZ6	9	2	Krt77	Keratin, type II cytoskeletal 1b	17.2545	13.3918	19.4508	17.572	16.9671	15.637	15.6945	15.7922	17.2146	15.5916	21.7155	16.9706	15.2174	17.2444	16.3719	18.0095	17.5576	16.7289	0.714758	0.409598	0	6	3	7	6	6	4	4	5	5	4	8	6	3	6	5	5	6	6	156360	10747.9	716616	194852	128120	50958.4
P20108	8	8	Prdx3	Thioredoxin-dependent peroxide reductase, mitochondrial	17.953	16.8336	18.0608	17.5497	18.0829	17.9148	16.0886	12.3737	15.9997	17.8172	17.9718	17.9161	17.7227	18.4978	17.798	16.8179	16.6611	15.997	0.704758	0.307206	0	7	5	8	7	7	7	4	3	4	7	7	7	6	8	7	5	5	4	253746	116796	273434	191864	277644	247103
Q8K0C1	5	5	Ipo13	Importin-13	13.6353	10.9321	13.8613	12.4266	12.6496	13.8044	14.7064	14.5462	14.789	13.9717	13.9635	13.9467	13.6936	13.7372	14.202	14.931	14.7118	14.5058	0.701368	0.137011	0	4	2	5	3	3	4	6	5	6	5	4	5	4	4	5	6	6	6	12724.5	1953.86	14882.2	5505.37	6425.68	14306.3
A0A2R8VHX0	4	4	Csad	Cysteine sulfinic acid decarboxylase	14.8799	11.9486	14.8035	14.9556	14.7701	14.7965	13.0048	11.4103	11.4737	15.2367	15.4464	13.9812	15.3382	15.2994	14.0682	12.2481	13.3583	13.3719	0.700592	0.297523	0	4	2	4	4	4	4	3	2	2	4	4	3	4	4	3	2	3	3	30150.1	3952.6	28595.7	31775.1	27941.4	28456.2
B0V3P3	5	5	Ap4b1	AP-4 complex subunit beta-1	10.5774	9.95839	10.7828	12.9647	12.1234	12.4667	13.6397	13.1032	13.9989	13.2346	10.0291	12.8653	12.8922	13.0082	12.9034	13.5944	13.4629	13.9276	0.700299	0.266759	0	2	1	2	3	3	3	4	3	4	3	1	4	3	4	4	4	4	5	1528	994.89	1761.77	7993.78	4461.79	5660.64
A0A087WSP0	4	1	Dst	Microtubule-actin cross-linking factor 1, isoforms 1/2/3/4	13.0355	8.77863	12.2176	12.5391	13.644	12.2927	13.935	14.0592	13.2172	13.6646	9.60509	14.215	13.4531	14.2605	14.4694	12.6956	13.2794	14.3516	0.697249	0.356371	0	2	0	2	2	3	2	3	3	3	3	0	4	3	4	4	2	3	4	8396.31		4762.78	5951.68	12801.1	5017.21
A0A5F8MQ39	4	1	Kat6b	Histone acetyltransferase KAT6A	14.1404	13.6793	14.0104	14.1307	14.1057	13.796	10.5115	10.4418	10.8189	14.4658	14.3485	14.0108	14.3068	14.5674	14.7114	11.6223	11.7791	12.0923	0.696627	0.344523	0	4	4	3	4	4	4	2	2	2	4	4	3	4	4	4	2	3	2	18058.9	13118	16502.8	17937.5	17629.3	14223.3
H3BJY3	3	1	Abr	Active breakpoint cluster region-related protein	9.47367	9.64884	13.3048	8.84511	12.3917	13.04	13.913	13.6745	13.876	12.6011	10.0061	12.7309	13.0257	13.0077	12.1774	13.727	13.3904	13.7685	0.69634	0.392453	0	1	1	3	1	2	2	3	3	3	2	1	3	3	3	2	3	3	3	710.98	802.77	10119.2	459.88	5373.67	8422.59
A2AFK4	3	3	Mtg2	Mitochondrial ribosome associated GTPase 2	12.5301	9.65632	12.4142	8.7341	12.9571	12.9562	12.0705	12.5767	12.6779	12.8123	12.5855	12.4569	13.1355	12.7808	12.4519	12.1786	12.1498	12.2863	0.69606	0.203712	0	2	1	3	1	3	3	2	3	2	3	2	3	3	2	2	3	2	3	5914.57	806.94	5458.26	425.82	7951.92	7946.76
Q9ES61	3	3	Ms4a4b	Chandra protein	9.58062	9.99673	9.08351	12.9822	9.71992	12.6271	16.0139	15.165	15.6382	12.3157	12.5498	9.52099	12.8054	13.3909	12.5275	15.6243	14.5166	13.8106	0.694961	0.5349	0	1	1	1	2	1	2	3	3	3	2	2	1	2	3	2	3	3	3	765.69	1021.68	542.51	8091.69	843.31	6325.98
P41105	14	14	Rpl28	60S ribosomal protein L28	20.6327	19.5152	21.0082	20.5935	21.0358	21.0245	17.3207	18.5124	17.4713	20.9877	21.4327	21.0321	20.981	21.4206	21.3934	18.5058	18.8453	18.764	0.694258	0.312006	0	14	12	13	12	14	14	7	8	8	13	14	14	13	14	14	9	9	8	1.62581e+06	749332	2.10917e+06	1.5822e+06	2.14991e+06	2133105
A2AJ88	6	6	Pnpla7	Patatin-like phospholipase domain-containing protein 7	12.2368	9.54761	13.8966	12.714	13.6025	13.4685	14.9001	14.2775	14.293	12.6079	13.4867	13.8737	13.4149	13.658	13.9059	15.0193	14.5408	14.6723	0.693641	0.255083	0	3	2	5	3	4	4	5	4	5	3	4	4	4	4	5	6	6	5	4826.67	748.37	15250.8	6719.06	12438.4	11334.7
A0A1L1SQR4	4	2	Dock6	Dedicator of cytokinesis protein 6	11.1283	14.1336	14.3436	13.8941	13.9024	10.9994	14.8012	14.5861	14.4455	12.0942	14.0885	14.1242	13.9153	13.9124	14.199	15.3243	15.2757	15.498	0.688607	0.265949	0	2	4	4	4	4	2	4	4	4	2	4	4	3	4	4	4	4	4	2238.53	17974.1	20790.6	15224.6	15312.5	2047.18
Q9JKL4	4	4	Ndufaf3	NADH dehydrogenase [ubiquinone] 1 alpha subcomplex assembly factor 3	12.4647	12.4166	13.8784	12.0618	13.4627	13.3276	16.0027	15.4006	15.4183	13.8766	13.5445	13.7865	13.7039	13.7738	13.7743	16.0939	16.0205	16.0404	0.686768	0.285489	0	2	2	3	2	3	3	3	3	3	3	3	3	3	3	3	3	3	3	5652.79	5467.12	15059.4	4275.21	11289.9	10280.4
Q8K2P7	4	4	Slc38a1	Sodium-coupled neutral amino acid symporter 1	13.5268	13.3878	14.3832	13.5435	16.6335	14.9359	15.8284	15.7382	16.3193	14.4385	14.8449	14.4092	13.9056	16.6966	17.2618	16.3522	16.4989	16.0613	0.685817	0.258021	0	2	2	2	2	4	3	3	3	3	3	3	2	2	4	4	2	3	3	11802.2	10718.7	21369.1	11939.7	101668	31344.6
Q60648	6	6	Gm2a	Ganglioside GM2 activator	18.1399	16.2702	18.4704	18.2472	17.972	18.5055	18.0075	17.6158	12.5929	17.7505	18.0938	18.4719	17.4269	17.9768	17.9257	17.9705	17.9181	18.4558	0.685384	0.300456	0	6	5	7	6	6	6	5	6	3	4	6	7	5	6	6	5	5	6	288837	79032.3	363198	311133	257110	372147
Q3UER8	3	3	Fgg	Fibrinogen gamma chain	15.2485	8.79367	15.0043	14.7886	14.6309	15.2375	13.4907	13.2878	14.3153	14.979	15.2306	14.9719	14.351	15.3658	15.2113	13.1847	13.616	14.0359	0.683214	0.360348	0	3	1	3	3	2	3	2	2	3	3	3	3	2	3	3	2	2	2	38928.1	443.77	32866.3	28302	25371	38631.1
A2RTL5	5	5	Rsrc2	Arginine/serine-rich coiled-coil protein 2	14.422	12.6349	15.3986	14.8275	14.5888	14.3346	14.0827	13.236	11.3899	15.1848	14.5428	15.1955	14.5793	14.4679	14.6283	13.8953	13.9737	14.575	0.680833	0.142232	0	3	2	5	4	3	3	3	3	2	5	3	5	3	3	3	3	3	4	21950.9	6360.58	43195.5	29074.7	24641.6	20661.4
Q811J3	6	5	Ireb2	Iron-responsive element-binding protein 2	14.7261	13.3439	14.344	14.2056	12.8459	13.0545	14.598	14.0338	14.6398	14.6938	13.7606	14.4017	14.7643	14.0413	14.3818	15.4837	15.2678	15.1185	0.68022	0.0406076	0	4	3	4	4	3	3	5	5	5	4	3	4	5	4	5	6	6	6	27101.2	10397	20795.7	18893.3	7361.95	8507.62
Q8BX80	5	5	Engase	Cytosolic endo-beta-N-acetylglucosaminidase	14.0497	10.9905	14.1687	10.3413	14.617	14.4839	14.4869	14.1561	14.2492	13.6416	14.4783	14.1633	13.8816	14.2999	14.1187	14.5196	14.3122	14.2367	0.678699	0.235514	0	4	2	4	2	4	4	5	5	5	3	4	4	3	4	4	5	5	5	16958.5	2034.6	18416.4	1297.3	25128.2	22914.1
Q9JHL0	3	3	Lat2	Linker for activation of T-cells family member 2	8.62176	8.77863	8.30366	8.35652	8.97386	8.49541	13.5465	13.3276	14.117	9.68898	9.60509	9.69632	9.47488	10.0477	10.1457	14.2499	13.1128	12.6056	0.678459	0.526608	0	0	0	0	0	0	0	3	3	3	1	0	1	0	1	1	3	3	2
Q91UZ1	5	5	Plcb4	1-phosphatidylinositol 4,5-bisphosphate phosphodiesterase	8.52125	8.77831	12.1108	11.0359	11.023	10.7603	12.947	13.9837	13.1604	11.0401	9.13807	13.9267	13.1148	10.4855	11.3614	11.1391	14.0691	14.1406	0.677192	0.449196	0	1	1	3	2	2	2	4	5	4	2	1	5	4	2	2	2	4	4	367.41	439.07	4422.97	2099.65	2080.93	1734.45
Q9CQD1	5	1	Rab5a	Ras-related protein Rab-5C	11.9688	12.2074	15.4348	13.6199	14.5392	14.8567	17.5729	16.7263	16.7529	14.0841	12.4195	15.1187	14.8479	14.9863	14.9321	17.3383	17.6945	18.3281	0.674526	0.472942	0	2	2	4	3	4	4	6	6	5	3	2	4	4	4	4	6	7	7	4008.29	4729.14	44292.9	12589.5	23808.7	29668.9
Q9D600	7	7	Gins2	DNA replication complex GINS protein PSF2	13.2997	10.7582	14.2754	13.4802	14.3014	14.432	14.3127	13.2329	14.6388	13.1755	13.9663	14.1885	14.202	14.2814	13.9496	12.8869	16.0052	16.1441	0.674237	0.233569	0	3	2	5	3	4	5	5	3	5	3	4	4	5	5	4	3	6	6	10083.2	1732	19830.5	11427.1	20191	22104.3
O55013	5	5	Trappc3	Trafficking protein particle complex subunit 3	14.3626	12.3444	14.7775	14.3467	14.6912	14.7582	15.2032	14.9844	14.722	14.9547	13.3604	15.4727	14.8468	14.9227	15.2659	15.6146	15.8374	15.9807	0.67397	0.0969022	0	4	3	5	4	5	5	5	6	4	4	3	6	5	5	6	5	4	4	21065.8	5200.37	28085.7	20834.7	26454.5	27711.8
Q9D486	4	4	Cmip	C-Maf-inducing protein	7.98328	10.6749	12.7088	7.76699	8.14318	11.2493	14.5728	14.7051	14.3175	11.7342	11.1539	11.4094	12.5784	8.85518	8.87771	15.3722	13.9024	14.2997	0.673471	0.591013	0	1	2	3	1	1	2	4	4	4	2	2	2	3	1	1	4	3	4	253.05	1634.77	6694.69	217.82	282.71	2434.37
Q9DAU1	4	4	Cnpy3	Protein canopy homolog 3	11.4425	14.2542	10.9458	11.114	14.3362	11.0484	15.8152	15.2797	15.5211	15.2731	12.3556	13.7462	13.6982	9.40676	15.2322	15.8339	14.0937	16.1685	0.672345	0.508536	0	2	3	2	2	3	2	3	3	4	4	2	3	3	1	4	4	3	4	2783.08	19540.2	1972.53	2216.36	20683	2117.94
Q8R216	3	3	Sirt4	NAD-dependent protein lipoamidase sirtuin-4, mitochondrial	13.031	13.3338	12.7173	13.7885	12.3201	8.66484	8.77571	12.8083	12.5288	13.2312	11.1215	13.0589	13.5856	13.187	13.2948	12.8724	12.5214	11.1454	0.672198	0.355003	0	2	2	2	3	2	1	0	2	2	2	1	2	3	2	2	2	2	1	8369.7	10324.9	6734.19	14149.8	5113.69	405.86
A2A9W3	4	4	Mif4gd	MIF4G domain-containing protein	15.1828	14.7375	15.0375	15.2139	13.9677	14.5288	15.4952	12.2588	14.6479	15.5523	14.4838	15.3024	15.214	15.2147	14.9086	15.8655	14.7637	15.7817	0.668533	0.0813457	0	3	2	3	3	2	2	4	2	3	3	2	3	3	3	3	4	3	5	37193.8	27317.2	33630.6	38004.4	16021.5	23637
P04104	8	3	Krt1	Keratin, type II cytoskeletal 1	18.2979	15.3156	19.6967	18.7511	17.9651	17.1209	16.531	16.8378	18.2333	17.0529	21.4151	17.9772	17.9085	17.8344	17.5758	19.1998	18.5114	17.2855	0.667918	0.300385	0	7	4	8	8	7	7	6	7	7	6	9	7	6	7	7	7	8	7	322262	40781.9	849736	441211	255886	142533
P62858	8	8	Rps28	40S ribosomal protein S28	18.3893	16.3047	19.0125	18.6012	18.5409	18.895	13.2496	11.8247	13.1956	18.9308	18.5368	18.5632	18.4359	18.8659	18.7927	14.0091	13.156	14.7182	0.666119	0.603274	0	8	6	7	7	8	7	4	3	3	7	7	7	8	8	7	4	4	4	343348	80947.7	528846	397666	381401	487476
A0A0R4J0L8	3	3	Ccdc174	Coiled-coil domain-containing protein 174	13.1721	13.8702	13.583	14.0295	13.5643	7.74409	13.8504	13.6467	13.8081	13.3489	13.785	13.4031	13.6044	13.5191	13.6311	13.941	14.1377	13.8444	0.660708	0.339692	0	2	3	3	3	3	1	2	2	2	3	3	2	3	2	3	2	2	2	9229.62	14973.8	12271.5	16722.9	12113	214.39
O35615	7	7	Zfpm1	Zinc finger protein ZFPM1	12.1238	12.1695	12.2174	11.5419	8.801	13.7982	15.3393	15.0631	15.7503	12.9063	11.9498	12.5888	14.252	12.2832	14.5748	15.8504	15.324	13.0141	0.659871	0.46304	0	3	3	3	3	1	5	7	6	7	3	3	3	5	3	4	7	7	4	4462.97	4606.78	4762.23	2981.68	446.03	14245.3
A0A0R4J247	4	4	Sla	Src-like-adapter	11.3679	11.5065	11.1823	11.4145	11.4746	11.4673	15.011	14.9709	14.9846	12.8808	12.64	11.6281	11.9666	11.7924	11.7908	15.2851	15.5593	15.7725	0.659547	0.443259	0	2	2	2	2	2	2	4	4	4	3	3	2	2	2	2	4	4	4	2642.89	2909.46	2323.92	2729.7	2845.8	2831.45
E9Q3V0	3	3	Slc6a9	Sodium- and chloride-dependent glycine transporter 1	8.62176	8.77863	12.792	12.1661	11.9163	8.7127	14.2835	14.3596	12.7097	12.7106	9.76484	9.49315	12.7122	13.0058	9.97774	14.2421	14.0408	14.3165	0.658142	0.526632	0	0	0	2	2	2	1	3	3	2	2	1	1	2	2	1	3	3	3			7092.22	4595.88	3865.2	419.55
Q3TAA8	3	3	Pigu	Phosphatidylinositol glycan anchor biosynthesis class U protein	13.8715	9.46763	13.4362	13.1886	13.5152	13.4579	12.1247	12.7545	12.3171	13.6371	13.5439	13.5867	13.7781	13.7201	13.8838	12.6956	12.642	12.558	0.656874	0.190903	0	4	1	4	3	4	4	3	3	3	4	4	4	4	4	4	4	3	3	14988.1	708.01	11084	9336.26	11707.7	11252.3
Q5SVW9	4	4	Tmed4	Transmembrane emp24 domain-containing protein 4	16.0223	16.2927	16.1307	15.9167	16.121	15.9547	13.9374	16.1465	15.5453	16.589	16.553	16.5215	16.5229	16.4703	16.6973	16.0682	16.0372	16.5079	0.655534	0.0197674	0	4	4	4	4	4	4	2	3	3	4	4	4	4	4	4	3	3	3	66557.1	80279.6	71752.8	61860.3	71268.9	63510.6
P01898	5	1	H2-Q10	H-2 class I histocompatibility antigen, Q10 alpha chain	17.0418	13.7989	16.1707	15.5909	16.1041	17.4068	17.3295	17.2411	17.1583	17.0571	17.4281	17.0425	17.2015	17.1304	17.1994	17.2022	16.8963	16.5525	0.652	0.123949	0	4	2	3	3	3	5	4	4	4	4	4	4	5	4	4	3	4	3	134923	14252	73765.2	49355.9	70437.5	173769
Q3ULB5	4	4	Pak6	Serine/threonine-protein kinase PAK 6	8.62176	8.77863	8.30366	9.4663	8.97386	8.49541	14.0788	14.4348	14.0223	9.08562	12.2337	10.2514	10.2346	10.3891	10.3645	14.6612	13.6754	10.1428	0.651424	0.562441	0	0	0	0	1	0	0	4	4	4	0	2	1	1	1	1	4	3	1				707.36
Q6NXH2	3	3	Manea	Glycoprotein endo-alpha-1,2-mannosidase	8.2651	8.77863	14.5941	14.6245	13.99	13.5439	15.0093	15.0601	14.6333	8.63241	14.1428	14.5841	14.046	14.3776	14.3284	14.8548	14.7021	14.6865	0.650638	0.564865	0	1	0	3	3	2	2	3	3	3	1	2	3	2	3	3	3	3	3	307.64		24732.2	25259.6	16270.6	11943
Q9ERY9	4	4	Erg28	Ergosterol biosynthetic protein 28 homolog	15.6279	15.4324	16.2769	15.7992	16.0738	15.9898	15.0503	15.1502	13.1707	16.2651	16.2217	16.8007	16.2121	16.2996	16.5048	15.445	15.046	15.6314	0.650568	0.090992	0	4	3	4	4	4	3	3	3	2	4	4	4	3	4	3	3	2	3	50637.3	44219.1	79401.3	57020.6	68977.1	65073.7
Q8C4M7	3	3	Cenpu	Centromere protein U	14.5569	14.4164	14.3142	14.2526	13.2785	14.1717	8.81231	13.5212	9.23919	14.4108	14.0486	14.2051	14.2218	14.1177	13.9896	13.4964	13.8896	10.0385	0.650558	0.471081	0	3	3	3	3	2	3	1	2	1	3	3	3	3	3	3	2	2	1	24103.4	21866.1	20370.5	19519.5	9936.09	18454.9
Q3TM20	3	3	Gnb1l	Guanine nucleotide-binding protein subunit beta-like protein 1	13.4481	13.9484	13.7553	13.6616	13.9031	8.4874	12.6113	12.797	12.4108	13.2522	13.4595	14.0258	13.7419	13.9224	13.8901	12.8025	12.8263	12.922	0.646618	0.291948	0	2	3	3	3	3	1	3	3	2	2	3	3	3	3	3	2	3	3	11175.9	15808.3	13828.3	12958.7	15319.4	358.89
Q6PFQ7	3	3	Rasa4	Ras GTPase-activating protein 4	13.7205	9.15982	13.5513	13.3616	13.3732	13.5002	12.9421	13.1855	12.7705	13.6276	13.6641	13.5746	13.5888	13.6152	13.7477	13.3099	13.089	13.1673	0.646616	0.194255	0	3	1	3	2	3	3	2	3	2	3	2	3	3	3	3	3	3	2	13498.8	571.98	12004.2	10525.9	10610.2	11587.1
Q61160	6	6	Fadd	FAS-associated death domain protein	14.6412	11.8243	14.869	11.1031	15.2073	15.2645	14.4167	14.6671	14.5225	14.7872	14.9955	14.2407	15.0586	15.1262	15.13	13.9414	14.596	14.4351	0.643893	0.235757	0	5	3	6	3	6	6	5	6	6	5	5	4	6	6	6	4	5	5	25553.5	3626.41	29922.7	2199.78	37832.4	39362.3
Q9CZT4	4	4	Polr3e	DNA-directed RNA polymerase III subunit RPC5	11.9455	11.9905	12.7017	11.7472	11.6694	8.97186	13.1521	11.9922	12.3644	12.4665	12.246	11.7898	11.9524	11.8091	12.3461	12.1692	13.6599	13.8549	0.639871	0.189742	0	2	2	3	2	2	1	4	3	3	3	2	2	2	2	3	3	4	3	3944.11	4069.21	6661.73	3437.68	3257.24	502.11
Q91Z49	4	4	Fyttd1	UAP56-interacting factor	14.3448	9.09458	14.9595	14.5968	14.1974	14.8151	14.8219	14.7972	14.7312	14.4626	14.1563	14.8845	14.3884	14.5137	14.5266	14.9056	15.129	15.1277	0.637321	0.329785	0	3	1	3	3	3	4	4	4	3	3	3	3	3	3	3	3	4	4	20807.4	546.69	31860.8	24779.1	18785.8	28825.7
G5E8L8	6	6	Map3k2	Mitogen-activated protein kinase kinase kinase 2	13.5974	14.2489	14.3572	14.1299	14.3551	10.339	15.4277	15.5983	15.5561	14.5396	14.2156	14.46	14.6055	14.7087	14.5351	15.5601	15.5047	15.216	0.637296	0.271156	0	3	4	4	4	4	2	6	6	6	5	5	5	5	5	5	5	6	6	12394.5	19468.7	20986.3	17927.9	20956.6	1295.26
Q8R3R8	3	2	Gabarapl1	Gamma-aminobutyric acid receptor-associated protein-like 1	14.5728	14.9267	14.2878	14.6276	14.0741	11.2377	13.3197	14.2675	14.5596	14.5159	14.6666	14.4465	15.029	14.3035	14.3697	14.9881	14.9442	14.3306	0.635633	0.120942	0	4	4	3	4	3	2	2	3	3	3	3	3	4	3	3	3	3	2	24369.2	31145.5	20000.6	25312.9	17247.5	2414.79
P55096	11	11	Abcd3	ATP-binding cassette sub-family D member 3	16.204	15.6077	16.2881	15.7569	15.9532	16.3256	13.3431	14.1804	13.3567	16.1149	16.8286	16.7862	16.6938	16.5197	16.3841	14.8238	13.7095	14.8396	0.631622	0.274032	0	9	6	11	8	8	11	5	6	5	9	9	11	11	9	9	6	6	7	75490.4	49933.5	80019.5	55372.3	63444.8	82127.4
L7N209	7	3	Hbs1l	Hbs1-like (S. cerevisiae)	12.538	13.8903	12.4727	12.3298	12.4668	12.3241	15.6766	14.1671	15.2544	13.7045	11.4261	13.7029	13.7432	12.7715	13.4302	15.7102	15.9087	16.3956	0.630362	0.38024	0	3	4	3	3	3	3	5	4	5	4	2	4	4	3	4	5	6	6	5947.24	15184	5683.84	5147.85	5660.67	5127.84
Q8K2A8	4	4	Alg3	Dol-P-Man:Man(5)GlcNAc(2)-PP-Dol alpha-1,3-mannosyltransferase	11.7452	13.4423	14.2521	13.3339	13.6519	11.5311	14.2367	14.0198	13.9064	13.7341	14.1827	13.5406	13.9486	14.1576	14.3432	14.0502	13.9682	13.8645	0.630013	0.0907215	0	2	3	4	3	3	2	4	4	4	4	4	3	4	4	4	3	4	4	3432.95	11131.2	19512	10325.3	12871.9	2959.46
A2BEE9	4	3	Dlg3	Disks large homolog 1	15.1067	15.1316	14.5637	14.9492	14.6988	14.2232	8.84248	6.59828	8.31129	14.8695	14.9569	14.84	14.6408	15.0967	14.9047	8.74288	7.27901	12.7575	0.629203	0.687393	0	5	5	4	5	5	4	2	1	1	5	5	5	5	5	5	1	1	3	35282.6	35897.8	24216.9	31634.8	26593.8	19125.1
Q3TJD7	9	9	Pdlim7	PDZ and LIM domain protein 7	12.5956	9.19264	14.0914	13.877	13.9317	14.7266	14.7511	14.5937	14.613	14.0703	14.1011	13.6085	14.5003	14.0383	14.1342	14.9042	14.1997	14.4726	0.628478	0.315914	0	4	1	5	5	5	7	7	7	6	6	5	4	7	5	6	7	6	6	6189.33	585.14	17455.6	15045.5	15626.2	27112
Q8VE22	7	7	Mrps23	28S ribosomal protein S23, mitochondrial	14.8029	11.5329	15.601	14.9414	15.6485	15.3846	16.0201	15.323	15.8541	15.3617	15.3391	15.5153	15.4607	15.7973	15.5616	16.0007	15.7763	15.9444	0.627612	0.19297	0	4	2	5	4	6	5	5	4	5	5	5	5	5	6	7	5	5	5	28583.2	2963.06	49701	31464	51366.1	42780
A0A0R4J0M1	4	4	Tbcc	Tubulin-specific chaperone C	12.4163	9.68813	13.26	13.2767	12.4509	12.367	12.9546	11.7707	12.6608	12.513	10.3225	14.6115	12.946	12.9309	13.2936	12.8035	13.0977	13.9744	0.627549	0.258333	0	2	1	3	3	2	2	3	2	3	2	1	4	2	2	3	3	3	4	5466.22	824.93	9809.88	9923.99	5598.61	5282.58
H7BX22	7	7	Ranbp1	Ran-specific GTPase-activating protein	19.716	19.572	19.7447	19.6826	19.7802	19.9509	12.5669	11.2324	14.074	19.8325	19.7682	19.7235	19.6096	20.1677	19.9008	12.9436	14.8535	15.1348	0.623833	0.689655	0	9	9	9	9	9	9	4	4	5	9	9	9	9	9	9	4	6	6	861214	779416	878526	841511	900390	1.01346e+06
F7AI87	6	2	Psmd4	Proteasome (prosome, macropain) 26S subunit, non-ATPase, 4 (Fragment)	13.8439	10.4124	14.1109	12.9029	13.1929	14.0589	16.7012	15.4217	15.8437	12.9923	14.1757	14.0365	13.5517	13.76	13.7735	16.467	16.612	16.7186	0.622112	0.442813	0	4	2	4	3	3	4	5	4	4	3	4	5	4	4	4	5	5	5	14704	1362.81	17693.5	7659.04	9363.71	17066.2
Q3URW7	3	1	R3hdm1	R3H domain containing 1	12.2536	11.9683	14.2848	14.3077	13.0121	12.0116	13.2582	12.8892	12.9172	14.3032	12.4707	14.4639	13.2807	13.3989	13.5014	13.2148	13.7579	14.108	0.621891	0.100125	0	2	2	4	4	3	2	3	3	3	4	2	4	3	3	3	3	4	4	4883	4006.9	19959.1	20278.5	8260.72	4128.95
Q5XFZ0	3	3	#N/A	UPF0711 protein C18orf21 homolog	9.19288	13.7957	8.68296	13.463	13.9219	13.7203	12.1977	12.5019	12.4235	13.3512	11.1682	13.6104	13.816	14.1886	11.4895	13.021	12.5917	12.2545	0.621245	0.414844	0	1	2	1	2	2	2	2	2	2	2	1	2	3	2	1	3	2	2	585.24	14220.6	410.99	11292	15521	13496.5
B1AWD8	9	9	Clta	Clathrin light chain A	18.1612	18.6382	18.6168	18.5344	18.4285	18.4324	17.8911	15.2495	15.9961	19.1414	18.561	18.7381	18.954	18.7969	18.9001	17.187	17.3636	17.8897	0.620385	0.217375	0	8	8	8	8	8	8	5	4	4	7	8	8	8	8	8	5	5	6	293136	408002	401989	379672	352809	353753
A2A7T8	3	3	Zmym1	Zinc finger, MYM domain containing 1	13.9731	13.6059	13.3246	13.9748	13.8068	13.8597	12.3674	7.06727	12.2472	13.8195	13.6333	13.9209	13.8862	13.6545	13.9168	12.4922	11.9102	12.5603	0.618591	0.439398	0	3	2	2	3	3	3	3	1	2	3	2	3	3	3	3	3	2	2	16081.2	12467.9	10258.6	16100	14330.1	14865.4
Q6P3E7	6	6	Hdac10	Polyamine deacetylase HDAC10	13.8871	14.1583	14.792	11.7882	14.0976	15.5418	15.8086	15.8824	15.6339	14.9152	14.4385	15.4194	15.3524	15.3183	14.4768	14.7147	16.2785	16.2418	0.61841	0.230194	0	3	3	4	2	3	4	6	6	6	4	3	5	4	4	3	4	6	6	15150.3	18284.1	28368.1	3536.84	17530.3	47701.9
Q9CPR1	4	4	Rwdd4	RWD domain-containing protein 4	11.9085	8.77863	12.8649	9.86313	12.2348	13.7004	16.0166	14.9332	14.5305	13.0589	9.60509	12.8935	12.6401	9.84461	12.6724	16.4651	16.5815	16.6346	0.618359	0.6124	0	2	0	2	1	2	3	3	3	3	2	0	2	2	1	2	4	4	3	3844.34		7459.44	931.32	4819.86	13311.8
Q8N9S3	5	5	Ahsa2	Activator of 90 kDa heat shock protein ATPase homolog 2	13.976	11.2113	15.4804	14.8934	14.6505	14.9827	16.0559	15.6004	16.0246	15.1495	14.7483	14.8659	15.0065	14.8969	15.1582	16.0267	16.1682	16.3912	0.615128	0.271378	0	3	2	4	4	4	5	4	4	4	5	4	4	5	4	5	4	4	4	16114	2371.04	45716.1	30434.6	25718.5	32377.4
Q8K4F0	4	4	Cd226	CD226 antigen	13.4111	12.3378	9.21709	13.7742	10.8048	14.3813	11.3014	14.5007	14.5791	9.71443	13.7876	13.6879	12.0389	13.929	14.3042	15.0748	14.466	12.8306	0.614011	0.472058	0	3	2	1	3	1	4	2	4	4	1	3	3	2	3	3	4	4	2	10893.2	5176.47	595.14	14009.9	1788.89	21340
A0A0U1RP62	4	4	Selenos	Selenoprotein S	8.50347	11.6992	12.0246	12.0855	12.2356	13.3723	15.8226	15.8304	16.6119	9.06148	12.9065	12.9366	12.7893	12.3173	13.1962	16.97	16.9655	16.5553	0.612529	0.624594	0	1	2	2	2	2	3	4	4	4	1	2	2	2	2	3	4	4	4	362.91	3325.05	4166.56	4345.94	4822.66	10604
A0A571BE60	3	3	Lrp8	Low-density lipoprotein receptor-related protein 8	14.1977	10.0433	11.8522	13.7574	14.0695	14.5861	13.4669	14.3689	14.8078	14.6519	12.9253	14.4961	12.826	12.6156	14.9604	14.8402	14.7167	14.6281	0.612295	0.330362	0	4	1	2	3	3	4	3	4	4	4	2	4	2	2	4	4	4	4	18789.9	1055.17	3697.05	13848.1	17192.5	24594.6
Q9D0J4	4	4	Arl2	ADP-ribosylation factor-like protein 2	15.0553	15.2653	15.2834	13.2024	13.527	15.6175	15.8057	13.5005	15.5187	14.0887	15.3583	15.1461	15.376	13.8513	15.069	16.2402	16.2202	16.9325	0.611838	0.220292	0	3	3	3	2	2	4	4	3	4	2	3	3	3	2	3	4	4	4	34047.6	39383.5	39880.6	9425.96	11804.2	50271.7
A0A2I3BRK6	6	6	Eny2	Transcription and mRNA export factor ENY2	15.4994	16.9661	16.4	16.5696	16.8056	16.819	15.7055	13.1686	15.3499	16.3943	17.121	17.1979	16.8545	17.1092	17.0785	15.4508	15.602	15.9815	0.611784	0.203641	0	4	4	5	5	5	5	4	3	4	4	4	6	5	5	5	4	4	5	46320.2	128030	86474.4	97263.4	114549	115617
E9QME3	6	6	Nsl1	NSL1, MIS12 kinetochore complex component	15.0675	12.7343	15.4227	15.0232	15.1329	15.4543	14.6717	14.5906	13.8894	14.7395	15.2744	15.6043	15.3069	15.7833	15.6936	14.8407	14.8032	15.4452	0.611614	0.0729557	0	5	3	7	5	5	6	6	6	5	4	5	6	6	6	6	7	7	6	34337.6	6813.83	43923.5	33299.9	35929.7	44894.8
Q8BUY9	6	6	Pggt1b	Geranylgeranyl transferase type-1 subunit beta	11.2319	13.7888	15.205	15.3777	15.2032	13.673	16.4812	16.0169	15.9819	15.4255	12.2143	15.5729	15.526	14.0379	15.4958	16.8884	16.5522	16.7452	0.61096	0.417465	0	2	3	4	4	4	3	5	5	4	4	2	4	4	3	5	5	5	5	2405.06	14152.6	37770	42575	37724.7	13060.9
Q9QZH3	7	7	Ppie	Peptidyl-prolyl cis-trans isomerase E	13.123	13.1123	15.2163	13.0133	13.4318	13.1178	16.8035	15.8667	16.4703	14.319	13.6948	14.32	14.4416	14.5629	14.3566	16.8213	16.1377	16.9789	0.608652	0.379622	0	3	3	6	3	3	3	6	5	6	4	3	4	5	4	4	6	5	6	8921.17	8854.98	38068.3	8268.15	11050.2	8888.94
Q3TB82	5	5	Plekhf1	Pleckstrin homology domain-containing family F member 1	14.3353	14.1725	14.1665	14.0986	13.7131	11.9331	15.0614	10.8536	14.3598	14.1111	12.9817	15.0971	15.1054	12.8648	13.9496	14.4333	14.4574	15.1693	0.608398	0.270789	0	3	3	3	3	3	2	5	2	4	3	2	4	4	2	3	4	4	3	20671.4	18465	18388.9	17543.1	13429.3	3910.53
A0A338P7L8	4	4	Chmp2b	Charged multivesicular body protein 2b	9.02948	9.3355	14.2922	11.8087	9.6412	8.63412	15.285	14.9173	15.0316	12.9438	9.61241	12.5249	12.2878	9.67451	9.82509	15.4182	15.4051	15.7382	0.60611	0.641816	0	1	1	3	2	1	1	4	4	4	2	1	2	2	1	1	4	3	4	522.57	646.05	20062.8	3587.29	798.53	397.31
Q6ZPT1	5	5	Klhl9	Kelch-like protein 9	13.9858	9.55737	14.1096	11.9518	13.8153	14.3761	14.7537	14.8392	15.2058	13.7266	14.5806	14.4724	14.2458	14.0572	12.1926	14.8623	15.1826	14.7028	0.603129	0.376891	0	3	1	3	2	3	3	5	5	5	3	3	4	3	3	2	4	5	4	16223.7	753.45	17676.8	3961.44	14414.9	21263.4
Q9CY62	5	5	Rnf181	E3 ubiquitin-protein ligase RNF181	14.4479	10.501	13.8195	14.4434	13.9568	13.6784	14.1169	14.0744	14.8905	14.0284	14.8247	14.3306	14.5517	14.212	14.1664	14.1544	14.7494	14.3257	0.601607	0.187278	0	3	2	3	4	3	3	4	4	4	3	4	4	4	4	4	3	4	4	22348.9	1449.16	14457.3	22278.7	15901.1	13110.6
O35114	6	6	Scarb2	Lysosome membrane protein 2	12.72	12.6511	14.565	12.6528	14.2235	14.2541	16.1364	15.6198	15.714	14.5961	14.2893	14.305	14.4053	13.2779	14.4161	16.0955	16.1321	16.4284	0.601001	0.316539	0	3	3	4	3	4	4	6	6	6	5	4	4	4	3	5	6	6	6	6746.8	6432.19	24238.9	6439.91	19129.7	19539
Q3U1C4	7	7	Secisbp2	SECIS binding protein 2	14.1084	10.6919	13.9736	14.4592	14.4832	13.1191	15.1093	14.8781	15.3253	14.0925	14.4479	14.4227	14.2515	14.5631	14.6396	15.0826	15.0385	14.9955	0.598407	0.235236	0	4	2	4	4	5	3	7	6	7	4	4	5	5	5	5	6	6	7	17662.6	1654.22	16087.1	22525	22901.8	8897
E9Q634	19	15	Myo1e	Unconventional myosin-Ie	12.5014	13.5507	13.7957	14.6562	15.2306	14.1168	17.4029	17.3216	18.1756	13.8661	14.8084	14.8429	15.3593	15.9257	14.1525	18.4229	17.3418	17.4041	0.596905	0.492722	0	5	6	7	9	10	8	16	16	18	7	9	9	10	11	8	18	17	17	5798.33	11999.8	14221.1	25819.4	38448.3	17765
Q3U3G8	6	6	Serhl	Serine hydrolase-like protein	14.526	14.2909	15.7072	14.1187	12.5328	12.0657	15.2862	15.1298	12.0887	14.2394	12.6573	15.3504	14.6009	14.4541	14.1402	15.1846	15.2597	15.2258	0.59628	0.292648	0	4	4	7	4	3	3	6	6	3	4	3	6	5	4	5	5	6	6	23592.1	20043.9	53496.6	17789.6	5925.71	4286.96
E9QAF9	6	6	Tanc1	Protein TANC1	9.00481	11.4456	11.1243	8.42668	9.98507	8.29034	14.857	14.6215	14.5202	10.0706	9.97417	9.87546	12.1743	13.3201	10.2207	14.3932	14.0246	13.5527	0.592251	0.599279	0	1	3	3	1	2	1	6	6	6	2	1	2	3	4	2	5	6	5	513.71	2789.19	2232.25	344.1	1013.46	313.07
D3YWR1	8	4	Gnpda2	Glucosamine-6-phosphate isomerase 2	16.0084	11.728	16.4254	15.2037	16.2905	16.1269	17.1231	16.3954	16.4597	15.2478	16.2207	16.1044	16.1039	15.5573	16.151	16.7415	17.3206	17.6324	0.590954	0.33082	0	6	2	6	4	6	5	8	7	7	4	5	5	6	4	6	7	8	8	65920.7	3392.16	88011.1	37737.4	80154.7	71561.8
Q9Z0I6	6	6	Slfn2	Schlafen family member 2	10.8082	11.4416	13.8154	12.5235	12.8692	14.4157	14.727	14.0817	13.7395	10.9415	12.7661	14.0233	14.1214	12.8469	14.124	14.8146	15.0074	15.0946	0.590878	0.367014	0	2	2	4	3	3	5	5	4	4	2	3	5	4	3	5	5	5	5	1793.04	2781.46	14416.6	5887.83	7482.17	21854.8
Q9JIZ5	5	5	Tfap4	Activator protein 4	14.831	11.9597	14.6514	14.7409	14.1902	14.8969	12.9609	13.4315	13.6613	14.8746	14.9953	14.6009	14.7267	14.7386	14.7635	13.8482	14.0599	14.0273	0.590134	0.124651	0	4	2	4	5	3	4	3	3	3	5	4	4	5	4	4	4	4	4	29146.1	3983.12	25734	27382	18692.3	30508.2
O89017	4	4	Lgmn	Legumain	12.4165	13.5445	11.9583	12.515	12.3198	13.4428	14.7716	13.9287	13.4171	13.3103	13.2409	12.6275	13.4483	12.3907	13.0653	15.0102	15.3449	15.1868	0.590067	0.241085	0	2	3	2	2	2	3	4	3	3	3	3	2	3	2	3	4	4	4	5467	11947.9	3979.22	5853.02	5112.45	11135.1
A2ASY0	6	6	Taf3	Transcription initiation factor TFIID subunit 3	14.3652	14.854	14.827	12.8222	12.9545	10.6285	15.0313	14.7298	14.5822	14.468	14.504	13.2494	14.5126	13.0809	14.7636	15.2295	15.324	14.9704	0.589724	0.304313	0	4	5	6	3	3	2	6	5	5	4	4	3	5	3	5	6	6	6	21104.2	29614.9	29065.2	7242.27	7937.83	1583.11
Q61411	4	3	Hras	GTPase HRas	11.7944	11.9618	11.5257	13.5997	12.0032	13.3333	16.3547	15.2388	15.6241	12.0425	12.1459	13.4304	13.3636	13.4112	13.1671	16.3119	16.4231	16.4436	0.589292	0.503209	0	2	2	2	3	2	3	5	4	4	2	2	3	3	3	3	5	5	5	3551.96	3989.09	2948.32	12414	4105.01	10320.8
H3BL81	3	3	Chtf8	Chromosome transmission fidelity protein 8 homolog	8.4496	12.4382	11.8662	10.4577	12.0827	12.0595	11.7866	12.1349	12.5556	10.8785	11.1004	12.1664	12.6004	11.1579	12.4457	12.806	12.7937	13.182	0.588859	0.275024	0	1	3	3	2	3	3	4	4	4	2	2	3	4	2	3	4	4	4	349.61	5549.74	3733.28	1406.32	4337.61	4268.42
Q45VK7	3	3	Dync2h1	Cytoplasmic dynein 2 heavy chain 1	13.9344	13.5077	14.1001	14.1918	14.3277	8.9911	13.064	13.6143	13.7043	13.7294	14.057	13.5549	13.9652	14.3109	14.4149	13.4982	13.4485	13.737	0.586753	0.312597	0	2	2	3	2	3	1	2	3	3	2	2	2	3	2	3	3	2	2	15655.3	11647.4	17561.7	18713.1	20561.6	508.85
Q9D7X8	5	5	Ggct	Gamma-glutamylcyclotransferase	14.2669	12.023	14.9207	11.6412	15.5309	15.4823	16.5017	16.0892	16.19	12.912	14.7599	14.7694	14.6798	15.4652	15.6117	16.8516	16.3901	16.4814	0.586121	0.426895	0	3	2	3	2	4	4	4	4	4	2	3	3	3	4	4	4	4	4	19714.1	4161.9	31016.4	3194.06	47342.9	45775.6
F2Z470	9	9	Hmgcr	3-hydroxy-3-methylglutaryl-coenzyme A reductase	14.4823	14.4997	12.4025	14.1175	9.27109	14.3891	15.2603	15.5635	16.1048	14.5524	14.4128	13.1682	14.299	13.5854	13.0931	16.2761	16.074	15.8917	0.584657	0.475796	0	5	5	3	5	1	5	7	7	8	5	5	4	5	4	4	8	9	8	22888	23165.6	5414.18	17774.8	617.84	21455.8
P22518	5	3	Clk1	Dual specificity protein kinase CLK1	14.2038	9.84833	14.5599	14.4815	14.6687	14.6869	15.0186	14.9043	14.9162	14.3598	14.5249	14.7722	14.8015	14.6865	14.7286	14.8569	14.7372	15.0784	0.584195	0.301749	0	4	2	4	5	5	5	5	5	5	4	5	5	5	5	5	5	5	4	18869.5	921.81	24152.4	22875.5	26044.2	26375.9
A0A286YCY3	5	1	Kif20b	Kinesin family member 20B (Fragment)	11.3243	11.3863	13.9805	13.2264	12.3497	13.4533	13.694	13.2891	13.9033	13.161	13.6023	14.0956	13.4832	12.9835	13.1228	13.8534	13.9537	13.6039	0.583629	0.130152	0	2	2	4	4	3	4	3	3	3	3	4	4	4	3	4	3	3	3	2564.15	2676.75	16163.5	9584.04	5219.52	11215.9
Q501J2	5	5	Antkmt	Adenine nucleotide translocase lysine N-methyltransferase	14.112	14.0759	13.4427	14.1925	11.876	8.62158	14.031	13.8483	13.9491	14.1439	14.1302	11.9717	14.321	12.3087	12.3746	14.8362	14.5342	14.779	0.58338	0.431223	0	3	3	3	4	2	1	4	4	4	4	3	2	4	2	2	4	5	3	17706.1	17269.1	11134.4	18722.1	3758.56	393.87
Q3V113	3	3	Pygo2	Pygopus 2	10.0896	10.1756	13.4548	9.62381	13.5244	13.7439	14.6057	14.4963	14.7575	13.61	13.344	10.7376	13.6636	10.692	13.796	14.5672	14.758	14.5382	0.581672	0.515896	0	1	1	2	1	2	2	3	3	3	2	2	1	2	1	2	3	2	3	1089.6	1156.55	11227.9	788.96	11782.7	13719.1
Q9D358	6	6	Acp1	Low molecular weight phosphotyrosine protein phosphatase	18.68	18.1608	18.6214	18.3109	18.8787	18.3049	13.9205	13.3706	12.7738	18.8951	19.431	19.0721	19.0513	19.2521	19.2969	13.258	14.9681	13.0284	0.581256	0.651635	0	6	5	6	6	6	5	3	3	2	6	5	6	6	6	6	2	3	2	419991	293057	403285	325185	482022	323844
O89023	5	5	Tpp1	Tripeptidyl-peptidase 1	12.0671	13.7973	14.3049	14.6494	11.8272	14.9784	16.5579	15.7748	15.6177	14.7913	14.0839	14.781	13.8418	13.5794	14.1184	16.3729	16.4306	16.8048	0.581044	0.404202	0	2	3	4	5	2	5	6	6	6	5	3	4	3	3	4	6	6	6	4290.98	14236.3	20239.1	25698.9	3633.73	32280.5
Q9CQT5	3	3	Pomp	Proteasome maturation protein	8.62176	8.77863	8.02885	8.35652	8.97386	12.8385	13.8058	12.2092	14.8119	9.44733	9.46352	8.79181	8.8888	13.5849	9.32281	14.5318	14.2099	13.402	0.579764	0.642935	0	0	0	1	0	0	2	3	2	3	1	1	1	1	2	1	3	3	2			261.17			7324.35
O55142	16	16	Rpl35a	60S ribosomal protein L35a	20.1156	18.6031	20.1753	20.384	20.5092	20.7293	15.5098	13.8438	14.2629	20.0527	20.6369	20.1692	20.1357	20.755	20.8692	15.601	15.1821	15.938	0.578545	0.652075	0	11	10	14	14	14	13	10	7	7	12	14	14	13	14	16	10	9	9	1.13608e+06	398180	1.18408e+06	1.3683e+06	1.49242e+06	1.73838e+06
A0A0R4IZY1	3	3	Dtx2	Probable E3 ubiquitin-protein ligase DTX2	12.1976	8.91639	12.9099	12.801	12.8423	12.788	12.9274	12.4343	13.028	13.0946	12.8274	12.6508	12.5127	12.9087	12.8462	13.0763	13.2554	12.8783	0.578395	0.20767	0	2	1	3	3	3	3	3	2	3	3	2	3	2	3	3	3	3	3	4697.1	483.17	7696.11	7136.42	7343.89	7072.37
Q9CRB2	8	8	Nhp2	H/ACA ribonucleoprotein complex subunit 2	13.9654	11.9288	15.8953	15.0041	14.1835	15.4748	17.2548	16.3618	17.0077	13.8248	16.4795	15.8207	15.7439	15.3778	13.905	16.7026	17.1965	17.229	0.578175	0.423209	0	3	2	5	4	3	5	6	5	6	3	6	5	4	5	3	5	6	6	15996.3	3898.74	60949.9	32860.4	18606.4	45539.6
P70191	4	4	Traf5	TNF receptor-associated factor 5	11.506	11.6305	14.3668	13.9192	12.2821	13.5943	14.6092	14.3142	14.6177	14.3358	12.5925	13.8953	14.6845	13.9333	12.5816	14.7015	14.6415	14.6635	0.576578	0.277249	0	2	2	4	3	2	3	4	3	4	3	2	3	4	3	2	3	4	4	2908.4	3170.54	21127.1	15491.4	4980.71	12367.9
Q8BYN3	5	5	Itpk1	Inositol-tetrakisphosphate 1-kinase	11.4653	10.8925	10.9513	11.0232	11.434	13.7564	15.3999	14.7107	15.2944	8.97725	13.3169	11.9293	12.0718	13.0412	14.8963	15.0623	15.3407	15.4557	0.573748	0.563148	0	2	2	2	2	2	4	4	4	4	1	3	2	2	3	4	3	4	4	2827.43	1900.99	1980.02	2081.15	2766.82	13838.2
P56135	7	7	Atp5mf	ATP synthase subunit f, mitochondrial	18.7106	17.0489	18.4144	18.3082	17.908	19.0538	14.8665	14.984	15.8294	18.7266	19.2952	17.9048	19.6758	19.2718	18.9635	14.6861	16.565	15.1979	0.573671	0.498093	0	5	3	5	5	4	5	3	3	4	5	5	4	6	5	5	3	4	3	428980	135594	349371	324570	245945	544208
Q9D6J5	3	3	Ndufb8	NADH dehydrogenase [ubiquinone] 1 beta subcomplex subunit 8, mitochondrial	13.4358	12.9431	13.7311	9.66954	13.7424	13.9442	14.4102	14.1064	14.3334	13.9175	13.2858	13.7653	13.7221	13.9092	14.0053	13.8593	14.4167	14.5945	0.573289	0.271022	0	3	2	2	1	3	3	2	3	3	2	2	2	2	3	3	3	3	3	11081.2	7875.06	13597.6	814.37	13705.3	15762.1
A0A7N9VR83	6	6	Tusc3	Tumor suppressor candidate 3	11.3077	11.5151	13.9415	12.942	14.24	12.6892	16.1855	14.2349	14.9309	13.2341	11.8617	13.2449	13.0338	13.0588	13.1893	16.373	15.9191	17.2159	0.571544	0.493765	0	2	2	4	3	4	3	6	4	5	3	2	3	3	3	3	6	5	6	2534.88	2926.85	15733	7869.38	19350	6604.18
O70378	6	6	Emc8	ER membrane protein complex subunit 8	14.2045	12.4406	14.999	14.5501	14.6242	14.1969	16.0594	14.6256	15.171	14.9199	14.3473	14.8684	14.1841	15.0398	14.5076	15.9256	15.8322	16.3684	0.569114	0.186493	0	3	2	4	4	4	4	7	6	6	5	3	4	3	5	4	7	7	7	18879.3	5559.03	32745.4	23989.3	25253.4	18780
A0A1D5RLT6	4	4	Gramd1b	Protein Aster-B	10.9348	9.84332	14.0336	9.04971	8.64577	13.2731	14.4351	14.2149	13.8533	13.7439	9.17458	11.8474	13.6872	13.6232	9.38718	13.9096	14.0137	14.0166	0.568853	0.591386	0	2	1	4	1	1	3	4	4	4	3	1	2	3	3	0	3	4	4	1957.53	918.62	16770.2	529.95	400.53	9899.44
Q8QZZ7	4	4	Tprkb	EKC/KEOPS complex subunit Tprkb	13.3366	13.7936	13.7738	11.1052	14.3187	14.1934	13.1401	12.4	12.3157	14.0205	14.4846	14.1254	14.3235	14.3454	13.8447	12.3207	13.2825	12.7404	0.567828	0.207479	0	3	3	4	2	4	4	4	3	3	4	4	4	4	4	3	3	4	2	10344.8	14200.2	14006.7	2202.87	20434.3	18734.3
A0A668KL36	10	10	Ccdc50	Coiled-coil domain-containing protein 50	16.295	16.194	16.1261	16.4145	16.2794	16.5557	14.2523	13.7913	14.4674	16.8779	16.9908	15.6792	16.689	17.0625	16.7826	15.4434	15.1618	14.7825	0.566011	0.245177	0	9	8	9	9	9	10	5	5	5	9	9	8	9	9	9	5	5	5	80404.5	74967.1	71520.6	87349.2	79540.4	96331.2
Q9JJI8	4	4	Rpl38	60S ribosomal protein L38	15.9189	12.4146	16.3749	16.0196	16.1439	16.2325	15.471	15.1632	15.4278	16.0624	15.8109	16.1905	16.1895	15.7457	16.3783	15.8325	15.9528	16.0974	0.56595	0.187097	0	4	2	5	5	5	5	4	4	4	5	3	5	5	3	4	4	4	4	61953	5459.86	84985.8	66431.8	72410.2	76994.6
Q149G0	3	3	#N/A	UPF0561 protein C2orf68 homolog	13.471	14.3211	13.2689	10.5527	13.7047	13.1442	12.4957	12.9389	13.3931	13.6846	13.7992	13.5948	13.98	13.6896	13.7123	13.0074	13.5872	13.3213	0.565129	0.141062	0	3	3	3	2	4	3	3	3	4	4	3	4	4	4	4	3	3	3	11354.6	20468.5	9870.48	1502.05	13351.4	9053.36
Q5ND50	6	6	Crk	Adapter molecule crk	14.0988	13.9713	15.3101	13.8998	15.148	14.9991	16.0653	15.5099	15.7542	15.2127	14.5291	15.2116	16.1689	15.5031	15.5571	15.4485	15.9276	16.2822	0.564925	0.0991965	0	3	3	5	3	5	5	6	5	6	4	3	4	6	5	5	5	6	6	17545.1	16061.7	40626	15284.4	36307.4	32746.9
A0A0R4J1R7	3	3	Pcbd2	4a-hydroxytetrahydrobiopterin dehydratase	13.1028	8.93608	13.8553	13.3404	13.6666	13.7296	15.0136	14.7066	15.006	13.5712	13.5717	13.9248	13.3512	13.5357	13.3269	15.0439	15.015	15.0888	0.563598	0.410206	0	2	1	2	2	2	2	2	2	3	2	2	3	2	2	2	3	3	3	8796.91	489.81	14820.6	10371.8	13003.2	13583.6
Q9D892	8	8	Itpa	Inosine triphosphate pyrophosphatase	16.3133	15.4114	16.6619	16.413	16.7161	16.7764	15.6395	14.804	16.4341	17.0786	16.5437	17.208	16.8187	16.9056	17.0093	16.1448	16.1615	16.3353	0.559539	0.0511759	0	8	5	7	8	8	8	5	5	6	8	7	8	8	8	8	5	5	6	81430.8	43579.6	103691	87259.1	107660	112256
Q9CQV5	6	6	Mrps24	28S ribosomal protein S24, mitochondrial	15.3451	15.5781	15.2868	15.368	14.9928	15.3265	9.74759	13.6006	13.7161	15.3106	15.7456	15.1676	15.1397	15.4057	15.1486	14.1515	14.0425	13.8803	0.558935	0.411173	0	5	6	6	6	5	6	2	4	4	6	6	5	6	6	5	5	4	4	41624.3	48920.3	39976.1	42289	32605	41090.2
Q6ZQJ5	6	5	Dna2	DNA replication ATP-dependent helicase/nuclease DNA2	15.3049	15.2726	15.1142	15.1465	15.0836	15.6019	12.4597	11.8276	14.0293	15.5762	15.844	15.6043	15.6317	15.698	15.5812	13.5408	13.452	13.9135	0.555711	0.344272	0	5	5	5	5	5	6	3	3	4	5	6	6	6	5	5	3	3	4	40480.6	39584.3	35466.3	36271.2	34723.9	49732.6
Q8K2H6	3	3	Anapc10	Anaphase-promoting complex subunit 10	12.4673	12.3913	14.1044	13.5731	13.029	13.8489	14.5539	13.8653	14.2786	14.0856	14.0154	14.4356	14.0221	13.6188	14.0242	13.9919	14.6354	14.2817	0.555427	0.061825	0	2	2	3	3	2	3	3	3	3	3	3	4	3	2	3	3	3	3	5662.83	5372.23	17613.2	12187.4	8358.43	14754.4
A0A668KLD3	3	3	Akap12	A-kinase anchor protein 12	8.81417	8.57626	7.64868	8.35652	8.56993	7.82991	11.7538	12.0553	12.2186	9.08562	8.58658	9.19679	9.47488	9.52537	9.38718	11.8512	12.3059	11.3986	0.554323	0.486927	0	1	1	1	0	1	1	2	3	3	0	1	0	0	0	0	2	3	2	450.12	381.69	200.67		380.02	227.53
Q8R3W2	4	1	0610009B22Rik	RIKEN cDNA 0610009B22 gene	14.3279	13.0487	14.3844	14.3449	14.2111	14.2813	11.4483	14.8567	14.791	14.4055	13.6726	14.8281	14.4433	14.494	14.4935	14.7831	14.7636	14.7981	0.554194	0.162279	0	4	3	4	4	4	4	2	4	4	4	3	4	4	4	4	4	4	4	20564.8	8473.06	21386	20808.1	18965.3	19911.1
Q711T7	5	5	Nadsyn1	Glutamine-dependent NAD(+) synthetase	10.4218	10.6402	12.2714	9.7453	12.1528	11.8198	14.6239	12.5381	13.8433	10.0232	12.71	13.2903	10.3907	10.5268	13.8339	13.5916	14.2199	14.4551	0.553893	0.493551	0	2	2	3	2	3	3	5	4	5	2	3	4	2	2	4	5	5	5	1371.71	1595.93	4943.72	858.28	4553.57	3615.1
A2ANX3	5	4	Atp8b4	Phospholipid-transporting ATPase	10.3547	8.90292	7.92576	8.18408	11.2092	12.827	14.1403	14.8473	15.0924	10.3802	13.223	8.08311	11.7178	14.2822	12.2844	15.5301	14.5398	8.42664	0.553738	0.675267	0	2	1	1	1	2	3	4	3	3	2	3	1	2	5	2	3	3	1	1309.41	478.68	243.16	290.84	2367.55	7266.12
A0A3B2WBC6	3	3	Polr2m	Polymerase (RNA) II (DNA directed) polypeptide M	15.3653	9.22494	15.0524	15.2572	15.3195	15.4748	14.4281	14.6727	15.1116	14.8468	14.4758	14.9906	14.9334	15.2885	15.2357	14.6963	15.3007	15.112	0.552579	0.419945	0	3	1	3	3	3	3	2	2	2	2	2	2	2	3	3	2	2	2	42210.7	598.39	33979.8	39162.7	40890.3	45538.9
Q8JZM0	6	6	Tfb1m	Dimethyladenosine transferase 1, mitochondrial	11.2966	11.5031	14.0941	10.6682	14.4791	10.6335	13.3683	12.7589	10.654	13.5476	14.3794	14.536	11.2651	10.4695	13.3623	12.6767	10.6298	13.5605	0.552338	0.460138	0	2	2	5	2	5	2	4	4	2	4	4	6	2	2	4	3	2	4	2515.4	2902.51	17488.8	1627.26	22837.2	1588.61
Q8K2W3	5	5	Txndc11	Thioredoxin domain-containing protein 11	13.9239	14.0466	14.5194	14.9151	14.7665	9.89524	14.8145	14.7093	14.8886	14.7235	14.7505	14.6144	13.9524	14.6825	14.4479	14.7713	14.6503	14.8363	0.550005	0.324275	0	3	3	5	5	4	2	5	5	5	4	5	5	3	4	4	5	5	5	15542.1	16922.2	23484.6	30895.3	27871.6	952.28
A2AEG6	3	3	Gpm6b	Neuronal membrane glycoprotein M6-b	12.2805	14.3915	14.5772	14.365	14.5087	13.9987	13.7043	13.6997	9.12808	13.7339	12.9014	14.8948	14.7123	14.5819	14.8582	12.6433	12.9247	14.3527	0.54993	0.41679	0	2	3	4	3	3	3	4	4	0	3	2	4	4	4	4	3	3	4	4975.2	21492.1	24443.3	21100.8	23310.9	16369.2
E9PXC2	6	6	Usf2	Upstream stimulatory factor 2	13.8356	10.989	14.172	12.002	12.5044	13.471	15.214	15.0116	15.0051	13.9225	12.9743	13.7306	13.8579	12.879	13.784	15.0043	15.1933	15.7858	0.547432	0.371041	0	4	2	5	3	3	4	6	5	6	4	3	4	4	3	4	5	5	5	14619.8	2032.45	18458.8	4101.7	5810.51	11354.7
F6W5Q8	9	9	Vta1	Vacuolar protein sorting-associated protein VTA1 homolog	15.4519	12.8274	16.145	15.2216	16.044	15.6307	17.0848	16.7658	17.0128	16.1731	15.8014	16.0994	15.7853	16.1406	15.9783	16.9724	17.0053	17.1378	0.545497	0.262556	0	6	4	8	6	8	7	9	9	9	8	6	8	7	8	8	8	9	9	44822.5	7268.31	72464.1	38207.5	67566.3	50733.8
O88693	5	5	Ugcg	Ceramide glucosyltransferase	10.5155	13.6674	11.7385	10.0335	12.7084	13.9711	16.2483	16.0247	16.5015	13.7788	12.6284	12.9352	14.5208	14.2385	11.1954	16.749	15.8457	14.4224	0.545044	0.588657	0	2	4	3	2	3	4	6	6	6	5	3	3	5	4	2	6	6	5	1463.79	13010.4	3416.97	1048.07	6692.61	16058.8
A0A0R4J0C0	3	3	Nsmce1	Non-structural maintenance of chromosomes element 1 homolog	15.5067	15.6295	15.344	10.0481	15.1104	14.9719	14.7688	15.1617	15.0675	15.5648	15.3065	15.309	15.4799	14.458	14.8978	15.1083	15.3833	15.0053	0.544931	0.369372	0	3	3	3	1	2	2	2	3	3	3	2	3	3	2	2	3	3	3	46555.6	50692.2	41590.8	1058.7	35375.2	32136.3
Q9Z0Y1	6	6	Dctn3	Dynactin subunit 3	13.823	13.5666	15.6825	13.1944	14.2228	14.4974	17.514	15.3902	16.3631	14.6013	14.6976	15.2322	13.9976	14.2646	14.4358	16.4563	17.3918	18.0668	0.543352	0.439353	0	3	3	5	3	3	4	5	3	5	4	4	4	3	3	3	5	5	5	14492.4	12133	52589.1	9373.41	19119.5	23128.2
P67984	8	6	Rpl22	60S ribosomal protein L22	20.0114	18.6977	19.8394	19.2511	20.2664	20.435	13.299	13.4601	12.8256	19.5247	20.3214	19.73	19.7379	20.1472	20.2297	14.0076	13.8073	15.4638	0.542663	0.713226	0	10	8	10	9	10	10	5	5	4	10	10	8	10	9	9	5	5	8	1056928	425175	938110	623949	1.26123e+06	1.41757e+06
A2AM74	3	2	Kif17	Kinesin-like protein KIF17	14.5656	14.3125	13.6464	14.4963	14.3582	8.80826	13.289	13.7861	12.717	14.397	14.3398	14.6201	14.0701	14.0998	14.308	12.7956	13.3099	12.9228	0.542626	0.411043	0	3	2	2	3	3	1	2	2	2	2	2	3	2	2	2	2	2	2	24249	20347.1	12822.5	23111.3	21000.9	448.28
G5E8X1	6	6	Mettl26	Methyltransferase-like 26	16.7749	12.9301	16.96	16.8876	17.0593	16.7409	16.5036	16.7986	16.6276	16.8628	16.8781	17.4475	16.9978	16.6961	16.842	16.6039	16.7571	17.0736	0.541815	0.236734	0	6	3	6	6	6	5	5	7	7	5	5	7	7	5	6	6	6	6	112139	7804.75	127490	121246	136570	109524
Q07231	4	4	Zscan21	Zinc finger and SCAN domain-containing protein 21	14.5554	14.8054	13.2594	13.4078	13.5431	13.8384	11.9456	7.89099	13.0843	13.6515	14.6504	13.7143	14.0103	14.5389	13.8266	10.3606	13.2361	13.2139	0.541347	0.512029	0	3	3	2	2	2	2	2	1	3	2	3	2	2	3	2	1	3	3	24077.3	28633.5	9805.35	10868	11936.2	14648
Q8VED2	3	3	Bloc1s4	Biogenesis of lysosome-related organelles complex 1 subunit 4	12.8786	9.26442	13.7962	14.0674	13.615	8.2241	13.9925	13.9541	14.1293	13.8133	13.2816	13.7859	8.82448	13.7786	13.4542	14.1092	14.1173	13.6291	0.541338	0.571354	0	2	1	3	3	3	1	3	3	3	3	2	3	1	3	2	3	3	3	7530.9	614.99	14225.5	17167.1	12546.5	299.02
Q6P4T1	4	4	Snx19	Sorting nexin-19	13.3596	12.9956	12.6178	13.6527	12.4046	12.5858	13.4189	13.0259	12.4933	12.7119	13.1625	13.4315	12.7169	15.1473	15.1246	13.1312	13.1195	12.8799	0.54124	0.145524	0	3	2	2	3	2	2	3	3	2	2	3	3	2	4	4	3	3	2	10510.7	8166.86	6285.39	12878.7	5421.91	6147.52
A2AQD5	6	6	Itprid2	Protein ITPRID2	11.0842	13.9229	14.2215	14.4446	12.7218	10.6004	15.2446	15.1351	14.9597	14.5644	13.1661	14.3206	14.2536	12.986	12.5557	15.3145	14.8324	15.2049	0.540369	0.431061	0	2	4	5	5	3	2	6	6	6	6	3	4	4	3	3	6	5	6	2171.03	15531.8	19103.2	22298	6755.4	1552.55
Q5RKZ7	3	3	Mocs1	Molybdenum cofactor biosynthesis protein 1	12.8657	13.4922	12.3826	12.859	12.9975	9.08725	12.5975	12.6723	12.4573	13.3012	12.9341	13.1198	13.1533	13.1462	13.0747	12.665	12.4988	12.3731	0.539433	0.237651	0	2	3	2	2	2	1	3	3	3	2	2	2	2	2	3	3	3	3	7463.97	11522.5	5340.04	7429.36	8177.79	543.92
Q9JHS3	3	3	Lamtor2	Ragulator complex protein LAMTOR2	14.3967	14.0697	14.4873	12.1887	12.8611	14.0455	14.0282	14.2326	14.1972	14.1564	14.6121	14.7546	13.6436	14.53	14.0223	14.6774	14.369	14.5892	0.538603	0.0781008	0	4	3	4	2	2	3	3	4	4	3	4	4	3	4	3	4	4	4	21569.8	17195.2	22967.8	4668.32	7440.21	16909.4
Q3U1V6	3	3	Uevld	Ubiquitin-conjugating enzyme E2 variant 3	13.9317	13.5241	13.6436	13.1912	9.39448	13.879	13.1718	13.694	13.7672	14.243	13.9464	13.7978	13.9571	13.8401	13.5663	13.1165	13.2247	13.3365	0.536794	0.291906	0	3	2	2	2	1	2	2	3	2	3	2	2	2	2	2	2	2	2	15626.9	11780.8	12797.4	9353.08	673.01	15065.9
Q6Y5D8	8	8	Arhgap10	Rho GTPase-activating protein 10	14.7823	13.1308	12.5166	13.0599	14.6893	14.8471	15.6302	15.556	15.3651	14.5462	14.9023	14.6564	14.3217	14.7727	14.8371	15.5109	15.3515	15.5039	0.536176	0.218831	0	7	4	4	4	5	5	8	8	8	5	5	7	5	6	6	7	8	7	28178.5	8969.28	5859.46	8539.26	26418.4	29473
P56371	10	7	Rab4a	Ras-related protein Rab-4A	14.9701	14.085	13.4409	13.1815	14.1729	15.3678	15.8435	16.0794	16.3495	15.0075	14.9164	14.2199	15.1455	14.9962	14.8216	16.259	16.4525	16.4867	0.534958	0.276035	0	5	4	4	4	5	7	8	9	9	6	6	5	7	6	6	9	9	9	32095.2	17378.2	11120	9290.39	18469.5	42284.2
Q9D6J3	8	8	Yju2	Splicing factor YJU2	12.754	13.5848	14.0766	13.8227	12.923	12.4401	15.6356	15.6194	16.0649	14.2258	12.9196	14.9369	14.3538	14.1015	13.9797	15.7032	15.8811	15.6343	0.534953	0.352924	0	4	5	6	5	4	4	9	10	10	6	4	8	7	5	6	9	9	9	6907.93	12286.6	17276.8	14489.4	7766.49	5557.11
A2A513	12	7	Krt10	Keratin, type I cytoskeletal 10	18.2728	15.9702	20.4043	18.6976	17.7001	16.4641	18.4325	17.6113	18.41	17.7299	20.0748	17.759	17.6264	17.1908	17.4468	21.3643	19.1662	18.4157	0.53456	0.414173	0	9	6	10	9	8	6	9	8	8	9	11	8	8	7	8	12	10	9	316708	64195.1	1387688	425153	212941	90403.7
A0A0G2JDK3	3	3	Rabggtb	Geranylgeranyl transferase type-2 subunit beta	9.54402	9.85381	9.15462	9.34438	9.7197	14.0719	14.2448	14.5679	15.4062	10.2893	10.4572	10.2137	10.5357	10.4757	10.491	16.3379	15.8942	16.0087	0.532881	0.68831	0	1	1	1	1	1	2	2	2	3	1	1	1	1	1	1	2	3	3	746.51	925.32	569.92	650.04	843.18	17221.7
Q62172	4	4	Ralbp1	RalA-binding protein 1	10.6743	11.2694	14.4842	8.61868	8.77179	8.46222	15.3412	15.4559	15.3352	11.2032	9.31418	13.6034	13.4717	11.2473	8.99698	15.3384	15.3474	14.6782	0.531992	0.692587	0	2	2	4	1	1	1	4	4	5	2	1	3	3	2	1	4	4	3	1634.09	2468.44	22917.8	393.08	437.09	352.68
P05480	6	3	Src	Proto-oncogene tyrosine-protein kinase Src	14.7194	12.0791	15.3704	15.2997	14.8787	13.3356	15.5887	15.8868	14.8397	14.9325	15.0956	15.0597	15.3758	13.8586	15.2142	15.2125	15.9902	16.0332	0.530488	0.262656	0	4	2	6	5	4	3	6	6	5	5	4	5	6	3	5	5	6	6	26975.4	4326.83	42360	40333.9	30125.6	10337.7
Q9CZ91	5	5	Srfbp1	Serum response factor-binding protein 1	9.29547	14.5375	14.357	14.5577	14.6969	14.1037	14.5488	14.5188	14.6248	14.5684	13.8572	14.4541	14.0795	14.3658	14.5846	14.7796	14.6238	14.6922	0.529385	0.382093	0	2	4	4	5	5	4	4	4	4	5	4	4	4	4	4	4	4	4	628.37	23781.1	20984.1	24115.8	26558.5	17605.6
H7BWZ9	4	4	Dop1a	Protein dopey-1	13.9253	12.1818	13.8399	11.6905	13.8315	13.912	14.4598	14.5719	14.7	12.192	13.9343	14.6835	14.7119	14.0372	13.906	14.9746	14.7375	14.6942	0.528717	0.258355	0	3	2	3	2	3	3	4	4	4	2	3	4	4	3	3	4	4	4	15556.8	4646.14	14663.1	3305.25	14577.5	15415
Q9QYP6	4	4	Azi2	5-azacytidine-induced protein 2	14.2416	9.26634	13.801	13.9127	13.7986	14.0537	14.1483	14.1766	14.0937	14.2759	14.0381	14.0083	13.9559	13.9812	14.0308	14.0013	14.0568	13.8953	0.52789	0.33666	0	3	1	3	3	4	4	3	3	3	3	3	3	3	4	4	3	3	3	19370.7	615.81	14273.1	15422.5	14249.4	17005
Q6NXW6	9	9	Rad17	Cell cycle checkpoint protein RAD17	12.4195	13.7925	15.4031	15.3011	13.8879	14.9846	16.3324	16.1385	15.9527	14.8981	14.6154	15.4042	14.7983	15.2632	14.9991	16.2909	16.286	16.4063	0.527702	0.300381	0	4	5	8	8	5	7	10	10	9	6	5	9	6	7	7	10	10	10	5478.16	14189	43331.8	40372.1	15159	32419.9
Q99J10	6	6	Ctu1	Cytoplasmic tRNA 2-thiolation protein 1	15.875	16.0567	16.3872	16.5568	16.2928	15.8921	14.3531	15.1575	11.0506	16.5461	16.2294	16.1516	16.3188	16.398	16.1909	14.905	14.9182	14.7002	0.526275	0.414438	0	6	6	8	8	8	6	5	7	3	8	7	7	8	8	7	7	6	5	60097.9	68160.8	85708.8	96403.4	80285.2	60814.4
P58059	4	4	Mrps21	28S ribosomal protein S21, mitochondrial	13.4194	13.2194	14.8728	14.7292	13.569	14.8419	15.9021	15.5317	15.8147	14.7146	15.048	14.8637	13.8738	15.1203	15.156	15.8621	15.8517	16.1339	0.52489	0.223951	0	2	2	3	3	2	3	4	4	4	3	3	3	2	3	3	4	4	4	10955.8	9537.47	30003.3	27159.7	12152.6	29365.9
P40338	3	3	Vhl	von Hippel-Lindau disease tumor suppressor	12.7451	8.81179	12.5288	13.2538	12.8223	13.2152	11.9108	13.019	12.0501	12.584	13.0954	13.4227	12.8648	13.0685	12.8088	12.7444	12.4685	12.0223	0.524733	0.288824	0	3	1	3	4	3	3	2	3	2	3	3	4	3	3	3	3	3	2	6865.07	449.38	5909.57	9767.95	7242.73	9509.66
Q8C790	3	3	Fam221a	Protein FAM221A	12.4073	12.3185	13.0162	12.0818	13.2714	11.5413	8.27771	10.8334	8.59006	13.0056	11.7082	13.1208	13.5705	12.3248	12.4847	11.4004	9.33756	10.101	0.523966	0.505147	0	2	2	3	2	3	2	1	2	1	3	2	3	3	2	2	2	1	1	5432.09	5108	8284.38	4335.03	9887.71	2980.37
Q9D6K8	8	8	Fundc2	FUN14 domain-containing protein 2	15.6308	13.6881	15.7943	15.6998	15.9367	15.8215	15.2312	13.1263	15.3036	16.1135	15.6344	15.2798	16.0198	16.077	16.1615	15.8332	15.1078	14.7157	0.523393	0.187675	0	6	3	6	6	6	6	6	3	4	6	5	5	6	6	6	6	4	4	50737.2	13198.3	56829.3	53224.6	62724.4	57907.6
Q9CQP2	4	1	Trappc2	Trafficking protein particle complex subunit 2	13.8077	12.497	14.1848	13.815	13.7259	14.0762	11.053	14.5782	14.5289	13.6212	11.8562	14.598	14.1425	14.2019	14.1753	14.6713	14.8115	14.8956	0.522987	0.300358	0	4	3	4	4	4	4	2	4	4	3	2	4	4	4	4	4	4	4	14339.4	5780.46	18622.4	14412.2	13549.2	17272.5
Q9WTZ0	4	4	Uxt	Protein UXT	15.0913	15.6815	15.0022	9.61147	15.2454	15.1675	15.5355	15.4647	15.6794	15.0019	15.2423	15.1977	14.996	14.8832	15.047	15.4347	15.7129	15.652	0.520975	0.435687	0	3	3	4	1	3	3	4	4	4	3	3	4	3	3	4	4	4	4	34908.4	52555	32817.3	782.24	38843.7	36802.4
A0A0R4J1F2	4	2	Psen2	Presenilin-2	11.9883	10.1279	14.6345	14.0486	14.5552	14.043	15.7535	15.5805	15.5999	14.2914	13.033	15.0344	14.0536	12.7907	14.6689	15.6965	15.7351	15.7125	0.52053	0.483459	0	2	1	4	3	4	3	3	4	4	3	2	4	3	2	4	4	4	4	4063.05	1118.95	25433.6	16945.6	24074	16879.8
Q8C5G6	3	3	Tollip	Toll-interacting protein	12.6438	12.4304	13.3906	12.1443	12.6968	13.5152	13.6592	13.585	10.531	13.6576	13.8365	12.6643	12.8453	13.0239	13.6505	14.2459	10.1474	15.207	0.520224	0.377021	0	2	2	3	2	2	3	3	3	2	3	3	2	2	2	3	3	2	4	6399.6	5519.95	10739.5	4526.77	6639.34	11708.3
Q3ZB57	6	6	Gab2	GRB2-associated-binding protein 2	14.5357	14.8381	14.6443	14.8115	14.9089	14.6737	13.6713	12.8727	9.91449	14.4464	13.9761	15.3305	14.7114	14.8612	14.9249	13.2248	13.7888	14.2815	0.519439	0.388038	0	4	4	5	4	5	5	4	3	2	4	3	6	4	5	5	4	4	4	23750.6	29288.8	25608.1	28755.3	30762.8	26134.9
Q9CQD4	6	1	Chmp1b2	Charged multivesicular body protein 1B2	17.8838	15.9155	18.3536	16.4596	16.3994	16.5988	13.434	9.72681	13.2808	16.9286	18.2434	15.2789	16.8122	17.1404	17.7633	11.8762	14.2663	14.4141	0.519033	0.654129	0	6	5	6	5	5	5	3	2	3	5	7	4	5	5	6	2	3	3	241852	61808.4	334956	90123.7	86440.6	99251
Q8VDK1	6	6	Nit1	Deaminated glutathione amidase	15.3186	13.7376	15.5737	15.5126	15.2413	15.2603	15.21	12.4818	13.908	15.4939	15.2945	15.7125	15.4543	15.5377	15.1177	14.8555	14.1703	15.2719	0.518253	0.201005	0	5	3	7	6	5	6	6	3	4	5	5	6	7	5	5	5	4	5	40865.3	13659.4	48768.8	46747.4	38734.8	39248.5
A0A494BA32	4	4	Gpam	Glycerol-3-phosphate acyltransferase 1, mitochondrial	14.152	13.9376	13.8788	10.52	14.2055	13.5135	13.9112	13.8389	14.0128	13.7768	14.2179	13.956	14.4945	14.4242	14.2516	14.0677	13.6927	13.7446	0.517308	0.2114	0	4	3	4	2	4	3	4	5	5	3	4	4	4	4	4	5	5	5	18204	15690.2	15063.9	1468.33	18892.3	11694.2
D3YUP0	4	4	Vps8	Vacuolar protein sorting-associated protein 8 homolog	10.6054	8.70884	12.7299	10.0854	13.5926	13.7462	13.8769	13.6644	13.7715	11.2369	9.07567	13.9164	13.8076	11.929	13.046	14.356	13.9694	14.0819	0.515304	0.567011	0	2	1	3	2	4	4	4	4	4	2	1	4	4	2	3	4	4	4	1557.89	418.43	6793.41	1086.41	12353.1	13741.3
Q8VCF1	5	5	Cant1	Soluble calcium-activated nucleotidase 1	10.8207	11.0239	13.2349	13.9545	14.2361	10.3159	14.4376	14.5426	14.199	12.9403	12.9115	13.9861	13.8132	13.8994	10.8247	14.3928	14.2624	14.3705	0.5151	0.468703	0	2	2	3	4	5	2	5	5	5	3	3	5	4	4	2	5	5	5	1808.66	2082.17	9640.34	15875.6	19297.6	1274.69
Q8R5I6	4	2	Gstm4	Glutathione S-transferase Mu 1	8.62176	9.25996	11.978	11.6832	11.672	9.42095	13.9802	14.1021	8.71867	9.78481	9.66308	13.4581	12.5865	9.52537	8.73512	13.2884	13.0709	13.9597	0.515023	0.611843	0	0	1	2	2	2	1	3	3	1	1	1	3	2	0	1	2	2	2		613.09	4033.97	3288.45	3262.96	685.47
Q61553	3	3	Fscn1	Fascin	14.491	13.493	14.0371	14.2662	13.2745	13.9872	11.7676	12.1734	8.84997	14.3827	14.2409	13.5697	14.045	13.7809	13.9821	12.2225	12.4328	12.3176	0.514913	0.448713	0	3	2	3	3	2	3	2	2	1	3	3	2	3	3	3	2	2	2	23026.6	11529	16811.1	19703.4	9909.14	16239.3
A0A0A0MQK3	4	4	Srebf1	Sterol regulatory element-binding protein 1	11.9759	12.0296	14.4123	13.7371	12.0096	13.929	14.3302	14.6248	14.8344	12.5014	13.8832	13.6061	14.8226	12.6402	13.5333	15.3345	15.2766	14.9143	0.51435	0.353648	0	2	2	4	3	2	3	4	4	4	2	3	3	4	2	3	4	4	4	4028.25	4180.91	21804.5	13654.3	4123.23	15597.4
O55229	4	4	Chkb	Choline/ethanolamine kinase	12.7659	14.1529	14.9161	14.5195	14.5082	12.5539	15.7702	15.1677	15.2065	15.1951	14.2359	14.9067	14.3933	14.3261	14.4659	15.5448	15.4276	15.6848	0.513257	0.229677	0	2	3	4	3	3	2	4	4	4	4	3	4	3	3	3	4	4	4	6965.07	18215.9	30916.8	23485.8	23302.6	6013.03
P50172	4	4	Hsd11b1	11-beta-hydroxysteroid dehydrogenase 1	8.62176	9.66155	10.099	9.11283	9.60433	10.8692	14.7474	14.6551	14.9983	9.18234	9.60509	9.19679	9.37608	13.1858	11.6483	15.1335	14.7736	14.8808	0.51254	0.685978	0	0	1	2	1	1	2	4	4	4	1	0	0	1	3	2	4	4	4		809.87	1096.7	553.65	778.38	1870.52
Q921Q3	3	3	Alg1	Chitobiosyldiphosphodolichol beta-mannosyltransferase	11.8244	8.92472	11.6747	11.6875	11.9023	8.49541	13.1603	13.0735	12.9686	8.68254	11.9437	12.2434	11.8913	12.4829	12.2142	13.2449	12.8469	12.7713	0.512196	0.488583	0	2	1	2	2	2	0	3	3	3	1	2	2	2	3	2	3	3	3	3626.68	485.97	3269.26	3298.19	3827.75
A0A338P6Q3	3	3	A630089N07Rik	RIKEN cDNA A630089N07 gene (Fragment)	13.2964	13.3759	12.024	13.3072	13.1095	13.22	7.77228	12.121	12.6114	12.983	13.6861	12.6663	13.0803	12.9441	13.4124	12.0652	12.7737	11.8331	0.511827	0.425058	0	3	3	2	3	3	3	1	2	3	3	3	3	3	3	3	2	3	2	10060.4	10630.3	4164.65	10136.2	8837.8	9541.62
Q9D2P4	3	3	Urm1	Ubiquitin-related modifier 1	8.62176	8.77863	7.91492	12.1726	12.0347	12.5673	8.37925	13.4698	13.8599	9.23072	12.4322	8.87141	12.1225	9.69277	9.46514	13.3335	13.9437	13.311	0.511559	0.63234	0	0	0	1	2	2	2	1	3	3	1	2	1	2	1	1	3	3	3			241.34	4616.65	4195.59	6069.37
Q9D8S4	12	12	Rexo2	Oligoribonuclease, mitochondrial	17.0206	13.6168	17.136	17.0772	17.2922	17.4022	16.2899	16.4588	16.7725	16.992	17.1528	17.0518	17.1639	17.2909	17.2831	16.8199	17.216	16.6898	0.510481	0.213774	0	9	4	11	10	11	10	9	7	8	9	8	10	11	9	10	9	8	8	132953	12562.3	144029	138279	160493	173216
Q9D211	4	4	Cdkn2aipnl	CDKN2AIP N-terminal-like protein	13.6871	12.9833	12.5693	13.7713	15.0686	14.2107	13.6843	12.3931	14.1898	12.5912	15.2051	12.8125	13.0608	16.0383	15.9001	13.1634	14.2312	14.1435	0.509864	0.347041	0	3	2	2	3	4	3	3	2	3	2	4	2	2	3	4	2	3	3	13189.2	8097.5	6077.49	13981.7	34363	18960.5
Q7TQ95	13	13	Lnpk	Endoplasmic reticulum junction formation protein lunapark	13.527	13.3639	14.8017	12.7863	13.9522	13.081	17.0495	17.286	17.3596	14.4129	14.4684	14.8144	13.3812	14.2977	14.2832	17.2922	17.5098	17.3264	0.508752	0.548501	0	6	6	8	6	7	5	9	11	11	7	7	8	6	7	7	9	11	11	11803.9	10542.4	28560.5	7064.11	15850.6	8665.28
Q9D3B1	4	4	Hacd2	Very-long-chain (3R)-3-hydroxyacyl-CoA dehydratase 2	13.9849	13.7974	13.7873	14.1954	13.9523	13.9281	11.2406	12.4565	12.3904	13.752	14.7179	14.1952	13.4605	14.2802	14.5845	13.0634	13.05	13.2054	0.508463	0.226685	0	3	4	4	4	4	4	2	3	3	3	4	4	3	4	4	3	3	4	16213.3	14237	14138.5	18761	15850.7	15587.8
C0HK79	3	2	Arxes1	Adipocyte-related X-chromosome expressed sequence 1	14.0031	10.5727	14.3275	14.2602	14.1057	14.3696	13.9897	14.3047	14.0048	14.3815	14.1356	14.3906	14.3321	14.146	14.4992	14.1845	14.1034	14.3294	0.507144	0.229142	0	2	1	3	2	2	3	3	3	3	2	3	3	3	2	3	3	3	3	16419.5	1523.01	20559.3	19622.1	17629.8	21168.6
P62245	16	16	Rps15a	40S ribosomal protein S15a	20.9203	19.8605	20.3573	20.175	20.7939	20.7661	17.7535	16.611	17.7405	20.4484	21.1572	21.0113	20.4901	21.0043	21.1564	17.7034	17.9492	18.6119	0.505983	0.493924	0	17	13	15	15	17	17	11	10	10	16	17	17	16	17	17	10	10	11	1.9845e+06	951937	1.34324e+06	1.18384e+06	1.81803e+06	1783337
E9PYD1	7	7	Fam98c	Family with sequence similarity 98, member C	13.1921	13.2228	13.9342	12.8792	13.8266	12.8328	15.2885	13.7795	13.827	12.8616	13.9201	14.1073	13.7181	13.9039	13.7998	14.8381	14.8695	15.309	0.50498	0.170566	0	3	3	5	3	5	3	6	4	4	3	4	5	4	4	4	5	6	6	9358.69	9559.82	15653.9	7533.74	14528.1	7295.56
Q99LJ1	5	5	Fuca1	Tissue alpha-L-fucosidase	14.4319	13.8615	13.3379	13.3632	14.0429	14.1781	14.0905	14.2669	13.7426	13.2495	15.5285	14.2106	13.6667	15.4457	14.3849	14.1294	15.2287	14.0158	0.504907	0.108228	0	3	2	2	2	3	3	3	3	3	2	4	3	2	4	3	3	4	3	22101.9	14884.1	10354	10537.1	16878.6	18537
Q9QXE2	3	3	Poll	DNA polymerase lambda	10.1819	10.1774	8.30366	12.8261	10.2547	9.71435	15.3495	13.2283	14.5599	13.1211	10.7829	10.2522	10.3294	10.3795	10.3801	14.2554	14.6252	15.0126	0.504752	0.642581	0	1	1	0	2	1	1	3	2	3	2	1	1	1	1	1	2	3	3	1161.61	1157.97		7261.5	1221.75	840.06
Q8K2Q0	5	5	Commd9	COMM domain-containing protein 9	13.9247	13.8933	13.64	13.6334	15.1572	14.9986	14.7186	15.9403	15.7742	14.782	14.7719	13.5405	14.7761	15.0491	16.2174	15.851	16.0642	15.1668	0.5043	0.233524	0	3	3	3	3	5	5	5	6	6	5	4	3	4	5	6	6	6	5	15550.3	15215.7	12766.2	12707.9	36539.7	32735.5
Q8R0K9	7	7	E2f4	Transcription factor E2F4	14.5847	13.1772	12.3813	14.651	14.4433	15.0342	14.9771	14.8269	15.2708	15.0604	14.5525	15.1872	14.2731	14.5501	14.4639	15.4512	15.1482	15.1922	0.503579	0.16715	0	4	3	3	5	5	5	5	4	5	6	5	6	5	5	5	6	5	6	24572.2	9262.75	5335.19	25727.3	22278.2	33553.5
Q0VEJ0	3	3	Cep76	Centrosomal protein of 76 kDa	11.6157	9.40361	12.071	11.5566	11.2963	8.75231	12.2312	11.9872	13.4165	9.41327	12.5667	12.8818	11.9575	9.92043	9.81052	13.4447	13.3981	13.4683	0.503417	0.506884	0	2	1	2	2	2	1	2	2	3	1	2	3	2	1	1	3	3	3	3138.23	677.28	4302.62	3012.27	2514.88	431.23
Q64433	19	19	Hspe1	10 kDa heat shock protein, mitochondrial	19.8544	18.1764	20.2355	19.3867	20.4239	20.4578	14.7689	14.9749	14.1298	19.8157	20.3024	19.8902	19.6603	20.5088	20.2236	15.7842	14.6535	16.0886	0.502117	0.675873	0	19	17	20	19	20	21	10	11	9	19	18	20	19	19	20	12	10	13	947908	296231	1.23451e+06	685473	1.40669e+06	1.44016e+06
Q8CG50	8	6	Rab43	Ras-related protein Rab-43	15.0967	15.8757	15.586	15.6362	15.8595	15.6448	15.3186	15.211	13.8141	16.3993	15.6827	15.8838	15.9933	16.2119	16.4707	15.1956	15.3177	15.4022	0.501647	0.0746117	0	4	5	7	7	7	6	5	5	4	8	5	7	7	6	8	5	6	7	35038.7	60124.7	49186.2	50927.7	59452.7	51231.8
E9Q286	4	4	Ice1	Little elongation complex subunit 1	13.3681	13.279	13.3165	13.4306	12.3452	12.9754	11.8876	13.2236	14.1401	13.3749	14.0918	13.2395	13.4046	12.9799	13.3222	14.1066	13.9168	14.0369	0.50079	0.0724237	0	3	3	3	3	2	3	2	3	4	3	4	3	3	3	3	4	4	4	10573	9939.6	10201.3	11041.5	5203.2	8053.35
O88587	6	6	Comt	Catechol O-methyltransferase	15.998	11.0653	15.7904	16.1011	16.0408	15.7879	14.8918	15.2971	14.5441	16.0324	15.6553	15.8515	15.6219	15.7236	15.6913	15.1466	15.2373	15.0636	0.50078	0.369596	0	5	2	5	5	5	5	5	5	4	5	4	5	5	5	5	5	6	5	65443.8	2142.85	56675.9	70291.9	67417.5	56574.9
Q9JIW9	6	3	Ralb	Ras-related protein Ral-B	14.563	13.2576	14.8265	13.0898	14.5659	14.9311	16.6884	16.2771	16.4453	15.1862	14.7773	15.0569	14.7693	14.2918	14.4428	16.7225	16.8015	17.0998	0.500387	0.39226	0	4	3	4	3	4	4	6	6	6	5	4	5	4	4	4	6	6	6	24205	9793.29	29055.7	8718.32	24253.4	31240.7
Q8VC16	3	3	Lrrc14	Leucine-rich repeat-containing protein 14	10.8411	13.3337	13.4212	13.5667	13.3261	10.4972	13.6609	13.8225	13.7245	12.9088	11.4825	13.8882	13.8672	11.7735	14.3501	14.2383	13.9894	14.1441	0.494249	0.392102	0	2	3	4	4	3	2	4	4	4	3	2	4	4	2	4	4	4	4	1834.41	10324	10969.2	12133.6	10269.6	1445.35
Q9DBU5	7	7	Rnf6	E3 ubiquitin-protein ligase RNF6	12.0958	13.8301	13.8027	13.9825	9.46336	13.6862	14.5066	14.5234	14.665	14.4067	13.9239	14.3811	13.9267	12.1164	12.4241	14.6866	14.9205	14.2155	0.493984	0.452728	0	4	5	6	5	1	5	7	8	7	7	5	7	6	3	4	7	8	7	4377.22	14564.2	14289.6	16187	705.92	13181.3
Q9JHT5	6	4	Ammecr1	Nuclear protein AMMECR1	14.3813	13.2038	13.9624	14.0737	14.296	14.6035	12.0217	11.9667	12.4711	14.5555	14.0742	13.8519	14.5843	14.5871	14.6699	13.1328	13.0904	12.8738	0.493305	0.264543	0	5	3	5	4	5	6	3	3	3	5	4	5	5	4	5	3	3	3	21340.5	9434.87	15962.8	17243	20115.5	24894.5
P48972	3	2	Mybl2	Myb-related protein B	14.1662	14.3398	12.9762	13.9264	12.9376	12.4086	8.6605	7.58248	12.5196	13.7104	13.9228	13.2968	14.4681	13.3401	13.069	10.0691	9.2057	12.8725	0.493042	0.629272	0	3	3	2	3	2	2	1	1	2	3	3	2	3	2	2	1	1	2	18384	20735	8057.8	15568.6	7845.3	5436.83
P18893	3	3	Il10	Interleukin-10	11.9282	12.2493	8.30366	11.7697	12.0961	14.0729	15.0502	15.7446	16.2644	11.9261	12.7574	12.4033	12.2712	12.8427	12.49	16.4773	15.9302	14.8099	0.492101	0.632315	0	1	1	0	1	1	2	2	2	3	1	1	1	1	1	1	3	3	3	3897.1	4868.49		3491.61	4378.21	17233.1
A0A0R4J1B6	12	12	Dennd5a	DENN domain-containing protein 5A	14.8273	13.62	14.8942	14.2578	15.0426	13.2459	15.2504	15.23	15.7693	14.2018	14.9262	15.2091	14.1015	14.4854	15.0406	15.3415	16.6793	16.5724	0.491155	0.251522	0	7	5	8	6	7	5	10	10	11	6	7	9	6	6	8	10	12	12	29071	12590.2	30450.8	19589.7	33749.6	9714.05
J3QN94	3	3	Trim26	Tripartite motif-containing protein 26	13.0915	13.2601	12.9019	7.76573	12.9262	13.3197	13.3039	13.1043	13.2672	13.1998	13.3277	12.3227	13.1478	13.1559	13.1172	13.0139	13.1583	12.9169	0.491066	0.431143	0	3	3	3	1	3	3	3	3	3	3	3	2	3	3	3	3	3	3	8728.41	9810.44	7653.3	217.63	7783.64	10224
Q91V35	6	4	Ptpra	Receptor-type tyrosine-protein phosphatase alpha	13.7554	13.5689	15.1499	15.3205	15.3668	15.6786	15.9318	15.1559	15.7314	15.6491	15.5537	15.6819	15.6848	14.2483	14.9869	15.9254	16.1218	16.2267	0.491038	0.176395	0	3	3	5	4	5	5	5	4	5	5	4	6	6	3	4	5	5	5	13829	12151.8	36354.8	40919.5	42253.2	52449
Q60989	4	4	Xiap	E3 ubiquitin-protein ligase XIAP	12.6878	12.8838	13.7847	12.4319	13.8418	12.2972	15.1219	15.0721	15.3659	13.0374	14.0194	15.1351	13.4671	13.8139	13.8349	13.6727	15.7716	15.1497	0.490537	0.350061	0	2	2	3	2	3	2	4	4	4	2	3	4	2	3	3	3	4	4	6598.04	7557.94	14112.8	5525.41	14682.6	5032.84
P41272	4	4	Cd27	CD27 antigen	12.076	12.5389	7.59201	13.284	8.9987	12.8482	15.5201	15.3149	15.0474	13.1597	12.6782	12.8289	13.3101	9.24336	12.1116	15.7594	14.2162	14.326	0.490344	0.660983	0	2	2	1	3	1	3	3	3	3	2	2	2	3	1	2	4	3	3	4317.51	5951.01	192.94	9974.44	511.54	7374.04
Q9CQP0	4	4	Mrpl33	39S ribosomal protein L33, mitochondrial	16.1804	12.0909	16.0593	16.0104	16.3612	16.1743	15.0302	15.1004	15.1781	16.0268	16.2529	16.2602	16.3694	16.2278	16.4379	15.0419	15.1	14.8778	0.489926	0.334161	0	5	2	6	4	5	5	4	4	5	5	4	6	6	5	5	5	5	5	74265.5	4362.27	68288.2	66011.9	84178.2	73953.8
P17225	25	21	Ptbp1	Polypyrimidine tract-binding protein 1	21.9627	21.2796	22.144	21.8252	22.001	22.2929	19.9736	19.7263	19.4481	21.6887	22.7704	21.9485	22.0713	22.3167	22.6385	20.5854	20.2745	20.7671	0.48974	0.331169	0	23	19	26	23	24	25	15	14	14	22	26	24	25	25	26	17	15	18	4.08737e+06	2545718	4634619	3715643	4197093	5138492
Q9CZX8	17	17	Rps19	40S ribosomal protein S19	20.5395	20.7094	21.2959	21.4389	21.9835	21.9986	18.0256	18.1894	19.8725	21.5962	22.0712	21.6618	21.4507	22.0271	22.2202	18.114	19.6681	19.6386	0.488271	0.490417	0	13	14	16	16	16	16	9	10	11	16	16	16	16	16	17	11	10	11	1.52411e+06	1.71458e+06	2.57459e+06	2.84292e+06	4.14672e+06	4.19034e+06
A0A087WQ32	3	3	Pign	GPI ethanolamine phosphate transferase 1	13.946	9.0124	14.195	14.3743	14.1255	13.8835	13.5932	13.8782	13.0612	13.9934	13.3426	14.1151	14.0574	13.9305	13.9559	13.5496	13.6792	13.8319	0.487347	0.398912	0	3	1	3	3	3	3	2	3	2	3	2	3	3	3	3	3	3	3	15782	516.42	18755	21237.7	17873.4	15112.5
Q8R3H7	4	4	Hs2st1	Heparan sulfate 2-O-sulfotransferase 1	9.42087	9.52225	11.8357	12.1941	14.4406	11.9452	13.6592	15.1281	14.8575	13.8782	12.8304	13.7732	9.78823	12.6688	10.0711	15.5373	15.1107	13.7317	0.487339	0.62426	0	1	1	2	2	3	2	3	4	4	3	2	3	1	2	1	4	4	3	685.43	735.33	3655.23	4685.72	22236.5	3943.24
Q0VBD2	6	6	Mcm10	Protein MCM10 homolog	14.8372	14.3668	14.6221	14.8705	14.6591	14.5739	8.81352	13.4738	13.8782	14.819	14.195	14.5316	14.6909	14.9452	14.2305	12.7975	14.6085	13.6595	0.486959	0.483624	0	5	4	4	4	4	4	2	4	4	6	4	5	5	5	3	3	6	4	29270.5	21127.3	25216.8	29954	25871.2	24389.1
P06332	13	13	Cd4	T-cell surface glycoprotein CD4	18.3462	17.6442	18.047	18.0397	17.9739	17.9184	16.1448	15.8388	15.4322	18.5031	17.6885	18.2839	18.2491	18.0703	18.3363	16.0298	16.8202	17.7819	0.486408	0.309733	0	13	11	14	13	13	14	9	8	9	15	12	15	14	15	15	9	9	12	333240	204854	270832	269461	257450	247729
Q4VBD9	5	5	Gzf1	GDNF-inducible zinc finger protein 1	13.8584	13.8571	13.6081	13.2884	13.7563	13.5676	12.1888	7.87811	12.4665	13.5259	13.9382	13.8393	13.2718	13.7	13.4689	12.3646	12.1415	12.5924	0.485907	0.482345	0	5	4	5	4	5	5	3	2	4	4	5	5	4	4	4	3	3	3	14852.4	14838.9	12487	10005	13838	12140.8
Q99LU0	6	1	Chmp1b1	Charged multivesicular body protein 1B1	17.8199	15.9762	18.1937	16.4054	16.4095	16.3748	13.3336	9.80025	13.0827	16.8001	18.0956	15.2034	16.7048	17.0403	17.6757	11.7583	14.0847	14.3758	0.48254	0.674479	0	6	5	6	5	5	5	3	2	3	5	7	4	5	5	6	2	3	3	231376	64465	299819	86798.8	87045.6	84975.1
A0A087WRE5	6	5	Nudt16	Tudor-interacting repair regulator protein	12.0404	10.9226	13.0829	10.5654	10.8965	10.6026	15.7479	14.4304	14.5905	12.0667	11.2217	11.8359	12.0705	10.6781	12.1773	15.9368	15.9526	15.2789	0.482141	0.62255	0	3	2	4	2	2	2	6	5	5	3	2	3	3	2	3	6	6	5	4212.25	1941	8676.65	1515.35	1906.16	1554.94
Q9ERI2	5	4	Rab27a	Ras-related protein Rab-27A	14.9401	12.6171	15.449	15.3339	15.425	16.0126	17.2719	16.6455	16.7721	15.5206	15.8501	15.5575	15.751	15.8103	15.4863	17.0951	16.8545	16.8737	0.481322	0.354188	0	4	2	4	5	5	5	4	4	5	4	5	4	5	5	5	4	4	4	31435.2	6282.53	44730.7	41300.3	43992.7	66109.9
Q9CX00	10	10	Ist1	IST1 homolog	16.5624	15.1266	16.6993	16.3805	16.5132	17.3772	17.7143	16.5234	16.8583	16.903	16.4488	16.6154	16.09	17.187	16.5664	17.7605	18.0392	18.4669	0.480214	0.200998	0	6	4	6	6	6	7	7	5	7	7	5	6	5	7	6	7	7	7	96780.1	35774.4	106412	85313.3	93531.5	170240
Q8BHA3	3	3	Dtd2	D-aminoacyl-tRNA deacylase 2	14.7482	12.6662	14.4212	14.6666	12.1928	14.3424	15.0724	15.1738	14.7177	15.1914	14.9879	14.959	14.4964	14.3108	13.0227	15.2913	15.0832	14.9712	0.479171	0.274473	0	4	2	3	3	2	3	4	4	3	4	4	4	3	3	2	3	4	3	27520.6	6500.09	21939.3	26007.3	4681.52	20773
A0A494BAT2	4	4	Cuedc2	CUE domain-containing protein 2	9.89049	9.86799	10.5325	9.54442	8.93496	9.42274	15.1973	14.0158	14.658	13.8111	9.84053	9.40418	9.87719	9.41342	8.99149	14.5409	15.2415	15.2309	0.47635	0.70838	0	1	1	2	1	1	1	3	3	4	3	1	1	1	1	1	4	3	3	949.15	934.46	1481.15	746.72	489.43	686.32
Q60766	11	11	Irgm1	Immunity-related GTPase family M protein 1	14.6218	14.0258	15.2437	13.3626	15.1802	16.1287	16.5298	16.1565	16.2818	15.7667	15.7657	15.2478	15.2514	15.9198	15.378	16.3249	16.2117	15.9486	0.475974	0.24096	0	6	5	8	5	7	10	9	9	9	10	7	8	8	10	9	8	9	8	25210.9	16679.7	38797.3	10533.1	37127.8	71650.6
D3YY50	3	3	Cutc	Copper homeostasis protein cutC homolog	12.1559	11.4716	11.4533	8.87596	11.6032	11.7036	11.8361	11.2019	11.6259	11.4849	11.9853	11.467	11.9474	12.1976	12.252	11.2709	11.5931	12.0073	0.475313	0.180828	0	2	2	2	1	2	2	2	3	3	2	2	2	2	2	2	3	3	3	4563.55	2839.84	2804.13	469.82	3110.99	3335.23
Q9CQL0	4	4	Mettl21A	Protein N-lysine methyltransferase METTL21A	14.1823	14.4405	13.9366	14.3299	14.0476	14.277	9.49819	13.8644	13.5237	14.3057	14.3042	14.4149	14.5727	14.6129	14.2988	13.2122	13.4863	13.1679	0.47505	0.402324	0	4	4	4	4	4	4	2	4	4	4	4	4	4	4	4	4	4	4	18590.9	22234.1	15679.3	20593.6	16933.9	19852.1
P97314	3	3	Csrp2	Cysteine and glycine-rich protein 2	14.6216	14.7008	14.3977	14.0307	14.1591	14.0384	13.6135	11.4199	13.5778	14.8984	14.3018	14.5613	14.6746	14.4463	14.431	13.8398	13.6934	13.9704	0.473044	0.202192	0	4	4	4	3	3	4	4	2	3	4	3	4	4	4	4	3	3	4	25208.1	26630	21584.9	16736.2	18294.7	16825.7
Q8VD31	6	6	Tapbpl	Tapasin-related protein	8.20745	8.42601	11.7983	10.3874	8.47298	13.2415	15.7415	14.5955	14.7667	11.8289	10.533	7.95018	10.9947	11.7657	11.2408	15.2938	14.891	15.3876	0.472038	0.721694	0	1	1	3	2	1	4	8	6	6	3	2	1	2	3	2	7	7	7	295.59	343.94	3561.63	1339.47	355.32	9684.43
Q8CFE6	4	4	Slc38a2	Sodium-coupled neutral amino acid symporter 2	12.5806	12.6421	13.7387	12.3254	12.804	14.695	14.6994	15.2241	15.4173	13.2627	12.7285	14.6807	13.3459	14.8441	13.9522	15.6918	15.2598	14.5966	0.470615	0.387471	0	2	2	3	2	2	4	4	4	4	3	2	4	3	4	4	4	4	4	6125.29	6392.38	13670	5132.3	7151.38	26524.1
Q80X71	8	8	Tmem106b	Transmembrane protein 106B	14.6075	15.2213	14.7949	14.4802	13.7641	14.4589	16.7118	15.8337	16.0868	15.2816	14.7813	14.9776	15.355	15.2717	15.028	16.3439	16.435	16.7168	0.470173	0.250338	0	4	5	5	4	3	4	8	7	7	6	4	5	5	5	5	7	8	8	24963.1	38201.3	28425.5	22854.6	13912.7	22519
A0A0R4J256	7	7	Psmb9	Proteasome subunit beta type-9	14.1098	14.1543	16.249	15.9821	15.3859	16.7453	18.5155	17.0857	17.4828	16.2261	16.599	16.2539	15.5939	15.4554	15.5999	18.0418	17.9044	18.2623	0.469584	0.457994	0	3	3	5	5	4	6	6	5	6	5	6	5	4	4	4	6	6	6	17680.1	18232.9	77880.5	64726.8	42818.5	109862
P49769	4	2	Psen1	Presenilin-1	11.0464	9.40363	12.8019	15.2319	14.9948	15.1007	14.3266	14.7987	14.8213	14.678	12.7048	15.7491	9.30542	12.662	15.2626	15.5179	15.4177	15.4343	0.467343	0.646588	0	2	1	2	4	3	4	2	3	3	3	2	4	1	2	3	3	3	3	2114.94	677.29	7140.91	38481.7	32649.1	35136.7
P26516	15	15	Psmd7	26S proteasome non-ATPase regulatory subunit 7	20.1005	19.6012	19.7622	19.9416	20.1162	20.1784	17.3605	14.2912	17.3282	20.003	20.1021	20.066	19.9305	20.2067	20.2308	17.4754	17.3072	17.5628	0.467172	0.570297	0	18	16	17	18	18	18	10	9	10	18	18	18	18	19	19	11	10	13	1124198	795333	889243	1.00695e+06	1.1365e+06	1.18659e+06
O09130	5	5	Nfatc2ip	NFATC2-interacting protein	12.5252	15.3929	15.6981	15.2786	12.5744	15.4875	15.8535	15.9381	15.8968	15.7276	15.3072	14.7054	15.4572	15.5773	15.4326	14.8433	15.8569	15.9416	0.467096	0.34799	0	2	3	5	3	2	4	5	5	5	5	4	3	4	4	5	3	5	5	5894.85	43026.3	53163.5	39747.1	6099.1	45941.2
A0A2I3BQW0	3	3	Asxl1	Polycomb group protein ASXL1	9.07879	13.3253	13.1907	13.0954	12.9657	13.4314	12.4691	12.8636	12.6098	13.3774	13.6045	12.8718	13.4131	13.4552	13.1196	12.2918	12.7673	12.3306	0.466841	0.341548	0	1	2	2	2	2	2	3	3	3	3	3	2	3	3	3	3	3	3	540.74	10264.3	9349.85	8751.79	7999.27	11047.1
D3Z1C5	5	5	Ldb1	LIM domain-binding protein 1	14.8281	15.0096	14.9356	14.8898	14.3131	12.3339	14.6399	14.8995	14.7927	14.7453	15.3603	14.8158	14.9396	14.53	14.8515	14.6438	15.553	15.388	0.464991	0.148464	0	3	3	3	3	3	2	3	4	4	3	4	3	3	3	3	3	5	4	29086.5	32987.2	31337.9	30357.7	20355.5	5162.75
Q3V493	5	5	Trappc4	Trafficking protein particle complex subunit 4	14.8578	12.5809	14.5038	14.647	12.4668	15.2401	14.9798	15.3465	15.3979	15.1589	15.1245	14.5898	14.5854	14.68	14.4247	15.0756	15.2432	15.3096	0.463444	0.256029	0	3	2	3	3	2	4	4	4	5	4	4	3	3	3	3	4	5	5	29692	6126.57	23231.3	25656.3	5660.89	38701.1
F6R9A8	4	4	Zfp958	Zinc finger protein 958	12.3548	13.6875	13.2569	13.3537	13.1748	12.7935	10.3343	10.2973	12.3965	13.5794	14.297	13.5622	12.3849	13.4391	12.3691	11.7517	11.7142	12.7153	0.462644	0.383413	0	2	4	4	4	3	3	2	2	3	3	4	3	2	3	2	2	2	3	5237.88	13193.3	9788.69	10467.8	9246.94	7099.6
P19253	20	20	Rpl13a	60S ribosomal protein L13a	20.5481	18.5024	21.0056	20.243	21.2956	21.4149	15.4087	14.7898	15.0951	20.3629	21.0539	20.6142	20.3844	21.183	21.2105	15.3035	15.5784	16.7643	0.461325	0.719594	0	19	15	20	18	20	21	11	11	10	19	20	20	18	19	20	10	11	13	1.53319e+06	371352	2.1053e+06	1.24092e+06	2.57399e+06	2.79599e+06
Q9Z2U4	4	2	Elf4	ETS-related transcription factor Elf-1	11.0162	10.8128	15.0047	13.7993	12.3763	12.3422	16.661	14.9912	15.7175	14.0753	11.5894	14.7633	14.0021	11.2964	12.6192	15.9664	15.9764	16.582	0.461025	0.634837	0	2	2	6	4	3	3	5	4	5	4	2	5	4	2	3	6	5	5	2071.09	1798.74	32875.6	14256.5	5316.58	5192.37
A0A140LIF0	6	6	Coq7	5-demethoxyubiquinone hydroxylase, mitochondrial	15.9193	16.5559	16.4306	13.5498	16.9251	13.6863	17.8012	17.0872	17.333	17.2712	14.4172	17.1264	17.0238	15.6801	15.4198	17.1225	17.809	17.5563	0.459789	0.481397	0	3	3	3	2	4	2	5	4	5	4	2	4	3	3	3	4	5	4	61969.2	96340.8	88326.7	11992.2	124441	13182.5
Q9JJC6	4	3	Rilpl1	RILP-like protein 1	13.5588	13.4452	14.4978	13.4341	14.1352	15.154	15.2026	14.7842	14.3882	15.1341	14.3786	14.6155	14.665	14.4224	14.4764	15.0692	14.4893	15.4777	0.458692	0.10324	0	3	2	3	3	3	3	4	4	4	4	3	3	3	3	3	4	3	4	12066.9	11153.8	23134.4	11067.6	17993.9	36458.5
A2AAE1	8	8	Bltp1	Bridge-like lipid transfer protein family member 1	13.0673	9.58778	12.964	13.1302	13.0467	13.8133	15.0251	13.9738	15.0674	14.146	11.1828	13.9455	13.0547	13.4252	14.1899	14.3798	14.2088	15.2705	0.458624	0.496966	0	4	1	4	4	4	5	8	7	8	6	2	5	4	5	7	7	7	8	8583.4	769.5	7990.03	8966	8461.73	14395.1
Q9JKP8	3	3	Chrac1	Chromatin accessibility complex protein 1	12.1012	9.24113	12.9253	9.02799	14.5229	14.1721	13.0953	13.3615	13.0504	9.72042	13.718	9.98465	13.6124	14.4848	14.1055	13.3973	13.1869	13.4115	0.458182	0.608937	0	2	1	2	1	3	3	2	2	2	1	2	1	2	3	3	2	2	2	4393.7	605.14	7778.8	522.03	23541.3	18459.8
Q9R1C0	4	4	Taf7	Transcription initiation factor TFIID subunit 7	13.5573	11.7255	11.237	12.2972	13.3447	13.1262	14.1934	13.9283	14.3299	11.8637	12.6051	14.0021	12.2295	12.307	13.3705	14.979	15.1095	15.3895	0.457361	0.447038	0	3	2	2	2	3	3	3	4	4	2	2	3	2	2	3	4	4	4	12054.4	3386.21	2413.69	5033.12	10402.9	8940.58
O35744	3	3	Chil3	Chitinase-like protein 3	8.62176	8.77863	8.30366	8.35652	8.97386	8.49541	12.5654	12.9045	12.3333	9.08562	9.60509	9.19679	9.47488	9.52537	9.38718	12.1306	13.2873	11.7481	0.456438	0.599633	0	0	0	0	0	0	0	2	3	2	0	0	0	0	0	0	2	3	2
Q3U269	4	4	Tstd2	Thiosulfate sulfurtransferase/rhodanese-like domain-containing protein 2	13.5921	13.7171	13.3369	13.3868	13.1515	13.527	11.6582	9.72649	12.0106	14.1069	13.8114	13.7301	13.8682	11.8816	14.146	12.3731	12.1025	12.1324	0.449492	0.423184	0	4	4	4	4	4	4	3	2	3	4	4	4	4	2	4	3	3	3	12349.2	13466.9	10346.7	10710.8	9099.23	11803.9
P70353	5	5	Nfyc	Nuclear transcription factor Y subunit gamma	15.0053	14.5854	15.2937	15.0958	15.756	15.5417	13.7346	13.9924	14.497	15.3952	15.1321	15.503	15.5632	15.798	15.7827	14.8194	14.7617	14.7859	0.448801	0.113182	0	4	3	5	4	5	4	3	3	4	5	4	5	5	5	5	4	4	4	32889.7	24582.8	40167.3	35018	55339.4	47699.2
Q91W53	5	5	Golga7	Golgin subfamily A member 7	15.0075	13.5301	14.7224	14.5378	13.6546	11.4895	16.5352	16.3136	16.769	11.4399	15.6113	15.2067	14.9447	14.0098	15.0548	16.5858	16.9364	16.8058	0.448413	0.584402	0	4	3	4	4	3	2	6	6	6	2	5	4	4	3	4	5	6	6	32938.2	11829.1	27032.7	23785.3	12895.6	2875.26
Q9CRB1	8	8	Lgals7	Galectin	19.2467	18.3921	18.9399	18.5665	18.3284	17.9807	13.2173	12.3388	12.6289	18.2553	18.6216	18.5538	18.7653	18.1794	18.2738	13.749	13.7759	15.4673	0.444678	0.718593	0	9	8	9	9	9	7	4	4	3	8	8	8	9	8	8	4	4	6	622075	344020	502890	388220	329164	258658
Q80V24	4	4	Vgll4	Transcription cofactor vestigial-like protein 4	13.1048	12.7555	12.9128	12.1299	12.0244	11.605	13.6774	13.5327	13.8549	12.549	12.5594	11.8427	13.2177	12.9892	12.8212	14.3701	14.4377	14.8019	0.443495	0.316607	0	3	2	3	2	2	2	4	4	4	2	2	2	3	3	3	4	4	4	8809.04	6915.04	7711.42	4481.84	4165.93	3115.05
Q8BUE4	3	3	Aifm2	Ferroptosis suppressor protein 1	9.89789	9.91846	9.44758	9.70962	9.88737	9.53836	15.0089	14.7693	14.4227	13.5048	10.2237	9.58124	9.79821	10.0631	9.92892	14.6757	14.3896	14.4261	0.443469	0.701656	0	1	1	1	1	1	1	3	3	3	2	1	1	1	1	1	3	3	3	954.03	967.73	698.24	837.31	947.1	743.59
Q8BUV6	6	6	Lsm11	U7 snRNA-associated Sm-like protein LSm11	12.9196	13.0466	16.2731	15.4034	16.1767	16.1681	16.2216	16.1927	16.4301	15.7918	15.3142	16.3566	15.4856	16.0561	15.3496	15.7833	16.2912	16.3861	0.442514	0.382198	0	3	3	6	5	6	6	6	6	6	5	4	6	5	6	4	5	6	6	7748.14	8460.67	79192.7	43339.9	74076	73633.3
P60898	3	3	Polr2i	DNA-directed RNA polymerase II subunit RPB9	15.4	15.9986	15.3595	15.5416	15.5889	15.6134	11.1096	10.608	12.9045	16.081	15.9264	15.6815	15.9357	15.8581	15.7313	12.3126	11.5423	13.0378	0.442512	0.641508	0	4	4	4	4	4	4	2	2	3	4	4	4	4	4	4	3	2	3	43238.3	65474.7	42041	47697.2	49286.3	50130.3
P35505	4	4	Fah	Fumarylacetoacetase	14.1596	11.192	14.7127	14.3649	14.8207	14.7521	15.0541	14.9626	14.5449	14.9287	14.6291	15.1171	14.838	14.7423	14.6253	14.7318	14.3557	14.5757	0.442246	0.290456	0	3	2	4	3	4	4	4	4	4	4	4	4	4	4	4	4	4	4	18301.1	2339.46	26850.6	21099.1	28937.8	27594.3
P48760	3	3	Fpgs	Folylpolyglutamate synthase, mitochondrial	13.1752	8.7937	13.5541	13.8119	12.8732	13.3809	13.0253	13.0456	13.8541	13.576	13.6548	13.5263	13.3046	13.4584	13.227	13.6109	13.189	11.9457	0.442049	0.431044	0	2	1	3	3	2	2	2	2	3	3	3	3	3	3	3	2	2	2	9250.05	443.78	12028.2	14381.6	7502.94	10667.3
P30282	3	3	Ccnd3	G1/S-specific cyclin-D3	12.8018	10.7158	12.8797	10.3623	10.5235	13.8722	14.7898	14.4501	15.1337	13.9658	13.2616	11.2108	13.8435	10.919	11.2716	14.9532	14.7958	15.2817	0.441554	0.612239	0	2	1	2	1	1	2	3	3	3	2	2	1	2	1	1	3	3	3	7140.67	1681.77	7536.66	1316.31	1471.98	14995.2
A3KGB4	4	4	Tbc1d8b	TBC1 domain family member 8B	11.269	13.633	14.1012	10.9598	14.4281	10.9161	15.0387	14.958	15.0177	12.0555	12.0402	14.7061	14.8884	12.3211	12.0034	15.5164	15.483	15.2774	0.441104	0.594603	0	2	3	4	2	4	2	4	4	4	2	2	4	4	2	2	4	4	4	2467.7	12704.4	17574	1991.75	22044	1932.27
Q8BFQ8	4	4	Gatd1	Glutamine amidotransferase-like class 1 domain-containing protein 1	12.4561	12.7042	13.5962	12.1213	13.1968	12.0999	14.9562	14.4692	14.7671	12.8241	12.815	12.6576	12.7333	12.6933	12.6384	15.8259	16.0315	16.0987	0.438985	0.51643	0	2	2	3	2	3	2	4	4	4	2	2	2	2	2	2	4	4	4	5619.04	6673.25	12384.4	4455.28	9389.18	4389.74
Q9Z1B5	8	8	Mad2l1	Mitotic spindle assembly checkpoint protein MAD2A	15.0752	14.0372	17.1758	16.0341	15.8552	16.8315	17.519	16.8349	17.4108	16.796	14.4152	17.1658	16.4819	15.1568	16.0452	18.0707	18.3486	18.2423	0.438767	0.477547	0	4	3	8	5	5	7	7	7	8	6	3	8	7	4	5	7	7	7	34521.5	16811.5	148056	67103.8	59278.8	116623
Q9CQK7	6	6	Rwdd1	RWD domain-containing protein 1	14.8248	10.2107	14.4271	14.855	14.6569	14.5974	14.8911	14.4333	14.9597	14.8901	13.9407	14.3749	14.9141	14.6712	14.5217	14.79	14.9977	14.698	0.438026	0.407942	0	6	2	5	5	5	5	6	6	7	5	4	4	6	5	5	6	7	6	29021.1	1185.02	22028.8	29635.3	25832.5	24789.2
A0A0A0MQ68	3	3	Gcdh	Glutaryl-CoA dehydrogenase, mitochondrial	14.2275	10.2136	14.2245	9.2791	14.1798	14.1254	13.4602	13.5655	13.3462	13.986	14.3545	13.9654	14.4293	14.2471	14.1269	9.67117	13.0314	12.7453	0.437233	0.592938	0	3	1	3	1	3	3	2	2	2	3	3	3	3	3	3	1	2	2	19182.4	1187.44	19142.3	621.28	18558.6	17871.8
A0A1W2P7J4	4	2	Atad2b	ATPase family, AAA domain containing 2B (Fragment)	14.5973	14.8629	14.5519	8.65439	14.918	11.6612	15.099	15.2227	15.3265	14.7181	15.0035	14.5818	15.2434	9.25127	14.7639	15.2478	14.8819	15.1282	0.436196	0.663879	0	3	3	3	1	4	2	4	4	4	3	3	3	4	1	3	4	4	4	24787.7	29798.4	24020	402.93	30956.6	3238.71
A8Y5H7	5	5	Sec14l1	SEC14-like protein 1	11.9088	14.3024	13.9289	14.0026	11.9569	13.7229	14.707	14.787	15.0006	14.5127	13.9762	14.1767	13.79	13.7177	13.8034	14.8862	14.7319	14.6474	0.436126	0.304442	0	2	3	3	3	2	3	5	4	5	4	3	4	3	3	3	5	5	4	3845.08	20205	15595.9	16413.6	3975.38	13521.1
A0A140T8R5	3	3	Jade3	Protein Jade-3	13.2708	13.3419	13.4106	13.3692	13.2085	13.5463	7.68601	6.26266	7.32337	13.4978	13.4097	13.0477	13.1911	13.3475	13.4565	10.4289	6.9273	8.01731	0.433853	0.754289	0	2	2	3	3	2	3	1	1	1	3	3	2	3	2	3	2	1	1	9883.33	10382.5	10889	10581.4	9465.45	11962.7
P47963	17	17	Rpl13	60S ribosomal protein L13	21.2603	20.1922	21.3721	21.224	21.4516	21.4005	15.5882	15.0371	14.9396	21.2604	21.4223	20.9045	21.1662	21.4955	21.4511	16.7293	15.2721	16.6685	0.43381	0.746527	0	19	16	20	21	20	20	12	11	11	21	20	19	20	20	22	13	12	14	2511847	1.19802e+06	2714153	2.44936e+06	2.868e+06	2768261
Q9D404	4	4	Oxsm	3-oxoacyl-[acyl-carrier-protein] synthase, mitochondrial	14.9759	15.0512	15.1698	14.7532	14.8103	15.1033	11.8477	15.0945	14.7538	15.323	15.3443	15.3351	15.3223	14.9363	15.1848	14.7797	14.9416	14.2925	0.433316	0.258251	0	4	4	5	3	4	5	2	4	4	4	5	5	4	5	5	3	4	3	32225.7	33952.6	36861.8	27615.7	28729.6	35199.5
Q8CIW5	3	3	Twnk	Twinkle mtDNA helicase	13.1814	8.98043	13.5519	13.1976	12.5339	12.4648	12.905	12.0809	11.9754	12.4115	13.3085	13.0195	12.9133	12.9998	12.8193	12.1615	12.068	13.0381	0.429797	0.379116	0	3	1	3	3	2	2	3	2	2	2	3	3	3	3	3	2	2	3	9289.54	505.1	12009.5	9394.49	5930.24	5652.97
O35226	13	9	Psmd4	26S proteasome non-ATPase regulatory subunit 4	16.2987	13.4669	15.8788	15.5311	15.6333	16.7308	17.9639	17.087	17.0586	15.8098	16.07	16.1761	15.9697	16.0571	16.131	17.5725	17.7888	17.9418	0.429724	0.420168	0	9	5	9	8	8	10	11	11	10	8	9	10	9	9	10	11	12	12	80614.3	11322.8	60253.2	47352.1	50828.4	108762
Q6ZQ04	3	3	Frmd4b	FERM domain-containing protein 4B	10.7751	9.80074	8.90476	8.63963	12.3537	9.09835	13.9801	14.1585	14.2317	9.10258	9.60509	12.8476	9.21619	12.6928	9.90272	14.3767	13.9304	14.1323	0.429311	0.699809	0	2	1	1	1	2	1	4	3	3	1	0	2	1	2	1	3	3	3	1752.41	891.9	479.29	398.83	5234	548.12
Q8BG94	3	3	Commd7	COMM domain-containing protein 7	8.73694	9.21164	14.0529	14.1277	14.3033	8.71119	14.9252	14.5731	14.8149	13.3325	9.96358	14.0028	9.33201	15.079	11.6306	13.9143	14.8376	15.2156	0.427896	0.724146	0	1	1	2	2	2	1	3	3	3	2	1	2	1	2	1	2	3	3	426.66	592.9	16995.6	17900.3	20217.2	419.11
Q3THJ3	4	4	Eif1ad	Probable RNA-binding protein EIF1AD	12.8177	14.9946	15.6064	15.0971	15.7396	15.3869	15.6795	15.4831	15.7217	14.9958	15.1885	15.4373	15.4951	15.7512	15.7232	15.8907	16.0211	15.8739	0.4278	0.210418	0	2	3	4	3	4	3	4	4	4	3	4	4	3	4	4	4	4	4	7219.76	32645.7	49888.1	35049.9	54714.1	42846.4
Q9CQN6	5	5	Tmem14c	Transmembrane protein 14C	14.5196	13.1584	14.4546	13.9042	14.7318	15.2798	14.6204	14.6196	14.5106	14.4729	14.9708	14.8095	14.8632	15.1359	15.0339	14.7594	14.7431	14.8602	0.427754	0.0554444	0	7	4	7	5	6	7	6	6	6	6	6	7	6	7	7	6	6	6	23488	9142.9	22452	15331.5	27209.1	39782.1
Q922G0	4	4	Slc25a36	Solute carrier family 25 member 36	13.9815	9.97443	14.0214	14.2765	14.516	14.3424	13.2169	13.775	13.7241	13.9352	14.1667	14.2174	14.1305	14.1929	14.0601	13.8504	13.5912	13.5291	0.427241	0.37834	0	4	2	4	4	4	4	4	4	4	4	4	4	4	4	4	4	4	4	16175.6	1006.01	16628.3	19845.8	23428.1	20772
A0A0A0MQ87	6	3	Sos2	Son of sevenless homolog 1	11.087	11.9968	14.2946	14.2172	13.9875	14.2851	14.8933	14.8164	14.9153	13.4504	13.6331	14.2467	14.1703	13.8444	13.9666	15.2181	14.8636	14.9447	0.427197	0.403323	0	3	3	6	5	5	7	7	7	7	4	4	6	6	5	5	7	7	7	2175.24	4086.98	20096.2	19045.5	16242.6	19963.5
Q9Z2L6	5	5	Minpp1	Multiple inositol polyphosphate phosphatase 1	14.8725	15.0085	14.9129	14.7762	14.5632	14.5447	14.1003	11.8673	12.2842	14.612	15.0409	14.9248	14.8644	14.7866	14.7737	13.8703	13.7517	14.1251	0.424402	0.334567	0	4	4	5	4	4	4	4	2	2	3	4	4	4	4	4	3	3	3	29996.5	32962.4	30848.1	28060.1	24208.8	23899.9
Q61084	4	4	Map3k3	Mitogen-activated protein kinase kinase kinase 3	14.1858	14.1522	13.6102	13.9772	13.8291	11.5292	13.9124	14.3317	13.8439	14.4108	14.2994	13.4956	14.3818	14.4573	13.7021	14.139	13.9951	14.2965	0.422881	0.182461	0	3	3	3	3	3	2	3	4	3	4	4	3	4	4	3	4	3	4	18636.5	18206.8	12504.8	16126.7	14553.6	2955.43
Q9ESW8	3	3	Pgpep1	Pyroglutamyl-peptidase 1	14.8133	14.8179	13.3419	15.1818	14.6948	12.6554	9.64312	12.8341	9.93328	14.7112	15.1473	14.257	14.7411	15.0324	14.6664	10.6037	9.49607	13.0618	0.422397	0.673376	0	3	3	2	3	3	2	1	2	1	3	3	2	3	3	3	1	1	2	28790.4	28882.4	10382.8	37169.8	26519.8	6451.2
Q61288	4	4	Acvrl1	Serine/threonine-protein kinase receptor R3	10.729	9.65684	9.62005	10.0556	8.97386	12.4045	14.5939	14.6403	15.4783	13.3513	10.7352	10.3017	8.77353	13.4446	9.36901	15.2951	14.6772	13.9822	0.419732	0.724474	0	2	1	2	2	0	3	5	5	5	3	2	2	1	3	1	5	5	5	1697.25	807.23	786.91	1064.22		5421.57
Q8C5R8	7	2	Prps1l1	ribose-phosphate diphosphokinase	18.0063	17.4703	18.5481	17.1931	18.0605	18.0788	17.4614	15.8009	16.6674	18.1868	18.3112	18.5134	18.1139	18.4122	18.4958	16.6386	16.9913	17.3961	0.419148	0.268777	0	6	5	7	4	6	6	6	4	5	6	6	7	7	7	7	5	5	5	263299	181589	383308	149845	273369	276869
D3Z4E5	3	3	Dctn6	Dynactin subunit 6	16.2434	15.1907	15.358	13.5621	16.0019	15.7772	9.0806	7.96924	9.25425	15.6047	16.2549	14.8382	15.4698	15.9926	15.6687	9.85639	8.91298	9.60498	0.418424	0.789128	0	3	3	3	2	3	3	1	1	1	3	3	2	3	3	3	1	1	1	77578.3	37398.6	41997.4	12095	65624.2	56155.9
Q922M5	7	6	Cdca7l	Cell division cycle-associated 7-like protein	15.3455	15.8576	14.3444	14.5915	14.8225	15.366	12.6386	12.2236	12.9355	15.9325	15.0867	14.6381	15.84	14.5342	15.4344	13.2121	13.8987	13.3084	0.417781	0.462993	0	6	7	5	5	6	7	4	4	4	7	6	5	8	5	6	4	7	4	41633.6	59378	20800.8	24688	28974.9	42231.1
Q3TG45	10	10	Psmd8	26S proteasome non-ATPase regulatory subunit 8	17.5447	15.7459	17.0096	17.2475	17.5809	17.8096	16.5678	16.6762	16.4426	17.5903	17.5528	17.6638	17.581	17.8854	17.6103	16.867	16.6582	16.9714	0.417263	0.131625	0	9	6	9	10	11	11	7	8	7	10	12	11	12	12	11	7	8	7	191203	54952.9	131950	155604	196053	229738
A0A2R8VKN7	4	4	Mzt2	Mitotic-spindle organizing protein 2	12.884	9.44725	12.6789	12.1046	12.9301	12.8375	10.7403	10.4248	10.9089	12.285	12.5936	14.0818	13.7368	12.7307	12.3597	10.614	11.391	8.91758	0.417097	0.550937	0	3	1	3	2	3	3	2	2	2	2	3	3	3	3	2	2	2	1	7558.88	698.08	6557.45	4404.04	7804.3	7319.13
A0A1D5RMD4	7	6	Kif16b	Kinesin-like protein KIF1C	12.5432	12.859	12.1399	12.1931	13.8865	14.037	14.8753	14.8307	14.7562	13.8498	12.6121	13.6576	13.6879	13.6568	13.7889	15.0155	14.7668	14.8367	0.416792	0.377234	0	3	3	3	3	4	4	6	6	6	5	3	4	4	4	4	7	6	6	5968.57	7429.27	4513.04	4682.69	15144.5	16809.8
Q9JJ48	3	3	Zc3h8	Zinc finger CCCH domain-containing protein 8	12.2276	9.39406	12.6684	8.52583	11.6256	11.5606	13.5231	12.8216	13.4653	12.0065	10.9454	9.66665	12.2749	11.8644	12.42	13.6191	13.6252	13.1279	0.415336	0.572435	0	3	1	3	1	2	2	3	3	3	2	2	1	3	3	3	3	3	3	4795.89	672.81	6509.68	368.58	3159.78	3020.56
A0A0A6YYE3	3	3	Trbv15	T cell receptor beta, variable 15 (Fragment)	13.4065	9.33237	13.1266	14.1273	13.7223	13.6019	13.0445	12.8403	12.8841	13.5802	13.4979	13.717	13.7524	13.7578	13.6368	11.8368	13.0576	12.9862	0.41519	0.429039	0	2	1	2	3	3	2	3	2	3	2	2	3	3	2	3	2	3	3	10858.1	644.65	8943.53	17895.8	13515.5	12433.4
O08914	9	9	Faah	Fatty-acid amide hydrolase 1	14.9883	12.0392	15.3744	14.4196	15.2234	15.2372	14.409	14.3261	14.1093	14.9577	15.3218	15.033	15.0393	15.1587	14.9385	14.3555	14.624	14.4307	0.414764	0.262461	0	6	4	9	5	7	8	6	6	6	7	8	7	8	9	8	6	7	6	32503.1	4208.75	42475.7	21914.5	38254.9	38624.1
Q921X9	7	7	Pdia5	Protein disulfide-isomerase A5	14.8418	14.7637	15.5823	15.6163	14.9751	11.3205	15.5806	15.4717	14.8373	15.5037	15.3297	15.3809	14.8092	15.3029	15.1171	15.3798	14.9718	14.9212	0.414121	0.376928	0	7	6	9	9	8	4	9	9	8	9	8	9	7	8	9	8	8	7	29365	27817.9	49061	50232.9	32208	2557.42
D3Z2E8	3	3	Calhm2	Calcium homeostasis modulator protein 2	12.8652	9.65035	13.2662	13.2282	12.8393	13.0505	12.3297	12.7865	12.4687	13.2008	13.0902	13.2523	13.1262	12.9271	13.1554	12.1593	12.5978	12.6943	0.413193	0.3051	0	2	1	3	3	3	2	3	3	2	3	2	3	2	3	3	2	2	3	7461.36	803.61	9851.67	9595.74	7328.6	8483.83
Q8R570	14	14	Snap47	Synaptosomal-associated protein 47	15.1435	14.6174	15.8906	12.5545	14.89	15.4843	15.89	15.9627	15.7886	14.0026	15.6123	16.0934	15.4258	14.7155	14.9154	16.1707	16.5706	16.4321	0.412972	0.38474	0	7	7	11	5	8	8	11	11	11	6	8	12	9	7	7	10	11	12	36195.9	25135.3	60748.5	6015.77	30362.5	45838.9
Q7TSH2	6	6	Phkb	Phosphorylase b kinase regulatory subunit beta	14.6372	13.2863	13.9452	14.9171	14.4945	14.638	14.2009	14.4346	9.10177	14.1223	14.4739	14.2287	14.4977	14.6227	14.3463	13.5272	13.8915	13.6443	0.410991	0.513448	0	5	3	4	6	5	6	6	6	2	4	5	5	5	5	5	4	5	4	25482.8	9990.1	15773.5	30938.5	23082.5	25497
A0A0R4J2D0	6	6	Usp37	Ubiquitin carboxyl-terminal hydrolase 37	13.9787	13.7858	13.626	13.9179	10.4714	13.2693	12.8732	13.4279	13.3165	14.0014	14.0817	13.5661	14.3131	13.6604	13.3919	12.9133	13.4401	12.9912	0.410274	0.311261	0	5	3	4	4	2	4	4	4	4	5	4	4	6	4	4	4	4	3	16144.4	14123.2	12642.4	15477.3	1419.71	9873.38
Q8K2R5	7	7	Znf668	Zinc finger protein 668	15.2764	15.5835	15.2042	15.2664	15.2848	15.1873	15.1566	14.8876	12.8257	15.6156	15.344	15.2867	15.6173	15.6947	15.4923	15.2493	15.0846	14.98	0.410183	0.170994	0	5	5	5	5	5	5	5	4	3	5	5	5	6	5	5	6	5	4	39688.4	49102.3	37750.4	39413.4	39918.8	37310.5
Q9R0P9	4	4	Uchl1	Ubiquitin carboxyl-terminal hydrolase isozyme L1	8.62176	8.77863	8.30366	9.59675	8.97386	9.4845	13.8376	14.1805	14.0424	9.08562	10.6397	12.8229	9.47488	8.2547	9.38718	13.8728	12.9282	13.0383	0.409391	0.716334	0	0	0	0	1	0	1	4	4	4	0	1	2	0	1	0	4	3	2				774.3		716.34
A2A8E2	4	4	Czib	CXXC motif containing zinc binding protein	11.9154	12.9742	14.3257	13.6856	14.6795	15.0691	14.3673	13.7756	13.859	13.8728	14.7471	13.288	13.8716	15.1126	14.7672	14.1692	14.2635	14.2385	0.408793	0.281498	0	2	2	4	3	4	4	3	3	3	3	4	3	3	4	4	3	3	3	3862.82	8047.06	20533.5	13175.6	26239.5	34374.6
P54818	4	4	Galc	Galactocerebrosidase	8.96602	8.77863	8.11759	8.35652	8.97386	8.05425	14.7338	14.8219	14.4438	9.08562	9.60509	9.19679	9.47488	8.8333	9.38718	14.5531	14.3164	14.471	0.408556	0.765136	0	1	0	1	0	0	1	4	4	4	0	0	0	0	1	0	4	4	3	500.08		277.74			265.81
F8WJI3	6	6	Ccdc58	Protein MIX23	12.7278	11.1214	15.8573	15.2273	15.8448	15.5166	16.5725	16.0409	16.0509	13.7001	14.8936	15.3967	15.1727	14.5706	15.5384	16.3481	16.3703	16.6444	0.408398	0.560207	0	3	2	6	5	6	6	7	6	8	3	4	5	5	4	5	6	7	8	6783.51	2227.73	59364.5	38359.7	58853.2	46876.2
Q9DBU3	9	9	Riok3	Serine/threonine-protein kinase RIO3	11.1645	14.9642	15.1463	15.0506	15.1961	14.9789	16.5976	15.6791	16.0817	14.5365	14.5066	14.9993	15.134	15.3956	15.0968	16.3465	15.9047	16.6057	0.407415	0.485373	0	3	5	6	5	6	5	8	6	7	4	4	6	6	7	6	8	6	8	2295.34	31964.3	36266.1	33937.8	37538.3	32292.3
B1ATB3	3	3	Tmc6	Transmembrane channel-like protein 6	13.2881	8.51716	13.3914	13.2459	13.3413	13.3607	13.1342	13.6103	13.7437	13.3142	13.4968	13.0272	13.169	13.2129	13.297	13.3377	13.2203	13.2132	0.406168	0.468183	0	2	1	3	2	2	2	3	3	3	2	2	3	2	2	2	2	3	3	10002.7	366.37	10745.1	9714.23	10378.3	10518.9
Q9DB34	15	15	Chmp2a	Charged multivesicular body protein 2a	16.4467	14.7637	17.5746	17.2075	16.9326	16.8009	18.0743	17.0818	17.5037	16.7567	16.7309	16.7207	16.6103	17.2093	17.5434	17.6821	18.3343	18.4498	0.405759	0.317203	0	7	5	13	10	9	7	11	8	11	8	9	9	7	10	12	9	11	11	89319.7	27817.9	195204	151342	125092	114172
Q9DBS9	14	14	Osbpl3	Oxysterol-binding protein-related protein 3	12.1082	14.1075	14.5781	13.608	15.053	15.1069	16.3654	16.2932	17.0362	14.8615	14.3676	14.7869	14.8866	15.3663	14.8044	16.9924	16.1552	15.6756	0.404459	0.497061	0	5	7	8	7	10	10	12	14	14	9	7	9	9	10	9	14	12	11	4415.13	17650.9	24459.6	12485.5	33994.4	35287
O88935	3	3	Syn1	Synapsin-1	8.62176	8.77863	8.30366	8.35652	8.97386	8.52403	12.5648	12.909	12.5212	9.08562	9.60509	9.19679	9.47488	9.52537	9.38718	12.6266	12.6572	11.6341	0.404367	0.639311	0	0	0	0	0	0	1	3	3	3	0	0	0	0	0	0	3	3	3						368.12
P62855	5	5	Rps26	40S ribosomal protein S26	17.432	17.3252	18.5216	18.5706	18.6485	18.0236	17.4205	17.7502	17.4074	18.4519	19.3999	19.0796	17.8794	18.3799	19.301	14.6847	18.821	18.7332	0.403455	0.443838	0	3	3	5	4	5	3	5	5	5	3	4	4	3	4	4	4	5	5	176833	164208	376309	389327	410909	266468
Q9D1H8	5	5	Mrpl53	39S ribosomal protein L53, mitochondrial	15.1969	14.1337	14.8084	14.6195	15.4243	15.0969	13.5595	12.8914	13.4156	15.323	15.0318	15.222	15.2335	15.4224	15.5258	14.156	13.6005	13.2578	0.402927	0.342296	0	5	3	5	4	6	6	3	3	3	6	5	6	6	5	6	3	3	3	37559.5	17975.4	28693.3	25171.8	43972.2	35045.2
Q9CXW2	13	13	Mrps22	28S ribosomal protein S22, mitochondrial	15.2548	16.8427	17.0231	16.2419	16.5653	14.6961	17.8728	17.6614	17.604	16.8077	16.8776	16.8443	16.8295	16.5393	16.8037	17.3975	17.6646	17.6132	0.401704	0.316318	0	6	9	10	8	9	6	14	14	14	9	11	11	10	8	11	12	14	14	39097.3	117530	133191	77500.8	96971.9	26544
Q91VK4	4	4	Itm2c	Integral membrane protein 2C	11.5619	13.6797	14.0229	14.1246	11.2668	14.2634	15.405	15.5765	15.1627	13.6168	13.8248	13.3897	14.2241	13.5969	13.5932	15.5452	15.6146	15.2699	0.401299	0.514231	0	2	3	4	4	2	4	4	4	4	3	3	3	4	3	4	4	4	4	3023.26	13121.9	16646.3	17862.5	2463.96	19665.2
Q8R1Z9	4	4	Rnf121	E3 ubiquitin ligase Rnf121	15.1858	15.0914	15.1475	15.0367	13.5191	15.3643	15.0864	15.0865	15.008	15.3253	15.4699	15.3918	15.3447	15.6624	15.4511	15.3062	15.1351	15.0315	0.399137	0.0541376	0	3	3	4	3	2	4	3	3	3	4	4	4	4	4	4	3	3	3	37272.4	34911	36296.2	33613.3	11739.9	42181
O35405	8	8	Pld3	5'-3' exonuclease PLD3	14.5937	14.2683	16.0753	14.5255	14.6134	16.1421	19.1281	18.2699	18.1492	15.9718	15.3359	15.2345	16.2238	15.1688	15.2897	19.1188	18.6815	18.3283	0.398631	0.637986	0	4	4	7	4	4	6	7	8	8	6	5	5	7	5	5	9	7	6	24725.4	19733.1	69046.2	23583.1	25064.4	72320.5
P23611	5	5	Irf8	Interferon regulatory factor 8	8.62176	9.30656	8.21374	8.00405	11.4341	13.9979	15.085	10.7545	15.7753	8.8369	9.30729	11.9833	12.1543	9.69143	9.56394	16.2227	14.8786	12.1387	0.398245	0.768131	0	0	1	1	1	2	3	5	2	4	1	1	2	2	1	1	5	4	2		633.22	296.88	256.72	2767.02	16360.7
Q7TT28	6	6	Rexo1	RNA exonuclease 1 homolog	14.6312	13.6397	14.2933	14.4058	10.9622	14.9589	14.9876	15.2099	14.5584	14.5001	14.7184	14.4188	14.5767	13.4789	14.4189	15.321	15.2385	14.5576	0.397985	0.40589	0	5	3	4	4	2	5	6	6	5	4	4	4	4	3	4	6	6	5	25376.2	12763.4	20077	21706.3	1995.06	31848.7
Q9DC07	7	6	Nebl	LIM zinc-binding domain-containing Nebulette	16.7289	15.9775	14.8835	15.3346	16.615	16.5734	11.2974	10.4034	12.9105	16.0866	16.9326	15.8203	16.6278	16.768	16.5939	10.6887	12.3962	12.3916	0.397958	0.729879	0	8	6	5	5	8	8	3	3	4	6	8	6	7	8	8	2	4	4	108614	64519.8	30225.1	41320.5	100374	97516.6
Q9DCD5	5	5	Tjap1	Tight junction-associated protein 1	14.2924	14.5254	13.8921	11.5679	14.0288	13.7074	13.4284	14.2919	14.2974	14.6961	14.3206	14.4658	13.8578	13.9266	14.5131	14.0915	13.7647	13.9747	0.39769	0.230057	0	4	3	3	2	3	3	3	4	4	4	4	4	3	3	5	4	3	4	20064.8	23581.3	15202.9	3035.97	16714.2	13376.7
Q3U0B3	5	5	Dhrs11	Dehydrogenase/reductase SDR family member 11	13.7386	10.8645	14.1751	14.1988	14.0997	14.3353	15.157	14.9554	15.1014	13.9495	14.1069	14.1108	14.3644	14.5589	14.3984	15.1496	14.8884	14.6747	0.397303	0.393014	0	3	2	4	4	3	4	5	5	5	3	3	4	4	5	4	5	5	5	13668.9	1864.4	18497.9	18804.5	17556.6	20670.8
A0A494B9R1	3	3	Ppp1r14b	Protein phosphatase 1 regulatory subunit 14B	10.8585	12.7845	12.154	13.2351	11.6367	10.9788	9.58727	12.3962	9.88571	10.9692	11.3281	10.9984	11.2451	13.9829	11.3235	14.6629	12.8901	9.68208	0.396148	0.56947	0	1	2	2	2	1	1	1	3	1	1	1	1	1	2	1	2	3	0	1856.67	7055.38	4557.42	9641.97	3184.27	2018.07
A0A2I3BPS6	6	6	Otulinl	Inactive ubiquitin thioesterase OTULINL	14.7208	10.7885	14.6725	15.2389	15.1104	14.739	15.0954	15.2903	14.8333	14.6326	14.5302	15.0431	14.6191	15.3501	14.8749	14.9183	15.0071	15.079	0.396117	0.419785	0	4	2	4	5	5	5	6	6	5	4	4	4	4	5	5	5	5	5	27002.8	1768.79	26112.8	38668.3	35374.5	27345.5
A0A5F8MPF0	6	4	Kif1b	Kinesin-like protein KIF1C	13.8632	10.8097	14.6608	12.5714	14.0709	14.033	15.55	15.3197	15.3383	14.3473	11.34	14.3829	14.352	14.4899	14.2576	15.6748	15.5363	15.4007	0.39604	0.560304	0	4	2	5	3	4	4	7	7	7	5	2	4	5	4	5	7	7	7	14901.3	1794.89	25902.9	6086.63	17209.2	16763.4
Q64522	10	2	H2ac21	Histone H2A type 2-B	20.9906	19.8662	21.46	21.588	21.5736	21.952	16.0217	14.8095	16.1656	21.938	21.8493	20.44	21.1227	22.0984	21.1233	16.5182	15.4904	17.4086	0.395744	0.762166	0	10	10	11	11	11	12	6	6	6	11	11	10	11	12	10	6	6	7	2.08351e+06	955707	2.88473e+06	3.15241e+06	3121014	4.05709e+06
D3Z767	4	4	Ttc33	Tetratricopeptide repeat protein 33	13.7438	13.8837	13.0717	13.416	13.1385	13.9238	11.2722	11.613	12.0938	13.2917	13.7322	13.1937	13.6035	13.4292	13.2647	13.2256	13.0765	12.8932	0.394863	0.269109	0	3	3	3	3	3	3	2	2	3	3	3	3	3	3	3	4	4	4	13718	15114.6	8609.43	10930.3	9017.65	15540.9
P53996	8	8	Cnbp	CCHC-type zinc finger nucleic acid binding protein	17.5794	17.7653	17.4428	17.4659	17.4339	16.8763	14.6014	14.5855	13.0563	17.5706	18.1238	17.2522	17.6077	17.2378	17.544	14.5718	15.3709	15.0654	0.393063	0.597334	0	7	6	7	8	7	7	4	4	3	6	8	7	7	7	7	4	5	5	195850	222781	178159	181031	177063	120304
Q8C9V1	11	11	Tbc1d10c	Carabin	15.8345	14.6791	16.2667	14.9006	16.0079	16.8349	18.9291	17.9932	18.3786	16.4436	15.6223	16.1165	16.5797	15.9732	16.7545	18.4305	18.4839	18.9535	0.392538	0.555011	0	7	5	7	5	8	10	11	10	11	7	6	8	9	8	10	10	11	11	58433.2	26233.6	78843	30587.4	65895	116901
E9PWV7	3	3	Gtpbp3	tRNA modification GTPase GTPBP3, mitochondrial	9.21866	9.27242	13.2968	13.4557	13.7957	13.4047	14.3212	13.839	14.1073	9.70727	10.3494	14.0127	14.1055	13.9195	14.0719	14.3988	13.6462	14.03	0.392196	0.667309	0	1	1	2	2	2	2	3	3	3	1	1	2	2	2	2	3	3	3	595.79	618.41	10063.5	11235.1	14220.8	10844.7
D3YZ09	4	4	Gar1	H/ACA ribonucleoprotein complex subunit 1	17.2767	17.2479	18.4896	17.4896	18.0007	17.5228	19.7205	18.5756	18.4611	17.7973	17.6218	18.1401	17.8091	17.7355	18.1748	19.1121	19.5214	20.3828	0.390048	0.368168	0	3	3	3	3	3	3	4	4	4	3	3	3	3	3	3	4	4	4	158783	155642	368065	184031	262269	188316
Q5XJY4	6	6	Parl	Presenilins-associated rhomboid-like protein, mitochondrial	13.3547	14.6712	15.1784	14.6077	15.3491	15.1122	13.2613	14.5432	14.3507	15.011	15.3556	15.0424	15.2719	15.229	15.5132	14.677	14.1165	13.7197	0.389756	0.2412	0	3	4	6	4	6	6	3	5	5	5	5	5	6	6	6	5	5	3	10475.3	26089.3	37081.7	24965.9	41739.4	35416.9
A0A5K1VVQ9	11	11	Ttn	Titin	15.1657	15.5789	15.8103	15.3737	16.7815	17.5091	10.9067	12.3734	13.2752	15.0632	16.8483	15.0008	16.1297	16.5768	16.4864	12.6951	14.133	13.3431	0.389126	0.661343	0	4	6	6	5	6	7	3	4	5	4	5	5	6	6	6	4	4	4	36756.6	48945.8	57460.8	42458	112648	186538
Q64321	5	5	Zbtb7b	Zinc finger and BTB domain-containing protein 7B	14.7414	15.3378	14.5072	14.9834	15.0543	14.6893	7.12133	5.48896	8.60563	14.842	14.8265	14.6873	14.8532	14.7976	14.4603	7.90376	8.39498	9.25219	0.387635	0.82165	0	6	4	6	4	5	5	1	1	2	6	5	6	5	5	6	1	2	2	27391.5	41412.8	23285.9	32392.3	34024.4	26419.5
P61021	6	2	Rab5b	Ras-related protein Rab-5B	15.8251	15.9358	16.1546	15.7784	15.7381	15.927	17.8083	17.2035	17.05	15.9766	15.59	15.9393	15.8984	15.8385	15.8294	17.85	18.7251	19.2528	0.386607	0.485205	0	4	4	5	4	5	5	7	7	6	4	4	5	5	5	5	7	8	8	58053.5	62682.9	72950.9	56204.7	54654.9	62304
A0A0G2JFH9	4	4	Ap5z1	AP-5 complex subunit zeta-1	8.96258	12.5476	12.1797	10.7598	12.6409	13.1924	13.082	13.2373	13.4505	12.8321	12.9141	11.0279	12.0567	12.8339	12.428	13.4783	12.8148	13.1273	0.384458	0.49047	0	1	3	4	2	4	4	4	4	4	4	3	2	3	4	3	4	4	4	498.89	5987.03	4639.48	1733.91	6387	9361.01
E9PY43	4	4	Erich1	Glutamate rich 1	8.62176	8.77863	8.58225	8.35652	9.05553	10.4936	14.4248	13.9318	14.2313	8.69895	9.60509	8.77729	8.84862	11.1584	9.25633	14.6013	14.5886	14.3837	0.382458	0.76568	0	0	0	1	0	1	2	4	4	4	1	0	1	1	2	1	4	4	4			383.28		532.09	1441.7
O54788	3	3	Dffb	DNA fragmentation factor subunit beta	13.7693	10.8212	13.522	14.0193	14.2792	13.7833	13.2976	13.8592	13.4161	14.1602	13.8302	13.7324	14.1551	13.9661	14.0847	13.4358	13.3297	13.5124	0.382143	0.299123	0	2	1	2	2	3	2	3	3	3	2	3	3	3	3	3	3	3	3	13962.5	1809.28	11763.4	16604.3	19882.7	14099
Q9CR80	5	5	Fam32a	Protein FAM32A	16.1477	15.5669	16.4252	15.7399	15.7339	16.9083	15.4224	13.4911	14.0721	15.896	16.5445	15.5835	16.5563	15.2909	16.2299	15.5748	15.6386	15.6208	0.38087	0.347138	0	4	3	5	3	4	5	3	2	2	3	4	3	4	3	4	3	3	3	72601.9	48539.3	88001.5	54723.1	54497	123002
Q5U5M8	3	3	Bloc1s3	Biogenesis of lysosome-related organelles complex 1 subunit 3	14.8369	14.4361	14.6322	11.3894	14.8426	14.3364	15.0412	15.0328	15.2539	14.9341	14.2341	14.9362	14.6149	14.1221	14.7111	15.2666	15.2096	15.1909	0.379777	0.374503	0	4	3	4	2	4	3	4	4	4	4	3	4	4	3	4	4	4	4	29265.1	22166.1	25394.1	2682.64	29380.8	20686.3
P35980	12	12	Rpl18	60S ribosomal protein L18	20.0778	19.1012	19.9764	19.9141	20.1821	20.1748	18.9249	17.7107	19.111	20.0337	20.3889	20.1613	20.0071	20.4632	20.3564	19.1829	19.1405	18.8509	0.379079	0.286446	0	13	11	14	14	13	13	10	9	11	13	13	13	13	14	14	10	11	10	1.1067e+06	562372	1.03155e+06	987992	1.18965e+06	1.18367e+06
Q9CQ26	6	6	Stambp	STAM-binding protein	15.7372	12.8287	15.628	15.8334	15.709	15.901	15.5606	15.614	15.5361	15.9125	15.8989	15.7368	15.8326	15.9161	15.6846	15.4696	15.5297	15.7742	0.378581	0.261295	0	6	3	6	6	6	5	5	6	6	6	6	6	6	6	6	6	6	6	54622.9	7274.71	50641.7	58387.1	53563.5	61190
P97434	9	8	Mprip	Myosin phosphatase Rho-interacting protein	15.0349	11.1094	14.6413	14.8974	13.2863	14.8574	15.031	14.5238	14.5297	14.9344	14.4057	14.9318	14.3409	14.5312	14.4184	14.519	14.5048	14.7261	0.377904	0.39563	0	6	3	6	6	4	6	8	7	7	7	5	8	5	6	5	7	7	8	33570.5	2209.41	25555.2	30519.3	9989.88	29683.5
P09450	12	12	Junb	Transcription factor JunB	16.7523	16.0561	17.5476	17.1428	17.0191	16.6921	17.3491	16.7923	17.7593	17.4898	16.7671	17.5858	17.2361	16.7584	17.1545	17.9337	17.9625	17.6124	0.376584	0.115903	0	9	7	11	10	11	9	11	8	10	11	9	11	11	9	11	11	11	10	110397	68136.8	191583	144706	132821	105884
A0A0J9YTU3	9	9	Specc1	Cytospin-B	11.0599	10.8404	7.31424	10.4943	8.97386	9.86361	15.2548	15.0288	15.2129	10.5274	10.2667	10.5256	11.2126	10.5253	10.1725	14.6928	14.9017	14.5984	0.375583	0.759129	0	3	2	1	2	0	2	10	9	10	2	2	2	3	2	2	10	10	8	2134.84	1833.51	159.15	1442.43		931.63
Q3U132	4	4	Tespa1	Protein TESPA1	7.61589	10.7856	10.1251	7.83851	10.9142	10.3369	14.5383	13.394	13.4021	8.23946	8.60129	8.21096	11.7193	11.5521	8.50637	14.8698	15.1797	15.4365	0.373874	0.780943	0	1	2	2	1	2	2	4	3	3	1	1	1	2	2	1	4	4	4	196.16	1765.17	1116.76	228.89	1929.75	1293.33
P62301	13	13	Rps13	40S ribosomal protein S13	19.788	19.3364	19.6603	19.6976	19.9291	19.971	16.715	17.0158	17.4944	19.7163	20.0337	19.8203	19.9476	20.1685	20.1254	17.5651	17.7141	17.8808	0.37381	0.534719	0	16	15	16	16	16	16	9	10	11	16	16	16	16	16	16	11	9	14	905252	661967	828587	850308	998288	1.02767e+06
Q60837	8	8	Il12rb1	Interleukin-12 receptor subunit beta-1	13.3496	12.2964	14.9561	12.0784	15.1173	13.031	17.0777	16.9491	17.0248	13.5555	12.7141	13.6666	14.0627	14.2227	14.2039	17.7615	17.5113	17.544	0.373544	0.69984	0	4	3	6	3	6	4	8	8	8	4	3	4	5	5	5	8	8	8	10438	5030.32	31785.8	4324.74	35543.5	8370.18
Q9CR00	9	9	Psmd9	26S proteasome non-ATPase regulatory subunit 9	14.7949	15.2416	15.1976	14.3668	15.2496	14.2613	17.338	16.9285	17.1382	15.5399	15.1624	15.5382	15.0165	14.9416	14.9103	17.3959	17.5357	17.8369	0.373434	0.523534	0	5	5	5	5	6	5	9	9	9	6	5	7	5	5	5	9	9	10	28426	38743	37578.1	21127.6	38955.9	19637.1
Q8K2H2	8	8	Otud6b	Deubiquitinase OTUD6B	16.1794	16.1079	15.9996	16.1489	16.0082	15.7534	11.0543	14.9289	15.0814	15.6535	15.719	15.6721	16.1619	16.3301	15.9303	15.054	15.1094	14.9868	0.372803	0.522643	0	9	8	9	9	8	7	3	6	6	6	6	7	9	9	8	6	6	6	74213.6	70624.6	65517.4	72662.5	65907.4	55238.2
P97492	11	11	Rgs14	Regulator of G-protein signaling 14	12.2388	13.6516	14.9724	14.0208	13.2383	15.2841	16.1777	16.4534	16.0604	14.8947	13.7207	14.5812	14.7439	13.6902	14.8969	16.3772	16.4389	16.0962	0.371383	0.545539	0	3	4	6	5	4	8	10	11	9	6	5	6	6	5	8	11	11	10	4833.31	12868.5	32146.7	16622.1	9663.21	39900.6
P61219	4	4	Polr2f	DNA-directed RNA polymerases I, II, and III subunit RPABC2	13.7514	13.759	12.376	13.9022	14.0268	14.0099	14.475	13.4601	13.8982	12.6859	14.0882	13.7305	13.9002	14.0449	14.0911	14.521	14.7043	15.2113	0.368728	0.242361	0	2	2	2	3	3	3	3	2	2	2	3	2	2	3	3	3	3	3	13790.7	13863.4	5315.69	15310.1	16691.7	16496.7
P61620	17	17	Sec61a1	Protein transport protein Sec61 subunit alpha isoform 1	18.8712	17.8158	18.7688	18.5309	18.7438	18.611	18.5035	17.5633	18.3226	18.2116	18.9785	19.1333	18.8437	18.9999	19.2457	18.6299	18.492	18.5143	0.368654	0.0666554	0	15	12	16	14	15	14	13	10	13	11	16	17	15	16	16	13	13	13	479514	230729	446659	378745	438993	400367
Q3U1N2	6	6	Srebf2	Sterol regulatory element-binding protein 2	15.0954	14.9926	14.5358	12.8665	11.013	15.3249	15.47	15.2246	15.4518	15.1242	14.9422	14.4718	14.9182	13.0533	14.5551	15.5481	15.3836	15.2958	0.368622	0.523093	0	5	4	5	3	2	5	7	6	7	4	4	5	4	3	5	7	7	7	35009.1	32600.9	23751.8	7468.04	2066.51	41045
F8WHN7	6	3	Runx2	Runt-related transcription factor 3	11.849	13.2051	10.589	12.7006	13.5963	14.6542	15.1679	16.0178	16.28	13.6519	13.8257	13.4397	14.8483	13.429	11.9123	16.7281	15.4325	14.0983	0.367326	0.646833	0	2	3	2	3	3	4	4	5	5	3	3	3	5	3	2	5	4	3	3688.93	9443.42	1540.31	6656.89	12384.7	25783.5
P35278	10	6	Rab5c	Ras-related protein Rab-5C	17.0601	15.2763	17.5267	16.9774	17.2112	16.7707	18.7899	18.2214	18.2968	17.5159	16.4049	17.2083	17.0713	17.2231	17.0726	18.7372	19.0324	19.1683	0.367078	0.455874	0	7	5	9	7	9	7	11	11	10	8	6	8	8	9	8	11	12	12	136643	39684	188827	129035	151732	111810
Q8C142	9	9	Ldlrap1	Low density lipoprotein receptor adapter protein 1	15.6524	15.665	15.7846	15.9655	15.3982	15.7243	12.7152	14.6566	14.372	16.0729	15.9108	15.8645	15.8878	15.6028	15.7392	14.4717	14.9201	14.766	0.366894	0.372385	0	8	6	8	8	7	8	4	5	5	8	8	8	8	7	8	5	7	5	51503.1	51955.7	56448.5	63988.1	43185	54135.7
Q9D920	6	6	Borcs5	BLOC-1-related complex subunit 5	14.4508	11.177	15.1983	14.9362	15.0719	15.2945	15.403	15.2761	15.3893	14.6968	14.7641	15.0788	14.686	15.076	15.0219	15.3537	15.4135	15.3944	0.365364	0.438928	0	5	2	6	5	5	6	5	5	5	5	5	6	5	5	6	4	5	5	22393.7	2315.39	37595.2	31351	34443.5	40188.8
G3X959	7	7	Pphln1	Periphilin-1	15.7815	15.9202	16.3922	15.9745	15.7971	12.8115	15.9081	15.6451	15.9047	16.181	15.6223	16.1198	15.8157	15.6032	16.1136	15.9717	16.0323	15.9586	0.364805	0.324175	0	5	5	7	6	5	3	6	6	6	6	5	7	4	5	6	5	6	7	56324.9	62008.9	86011.3	64388.6	56936	7188.74
Q9CQL6	4	4	Mrpl35	39S ribosomal protein L35, mitochondrial	15.2888	15.5577	15.1614	15.4186	14.7208	15.4157	12.8317	12.7465	13.6758	14.8253	16.0851	14.807	14.9705	15.9823	14.9811	13.7675	14.4094	14.2618	0.363659	0.436787	0	4	4	4	4	3	4	2	2	2	3	4	3	3	4	3	2	2	2	40030.9	48232.9	36648	43797.9	27002	43710.6
Q9QXK9	6	6	Sh2d2a	SH2 domain-containing protein 2A	13.2436	10.7376	14.4945	14.443	14.2566	14.3822	15.802	15.233	15.8225	13.5245	14.3323	14.6243	13.6835	14.3164	14.208	15.3414	15.8735	15.7764	0.362819	0.547989	0	3	2	5	4	4	4	6	5	6	3	4	5	3	4	4	5	6	6	9698.87	1707.4	23082.8	22272.4	19572.9	21353.9
P62342	5	5	Selenot	Thioredoxin reductase-like selenoprotein T	13.9945	14.1243	14.5713	13.5197	14.6312	14.8488	16.6081	15.9401	16.6001	14.1387	14.2967	14.4837	14.3006	14.1938	13.924	17.4903	17.4891	17.7847	0.362598	0.600818	0	3	3	4	3	4	4	6	6	6	3	3	4	3	3	3	6	6	6	16321.9	17858.6	24343.7	11744.6	25377.2	29508.1
A0A3Q4EH04	9	8	Srsf7	Serine/arginine-rich splicing factor 7	20.1633	19.4491	20.1653	19.9699	20.5757	20.5132	19.8818	18.1453	19.9512	20.1384	20.4327	20.1451	20.1846	20.6099	20.5698	19.7059	19.9737	20.3179	0.362576	0.184456	0	9	7	10	8	8	9	6	6	7	9	8	9	8	9	10	8	7	8	1174203	715776	1.17585e+06	1.02695e+06	1.56281e+06	1496507
Q9CQM2	3	2	Kdelr2	ER lumen protein-retaining receptor 2	15.7708	14.059	15.853	15.5745	12.9373	15.5233	14.3856	14.601	14.7224	14.9848	15.1191	15.9277	14.772	15.3897	16.0364	15.1437	14.5116	14.8019	0.362232	0.334484	0	5	3	5	4	2	5	4	5	4	4	4	5	3	3	5	4	4	4	55910.3	17068.5	59186.5	48795.8	7843.43	47095.1
Q3TQC3	3	3	Zscan22	Zinc finger and SCAN domain containing 22	11.6701	11.6046	11.5668	8.88053	11.1535	11.6966	11.0697	10.9488	11.0769	11.3348	11.3835	11.5836	11.2636	11.6467	11.9698	10.9154	11.3712	11.4569	0.362007	0.255037	0	2	2	3	1	2	2	3	2	3	2	2	2	2	2	3	2	3	3	3258.71	3114.15	3033.61	471.31	2277.85	3319.13
A0A494BB95	8	1	Eif1a	Eukaryotic translation initiation factor 1A, X-chromosomal	18.5662	18.0362	18.6418	18.1333	18.6613	19.2621	17.9858	17.5235	17.28	19.2162	18.9036	18.8067	18.8396	18.7423	18.8561	18.0871	18.1127	17.7759	0.361118	0.184401	0	10	8	10	7	9	11	8	7	7	11	10	10	11	10	10	8	8	8	388124	268813	409027	287525	414579	628743
Q8BFS6	7	7	Cpped1	Serine/threonine-protein phosphatase CPPED1	15.7799	15.6785	15.3193	15.3468	15.1314	15.3505	14.6272	14.4547	14.3121	15.5509	16.0552	15.389	15.4931	15.5767	15.7948	15.1254	14.9803	15.2797	0.360529	0.101351	0	4	4	5	5	5	5	4	5	4	5	5	5	5	5	6	6	6	6	56261.7	52442.8	40885.4	41672.4	35893.2	41779.2
Q8BGB7	5	5	Enoph1	Enolase-phosphatase E1	13.3106	10.7097	13.318	14.9834	11.273	10.8153	15.6998	15.2513	15.5216	12.6069	10.9071	12.9391	14.374	13.3297	13.0914	15.2977	15.7123	15.8512	0.358507	0.689405	0	3	2	3	5	2	2	5	5	5	3	2	3	4	3	3	4	5	5	10159.9	1674.71	10212.1	32393	2474.69	1801.85
Q9DBB8	4	2	Dhdh	Trans-1,2-dihydrobenzene-1,2-diol dehydrogenase	14.5409	14.4532	13.8565	14.235	14.2294	14.08	10.7998	10.4252	8.04084	14.6073	14.395	14.603	14.0585	14.19	14.7381	8.32921	12.2366	10.726	0.358095	0.746024	0	4	3	3	3	4	3	2	2	1	4	3	4	3	3	4	1	3	2	23837.1	22431.4	14832.7	19282.2	19208.2	17318.6
A0A0R4J0T0	5	5	Hscb	Iron-sulfur cluster co-chaperone protein HscB	14.5332	14.6811	15.4943	15.1274	15.0283	14.3336	14.9535	14.185	12.8121	15.1982	15.2373	15.1188	14.969	16.1984	15.4744	14.6467	14.3842	13.1386	0.357473	0.363726	0	3	3	5	4	4	3	4	3	2	4	4	4	4	6	5	3	3	2	23709.6	26270.3	46157	35792.3	33417.6	20646.6
Q9CQ28	3	3	Dph6	Diphthine--ammonia ligase	13.7807	14.3609	13.9573	10.8545	14.1056	13.4365	14.1518	14.5511	14.4928	14.3214	13.9704	14.1173	14.089	14.0802	14.2418	14.0762	13.99	14.0221	0.357452	0.362851	0	3	4	4	2	3	3	4	4	4	4	3	4	4	4	4	4	4	4	14073.9	21041.1	15905.8	1851.59	17628.2	11086.7
Q8VCN5	6	6	Cth	Cystathionine gamma-lyase	15.5581	15.3993	15.3783	15.8431	15.6243	14.9837	13.6826	13.8618	10.6334	14.9617	15.9255	15.8815	15.4223	15.8074	15.698	13.8242	12.7306	13.929	0.357288	0.602512	0	5	4	5	5	5	5	4	4	2	4	5	5	5	5	5	4	3	5	48244.3	43216	42593	58782.9	50510.4	32400.8
Q3UHC2	9	9	Lrrk1	Leucine-rich repeat serine/threonine-protein kinase 1	8.75606	10.2368	13.8532	9.56356	11.9003	11.7411	15.4716	15.4675	15.3819	9.55184	11.4489	11.1936	11.8913	14.7251	12.2194	15.8573	14.7891	13.9049	0.356604	0.754937	0	1	2	6	2	3	4	8	8	9	2	3	3	3	6	3	10	9	6	432.35	1206.66	14799.2	756.69	3822.53	3423.04
Q8BMS4	5	5	Coq3	Ubiquinone biosynthesis O-methyltransferase, mitochondrial	13.4486	14.718	14.9532	15.2457	15.191	10.717	14.7328	14.8858	14.6257	13.5832	15.0498	14.5306	14.4684	15.1849	15.2646	14.6839	14.4833	14.478	0.356539	0.492519	0	3	4	5	6	6	2	5	5	4	3	5	4	4	6	6	5	5	5	11179.9	26949.2	31722.2	38851.5	37405.9	1683.2
A0A5F8MQ23	8	4	Rxra	Retinoic acid receptor RXR-alpha	15.6541	15.5319	14.8968	15.2381	15.0069	14.8319	9.70629	7.25635	11.4357	15.3797	15.4513	15.1981	14.9918	15.2169	15.1585	10.1051	8.61357	12.643	0.355543	0.794011	0	10	8	10	9	9	9	4	3	5	10	9	10	10	10	9	4	3	6	51565.5	47377.3	30506	38647.6	32925	29164.5
P58334	3	3	Klf16	Krueppel-like factor 16	13.3367	9.49833	13.9723	13.651	13.1677	13.127	12.5623	12.3347	12.8327	13.8446	12.3867	13.6404	13.2351	13.0591	12.3999	13.047	13.1972	12.8435	0.352292	0.46132	0	3	1	3	3	3	3	2	2	2	3	2	3	3	3	2	3	3	2	10345.6	723.24	16072.7	12863.7	9201.97	8945.56
Q791T5	6	6	Mtch1	Mitochondrial carrier homolog 1	15.5633	11.6228	15.7069	15.2052	15.5806	15.8659	15.8325	15.6653	16.0753	15.4535	15.5358	15.5476	14.9906	14.9891	15.8317	15.9488	16.0209	15.9646	0.351667	0.471912	0	6	3	6	5	6	6	7	7	7	6	6	6	5	5	6	6	7	7	48417.9	3153.55	53486	37777.2	49003.2	59720.6
Q01147	4	2	Creb1	Cyclic AMP-responsive element-binding protein 1	14.7543	14.4643	15.3767	15.1514	15.1129	15.1458	16.633	16.0315	16.2397	15.396	14.7911	15.4731	15.6603	15.1395	15.139	16.582	16.6516	17.2411	0.351582	0.352573	0	3	3	3	3	4	4	4	3	4	3	3	4	4	4	3	4	4	4	27635.9	22604.2	42543.8	36393.6	35435.4	36252.3
Q64674	12	12	Srm	Spermidine synthase	15.1832	14.3285	17.4058	15.6389	16.9969	16.9441	18.0405	17.5551	17.7699	16.2537	16.1575	17.08	16.5609	16.6418	16.8982	17.9059	17.8892	17.6345	0.350996	0.480084	0	7	6	13	8	13	12	13	14	13	10	9	12	10	11	12	13	13	11	37204.9	20573	173646	51026.1	130789	126088
O09010	4	4	Lfng	Beta-1,3-N-acetylglucosaminyltransferase lunatic fringe	10.0243	10.0869	8.30366	9.6091	10.0079	12.6333	13.3977	13.8408	14.9363	12.1434	10.1879	9.73395	12.221	10.2836	9.38718	14.4553	14.0798	13.506	0.35091	0.731578	0	1	1	0	1	1	2	2	4	3	2	1	1	2	1	0	2	2	2	1041.41	1087.54		780.96	1029.64	6353.37
P55772	8	8	Entpd1	Ectonucleoside triphosphate diphosphohydrolase 1	13.5914	12.9949	14.9647	13.1849	14.9498	13.4812	17.6173	17.0133	17.4082	13.6552	13.6517	15.1656	14.5794	14.7759	13.7159	17.4079	17.5566	17.8557	0.350909	0.688155	0	4	3	6	4	6	4	9	8	9	4	4	7	5	6	4	9	9	9	12343	8162.9	31975.3	9312.02	31648.5	11435.6
Q9D842	4	4	Aplf	Aprataxin and PNK-like factor	13.07	14.3613	14.4224	14.2522	13.1913	12.8409	15.1447	15.0333	15.0456	14.4305	13.369	14.2939	14.2704	14.2833	14.3326	15.1771	15.0166	15.3338	0.349501	0.347177	0	2	3	3	3	2	2	3	4	4	3	2	3	3	3	3	4	3	4	8599.29	21046.3	21956.7	19514.2	9353.41	7336.58
Q9D853	6	6	Eef1akmt2	EEF1A lysine methyltransferase 2	14.2523	11.5103	13.8947	12.8189	14.0692	14.0237	14.8751	14.8807	13.6867	13.9881	14.056	14.4256	14.0981	12.4556	13.994	14.6247	14.8191	14.6739	0.347084	0.422954	0	4	2	4	3	4	4	5	6	4	4	4	5	5	3	4	6	7	6	19514.8	2917.03	15230.8	7225.66	17189	16654.8
Q6ZWZ2	4	3	Ube2r2	Ubiquitin-conjugating enzyme E2 R2	12.6042	12.7718	14.3616	12.3505	13.8436	13.8427	15.7008	15.2982	15.2853	14.2452	13.0562	13.9437	13.8717	12.5739	13.7657	15.7306	15.6737	16.3188	0.34676	0.569698	0	2	2	3	2	3	3	4	4	4	3	2	3	3	2	3	3	4	4	6226.46	6993.29	21051.5	5222.43	14701.2	14691.3
Q3UDF0	3	3	Slc2a6	Solute carrier family 2, facilitated glucose transporter member 6	8.62176	9.49328	8.30366	8.59234	12.5284	12.9478	13.0369	13.1337	12.79	10.8746	9.66301	11.6733	11.1427	9.54437	8.64414	13.8282	13.9598	13.2319	0.346016	0.728891	0	0	1	0	1	3	4	4	4	4	2	1	2	2	1	1	4	4	4		720.71		385.97	5907.94	7900.91
H3BJH6	8	8	Pan3	PAN2-PAN3 deadenylation complex subunit Pan3	11.8539	16.2175	16.2835	16.4424	15.8023	16.1418	16.7574	16.4252	16.6054	16.2666	14.7427	16.0636	16.4248	16.4859	16.1003	16.278	16.6284	16.641	0.344658	0.533566	0	3	6	8	7	6	6	7	8	7	7	4	7	7	8	7	7	8	7	3701.57	76201.4	79765.2	89053.1	57143.5	72302.4
Q8C878	14	13	Uba3	NEDD8-activating enzyme E1 catalytic subunit	15.996	14.3295	16.5495	15.9112	16.3437	16.4756	16.6208	16.1878	16.0828	16.0791	16.2731	16.6557	16.158	16.5506	16.4953	16.4083	16.6099	16.366	0.344356	0.171456	0	10	6	11	9	11	12	12	10	9	9	11	12	10	12	11	10	12	12	65352.7	20587.6	95915.8	61624.1	83168.1	91124.7
Q99PU7	4	4	Bap1	Ubiquitin carboxyl-terminal hydrolase BAP1	10.5899	14.521	14.3749	13.9568	14.2272	14.2153	14.3262	14.2802	14.3143	13.6133	14.302	14.4272	14.5469	14.0428	14.063	14.229	14.2834	14.3922	0.343755	0.428281	0	2	3	5	3	5	4	5	4	5	3	4	4	4	4	4	5	5	5	1541.29	23510.8	21246.4	15900.4	19179.1	19021
Q9CR57	17	17	Rpl14	60S ribosomal protein L14	20.4789	19.703	20.6921	20.633	20.4282	20.7898	18.6032	16.7083	18.6211	21.1624	20.6587	20.5814	20.2493	20.6376	20.9011	18.5699	18.7574	18.2239	0.342671	0.57343	0	16	13	17	17	15	17	10	9	9	17	16	17	15	16	17	10	10	10	1461377	853495	1.69412e+06	1.62609e+06	1.41094e+06	1.81279e+06
Q9JHX3	4	4	Il21r	Interleukin-21 receptor	10.7529	11.7807	7.72178	11.8368	11.6755	11.7763	14.7524	14.3792	14.8337	11.7637	9.33671	8.61996	12.2841	11.9849	9.56645	16.6006	16.2406	16.1954	0.342585	0.794187	0	2	2	1	2	2	2	3	3	3	2	1	1	2	2	1	4	4	4	1725.6	3518.45	211.1	3657.84	3271	3507.69
P62754	19	19	Rps6	40S ribosomal protein S6	20.2264	18.5956	20.1894	19.7892	20.382	20.4925	17.1363	17.3752	17.1686	20.2074	20.1968	20.0997	20.1665	20.4044	20.3018	17.6186	17.4157	18.0216	0.341923	0.606489	0	20	14	21	20	21	21	11	11	12	20	21	19	21	20	21	12	12	14	1226720	396129	1195717	906024	1.36648e+06	1.4752e+06
P84104	10	9	Srsf3	Serine/arginine-rich splicing factor 3	20.142	19.2195	20.5273	19.8383	20.556	20.2526	18.383	15.4898	18.0022	20.1853	20.2639	20.5134	19.8836	20.196	20.224	17.3813	18.1328	18.6978	0.34081	0.616689	0	12	9	12	10	12	11	9	7	8	10	10	12	9	10	12	8	9	9	1157018	610455	1.51128e+06	937414	1.54165e+06	1.24926e+06
Q99L20	4	1	Gstt3	Glutathione S-transferase theta-3	14.8287	14.5813	14.0237	14.6205	13.8721	14.3135	12.6702	14.1304	11.937	14.3648	15.3692	14.9721	14.9248	14.885	14.0006	12.9589	12.9282	13.6303	0.339618	0.451633	0	4	4	3	4	3	3	2	3	2	3	4	4	4	4	3	2	2	2	29098.5	24513.7	16655	25189.3	14994.5	20360.9
Q9Z1Q5	17	17	Clic1	Chloride intracellular channel protein 1	20.3526	18.7184	20.1241	19.9555	19.9269	20.3709	18.4856	17.9735	18.9608	20.2411	20.1826	20.2778	20.2025	20.4223	20.1271	18.6376	18.8662	18.9668	0.339509	0.389687	0	15	10	16	16	15	16	12	11	13	17	15	16	16	16	15	13	13	14	1.33889e+06	431331	1.14276e+06	1.0167e+06	996792	1.35598e+06
Q8C4Q6	5	5	Aida	Axin interactor, dorsalization-associated protein	13.7467	10.4943	13.9872	13.6227	13.7782	13.9756	14.1392	13.9258	14.2604	14.0351	14.0707	13.4624	13.6752	13.5846	13.7298	14.1704	14.2672	13.9856	0.338964	0.407473	0	4	2	4	3	4	4	5	5	5	5	5	3	4	4	3	5	5	5	13746.1	1442.43	16239.5	12614	14049.1	16109.8
Q8JZN5	20	20	Acad9	Complex I assembly factor ACAD9, mitochondrial	17.1856	14.4315	17.6615	16.975	17.6549	17.3969	17.5284	17.16	17.1696	17.1886	17.2211	17.5675	17.2591	17.5673	17.6475	17.4172	17.2559	17.084	0.338278	0.334049	0	17	9	23	16	20	18	19	19	17	18	14	20	19	19	21	18	20	19	149072	22096.4	207317	128822	206377	172577
E0CX98	3	3	Tmbim6	Bax inhibitor 1	15.3613	14.8402	14.7297	14.125	13.6685	14.5322	16.1804	15.0964	14.7907	15.2224	14.9581	13.9744	15.2591	14.3816	13.9133	15.0013	16.4085	17.2471	0.337972	0.449446	0	3	2	3	2	2	2	4	3	3	3	2	2	3	2	2	3	4	4	42091.9	29332.5	27168.6	17866.3	13020.4	23693.8
Q5QNQ6	4	2	Osbp2	Oxysterol-binding protein 2	14.1333	12.1855	14.2942	14.5215	14.5815	14.6086	13.7376	6.337	11.7671	12.9374	13.9151	14.0388	12.8004	15.1093	15.1625	13.0641	8.22858	13.9498	0.337753	0.768487	0	3	2	3	3	4	4	4	1	2	2	3	3	2	4	4	3	1	3	17969.7	4658.06	20090	23518.3	24517.2	24981.6
P27661	11	2	H2ax	Histone H2AX	21.3491	20.0224	21.393	21.3673	21.1155	21.3556	15.6574	14.5484	16.0908	21.5231	21.6362	20.6335	21.047	21.4616	21.4089	16.2167	15.2549	16.7498	0.336905	0.799988	0	11	11	14	12	13	13	8	7	8	13	13	13	14	13	13	8	7	9	2.67128e+06	1.06502e+06	2.75386e+06	2.70525e+06	2271894	2.68338e+06
D3YWK1	8	8	Wipi2	WD repeat domain phosphoinositide-interacting protein 2	11.8989	13.1123	14.9109	14.5304	13.6944	13.9979	15.2139	15.0909	14.9153	13.0824	14.12	15.0649	13.9672	14.2605	14.6909	15.1942	14.9722	15.0447	0.336889	0.448778	0	4	4	8	7	5	6	7	7	7	5	5	8	6	6	8	7	7	7	3818.9	8855.37	30805.8	23664.3	13256.5	16360.7
Q8C0S1	10	10	Dis3l	DIS3-like exonuclease 1	12.8617	13.2873	14.8133	14.9295	14.8257	14.6033	15.5584	15.6325	15.5553	14.2312	14.1502	15.1004	14.8143	15.2127	15.2085	15.9462	15.2562	15.1757	0.336486	0.38537	0	4	4	6	7	7	6	9	10	9	5	5	8	7	8	8	10	9	8	7443.04	9997.29	28790	31204.6	29038.5	24890.2
Q9CZJ1	14	14	Utp11	Probable U3 small nucleolar RNA-associated protein 11	16.2322	14.3071	16.4574	16.4379	16.4232	16.3406	17.1236	17.1445	17.1262	16.8872	16.2614	16.6699	16.3231	16.3335	16.7527	17.219	17.0432	17.1291	0.336266	0.299793	0	10	6	9	10	10	11	12	12	12	13	9	13	10	10	12	12	12	12	76978.5	20271.3	89986.4	88775.3	87875.9	82986.4
A2AFY7	4	4	Ttc17	Tetratricopeptide repeat protein 17	9.36525	12.5977	13.6898	11.9541	12.0699	14.7973	13.4071	14.5515	14.2575	13.8448	13.0475	12.082	9.69343	13.9961	12.8987	15.0337	14.2198	14.8938	0.335523	0.677159	0	1	2	3	2	2	4	3	4	4	3	2	2	1	3	2	4	3	4	659.51	6198.67	13214.5	3967.63	4299.44	28472.4
E9Q5L3	8	8	Acadsb	Short/branched chain specific acyl-CoA dehydrogenase, mitochondrial	13.7787	13.9382	15.2479	13.8189	14.2189	12.7454	17.3952	16.4498	16.4951	14.6791	13.3129	14.2518	15.4796	13.2978	14.3072	16.5341	17.5747	17.6649	0.334905	0.668584	0	4	4	5	4	4	3	8	7	7	5	3	4	6	3	4	6	8	8	14054.2	15696.8	38911.4	14450.7	19068.4	6866.87
Q9Z2X2	4	4	Psmd10	26S proteasome non-ATPase regulatory subunit 10	15.9634	15.3036	14.6098	15.1973	14.9165	14.8711	11.0036	9.15175	13.1675	15.2672	15.6897	14.6171	15.2205	15.6596	14.9348	10.9543	11.7882	13.0642	0.334547	0.732516	0	5	5	4	5	4	3	2	2	3	4	5	4	5	5	5	2	3	4	63893	40443.9	25003.1	37570.5	30924.8	29967.5
A0A3Q4L2S1	7	7	Nubp2	Cytosolic Fe-S cluster assembly factor NUBP2	14.973	15.6796	15.497	14.7859	16.8931	16.5526	17.3566	16.6288	16.1189	16.1186	15.9621	15.2135	16.3313	16.3395	15.8712	17.0755	17.3177	17.2638	0.334169	0.388264	0	3	4	4	3	6	4	6	4	4	4	4	3	5	5	4	5	6	6	32161.1	52485.4	46245.4	28248.8	121713	96123.9
P62862	4	1	Fau	40S ribosomal protein S30	17.7469	16.7172	19.0561	18.711	18.6551	18.0127	14.6091	13.9907	17.0994	18.8562	19.2104	18.557	17.9518	18.3895	18.9603	14.9808	14.5161	16.1796	0.333741	0.699875	0	4	4	5	5	5	4	4	3	3	5	5	5	4	4	5	4	4	4	219959	107737	545067	429101	412808	264458
E9Q6E2	4	3	Cdk8	Cyclin-dependent kinase 8	13.1678	14.8149	14.8077	12.7563	14.8549	15.0257	15.3127	15.1783	15.242	14.8646	14.6836	14.6618	14.7089	14.7394	14.5981	15.5285	15.1674	15.2112	0.333696	0.327408	0	2	3	3	2	3	3	4	4	4	3	3	3	3	3	3	4	4	4	9202.2	28822.5	28678.7	6918.64	29633.2	33355.9
A0A0R4J025	6	5	Rcbtb1	RCC1 and BTB domain-containing protein 1	15.0155	14.2669	14.6832	12.9686	14.972	15.2407	11.2958	14.4167	13.7271	14.6626	14.8794	14.6687	14.6297	14.8485	14.4913	13.036	14.3152	14.0573	0.333566	0.479164	0	5	4	6	3	7	7	3	6	5	5	5	5	5	6	6	4	6	5	33122.6	19713.7	26307.3	8015.55	32137.3	38717.3
Q9CX86	11	11	Hnrnpa0	Heterogeneous nuclear ribonucleoprotein A0	18.1886	16.7708	18.9173	19.36	18.6468	18.8943	13.9722	17.4245	18.0034	17.9291	18.3334	18.2049	18.1437	18.4259	18.7921	17.3859	17.6933	18.2681	0.333162	0.563934	0	7	5	9	10	8	8	4	6	6	7	7	7	7	7	9	5	5	6	298751	111819	495095	672890	410446	487239
E9Q3P4	20	20	Cenpf	Centromere protein F	16.314	16.1045	15.7515	16.2337	12.8787	15.7045	15.1435	15.2737	15.5091	15.4901	15.8757	16.4543	15.8249	15.9439	15.4845	15.5754	15.3783	15.8743	0.33201	0.375676	0	15	12	15	16	8	14	13	16	16	11	13	19	12	14	13	17	16	18	81468.6	70460.9	55167	77060	7531.5	53399.9
E9Q6E9	3	3	Simc1	SUMO-interacting motif-containing protein 1	12.4298	8.88118	12.8259	12.8083	12.4916	12.4743	11.688	12.1798	12.3541	12.7598	12.3733	12.416	12.4024	12.5534	12.5494	12.1902	11.8263	12.0502	0.331968	0.439303	0	2	1	3	3	2	2	2	3	3	2	2	3	2	2	3	3	2	3	5517.34	471.52	7260.83	7172.79	5758.87	5690.51
P59708	6	6	Sf3b6	Splicing factor 3B subunit 6	16.3423	16.3106	16.8176	16.274	16.2871	16.1995	14.8873	15.9992	16.2148	16.7879	16.3131	16.7229	16.4812	16.2877	16.3487	16.3164	16.3609	16.6988	0.331688	0.0935289	0	6	7	7	6	6	6	5	7	5	7	6	7	6	7	6	6	7	7	83085.8	81279.8	115502	79241.1	79963.7	75257.6
Q99KW9	6	6	Itfg1	T-cell immunomodulatory protein	13.2094	13.2115	13.0108	14.2753	13.8908	13.8395	15.0787	15.0913	15.001	14.1828	14.1862	14.2026	14.038	13.9788	13.9044	15.0031	15.0244	15.0727	0.331627	0.320912	0	3	3	3	4	4	5	6	6	6	4	4	5	5	4	4	6	6	6	9471.37	9485.21	8253.54	19828.7	15190	14659.1
P19137	4	4	Lama1	Laminin subunit alpha-1	13.2961	9.62954	15.0613	15.4164	13.9682	9.7253	15.4446	13.8302	13.7886	14.3158	14.1929	14.3646	13.8129	14.0186	14.8988	13.9687	11.6326	11.9322	0.330735	0.695132	0	2	1	3	4	2	1	3	2	2	2	2	2	2	2	3	2	1	1	10058.6	792.1	34189.9	43733.3	16027.2	846.46
Q8VE70	8	8	Pdcd10	Programmed cell death protein 10	17.3059	15.9614	17.5253	17.0001	17.2466	17.3253	17.8279	17.6042	17.274	17.6028	17.3586	17.3475	17.1005	17.1233	17.7072	17.5624	17.9733	18.2708	0.330656	0.150458	0	7	5	9	7	7	8	8	8	7	8	8	8	8	7	9	8	8	8	162025	63804.2	188640	131081	155502	164222
E9QL80	4	4	Lpgat1	Acyl-CoA:lysophosphatidylglycerol acyltransferase 1	11.915	12.9787	12.6246	12.6354	12.026	11.7112	13.6873	12.4979	13.5839	12.8361	12.9419	12.5096	12.1338	12.0543	12.2122	13.9507	13.9658	14.0198	0.329375	0.372631	0	2	3	3	3	2	2	4	3	4	3	3	3	2	2	2	4	4	4	3861.69	8072.15	6314.93	6362.56	4170.53	3352.82
E9QN99	5	5	Abhd14b	Abhydrolase domain containing 14b (Fragment)	12.0632	12.2454	14.4428	14.2953	14.2218	14.5788	15.0759	15.0224	15.0034	14.4693	14.3833	11.6379	15.162	15.0335	14.6705	14.8572	14.8381	14.8609	0.329305	0.539889	0	2	2	4	3	3	4	4	5	4	4	3	2	4	4	4	4	5	5	4279.3	4855.39	22270.4	20105.7	19106.3	24471.9
Q3UN04	4	4	Usp30	Ubiquitin carboxyl-terminal hydrolase 30	12.137	13.34	13.0797	13.8857	13.817	13.7808	12.6211	12.6126	12.7867	12.224	12.681	13.161	14.4457	13.2533	14.9723	13.1893	13.6032	13.477	0.327358	0.361939	0	2	3	3	4	4	4	2	2	2	2	2	3	4	3	4	2	3	3	4503.96	10369.2	8657	15136.4	14432	14074.5
Q9D6J6	4	4	Ndufv2	NADH dehydrogenase [ubiquinone] flavoprotein 2, mitochondrial	14.6512	14.6782	15.1056	14.8137	15.0313	14.4549	14.1436	14.1101	11.0014	14.7833	14.6721	15.0497	14.9741	14.8619	15.0235	13.6174	13.9548	13.9984	0.327249	0.483325	0	4	5	5	5	5	4	3	3	2	4	5	5	5	4	5	3	3	3	25730.1	26216.2	35257.4	28798.9	33487.6	22457.7
P49586	9	9	Pcyt1a	Choline-phosphate cytidylyltransferase A	14.3594	13.3269	15.0889	14.5739	14.9172	14.5467	15.6366	15.0813	15.325	15.1412	13.5246	15.4315	15.0323	15.1127	14.6077	15.6267	15.4884	15.8282	0.326389	0.324291	0	5	4	7	6	7	5	7	6	7	7	4	9	6	7	6	7	7	7	21018.3	10275.5	34851.1	24388.8	30940.6	23933.2
Q3UQA7	3	3	Selenoh	Selenoprotein H	14.9118	15.4892	15.3851	15.1205	15.0072	13.6261	15.4606	15.6549	16.6238	15.6767	15.1693	15.5907	15.1181	14.9757	15.0432	16.0974	16.4546	16.0897	0.326268	0.321893	0	3	4	4	3	4	2	3	4	4	4	3	4	3	3	3	3	3	4	30824.8	45994.9	42792.7	35622.2	32931.3	12643.8
Q8C1E7	6	6	Tmem120a	Ion channel TACAN	15.233	12.1387	15.0786	15.1642	15.2849	15.3345	15.1869	15.2568	15.1136	15.5548	15.1729	14.9957	15.1506	15.2983	15.3586	15.2785	15.0456	14.8659	0.325528	0.364707	0	4	2	4	4	5	5	4	5	5	5	4	4	4	4	5	5	4	5	38511.7	4509.2	34602.9	36717.5	39922.4	41317.6
Q8BU14	7	7	Sec62	Translocation protein SEC62	14.5602	15.7044	16.5699	14.7115	14.7379	15.5332	17.8219	16.6127	17.591	13.6359	16.8612	16.4051	16.017	15.156	16.4522	16.3723	18.0091	17.8527	0.324299	0.599296	0	4	4	6	4	4	5	7	6	7	3	7	5	5	4	6	5	7	7	24158.5	53394.8	97281.9	26829.7	27324.7	47419.1
Q8CET2	3	3	4921504E06Rik	RIKEN cDNA 4921504E06 gene	12.5326	10.7265	12.2114	12.7209	11.5363	11.2654	8.77571	8.20972	13.0374	9.99185	11.3342	10.3151	10.623	11.584	11.2949	15.8512	9.35492	13.5815	0.32385	0.718307	0	2	1	2	2	1	1	0	0	1	1	1	1	1	1	1	2	0	1	5925.02	1694.3	4742.38	6751.3	2970.17	2461.6
Q3UUV5	9	9	Skap1	Src kinase-associated phosphoprotein 1	15.9962	12.4341	15.9776	16.0757	15.9038	16.1168	15.792	15.581	15.5351	16.1514	15.553	15.7128	15.886	15.9318	15.7384	15.4539	15.9574	15.9405	0.32366	0.424408	0	6	3	7	6	6	7	7	6	7	7	5	6	7	7	6	7	7	7	65362.9	5534.06	64527.9	69065.1	61309.8	71064.9
A0A0R4J1L0	7	7	Tnk2	Activated CDC42 kinase 1	10.6864	14.892	14.6254	14.7077	15.0332	14.9083	14.8892	14.9971	14.8854	14.682	14.6839	14.5348	14.9223	14.7716	14.7182	14.9669	14.6359	14.6169	0.32307	0.500663	0	3	5	7	6	7	7	7	7	7	6	6	6	7	6	7	7	7	7	1647.92	30403.5	25274.1	26758.4	33531.9	30751
P62897	12	12	Cycs	Cytochrome c, somatic	19.2224	17.9275	18.8483	18.7503	19.3154	19.3386	17.3877	17.1189	17.6186	19.1623	19.7884	18.6527	19.3775	19.7988	19.6956	17.0365	17.5518	17.3714	0.323035	0.50463	0	15	10	16	15	15	16	9	9	9	15	14	15	15	16	16	9	9	10	611667	249291	471968	440958	652414	662991
Q9Z123	9	9	Sema4f	Semaphorin-4F	17.7185	17.5577	17.227	17.5913	17.1384	16.6676	9.33606	9.60739	9.6768	17.0024	17.343	17.413	17.3443	17.117	17.3249	9.25762	8.82286	13.7976	0.322427	0.857577	0	13	11	13	13	13	11	2	4	2	11	12	13	11	13	13	1	2	6	215674	192932	153402	197475	144273	104097
A0A0R4J1E9	4	4	Hif1a	Hypoxia-inducible factor 1-alpha	13.0034	13.2518	10.9869	12.7474	12.6577	10.9962	12.7086	13.0765	13.5377	13.4431	12.6043	13.1241	13.1129	11.7976	9.5171	14.157	14.1295	13.9787	0.322012	0.58682	0	3	3	2	3	4	2	3	4	4	4	3	4	4	2	1	4	4	3	8211.5	9754.23	2029.54	6876.09	6461.5	2042.62
E0CY81	4	3	Gm44505	E3 ubiquitin-protein ligase ZFP91	15.6252	15.8658	15.332	15.7311	15.5238	15.4927	11.939	14.5496	14.7945	15.8872	15.5612	15.5824	15.7722	15.548	15.4012	14.6867	14.8039	14.5058	0.321644	0.475588	0	4	4	4	4	4	4	2	3	3	4	4	4	4	4	4	3	4	4	50541.3	59716.2	41247	54392.5	47111.6	46108.2
Q9D483	7	7	Polr3c	DNA-directed RNA polymerase III subunit RPC3	15.4926	11.963	15.4683	15.3864	15.3793	15.4883	15.3824	15.4003	15.5193	15.5039	15.3318	15.6486	15.4504	15.4129	15.3495	15.3152	15.2224	15.1363	0.321239	0.422245	0	7	3	7	6	7	6	6	6	6	7	6	7	7	7	7	6	6	6	46102.4	3992.38	45333.6	42831.2	42622.6	45966.3
Q9ES70	5	3	Nek6	Serine/threonine-protein kinase Nek6	14.5868	15.0445	14.7118	14.4137	15.1346	14.9146	14.4982	14.0347	15.1712	14.45	14.6519	14.7529	15.1919	14.9093	15.2228	15.4042	15.447	15.3685	0.320927	0.08565	0	3	4	3	3	5	4	4	3	4	3	3	4	4	4	5	5	5	4	24608	33793.6	26834	21825.5	35973.3	30885.1
A2AS98	7	5	Nckap1	Nck-associated protein 1	14.8365	12.9789	14.8811	14.8132	14.4622	14.8889	15.4752	15.2691	15.1719	15.3701	14.9978	15.3485	14.5339	14.8824	14.8549	15.4341	14.9394	15.2946	0.319856	0.241671	0	5	3	4	5	4	4	7	7	7	7	5	6	4	5	6	7	7	7	29257.1	8072.83	30175.6	28788	22571.8	30339.9
Q62469	4	4	Itga2	Integrin alpha-2	8.62176	9.29329	8.37321	8.35652	9.30793	10.0861	13.9909	12.9575	13.0611	8.85197	9.60509	9.19679	9.71172	10.3294	9.25267	13.8099	13.9831	12.1857	0.319788	0.755151	0	0	1	1	0	1	2	4	3	3	1	0	0	2	2	1	4	4	3		627.42	331.58		633.82	1086.97
P70349	9	9	Hint1	Adenosine 5'-monophosphoramidase HINT1	18.2976	18.291	18.4019	18.4775	18.2407	17.9815	16.6086	16.8781	17.2362	18.439	18.239	18.5097	18.4212	17.9381	18.3118	16.9663	17.7562	18.7096	0.319753	0.297723	0	7	6	8	7	7	6	6	6	8	8	6	8	8	6	7	6	8	8	322197	320736	346349	365003	309747	258800
E9QNT5	4	4	Taf12	Transcription initiation factor TFIID subunit 12	15.825	15.4446	16.0016	15.8917	15.8571	15.9156	15.6973	13.4315	15.6412	15.4823	16.1506	16.1891	16.1373	15.9296	15.8382	15.6688	15.4158	15.7707	0.319622	0.276872	0	4	3	4	4	4	4	3	2	3	3	4	4	4	4	3	3	3	3	58050.6	44594.9	65610.1	60795.2	59357.6	61813.2
E9QPX3	6	6	Ndufs4	NADH dehydrogenase [ubiquinone] iron-sulfur protein 4, mitochondrial	13.6745	14.4143	14.6589	14.1825	14.8238	13.8842	15.9038	15.2989	15.2511	14.7838	14.2613	14.9508	14.5838	14.3995	14.9197	15.34	15.8355	15.8738	0.317336	0.320652	0	3	4	4	4	5	4	5	3	4	5	3	5	5	4	5	3	4	4	13074.4	21833.6	25868.9	18593.9	29000.8	15120
Q9D6J1	4	4	Cers4	Ceramide synthase 4	13.5591	13.7445	15.0928	15.0569	14.7358	15.7718	15.7661	15.7782	15.8165	14.721	14.8439	15.3273	15.9323	14.8829	14.7918	15.9147	15.8907	15.8709	0.31709	0.371996	0	2	2	3	3	3	4	3	3	3	2	3	3	4	3	3	3	3	3	12069.5	13725	34945.6	34085.9	27285.2	55948.9
Q6IQX7	4	4	Chpf	Chondroitin sulfate synthase 2	13.2545	13.1943	7.40361	13.0887	13.4187	12.6353	13.0991	13.6726	13.5994	11.3259	12.0912	12.6601	13.2357	13.2723	12.7943	14.2217	13.3856	13.2212	0.31576	0.663909	0	3	3	1	3	4	3	4	4	4	2	2	3	4	3	3	4	4	4	9772.25	9373.32	169.32	8711.55	10950.2	6361.95
E9PYR1	5	5	Fbxl18	F-box and leucine-rich repeat protein 18	10.6461	13.2293	13.9347	13.0098	13.6004	13.1364	14.4821	13.597	13.7523	10.0445	14.0203	14.0062	13.833	13.7695	14.0695	14.1096	14.1208	14.2515	0.315198	0.589317	0	2	3	5	3	4	3	5	4	4	2	4	5	4	4	4	4	4	5	1602.53	9602.96	15658.9	8247.94	12420.4	9004.13
A2AU62	23	23	Raly	RNA-binding protein Raly	19.0282	16.7213	19.4886	19.1679	19.5471	19.845	15.1635	12.3408	13.7731	18.9953	19.637	17.9763	18.3388	19.6545	19.5721	14.689	13.9071	15.1372	0.314638	0.800281	0	19	16	22	19	21	21	12	10	10	20	20	19	19	22	21	11	11	12	534646	108044	735639	588989	766070	941743
P22935	5	5	Crabp2	Cellular retinoic acid-binding protein 2	15.8461	15.8125	15.7724	15.9694	15.7643	15.4199	13.1483	13.5213	11.9002	15.5405	15.8303	16.1348	16.0537	15.3125	15.8738	13.4804	13.6579	14.1005	0.314437	0.618301	0	5	5	6	6	6	5	4	4	3	5	5	6	6	5	6	5	5	5	58906.4	57550.5	55972.4	64160.6	55658.9	43839.6
Q3UHX2	7	7	Pdap1	28 kDa heat- and acid-stable phosphoprotein	17.0112	14.7189	17.0845	16.991	16.9861	17.0849	17.7147	17.4598	17.5019	17.2121	16.9072	17.0879	17.0472	17.0452	17.1787	17.6056	17.5472	17.75	0.314243	0.324022	0	5	3	5	5	5	5	6	6	6	6	5	5	6	6	6	6	6	7	132094	26966.2	138974	130257	129817	139018
Q9CQ06	6	6	Mrpl24	39S ribosomal protein L24, mitochondrial	13.7768	15.2693	15.139	15.1806	15.4392	15.0043	15.1064	15.5675	15.5648	15.1412	15.6012	15.0194	15.2921	15.5405	15.1131	15.8192	15.7135	15.632	0.313817	0.145573	0	3	4	5	4	5	5	5	5	5	4	5	5	5	6	4	5	6	5	14036	39491.6	36082.1	37136.9	44429.8	32866.7
Q5SQB0	21	21	Npm1	Nucleophosmin	20.016	18.8339	21.3359	21.3475	21.6621	21.6423	16.5094	15.4613	16.9199	20.4779	21.6324	20.8714	19.4757	21.5727	21.4671	17.3094	15.9497	17.7893	0.313031	0.775788	0	20	17	25	26	25	24	11	12	13	22	25	23	20	23	24	13	12	15	1.06028e+06	467274	2646952	2.66837e+06	3318598	3.27319e+06
Q6P069	11	11	Sri	Sorcin	16.98	16.4584	17.5956	16.9132	17.0859	17.0915	18.7114	17.6855	17.6997	17.3952	17.1028	17.3434	17.0732	16.9081	17.2038	18.2698	18.5791	19.1579	0.31246	0.375685	0	8	7	9	8	9	10	10	9	8	9	8	9	8	8	8	10	11	11	129269	90045.3	198062	123419	139117	139651
P11352	10	10	Gpx1	Glutathione peroxidase 1	13.9432	11.8989	14.8725	12.7796	12.8846	14.8154	16.5271	15.509	16.6412	14.2104	13.2119	13.4344	14.2532	12.7808	14.0299	16.9977	17.0959	16.6674	0.312223	0.700655	0	6	3	8	4	4	7	10	7	10	6	4	5	7	4	6	9	10	9	15752	3818.68	29995.7	7031.58	7562.35	28833.1
E9PUA7	9	9	Tpd52	Tumor protein D52	15.8325	16.0574	16.0081	15.7396	15.5749	15.9139	15.8511	15.4157	12.1098	16.087	15.8604	16.07	15.7784	15.7599	15.594	15.3064	14.8998	15.9418	0.310528	0.485436	0	7	7	9	6	8	7	6	6	4	8	7	8	7	6	7	6	5	8	58351.8	68197.9	65904.6	54713.9	48809.1	61737.2
A2RT67	11	11	Dennd3	DENN domain-containing protein 3	12.4559	13.5002	14.706	13.1121	15.103	13.2652	16.0467	16.42	16.2407	14.5697	14.8673	14.7798	13.7324	15.3684	14.7188	15.9761	15.0392	14.5828	0.309425	0.575762	0	4	5	7	5	7	5	10	11	10	7	7	8	5	8	7	10	9	7	5618.22	11586.7	26727.2	8853.84	35192.2	9845.35
Q8C6L5	7	7	Cgas	Cyclic GMP-AMP synthase	12.4221	12.5563	15.0954	14.9794	15.0655	14.2562	15.2509	15.2452	15.4352	14.4353	14.5855	14.7962	14.329	14.3399	14.4014	15.2857	15.4595	15.4485	0.30829	0.477103	0	3	3	7	7	7	5	7	6	7	4	5	6	4	5	5	7	7	7	5488.22	6023.1	35007.6	32302.4	34290.7	19568.3
P61294	6	2	Rab6b	Ras-related protein Rab-6B	16.9777	17.0591	17.2853	16.2871	17.0598	17.2664	16.9773	16.2304	16.108	17.3206	17.2808	16.9823	16.8413	16.9051	16.9945	16.9921	17.1048	17.6038	0.308236	0.0963454	0	5	5	5	4	5	5	5	5	4	6	5	5	5	5	5	5	5	5	129058	136557	159731	79966.3	136618	157651
Q61286	5	5	Tcf12	Transcription factor 12	12.1101	8.83652	8.30366	11.8831	9.91462	10.1466	13.5637	13.8631	14.6092	12.2286	12.8778	7.89694	10.6986	10.4208	10.286	13.6551	14.2619	13.6763	0.307922	0.769258	0	3	1	0	3	2	2	5	5	5	3	3	1	2	2	2	4	5	5	4420.75	457.15		3777.15	965.16	1133.55
B1AQD9	5	4	Unc119	Protein unc-119 homolog A	15.0258	15.6728	15.0027	12.9676	14.8485	15.7657	15.9568	14.9685	15.7258	15.6118	15.3332	14.9015	15.6365	15.0731	15.6225	14.8397	15.8102	15.874	0.307577	0.362596	0	3	4	3	2	3	4	5	3	5	4	3	3	4	3	5	3	5	5	33358.9	52239.3	32829.6	8010.32	29501.1	55713.1
P62313	8	8	Lsm6	U6 snRNA-associated Sm-like protein LSm6	17.2831	16.6385	17.1312	17.0486	17.3347	17.3519	17.7165	17.3007	17.4544	17.6791	17.3093	17.6023	17.3378	17.3043	17.4874	17.4333	17.6878	18.1764	0.306437	0.037905	0	7	6	6	7	6	7	6	6	6	7	6	8	6	7	7	5	6	7	159485	102021	143553	135565	165303	167284
D3Z286	5	5	Tmppe	Transmembrane protein with metallophosphoesterase domain	13.5228	13.6211	13.4615	13.9978	14.1176	13.4121	14.9556	15.0373	15.1555	13.7241	13.5699	13.6906	14.0536	13.7736	15.1655	14.9028	15.7285	15.4271	0.30603	0.422742	0	2	2	2	3	3	2	4	4	4	2	2	2	3	3	4	5	5	5	11770	12599.9	11280	16359.2	17776	10900.7
O35943	4	4	Fxn	Frataxin, mitochondrial	13.2698	14.4913	14.5426	14.4613	14.5933	14.9001	14.545	14.7835	14.9845	14.222	14.351	14.4628	14.4686	14.969	14.5644	15.2571	15.3874	15.6401	0.305682	0.218643	0	2	3	3	3	3	3	3	3	3	3	3	3	3	4	3	4	3	4	9876.79	23030.5	23865.4	22556.6	24718.5	30575.6
Q8C0L9	4	4	Gpcpd1	Glycerophosphocholine phosphodiesterase GPCPD1	13.7822	14.0975	13.7289	13.5738	8.94594	13.8924	13.5991	13.5534	13.4378	12.2116	13.7386	13.4781	14.0337	13.8215	12.6165	13.8977	14.0825	13.4756	0.304966	0.603544	0	3	3	3	3	1	3	3	3	4	2	3	3	4	3	2	3	3	3	14087.8	17530	13577.5	12192.9	493.17	15206.7
Q9JMA2	6	6	Qtrt1	Queuine tRNA-ribosyltransferase catalytic subunit 1	13.8211	13.5172	14.1601	14.1112	14.5859	14.2481	14.1073	13.7999	14.463	14.4331	14.4873	14.3202	13.9256	14.5742	14.2919	14.7418	13.9308	14.8525	0.304861	0.0663812	0	3	3	4	4	5	5	3	4	5	4	4	5	4	5	4	5	4	5	14473.5	11724.2	18307.2	17696.8	24592.4	19458.2
Q9JHE7	5	5	Tssc4	Protein TSSC4	15.5808	15.5734	15.7296	15.4849	15.5468	15.4206	15.9404	15.0217	16.0123	15.6936	15.4802	15.6642	15.5824	16.5302	15.6388	15.9807	16.2337	16.2485	0.304659	0.0694741	0	4	4	5	4	4	4	5	3	5	4	4	4	4	6	4	5	5	5	49009.6	48758.7	54334.2	45859.4	47869.4	43858.2
P03911	8	8	Mtnd4	NADH-ubiquinone oxidoreductase chain 4	17.7158	17.4129	17.2797	17.7924	17.7219	17.271	15.3152	15.0908	15.4837	17.6206	17.4709	17.5531	17.2697	17.7427	17.9874	16.2166	15.7299	16.2242	0.303543	0.523919	0	8	8	8	8	9	8	7	5	6	8	8	8	8	9	9	7	7	8	215265	174505	159116	227008	216180	158157
B1AU74	10	10	Mospd2	Motile sperm domain-containing protein 2	11.8967	14.3254	15.0795	15.0244	14.6346	15.0603	15.429	15.6454	15.8803	15.0225	13.5377	15.0667	15.1027	15.0696	13.9878	15.9835	15.8856	16.0415	0.30243	0.543796	0	3	5	8	6	6	7	9	9	10	6	4	7	7	7	5	10	10	10	3813.06	20529.1	34623.3	33326.4	25436.7	34165.9
A0A0G2JFS9	3	3	Atg4a-ps	Cysteine protease ATG4A	9.26608	12.308	12.7395	8.35652	8.97386	8.75679	13.21	13.1739	13.2774	9.08562	9.60509	12.6008	9.4707	13.0574	9.38718	13.2428	13.0435	13.2887	0.302193	0.761104	0	1	2	2	0	0	1	3	3	3	0	0	2	1	3	0	3	3	3	615.7	5070.91	6838.79			432.57
Q9CR59	4	4	Gadd45gip1	Growth arrest and DNA damage-inducible proteins-interacting protein 1	14.8514	12.4432	14.089	14.1347	15.2088	14.6618	10.794	9.93387	10.7915	11.9934	14.4694	14.5987	14.9998	16.0078	15.393	11.0339	10.3171	10.8144	0.302139	0.767328	0	4	2	4	4	5	5	2	2	2	2	3	4	5	5	5	2	2	2	29560	5569.12	17426.5	17987.4	37870.4	25921.1
P62082	18	18	Rps7	40S ribosomal protein S7	21.6462	20.7715	21.5123	21.5185	21.7912	21.8465	17.7592	17.7998	17.7007	21.1487	21.6634	21.5523	21.4993	21.7619	21.8332	19.0467	17.6475	18.9098	0.301894	0.71932	0	17	15	19	18	19	18	11	11	13	15	17	20	18	18	18	16	12	15	3282217	1.78999e+06	2.99113e+06	3.00405e+06	3.62907e+06	3770869
E9Q7Y0	3	3	Foxm1	Forkhead box protein M1	13.8815	14.1205	13.355	13.3628	13.0851	12.7867	8.22038	12.1824	12.2161	13.5402	13.4342	13.1706	13.1371	13.2228	12.8911	12.065	12.1177	12.3487	0.301876	0.631323	0	3	3	3	2	3	2	1	2	2	3	2	3	3	3	2	2	2	2	15092.5	17811.8	10477.4	10534.4	8689.63	7066.12
Q9DCW4	13	13	Etfb	Electron transfer flavoprotein subunit beta	17.1882	16.3754	17.9652	17.0177	17.5155	17.2752	19.0471	18.4144	18.5203	17.5759	17.3257	17.8585	17.6237	17.4777	17.6359	18.7864	18.6392	19.1127	0.301862	0.411634	0	10	8	13	10	11	11	11	12	12	12	10	13	12	11	12	11	11	12	149340	85010.4	255894	132693	187370	158613
Q7TSH4	7	7	Ccp110	Centriolar coiled-coil protein of 110 kDa	14.3348	14.349	14.463	14.4543	14.127	11.9839	14.1577	14.3158	14.0508	15.0467	14.1023	14.4941	14.3203	13.9938	14.5828	14.2072	14.0267	14.1744	0.301341	0.302383	0	4	4	6	6	5	3	6	6	6	7	4	6	5	5	6	6	6	7	20663.5	20868	22583.5	22448.4	17891.9	4050.66
Q8C503	4	4	Sit1	Signaling threshold-regulating transmembrane adapter 1	13.6482	13.8459	14.8308	13.3691	14.0551	15.1811	17.0059	16.6011	16.6876	14.4829	14.0607	14.3644	14.1708	13.9613	14.5922	17.231	17.6062	17.4624	0.300794	0.678589	0	2	2	3	2	2	3	4	4	4	2	2	3	2	2	3	4	4	4	12838.5	14724.4	29142.2	10580	17021.4	37150.3
H3BL08	3	2	Cers6	Ceramide synthase 6	13.81	9.11569	13.0029	14.0755	14.0105	13.568	11.4604	12.1796	12.0771	13.5083	13.4339	14.1253	13.9005	14.0639	14.1967	12.1342	12.0908	8.5452	0.299921	0.715395	0	3	1	2	3	3	3	2	2	2	3	2	3	3	3	3	2	2	1	14362.6	554.75	8208.2	17264.1	16504.1	12144.3
P17012	6	6	Zfx	Zinc finger X-chromosomal protein	13.8997	11.0364	14.0352	14.2984	14.0297	14.3246	13.8209	13.2397	13.587	13.1184	14.773	14.2614	13.9936	14.7428	14.5571	11.5517	14.371	13.6011	0.299827	0.542392	0	4	2	4	4	4	4	4	3	4	3	4	4	3	5	5	2	4	3	15283.9	2100.39	16788.7	20148.7	16724.7	20518.3
P15261	4	4	Ifngr1	Interferon gamma receptor 1	8.62176	11.0744	9.99587	12.2243	10.7931	9.28774	16.235	16.2097	16.6341	8.8653	12.1429	9.15843	13.2993	9.65607	12.3478	16.6557	16.1643	15.4804	0.299353	0.840339	0	0	2	2	2	2	1	3	4	3	1	2	1	3	1	2	4	4	3		2156.39	1021.07	4784.85	1774.42	625.01
Q9JJ06	5	5	C1galt1	Glycoprotein-N-acetylgalactosamine 3-beta-galactosyltransferase 1	8.98197	9.0182	11.9006	11.7471	14.3001	14.3463	14.9336	15.0358	15.2366	8.97882	12.3031	12.2439	13.448	13.6115	12.3844	14.6545	15.2984	15.2713	0.29928	0.782886	0	1	1	2	2	4	3	4	4	5	1	2	2	3	3	2	3	5	5	505.64	518.5	3823.42	3437.44	20172.6	20829.1
P56391	5	5	Cox6b1	Cytochrome c oxidase subunit 6B1	15.9116	15.7273	16.5322	15.6192	15.7187	15.6843	16.8614	16.9596	17.2508	16.521	16.3038	16.3358	16.2595	15.7611	15.6188	17.3584	17.3891	17.4083	0.298983	0.355927	0	5	5	6	6	5	6	6	6	6	6	5	6	6	5	6	6	6	6	61642.1	54248.5	94773.2	50333.7	53924.6	52654.8
A0A2I3BPN6	8	8	Taf4	TATA-box binding protein associated factor 4	15.4069	13.2966	15.8755	15.5976	15.8481	15.8136	16.3627	16.2032	16.2188	15.9145	15.4669	15.8638	15.5025	15.5582	15.8293	16.1295	16.4885	16.5604	0.298958	0.38733	0	6	4	7	6	7	7	9	8	8	7	6	7	5	7	7	7	9	9	43444.3	10062.1	60118.2	49585.3	58987.9	57590.8
P99026	12	12	Psmb4	Proteasome subunit beta type-4	19.1549	17.8222	19.5013	19.0371	19.3259	19.2854	19.3575	19.5638	19.8001	19.4699	19.0444	19.3506	19.331	19.3122	19.3188	19.8473	19.9806	19.8706	0.297464	0.188358	0	12	8	11	12	12	12	8	10	10	13	10	12	11	12	11	10	10	10	583710	231749	742131	537949	657183	638982
Q8R404	4	4	Micos13	MICOS complex subunit MIC13	17.0094	16.7607	16.396	15.6367	16.587	16.7815	11.1135	10.0311	10.3182	16.7879	17.0764	16.7573	16.6372	16.9716	16.8647	11.7203	9.75879	10.7357	0.297287	0.840208	0	5	5	5	4	5	5	2	2	1	5	5	4	4	4	5	2	1	1	131931	111042	86235.8	50947.6	98445.1	112649
Q8CGP2	21	1	Hist1h2bp	Histone H2B type 1-P	21.2979	20.545	22.212	21.7801	21.9101	21.304	17.4798	16.9142	17.4941	22.0475	22.1556	21.2844	21.2817	21.6705	21.9053	17.4044	17.26	18.5852	0.295272	0.769732	0	22	20	27	27	25	22	16	15	14	27	26	27	25	24	27	14	15	16	2.57812e+06	1.52989e+06	4858195	3.60133e+06	3.94087e+06	2.58913e+06
E9PZ21	6	6	Rbms1	RNA binding motif, single stranded interacting protein 1	14.1791	10.2126	14.708	14.7028	14.1221	14.7254	15.2024	14.7277	15.7382	14.0533	14.309	14.3161	14.2904	14.2318	14.2035	15.4387	15.0696	15.0577	0.294651	0.60359	0	5	1	6	6	4	5	5	4	5	4	4	5	4	5	5	5	5	5	18549.6	1186.55	26764.4	26667.4	17831.2	27088.1
Q9CQS5	4	4	Riok2	Serine/threonine-protein kinase RIO2	11.9589	10.1493	13.9807	13.4236	13.4988	13.3321	14.0065	14.3367	14.9842	13.2695	13.1816	13.3356	13.9669	13.3248	12.8941	14.9544	14.6658	12.7299	0.294641	0.596713	0	2	1	4	3	4	3	4	4	5	3	3	3	4	3	3	5	5	2	3980.93	1135.61	16165.8	10987.7	11575.9	10312.2
Q8CGP0	16	2	H2bc26	Histone H2B type 3-B	20.2675	20.0668	21.5628	21.1415	20.9056	20.4243	17.7534	17.1837	17.5537	21.4778	21.6603	20.6303	20.5931	20.5533	21.3647	17.36	17.5898	18.2805	0.294506	0.718112	0	16	16	20	20	18	16	12	11	11	21	20	20	18	17	20	10	11	12	1.26221e+06	1.09825e+06	3.09769e+06	2.3132e+06	1964373	1.40714e+06
Q9D0S9	6	6	Hint2	Adenosine 5'-monophosphoramidase HINT2	15.2357	13.8783	15.5916	13.5383	15.4354	14.9217	15.4415	15.884	15.7784	16.07	14.4873	15.3718	15.3285	15.0209	14.9317	15.7381	15.4118	15.9947	0.294443	0.379317	0	4	3	5	3	5	3	4	5	5	6	3	5	5	4	4	4	5	5	38583.3	15059	49378.3	11897	44312.5	31037.3
O35730	6	4	Ring1	E3 ubiquitin-protein ligase RING1	12.97	14.5297	12.1002	15.5693	12.906	12.5568	15.9779	15.6007	16.2058	9.02768	14.6713	14.2223	14.4018	14.4895	14.3133	16.7846	15.606	17.5451	0.293896	0.764824	0	2	3	2	4	2	2	5	5	5	1	3	3	3	3	3	5	5	6	8023.28	23653.2	4390.58	48620.9	7675.07	6025.12
Q9EQ08	6	6	Sgsh	Heparan N-sulfatase	14.9212	15.0821	14.582	13.7689	13.8868	14.814	15.0929	15.6753	15.5358	14.7856	15.0602	14.7424	14.9673	14.9108	14.9304	15.4555	15.5637	15.5779	0.292776	0.248811	0	4	4	4	3	3	4	5	6	6	4	5	4	5	4	4	6	6	6	31026	34686.3	24525.8	13959.1	15147.7	28805.1
E9Q1Y3	4	4	Apob	Apolipoprotein B-100	12.8997	11.2762	12.4259	11.0948	12.7933	13.4345	15.5167	14.9126	15.3266	12.9643	12.6551	12.4765	11.108	12.5313	13.3407	15.8466	15.6121	15.7798	0.292672	0.717884	0	3	2	3	2	3	4	5	5	5	3	3	3	2	3	4	5	5	5	7641.58	2480.2	5502.73	2187.11	7098.67	11070.8
Q9CQ79	6	6	Txndc9	Thioredoxin domain-containing protein 9	14.8382	15.0662	14.8645	13.9282	14.3313	15.1349	15.0779	15.1289	16.0769	15.1777	15.1798	15.0528	15.3073	14.3123	14.8173	15.9859	15.8131	15.4311	0.292235	0.275277	0	5	5	5	4	4	5	5	6	6	5	5	6	5	4	5	6	6	6	29292.5	34306.2	29831	15588.5	20613.3	35980.2
Q8BIG7	8	8	Comtd1	Catechol O-methyltransferase domain-containing protein 1	15.5379	12.0058	15.7023	14.7185	15.2017	15.2322	14.1439	14.9097	14.4492	15.6761	14.5716	15.2493	15.3178	15.4465	15.5709	14.3603	14.2524	14.0819	0.291748	0.502401	0	7	3	8	5	6	7	5	5	6	7	6	7	8	7	7	7	6	5	47575.4	4112.47	53316.2	26959.5	37684.1	38488.9
Q8VHL1	4	4	Setd7	Histone-lysine N-methyltransferase SETD7	8.01959	11.9787	13.1802	11.4358	11.7899	13.3663	15.0515	14.48	14.4005	11.8448	12.1578	8.78689	12.3493	12.1154	12.2793	15.4397	15.5217	15.8286	0.291227	0.784365	0	1	2	3	2	2	3	4	4	4	2	2	1	2	2	2	4	4	4	259.5	4035.88	9282.14	2770.34	3540.82	10560.1
A0A0R4J293	6	6	Tgm1	Protein-glutamine gamma-glutamyltransferase K	15.8617	15.6264	15.7002	15.5775	15.1873	14.748	12.3026	13.5271	13.2636	14.9939	15.7845	15.9281	15.5043	15.5287	15.8069	14.2708	13.0508	13.5419	0.290609	0.60994	0	6	6	5	6	4	4	3	5	5	4	6	6	5	5	5	4	4	4	59546.1	50585.2	53240.8	48897.4	37310.3	27516.7
Q61823	10	10	Pdcd4	Programmed cell death protein 4	14.8047	15.2068	14.5617	11.6784	15.1618	15.0566	16.8262	16.3397	15.4178	13.7235	15.5639	14.9784	15.0778	15.3043	15.0517	15.2651	16.2049	16.4928	0.289855	0.60436	0	6	7	6	4	8	7	10	10	8	5	9	8	6	9	8	7	10	10	28619.8	37817.5	24183.6	3277.64	36658.1	34078
P55041	3	3	Gem	GTP-binding protein GEM	11.682	12.1269	11.5298	11.7642	13.5826	9.29384	14.7249	14.8906	16.3486	9.0785	10.146	11.8754	13.4058	13.7467	13.3843	16.4565	15.5577	14.901	0.289845	0.793529	0	2	2	2	2	3	1	4	4	4	1	1	2	3	3	3	4	4	4	3285.79	4472.5	2956.7	3478.26	12268.1	627.66
P59999	13	13	Arpc4	Actin-related protein 2/3 complex subunit 4	17.7222	16.6307	18.1472	18.6697	19.0656	19.0449	15.1085	16.8178	16.7877	18.5059	19.1635	18.1117	18.0922	18.2811	18.2494	17.3872	15.4355	17.3755	0.289744	0.615144	0	10	7	12	11	12	13	6	7	7	10	12	12	11	11	11	7	6	7	216226	101470	290307	417012	548663	540873
Q7TPD1	4	4	Fbxo11	F-box only protein 11	12.3491	11.9139	12.5919	12.7197	10.7111	13.1751	13.2287	12.8479	13.3141	13.2862	12.6186	12.691	12.9944	12.0862	11.4479	13.5496	13.362	13.4228	0.289679	0.431929	0	3	2	3	3	2	3	4	3	4	4	3	4	4	3	2	4	4	4	5217.35	3858.74	6173.81	6745.4	1676.33	9249.35
Q9Z266	5	5	Snapin	SNARE-associated protein Snapin	14.5737	14.7453	15.6237	14.7259	16.0476	16.0253	16.6666	16.5347	17.2855	15.8075	15.7353	15.5641	15.6595	15.6619	15.1463	16.4809	17.2821	17.4966	0.28955	0.500498	0	2	2	3	2	3	3	3	4	5	3	3	3	3	3	2	3	4	4	24384.9	27465.1	50488.6	27098.4	67734.6	66695.3
Q8R1S0	6	6	Coq6	Ubiquinone biosynthesis monooxygenase COQ6, mitochondrial	14.9404	14.657	14.2657	14.1385	14.8505	14.944	15.3071	15.0235	15.3048	14.7547	14.9147	15.4098	15.4112	14.8777	15.1378	15.3446	15.0032	15.1813	0.289277	0.0870892	0	5	4	3	3	5	5	5	4	5	4	5	6	6	5	5	5	5	5	31441.2	25834.9	19697.4	18034.7	29542.4	31520
Q3UJU9	7	7	Rmdn3	Regulator of microtubule dynamics protein 3	13.5367	11.8005	13.1465	13.2076	13.7412	13.169	13.8745	13.7315	13.1371	13.7016	12.0353	13.767	13.691	13.566	14.283	13.7298	13.4776	13.6952	0.289117	0.333722	0	5	3	4	4	6	4	7	5	5	5	3	6	6	4	6	6	6	7	11883.9	3566.89	9067.67	9459.92	13693	9210.15
Q9CZW4	15	14	Acsl3	Fatty acid CoA ligase Acsl3	15.7471	15.0614	16.9995	16.3814	16.5581	17.0725	18.2803	17.4693	16.908	16.5495	15.722	16.6703	16.6649	16.6027	16.7305	17.8611	17.9061	18.3701	0.288845	0.50309	0	8	7	12	9	9	13	15	15	13	9	8	10	12	9	12	15	16	16	54999.2	34193.1	131025	85369.6	96487.7	137830
Q921J2	3	3	Rheb	GTP-binding protein Rheb	14.1785	13.494	14.2461	14.0414	14.3187	14.4079	14.086	14.1308	14.1375	13.7885	14.3534	14.6292	14.546	14.763	14.9507	14.2082	14.3877	14.0137	0.288821	0.0715063	0	2	2	2	3	2	3	2	2	2	2	2	2	3	3	3	2	2	2	18541.9	11536.9	19431.8	16861.3	20434.9	21736.9
Q8BHT6	3	3	B3glct	Beta-1,3-glucosyltransferase	14.0544	10.8793	14.31	13.7279	14.6111	14.0716	14.7272	14.6659	14.5472	13.7773	14.249	14.3665	13.5943	14.457	14.328	14.4544	14.4967	14.4628	0.287919	0.497894	0	2	1	3	2	3	3	2	3	3	2	2	3	2	3	3	3	2	2	17013.7	1883.57	20310.9	13567.9	25025.5	17217.8
E9Q4C1	3	3	Klhl26	Kelch-like protein 26	11.9222	8.89017	11.9207	12.195	11.7467	12.4568	12.1811	12.4325	11.7502	12.095	11.9487	11.6398	12.0449	11.5561	12.0861	12.6547	12.1626	11.8973	0.287748	0.45982	0	2	1	2	2	2	3	3	3	2	2	2	2	2	2	2	3	3	2	3880.97	474.47	3876.95	4688.67	3436.43	5621.74
Q64523	13	2	H2ac20	Histone H2A type 2-C	21.8838	21.5192	21.8755	21.8143	21.9546	22.2469	17.0667	17.2533	16.5201	22.1242	22.0518	21.5641	22.0662	21.9405	21.7999	17.7372	17.0189	18.4061	0.286048	0.796652	0	15	16	15	16	16	17	10	10	9	15	15	14	17	16	14	11	10	12	3.86977e+06	3005500	3847476	3687657	4.0643e+06	4977093
P61804	3	3	Dad1	Dolichyl-diphosphooligosaccharide--protein glycosyltransferase subunit DAD1	14.1921	14.0199	15.5047	14.8302	15.0113	15.1819	17.1483	16.5926	16.7988	15.0326	14.1673	15.6634	14.6256	15.2247	15.3989	16.8599	17.1671	17.7134	0.285897	0.612617	0	2	2	3	3	3	3	3	3	3	2	2	3	2	3	3	3	3	3	18718	16611.5	46492.8	29130	33026.1	37171.1
Q9D1R9	11	11	Rpl34	60S ribosomal protein L34	20.1084	18.5465	20.8416	20.7772	20.7769	21.0241	14.8964	12.175	15.6726	20.4012	20.5299	19.1813	19.991	21.0837	20.8875	15.0416	13.926	16.3429	0.285151	0.843669	0	9	7	11	12	12	11	6	4	6	10	10	9	10	12	12	5	5	6	1.13043e+06	382875	1.87909e+06	1.79706e+06	1.79664e+06	2.13248e+06
P97304	5	4	Polr1d	DNA-directed RNA polymerases I and III subunit RPAC2	11.2179	11.4336	10.5979	10.8724	12.2856	10.8303	16.0053	15.3768	15.9271	10.8776	11.1352	12.6162	12.7395	10.8336	10.8858	16.1679	15.9532	15.9038	0.285099	0.800087	0	2	2	2	2	3	2	5	4	5	2	2	3	3	2	2	5	5	5	2381.94	2765.98	1549.82	1874.7	4992.72	1820.79
F8VPZ5	5	5	Ercc6	DNA excision repair protein ERCC-6	12.9551	9.54661	13.0986	12.9257	12.9533	13.1009	13.8224	13.4005	13.8646	13.1294	10.6833	13.2371	13.2558	12.9992	13.1085	13.9797	13.8053	14.0257	0.284056	0.609097	0	4	1	4	4	4	4	5	4	5	4	2	4	5	3	3	5	5	5	7941.08	747.85	8771.43	7780.74	7930.8	8785.51
P14483	3	3	H2-Ab1	H-2 class II histocompatibility antigen, A beta chain	16.5144	16.2913	15.361	15.9777	15.1677	15.7658	12.6481	13.3796	9.12808	15.6578	16.7311	15.6407	15.3242	15.4944	15.3624	10.9959	13.544	14.0378	0.28384	0.774996	0	3	3	3	3	3	3	2	2	0	3	3	3	2	2	2	1	2	2	93609.2	80198.7	42085.8	64532.1	36807.1	55715.2
Q9CWG8	8	8	Ndufaf7	Protein arginine methyltransferase NDUFAF7, mitochondrial	14.1382	11.5436	14.2672	14.1998	14.5418	14.1342	13.9924	13.9923	14.0988	14.4262	14.2756	14.1789	14.3946	14.339	14.4832	14.0216	13.8873	13.4434	0.282409	0.386239	0	6	3	7	5	6	5	5	5	5	7	6	6	6	5	5	4	5	4	18030.9	2985.09	19717.2	18818.1	23851	17980.8
H3BJB6	22	1	Cct8	T-complex protein 1 subunit theta	19.2439	18.7056	20.1582	19.6381	19.845	19.7122	20.7751	20.1791	20.4091	19.7492	19.5646	19.8064	19.8353	19.8368	19.9423	20.6879	20.6815	21.1026	0.282235	0.320274	0	16	17	21	20	22	20	20	18	19	19	19	19	20	21	22	20	21	20	620876	427515	1.1701e+06	815946	941750	858953
O70493	8	7	Snx12	Sorting nexin-12	16.5389	15.2168	16.0802	16.3066	16.9955	16.3661	17.1575	17.2273	17.1619	16.3374	17.013	16.3932	16.7057	16.6567	16.9521	16.5995	17.4652	17.456	0.280905	0.295899	0	6	4	5	5	9	6	7	7	7	5	7	5	6	7	8	5	7	7	95212.6	38080.2	69283.7	81055.1	130661	84466.7
J3QPR1	6	6	Atxn1	Ataxin-1	14.53	13.3255	14.2571	12.7655	14.5321	14.678	15.0076	14.8334	14.8846	13.392	14.6077	14.5368	15.0539	14.2957	14.1099	15.1667	15.0451	15.132	0.28065	0.396943	0	5	3	4	3	5	5	6	6	6	3	5	5	6	4	4	6	6	6	23656.8	10265.2	19580.8	6963.15	23691.6	26213.5
Q3TLR7	3	3	Dtl	Denticleless protein homolog	13.8009	13.5935	14.0295	13.9473	13.4553	13.7897	8.38694	12.6643	12.9607	14.1178	14.178	13.9814	14.0797	13.9543	13.5354	12.7632	12.414	10.1265	0.280244	0.709322	0	2	2	3	2	2	2	1	2	2	3	2	3	2	2	2	2	2	1	14272.4	12361.1	16721.9	15796.8	11231.4	14161.4
Q64525	20	1	Hist2h2bb	Histone H2B type 2-B	21.29	20.761	22.267	21.8357	21.686	21.4147	17.9979	17.2641	17.8001	22.0888	22.1703	21.2129	21.2865	21.5631	21.937	17.9156	17.6696	18.9934	0.280056	0.758878	0	21	20	26	26	24	21	16	15	14	26	25	26	24	23	26	15	16	18	2.5641e+06	1.77693e+06	5047126	3742720	3.37399e+06	2.79558e+06
Q9JMG2	5	5	C1galt1c1	C1GALT1-specific chaperone 1	13.4744	11.1584	13.7209	13.6909	11.279	14.1309	14.6202	14.6093	14.483	13.3178	11.3864	13.6451	13.9905	14.1364	13.8436	14.5349	14.571	14.2582	0.279654	0.618924	0	4	2	4	4	2	5	5	5	5	3	2	4	5	4	4	5	5	4	11381.5	2285.7	13502.4	13224	2485.02	17940.3
Q9ER00	5	5	Stx12	Syntaxin-12	14.7318	15.0379	15.3846	14.7028	11.3274	14.4939	15.526	15.6026	15.8186	13.9129	14.9067	14.5029	14.763	14.6464	14.743	16.0204	15.9602	15.6854	0.27948	0.592483	0	4	4	6	4	2	4	5	5	6	3	4	3	4	4	4	6	6	5	27208.9	33639.6	42778.4	26666.8	2569.77	23072.7
Q9EPK2	3	3	Rp2	Protein XRP2	13.628	12.0863	11.7665	11.931	14.6218	11.9742	14.8941	15.2074	15.0277	12.8172	12.7383	13.1834	13.3445	13.5456	13.6968	13.9736	15.092	15.2531	0.278612	0.641259	0	3	2	2	2	4	2	4	4	4	2	2	3	3	3	3	3	4	4	12660	4348.61	3483.84	3904.67	25211.4	4023.44
Q9QY66	4	4	Znhit2	Zinc finger HIT domain-containing protein 2	11.5283	11.7162	13.4183	11.3698	13.1914	13.8861	14.4847	14.0817	14.5179	13.2006	12.0485	13.0104	11.7734	11.9182	12.7393	15.3516	15.3477	15.3095	0.27831	0.679674	0	2	2	3	2	3	4	4	4	4	3	2	3	2	2	3	4	4	4	2953.7	3364.51	10947.3	2646.46	9354.32	15140
F7BP55	9	1	Ak2	Adenylate kinase 2 (Fragment)	18.708	16.808	18.7609	18.2885	18.3524	18.3356	16.9188	16.855	16.6381	18.5343	18.7609	18.4928	18.4689	18.5793	18.3454	16.6996	16.839	17.4443	0.277683	0.500376	0	8	5	8	8	8	8	6	6	6	8	9	9	8	8	8	6	6	6	428233	114742	444201	320180	334669	330801
A0A087WRA4	11	11	Mndal	Myeloid cell nuclear differentiation antigen-like protein	10.442	11.981	12.2943	11.9625	12.2783	13.5937	16.0842	15.7381	16.01	12.5254	12.0738	12.1681	12.5628	11.61	14.2308	16.1488	15.9415	15.6111	0.27647	0.769214	0	2	3	5	4	4	6	11	12	11	5	3	5	5	3	8	10	11	11	1391.13	4042.48	5022.84	3990.87	4967.51	12362.7
Q3UZ64	9	9	Nfatc3	Nuclear factor of activated T-cells c3 isoform IB-deltaXa	14.4879	11.2298	14.9706	14.8568	14.5	14.943	15.569	15.3927	15.5074	15.0098	14.4741	14.9834	15.0078	14.5416	14.2798	15.3024	15.2299	15.1154	0.276339	0.555093	0	6	3	8	6	6	7	9	9	9	6	6	8	7	6	6	8	9	8	22977.5	2401.7	32107.6	29671.8	23171	31498
P43274	22	10	H1-4	Histone H1.4	22.6999	21.3425	22.9634	22.5524	22.8422	22.6195	19.7602	19.5502	19.6491	22.7263	22.9937	22.3305	22.3578	22.761	22.6274	19.5066	20.063	21.0974	0.276029	0.680769	0	22	18	24	22	20	21	19	17	18	23	21	23	21	20	20	16	18	22	6813138	2659122	8.17856e+06	6.15107e+06	7.5194e+06	6444096
Q3UBX0	4	4	Tmem109	Transmembrane protein 109	12.979	12.9493	14.5875	14.1009	13.878	14.1905	15.9994	16.3411	16.0814	14.8809	13.4513	14.4398	13.3869	13.6393	13.866	16.4344	16.3003	17.1909	0.27587	0.676111	0	2	2	3	3	3	3	4	4	4	3	2	3	2	3	3	4	4	4	8073.44	7909.06	24618.7	17571.4	15055	18697
Q922Q1	15	15	Mtarc2	Mitochondrial amidoxime reducing component 2	17.1117	15.5714	17.1104	16.8975	16.8742	16.619	15.3742	15.4549	14.9719	17.3494	16.6333	17.2542	17.2346	16.6717	16.6943	15.1251	15.6342	15.8627	0.274922	0.489484	0	13	7	13	13	13	12	9	10	8	13	11	13	14	11	12	9	10	10	141626	48692.7	141495	122079	120128	100654
Q8BJ56	3	3	Pnpla2	Patatin-like phospholipase domain-containing protein 2	8.25148	8.44319	11.5078	7.88185	8.64071	8.41498	14.4077	14.1654	14.1343	9.34598	8.56148	12.8396	8.57815	8.47025	8.54249	13.9767	14.1371	13.8672	0.274626	0.836827	0	1	1	2	1	1	1	3	3	3	1	1	2	1	1	1	3	3	2	304.75	348.06	2911.96	235.87	399.13	341.32
Q8K199	3	3	Cmc2	COX assembly mitochondrial protein 2 homolog	15.1371	9.88885	14.6222	8.95187	13.5321	13.1187	16.0594	15.8954	16.1448	9.87137	13.8348	13.8843	10.6656	14.3834	14.4306	16.0973	16.2141	16.4261	0.27302	0.820118	0	3	1	3	1	2	2	4	4	4	1	2	2	1	2	2	3	4	4	36035.7	948.07	25218.4	495.2	11845.8	8894.78
Q9D0T1	9	9	Snu13	NHP2-like protein 1	18.816	18.4583	19.2657	18.6519	19.4273	19.0902	18.1512	17.6768	16.8751	19.1658	19.174	19.1887	19.2313	19.4655	19.173	17.4514	17.6541	18.3598	0.272365	0.472477	0	9	7	10	9	10	10	7	7	6	9	9	9	10	10	9	7	6	8	461507	360158	630313	411879	705024	558116
Q80ZS3	5	5	Mrps26	28S ribosomal protein S26, mitochondrial	14.4756	11.3699	15.5087	14.7965	15.4162	14.279	16.4821	16.1122	16.2414	14.9666	11.9865	15.316	15.0606	15.1345	15.2172	16.39	16.5313	16.5261	0.271918	0.700714	0	3	2	4	4	5	3	5	5	5	4	2	4	4	5	4	5	5	5	22782.5	2646.53	46619.7	28457.6	43725.4	19879.8
Q8K409	6	6	Polb	DNA polymerase beta	14.6806	13.5614	14.7128	14.3723	14.2943	14.3419	15.3616	14.8694	15.0927	15.2196	14.2758	15.0192	14.5562	13.6848	14.8347	15.3086	15.0777	15.7559	0.271731	0.32813	0	5	3	5	5	4	5	4	5	5	6	4	6	4	3	5	5	4	5	26260.6	12089.2	26852.2	21208.1	20091	20766.2
A0A0A6YX26	15	15	Rpl31	60S ribosomal protein L31	20.8693	19.9046	21.192	20.9069	21.2128	21.2529	13.2855	11.8224	14.7319	19.5017	21.0727	20.3579	20.5052	21.3326	21.0806	14.0576	12.9056	16.8094	0.271681	0.874065	0	15	14	15	15	15	15	7	6	9	12	15	15	14	15	15	7	7	9	1.91548e+06	981504	2395617	1.9661e+06	2.4305e+06	2.4989e+06
P29387	6	2	Gnb4	Guanine nucleotide-binding protein subunit beta-4	15.0243	14.12	15.314	15.3429	14.967	14.7691	16.2566	15.9213	16.0847	15.2348	14.5852	15.8629	15.4891	15.0384	14.4005	15.5431	16.5645	17.5258	0.271622	0.504923	0	4	3	4	5	5	4	5	5	5	4	3	5	5	4	3	4	5	5	33325.2	17805.6	40735	41559.1	32026	27922.1
Q8C3S2	7	7	Tango6	Transport and Golgi organization protein 6 homolog	14.0139	13.9484	14.1855	13.9296	13.4056	14.2565	14.8388	14.3166	14.4045	14.3397	14.1801	14.7398	14.2707	14.1298	14.553	14.7473	14.4772	14.3059	0.271556	0.0922071	0	4	4	4	4	3	5	5	4	5	6	4	6	5	4	6	6	6	5	16542.2	15808	18631.4	15603.4	10851.5	19572.5
Q3V3V9	18	1	Carmil2	Capping protein, Arp2/3 and myosin-I linker protein 2	14.6452	16.2954	16.5429	15.8651	16.1817	16.7994	16.8665	16.7648	16.8301	16.4097	16.4595	16.2944	16.5864	16.1418	16.5545	16.9336	16.8049	17.0481	0.271293	0.307995	0	9	11	17	11	11	16	14	15	15	15	15	16	17	13	17	15	16	15	25624.2	80430	95481.7	59686.4	74331.2	114061
P63268	35	1	Actg2	Actin, gamma-enteric smooth muscle	23.1985	22.1129	23.2611	22.8856	23.4605	23.6824	20.766	19.6229	20.3722	23.1826	23.5012	23.1012	22.9887	23.7086	23.5676	20.6141	20.1174	21.0224	0.271283	0.700037	0	41	37	41	41	42	42	30	26	27	39	42	42	39	43	44	32	28	34	9626076	4.53585e+06	10053041	7749211	11542942	13462218
Q3TYX3	11	11	Smyd5	Histone-lysine N-trimethyltransferase SMYD5	16.9649	14.5582	16.9727	16.8629	16.9159	16.5521	15.6553	15.1109	15.3387	16.8664	16.901	17.0874	16.4715	16.8855	17.0208	14.8331	15.6156	15.6913	0.271209	0.519842	0	9	4	9	7	9	9	8	7	8	8	9	8	6	9	10	7	8	10	127923	24124.9	128615	119189	123653	96090.3
Q8BTU1	8	8	Cfap20	Cilia- and flagella-associated protein 20	15.7891	15.4605	15.7446	15.6281	15.4616	15.7524	15.2461	15.1057	15.5317	15.5749	15.8677	15.9269	15.6879	15.6683	15.8815	15.9519	15.7928	15.8084	0.271149	0.00781041	0	6	6	6	6	7	6	6	6	8	6	6	7	7	6	7	7	7	8	56622	45089.4	54903.9	50643.9	45124.2	55202.5
Q8C6B9	8	8	Rps19bp1	Active regulator of SIRT1	16.6307	14.2351	17.2165	16.994	16.9698	16.9275	17.6177	17.4029	17.6482	15.9144	16.8509	17.0867	16.9228	16.7352	17.1346	17.7764	17.8274	17.8284	0.270485	0.512516	0	5	3	7	7	5	6	6	5	6	4	5	6	6	5	6	6	6	6	101469	19284.1	152290	130528	128358	124652
Q8VCD5	8	8	Med17	Mediator of RNA polymerase II transcription subunit 17	13.9246	14.0793	15.1459	14.8592	14.0814	14.8637	16.2434	15.26	15.8685	14.9286	15.2714	15.1111	14.7138	14.9954	14.8608	15.3442	15.3054	16.2252	0.270008	0.392206	0	4	4	6	5	4	5	8	7	8	5	6	6	5	6	5	7	7	7	15549.8	17309.8	36255.1	29720.2	17335.1	29813.4
Q91ZR1	12	4	Rab4b	Ras-related protein Rab-4B	16.044	14.7835	16.1944	15.9857	16.2508	16.2044	16.562	16.7252	16.6737	16.4025	16.099	16.079	16.1468	16.3089	16.2551	16.8222	16.8625	16.8711	0.269276	0.245325	0	8	6	8	7	10	9	10	11	11	10	8	9	10	10	9	11	11	11	67563.2	28202.3	74991.2	64891.6	77978.1	75509.8
Q06185	5	5	Atp5me	ATP synthase subunit e, mitochondrial	17.4834	17.1264	18.2532	17.126	18.06	17.9322	19.4106	18.8016	19.0898	17.9053	17.6366	18.0282	17.9875	17.977	18.1582	19.1705	19.233	19.6084	0.269022	0.472473	0	4	4	5	4	5	5	4	4	4	5	5	5	5	5	5	4	4	4	183243	143077	312446	143033	273270	250117
A2A472	3	2	Tox2	TOX high mobility group box family member 2	8.62176	8.77863	11.689	8.35652	8.97386	9.23926	12.0075	13.4333	13.6862	9.58721	9.60509	9.34405	9.50991	9.52537	9.72443	13.3965	13.6971	12.8155	0.268798	0.782658	0	0	0	2	0	0	1	2	3	3	1	0	1	1	0	1	3	3	2			3301.69			604.36
P83877	5	5	Txnl4a	Thioredoxin-like protein 4A	14.0457	13.8405	14.2364	14.4842	14.6253	14.7539	13.7325	13.2696	13.6471	14.5257	14.7874	14.5682	14.1507	14.7007	14.6167	13.7731	13.8793	14.0507	0.268626	0.214431	0	3	3	4	5	4	5	4	4	4	4	4	5	3	4	5	4	4	4	16911.1	14668.7	19300.8	22917.7	25273.4	27628.8
E9Q6B6	9	5	Mapk8ip3	C-Jun-amino-terminal kinase-interacting protein 4	15.8525	13.368	15.1694	15.3537	15.1906	14.9154	15.4368	15.45	14.9121	15.051	15.7194	15.8045	14.9531	15.8366	15.432	15.1653	14.9096	15.1919	0.268339	0.324979	0	7	4	7	6	6	6	8	9	7	6	6	9	5	8	7	7	6	8	59165.7	10572.6	36849.9	41872.3	37395.4	30900.7
Q3U3Q1	3	3	Ulk3	Serine/threonine-protein kinase ULK3	8.05593	8.9924	8.37994	8.27952	8.10166	11.8686	11.0224	11.7952	11.906	8.48434	9.60509	8.26195	11.3356	8.19628	9.38718	12.036	12.1302	11.378	0.268111	0.742963	0	1	1	1	1	1	2	2	3	3	1	0	1	2	1	0	3	3	2	266.12	509.31	333.13	310.73	274.69	3739.36
A0A0R4J1Y3	9	9	Osgep	tRNA N6-adenosine threonylcarbamoyltransferase	15.8797	15.7396	15.7842	15.8077	15.846	16.0883	16.009	15.677	14.7172	15.8593	15.998	16.2786	16.2571	16.0061	15.8888	15.5296	15.9316	16.2075	0.267529	0.1031	0	6	5	7	7	7	7	7	6	4	6	6	8	8	7	7	5	6	7	60292	54712.3	56432.9	57356.2	58900.4	69674.1
A0A140LHA5	5	5	Ucp2	Dicarboxylate carrier SLC25A8	14.0324	13.8736	11.4892	13.5907	11.8944	13.7066	12.5756	11.6566	11.3974	13.7301	12.7224	13.009	13.3922	13.2606	11.9948	8.63923	14.4971	15.3786	0.267508	0.719692	0	3	3	2	3	2	3	3	2	2	3	2	3	3	3	2	1	4	4	16756.6	15009.8	2874.65	12336.7	3806.79	13368.8
Q9D902	12	12	Gtf2e2	General transcription factor IIE subunit 2	15.7854	16.2268	16.0379	16.3326	16.1654	16.0394	13.4446	15.4102	15.6409	16.1831	16.0898	15.9592	16.232	16.4067	16.3139	15.6226	15.3327	15.3424	0.266591	0.425493	0	10	11	12	12	12	12	6	8	8	12	12	11	12	12	12	8	7	8	56477.7	76692.1	67281.9	82526.8	73495.1	67351.7
Q8K094	4	4	Pvr	Poliovirus receptor	14.7127	14.6811	14.405	14.8482	14.3209	12.2884	15.268	15.0887	15.1977	15.2324	13.9676	14.6303	14.1891	14.2139	14.4623	15.3263	15.3382	15.8361	0.265072	0.485515	0	3	3	3	4	3	2	4	4	4	4	3	3	3	3	3	4	4	4	26850.3	26268.9	21693.9	29495.2	20464.9	5002.4
O54785	7	7	Limk2	LIM domain kinase 2	15.7003	16.1865	15.9602	16.0173	15.428	15.9486	13.2611	10.7861	14.5747	15.771	16.0203	15.988	15.9803	16.0589	15.8202	13.0911	13.2009	14.3132	0.264568	0.721553	0	6	8	9	7	7	8	5	4	6	7	8	8	8	8	8	5	5	6	53242.2	74577.7	63754.6	66325.2	44085.5	63240.9
D3YZD8	5	5	Aamdc	Mth938 domain-containing protein	8.52595	14.1694	14.9287	14.468	14.4182	14.5304	15.0736	14.6201	14.8745	14.9242	9.78754	14.9923	14.4639	14.3577	14.2535	14.8903	15.2286	15.0881	0.264146	0.770099	0	1	3	5	4	5	5	4	4	4	5	2	5	4	5	4	4	4	4	368.61	18425	31188.8	22662	21893.8	23663.5
Q9CPW4	13	13	Arpc5	Actin-related protein 2/3 complex subunit 5	16.6726	16.2379	16.5448	16.1537	16.7163	16.8202	16.9379	16.5463	16.236	16.8131	16.7426	16.624	16.7573	16.6753	16.6881	16.9001	16.8321	17.2019	0.263194	0.0280794	0	10	10	12	9	13	13	10	9	7	13	10	12	13	12	13	8	8	12	104457	77283.1	95607.4	72901	107671	115711
F6VAN0	6	6	Atf6	Cyclic AMP-dependent transcription factor ATF-6 alpha	10.3523	9.05677	12.9656	8.12923	13.0232	10.7185	13.9471	14.2566	14.1805	10.6387	10.2974	10.623	10.5211	11.7937	11.813	14.4758	14.6403	14.1912	0.262708	0.793474	0	2	1	4	1	4	3	7	7	7	2	2	2	2	3	3	7	7	7	1307.26	532.55	7999.1	279.99	8324.69	1685
Q9CQY2	4	4	Ramac	RNA guanine-N7 methyltransferase activating subunit	14.7276	15.0347	15.3358	14.7005	14.9962	12.5332	16.5385	16.2454	16.0763	14.6878	14.483	15.2267	14.7848	14.6167	14.8243	16.4669	16.7333	16.7285	0.262621	0.613047	0	3	3	4	3	3	2	3	3	3	3	3	4	3	3	3	3	4	3	27130.1	33565.8	41356.8	26625.9	32681.5	5927.45
A0A2R8VK70	7	1	Cd47	Leukocyte surface antigen CD47	17.0036	15.9844	17.2825	17.0058	17.3963	17.4167	16.6792	16.2806	16.5637	17.1516	17.0497	17.028	17.0418	17.3864	17.4082	17.0685	16.9064	16.9287	0.261825	0.162069	0	5	4	7	6	6	6	5	4	5	6	6	6	6	6	6	5	5	5	131402	64829.2	159425	131603	172506	174964
P70280	6	6	Vamp7	Vesicle-associated membrane protein 7	13.917	9.76414	14.5298	13.8852	14.2599	14.6379	15.594	15.0692	15.9138	14.6729	10.8178	14.4874	14.436	13.9705	14.4813	15.9924	15.611	15.4354	0.259303	0.74431	0	4	1	5	4	5	6	5	6	6	5	2	6	5	4	6	6	6	6	15467.5	869.56	23654.9	15130.9	19617.5	25495.1
A0A1W2P6X9	16	16	Baz2a	Bromodomain adjacent to zinc finger domain protein 2A	14.857	15.2895	16.1727	15.8953	15.9088	14.9491	17.4856	16.5825	17.3309	15.9487	16.0302	16.0046	16.0185	15.9753	14.8316	17.364	17.2901	17.3421	0.259301	0.551469	0	7	8	11	9	11	8	13	10	14	9	10	11	11	11	7	13	14	14	29675.2	40049.4	73869.3	60950.4	61519.6	31632.6
A0A0N4SVH4	6	1	Arhgdib	Rho, GDP dissociation inhibitor (GDI) beta (Fragment)	16.8926	16.7232	17.2001	17.1086	16.9391	17.2607	14.7299	15.6986	15.9625	17.2625	17.2706	17.1186	16.8452	16.6205	17.1709	16.4991	15.9701	16.0809	0.258135	0.446921	0	5	5	6	6	5	5	3	4	5	6	5	5	5	4	5	5	4	5	121670	108188	150572	141315	125657	157032
P61327	12	12	Magoh	Protein mago nashi homolog	18.7279	18.4186	18.6431	18.608	18.5056	18.9147	18.584	17.7488	18.2177	18.5905	18.9115	18.7931	18.5944	18.7669	18.9182	18.5548	18.7591	18.8017	0.257986	0.0492518	0	13	12	14	14	12	14	9	9	9	13	14	14	13	14	15	9	9	10	434169	350386	409387	399559	372170	494181
Q8VDU0	5	4	Gpsm2	G-protein-signaling modulator 2	11.7263	14.4993	13.7687	11.0296	11.6042	13.9932	13.6581	14.1177	14.5317	14.641	12.401	14.738	8.867	14.0948	12.5633	14.5107	14.447	14.9858	0.257747	0.750625	0	2	3	3	2	2	3	3	4	5	4	2	4	1	3	2	4	4	4	3388.25	23158.6	13957.5	2090.41	3113.28	16307.1
P04235	6	6	Cd3d	T-cell surface glycoprotein CD3 delta chain	16.6939	15.7984	16.9742	16.5962	15.9392	16.7463	18.0329	17.5184	17.611	17.0479	16.4924	16.8849	16.4616	16.5948	16.6268	17.7696	17.9984	18.3506	0.257401	0.46671	0	6	4	6	6	4	6	6	5	5	6	6	6	5	5	4	5	5	5	106015	56989.3	128753	99073.3	62832.5	109933
D3YW97	3	3	Ufm1	Ubiquitin-fold modifier 1	14.6905	14.178	14.5228	14.3952	15.0944	15.2752	15.9212	15.1612	15.4538	14.3443	15.2189	14.683	14.6549	15.3092	15.0874	15.7924	15.7421	16.1741	0.257117	0.363061	0	2	2	2	2	2	2	2	2	2	2	2	2	2	2	2	2	2	3	26440.5	18534.9	23539.9	21547.6	34983.3	39653.6
Q8C3X8	13	13	Lmf2	Lipase maturation factor 2	17.4351	15.8639	17.3147	17.1154	17.3783	17.4293	17.2079	17.1955	16.8112	17.0902	17.3731	17.5448	17.2798	17.5039	17.4897	17.0578	17.2577	17.4611	0.256308	0.164956	0	10	6	10	9	10	11	9	10	9	9	9	10	10	11	9	9	10	12	177208	59634.6	163023	141990	170367	176502
Q9D0M0	11	11	Exosc7	Exosome complex exonuclease RRP42	16.6829	15.6865	16.1588	16.089	16.1911	15.6743	14.6445	14.9401	13.9629	16.2824	16.4918	16.3378	16.4997	16.0734	15.7558	14.8164	15.2833	14.7947	0.256127	0.499845	0	12	10	12	12	12	10	8	9	7	11	12	12	12	12	11	8	10	8	105207	52735.1	73163.8	69707.3	74820.2	52291.6
Q9CR70	4	4	Lage3	EKC/KEOPS complex subunit Lage3	14.7554	14.2532	14.9582	14.8667	14.8038	15.0356	14.8073	14.3758	14.6063	14.8255	15.2933	14.9077	14.9802	15.0552	14.8166	14.8207	14.848	15.2191	0.256009	0.0274984	0	3	3	4	3	4	4	3	3	3	3	4	3	4	4	3	3	3	3	27657.8	19527.8	31831.3	29876.1	28601.7	33585.6
A2A8W8	5	5	Mknk1	MAP kinase-interacting serine/threonine-protein kinase 1	10.7167	9.58937	14.2583	13.8514	13.918	13.8526	14.1797	14.2076	14.3114	14.1021	9.806	13.7894	13.7042	14.0782	13.5168	14.1334	14.0745	13.9821	0.255734	0.736993	0	2	1	5	3	4	3	5	4	4	4	1	4	3	4	3	4	4	4	1682.86	770.35	19597	14780.5	15478.3	14793.1
Q6PHZ5	7	6	Rbm15b	Putative RNA-binding protein 15B	15.3427	14.6278	14.0016	14.0386	15.324	14.0867	16.8533	15.6469	16.2929	14.9363	13.5094	14.1723	15.4305	15.0975	14.2578	16.6401	17.0754	17.3964	0.255689	0.660481	0	4	3	3	3	4	3	7	5	6	4	2	3	4	4	3	5	7	7	41554.7	25316.7	16402.4	16827.9	41019.9	17399
Q8CI71	12	12	Vps50	Syndetin	13.8872	13.8629	15.0402	14.9917	14.8208	13.6776	15.8541	16.0047	15.7862	14.7527	14.7632	14.741	14.8699	15.0554	14.9919	15.8918	15.3535	15.8073	0.255679	0.458388	0	6	6	10	9	8	6	11	11	11	8	8	8	9	9	9	11	10	11	15151.8	14898.4	33694.6	32580.5	28939.7	13103.2
Q8BFU3	5	5	Rnf214	RING finger protein 214	14.165	14.2644	12.6191	14.4988	14.6707	12.7873	15.5358	15.5177	15.3192	13.9525	14.2053	14.8211	13.314	14.3445	14.1388	15.5438	15.6861	15.6685	0.255187	0.584676	0	4	3	3	4	5	3	5	5	5	3	4	5	3	4	4	5	5	5	18369.2	19679.8	6291.04	23151.4	26080.3	7068.89
E9Q8D0	6	6	Dnajc21	DnaJ homolog subfamily C member 21	16.253	16.3927	15.5396	15.9405	16.1277	16.3307	14.5275	15.0605	13.6942	16.3391	16.3608	15.815	16.2881	16.3658	16.415	14.661	14.9698	14.9459	0.254896	0.52883	0	6	6	5	5	6	6	4	4	3	6	6	5	6	6	6	3	4	4	78096.4	86041.2	47630.6	62890.2	71603.7	82419.7
Q80VP0	12	12	Tecpr1	Tectonin beta-propeller repeat-containing protein 1	16.0468	16.1891	16.1139	16.2139	14.3624	15.793	16.8327	16.4453	16.4198	16.3605	15.8945	16.1468	16.1498	15.8353	15.9807	16.5703	16.8474	16.9242	0.254745	0.355647	0	8	8	11	9	6	7	12	13	13	12	9	11	11	9	10	12	12	13	67698.9	74714	70920.4	76011.5	21063.1	56775.8
Q99KR8	7	7	Fuca2	Plasma alpha-L-fucosidase	14.1265	11.9132	14.3248	13.9761	13.7922	13.819	15.026	14.6196	14.52	14.0435	14.0797	14.107	14.2078	14.2716	14.2984	14.1246	14.7082	14.5677	0.254553	0.415579	0	6	3	7	6	5	5	7	7	7	6	5	6	6	6	7	5	8	7	17886.1	3856.89	20521.3	16114.3	14186.2	14452.5
Q14DI0	3	3	Gm49359	Zinc finger protein 935	12.778	13.5316	12.9592	13.4886	12.9209	13.2873	12.228	11.9643	12.001	12.8725	13.5615	12.9296	13.4797	12.9848	13.2308	12.8256	12.783	12.774	0.25365	0.278331	0	2	3	2	3	3	2	3	2	3	2	3	2	3	2	3	3	3	3	7023.81	11841.7	7963.52	11493.9	7754.71	9997.23
D6REV1	7	7	Asxl2	Putative Polycomb group protein ASXL2	13.536	10.7079	13.1114	11.2132	11.6745	13.3995	14.7014	14.2587	14.5923	11.1518	12.1173	14.4305	13.2831	11.6945	13.3236	14.094	14.7219	14.6597	0.25352	0.708904	0	4	2	4	3	3	4	6	5	6	3	3	5	4	3	4	5	6	6	11877.9	1672.58	8849.73	2374.19	3268.76	10805.4
D3Z7F1	9	9	Cyp2s1	Cytochrome P450 2S1	17.3658	17.1247	16.6494	16.7445	16.6214	16.8066	12.5228	8.9618	10.2361	16.921	17.264	16.9273	16.932	16.6835	16.9335	9.77563	8.63905	15.2377	0.253392	0.873729	0	10	10	9	10	10	10	5	3	3	9	10	10	9	10	9	2	2	7	168896	142904	102796	109796	100821	114631
P10126	39	19	Eef1a1	Elongation factor 1-alpha 1	24.0056	23.3997	24.1607	23.6384	23.9619	23.876	20.8969	21.5203	21.0327	23.6498	23.8364	23.854	23.8493	24.0919	23.9255	21.8407	21.5301	22.1896	0.252793	0.664118	0	40	37	44	41	42	40	29	32	30	39	40	41	41	41	42	32	32	35	16842734	11066716	18754666	13057508	16340349	15395355
E9Q296	10	10	Acox3	Peroxisomal acyl-coenzyme A oxidase 3	16.4349	16.0766	16.388	16.2516	16.2908	16.1412	16.3522	15.9454	14.3243	16.5598	16.3189	16.4989	16.4633	16.5795	16.4642	15.8489	15.7122	16.0334	0.252669	0.316408	0	10	7	10	8	10	9	9	8	5	10	9	10	10	11	10	10	8	10	88590.3	69110.6	85759.3	78022.3	80174.1	72274
D3YWJ5	5	5	Tnfaip8	Tumor necrosis factor alpha-induced protein 8	15.6409	15.1173	16.0096	15.3141	15.5996	15.8129	15.6623	15.6043	15.7521	15.5202	15.6013	15.4877	15.7874	15.3545	15.6375	16.1912	16.5994	16.6018	0.252012	0.185846	0	3	3	4	4	3	4	5	4	4	4	3	3	4	3	4	5	5	5	51095.3	35544.1	65971.7	40738	49651.9	57564
Q6ZWM4	6	6	Lsm8	U6 snRNA-associated Sm-like protein LSm8	15.3054	15.8144	16.2247	16.0188	15.5682	16.1135	16.9775	16.3492	17.4721	15.9164	15.8894	16.5902	16.0738	15.3382	15.9611	17.3226	17.7733	17.2228	0.249348	0.490285	0	4	4	5	5	4	5	6	5	7	5	5	6	5	4	5	7	7	6	40493.6	57623.3	76579.5	66397.2	48582.7	70900.3
Q6PGG6	7	7	Gnl3l	Guanine nucleotide-binding protein-like 3-like protein	14.4065	14.8085	13.9289	12.1613	12.5126	13.657	14.7701	14.4897	15.1456	13.5445	14.0839	13.9159	13.903	14.1334	13.5267	15.2566	15.0589	14.7013	0.249346	0.547313	0	6	5	6	3	3	4	6	7	7	4	4	5	5	5	4	7	6	7	21716.5	28694.6	15596.1	4580.41	5843.62	12916.8
Q9CR68	10	10	Uqcrfs1	Cytochrome b-c1 complex subunit Rieske, mitochondrial	17.1923	16.7445	17.9122	17.1746	17.6123	17.4005	18.3226	18.1962	18.0604	17.5379	17.9228	17.9154	17.2413	17.7943	17.932	18.1489	18.447	17.9199	0.249301	0.256681	0	7	5	8	6	7	8	9	8	7	7	8	9	6	8	8	7	9	8	149760	109796	246674	147935	200371	173008
H7BXC3	17	1	Tpi1	Triosephosphate isomerase	21.0649	21.0301	20.7829	20.9805	20.7515	20.9445	19.9923	18.1768	19.9409	20.9715	21.0111	20.7217	21.0376	21.1093	20.9391	20.0357	19.8587	20.2224	0.249199	0.489407	0	25	25	23	25	24	24	17	14	16	25	24	22	25	25	24	18	15	19	2193573	2141346	1.80421e+06	2069012	1.76532e+06	2.01796e+06
Q9CXJ4	9	9	Abcb8	Mitochondrial potassium channel ATP-binding subunit	13.1469	13.4147	15.2426	14.7023	15.1157	15.1967	15.6015	15.2751	15.1369	14.7777	14.4974	14.9655	14.9783	15.0342	15.0098	15.1027	14.9736	15.7333	0.248884	0.434311	0	4	4	7	5	7	8	7	7	7	5	5	5	7	7	7	7	7	9	9070.06	10920.5	38767.3	26658.5	35504.7	37554.3
Q2TPA8	10	10	Hsdl2	Hydroxysteroid dehydrogenase-like protein 2	15.4901	14.0012	15.5722	15.5707	15.4351	15.48	16.6531	16.0857	16.2613	15.9466	16.1805	15.6465	15.4635	15.3449	15.3758	16.0248	16.357	16.4487	0.248766	0.394722	0	6	4	7	7	7	6	8	6	7	8	8	7	7	6	7	7	8	6	46024.4	16397.1	48719.7	48667.5	44301.1	45701.8
Q9ES97	5	5	Rtn3	Reticulon-3	17.6701	16.5193	18.1092	17.6111	17.4216	18.1246	17.8745	17.8461	17.8314	17.616	17.8716	17.7672	17.617	17.9101	17.9316	18.2901	18.0577	18.1833	0.248535	0.185458	0	5	4	6	6	5	6	5	5	5	6	5	6	5	5	6	5	5	5	208564	93928	282750	200197	175558	285788
A0A0B4J1E5	6	4	Uck2	Uridine-cytidine kinase 2	15.0921	14.9815	15.0666	13.6585	15.2248	15.2824	15.9826	15.6139	16.1805	15.1943	14.3546	14.9689	15.0801	15.1966	15.7319	16.3081	16.2869	16.198	0.248512	0.465739	0	5	5	6	4	6	5	7	7	7	6	4	6	6	5	8	7	7	7	34927.1	32350.4	34315.1	12930.3	38294.4	39853.4
A0A1B0GR85	3	3	2900026A02Rik	RIKEN cDNA 2900026A02 gene	8.62176	8.77863	8.30366	9.08257	8.97386	9.03925	15.0666	15.0604	15.4535	9.08562	9.51924	7.52042	13.4585	9.75475	9.38718	14.3364	14.0285	13.524	0.248273	0.859346	0	0	0	0	1	0	1	3	3	3	0	1	1	2	1	0	2	2	2				542.16		526.12
Q9CZY3	13	1	Ube2v1	Ubiquitin-conjugating enzyme E2 variant 1	19.7222	18.5988	19.3942	19.0092	19.4306	19.2466	18.3472	18.1833	17.9838	19.3411	19.626	19.4527	19.3438	19.4587	19.4777	18.1721	18.3711	18.8916	0.246525	0.376982	0	12	10	13	12	12	12	10	8	8	12	11	13	12	13	13	9	9	10	864894	397018	689025	527631	706643	622002
Q8R4E9	3	3	Cdt1	DNA replication factor Cdt1	10.0185	10.2384	14.1858	13.4234	13.2419	9.80033	12.9065	14.3158	13.6883	13.6063	11.0436	10.4207	13.5178	10.5921	10.7103	14.6673	14.9544	14.5251	0.246513	0.786621	0	1	1	3	2	2	1	2	3	2	2	1	1	2	1	1	3	3	3	1037.18	1208.02	18635.9	10986.3	9687.72	891.65
Q8BSL7	12	3	Arf2	ADP-ribosylation factor 1	17.9783	17.811	18.9855	18.337	18.2913	18.4763	19.2938	18.9608	19.0747	18.6142	18.1768	18.6386	18.7042	18.363	18.4921	19.4151	19.4404	19.5802	0.246222	0.328983	0	8	8	10	10	9	12	11	9	10	10	8	11	10	11	9	10	10	10	258226	229956	519059	331123	320801	364682
Q9D9Z5	5	5	Dda1	DET1- and DDB1-associated protein 1	15.6453	15.5074	15.5741	15.5891	16.0371	15.6235	14.6451	14.5048	14.9927	15.4914	16.5156	15.3518	15.6173	15.6061	16.4806	15.1378	15.1086	15.0239	0.245995	0.343858	0	5	4	5	5	6	5	3	3	4	4	5	5	5	5	6	3	4	4	51250.8	46578.8	48783.7	49292.2	67242.6	50483.1
O70480	4	4	Vamp4	Vesicle-associated membrane protein 4	15.1105	15.8603	14.8931	14.0723	14.8533	14.8102	13.6859	14.7046	14.8141	15.4013	16.0687	14.8351	15.0574	14.8617	14.8003	14.9672	14.3024	14.7189	0.245394	0.363442	0	3	4	3	2	3	3	2	3	3	4	4	3	3	3	3	3	2	3	35376.4	59486.4	30428.7	17226.1	29599.7	28729.5
A0A2R8VH97	4	1	Eif3l	Eukaryotic translation initiation factor 3 subunit L	17.0439	17.0561	17.4483	17.1697	17.2161	17.1819	16.6748	17.5208	17.7943	16.9596	17.0083	17.28	17.5424	17.5715	17.5364	17.7708	17.7993	17.8414	0.244871	0.130132	0	3	3	3	3	4	4	2	3	3	3	3	3	4	4	4	3	3	3	135118	136270	178841	147431	152255	148682
P45591	10	2	Cfl2	Cofilin-2	19.5244	17.7079	18.9525	18.4729	19.3848	20.3428	14.9623	15.5019	16.3983	18.7577	19.9546	18.5953	18.5855	19.8767	19.8218	16.5975	14.8531	16.4085	0.244769	0.783059	0	10	8	9	9	9	11	6	7	8	9	10	9	9	10	11	7	6	7	754110	214094	507310	363832	684552	1.32979e+06
P42669	10	7	Pura	Transcriptional activator protein Pur-alpha	18.2581	17.8526	18.0715	18.3369	18.4718	18.2649	17.7122	17.9868	16.0342	18.1758	18.6987	18.3996	18.2618	18.3684	18.6459	17.3465	17.5306	17.7539	0.243572	0.418236	0	9	8	9	9	10	9	6	6	5	9	10	10	9	9	10	5	6	6	313505	236688	275473	331091	363547	314972
Q9JJG9	6	6	Noa1	Nitric oxide-associated protein 1	11.4952	14.0335	14.8078	14.2201	15.3369	15.5457	15.4615	14.959	15.3789	14.5258	15.0239	14.8507	14.8872	15.0429	15.111	14.7853	14.464	14.7389	0.24344	0.581251	0	2	3	4	3	4	6	6	5	6	3	4	4	4	4	4	5	5	5	2886.76	16769.1	28680.5	19084	41388.6	47833.5
Q8CG72	8	8	Adprs	ADP-ribosylhydrolase ARH3	15.6621	15.0232	16.1729	15.752	16.1864	15.7263	16.3475	15.8991	16.0474	15.9635	15.8472	16.2387	15.8576	15.9168	16.0833	16.2242	16.2255	16.6496	0.243278	0.140671	0	8	6	9	9	9	8	8	8	8	9	9	9	7	8	8	8	7	7	51850.6	33298.3	73877.7	55185	74576.7	54212.9
E0CXA9	7	7	Mob4	MOB-like protein phocein	15.5206	16.6303	16.7296	16.3754	16.3878	17.0796	15.1278	15.4966	15.4935	16.2745	16.3332	16.6925	16.2011	16.2652	16.1851	16.4238	16.212	16.4422	0.243164	0.318723	0	4	6	7	5	6	6	4	5	5	5	5	7	5	5	5	5	5	5	47006.3	101446	108672	85014.6	85745.4	138510
P60867	11	11	Rps20	40S ribosomal protein S20	21.3173	20.5579	21.1176	21.2491	21.4761	21.3321	17.8889	18.3018	17.0344	21.2278	21.1045	20.8338	21.2528	21.4343	21.4383	18.1996	18.863	18.1061	0.242782	0.753278	0	15	13	15	15	15	14	9	9	8	15	14	14	15	15	15	9	10	9	2.61313e+06	1.54364e+06	2.27532e+06	2.49239e+06	2917100	2.63997e+06
Q9JHI2	4	4	Adat1	tRNA-specific adenosine deaminase 1	13.2642	11.3434	14.0156	13.1262	13.9956	13.6566	13.1206	13.1111	13.5945	13.3494	12.0253	13.9514	13.6858	13.4618	14.0447	13.7943	13.4296	13.6702	0.242737	0.476097	0	3	2	4	3	4	4	3	3	3	3	2	4	3	3	4	3	4	3	9838.01	2598.32	16562.7	8940.61	16334.2	12913.9
Q6GV12	5	5	Kdsr	3-ketodihydrosphingosine reductase	14.7103	13.8657	14.9132	14.2995	14.2954	14.4351	13.5772	13.4652	14.0534	14.5751	14.7766	15.4739	14.4795	14.4195	14.3768	13.8418	13.998	13.8563	0.242514	0.318714	0	5	3	5	4	5	5	4	3	4	5	5	6	4	4	5	4	4	5	26806.1	14927.7	30854.8	20163.5	20106.6	22151
Q9R1P4	19	19	Psma1	Proteasome subunit alpha type-1	19.4687	19.048	19.9299	19.6007	19.5187	19.7937	19.6569	19.2347	18.9616	19.7809	20.0196	19.6438	19.6642	19.8035	19.8848	19.4459	19.3042	19.8392	0.241491	0.0866896	0	17	14	20	20	18	18	15	14	13	19	20	17	19	18	19	14	14	16	725565	542013	998827	795072	751124	908888
Q62178	11	11	Sema4a	Semaphorin-4A	12.0824	13.1222	14.1182	12.7272	11.4629	16.0065	17.2157	17.3201	17.6572	12.6524	14.4379	13.5762	14.8132	14.4092	13.9272	17.5166	16.9319	15.62	0.241359	0.806122	0	3	4	6	4	3	8	10	10	10	4	6	5	7	5	5	10	11	8	4336.69	8916.33	17782.9	6780.41	2822.78	65831.6
Q3UU43	6	6	Chpf2	Hexosyltransferase	9.92877	8.77863	8.30366	8.35652	9.69817	8.91666	15.3618	14.9802	14.7422	9.11899	9.62983	9.06026	9.70922	9.19382	9.65123	15.4998	14.7122	14.6547	0.240382	0.864335	0	1	0	0	0	1	1	5	5	6	1	1	1	1	1	1	5	5	6	974.67				830.69	483.26
Q3UKG7	5	5	Tfeb	Transcription factor EB	9.59671	12.1663	14.2314	12.0895	9.97131	12.8687	16.473	15.4101	15.6275	11.4539	12.969	13.6974	10.1511	10.0896	13.4072	16.131	16.334	16.3642	0.240331	0.840022	0	1	2	4	2	1	3	6	5	5	2	2	3	1	1	3	6	6	6	774.28	4596.31	19234.3	4358.27	1003.84	7479.29
Q8BMK4	6	6	Ckap4	Cytoskeleton-associated protein 4	15.1589	15.3944	15.2327	15.1673	14.9732	14.7054	14.3698	14.3712	12.5798	15.069	15.2539	15.1726	14.8412	14.8662	15.0875	14.48	14.5013	14.8435	0.240261	0.438204	0	5	5	6	5	5	5	5	5	3	5	5	5	5	5	5	6	6	6	36583	43070.1	38502.4	36797.5	32165.2	26716.4
A0A140LHL5	8	8	Sirt2	NAD-dependent protein deacetylase sirtuin-2	15.3648	15.6133	15.4399	15.5631	15.3738	15.5597	15.0864	14.2676	15.1967	15.9512	16.0633	15.4461	15.4256	15.4902	15.3377	15.1607	15.2283	15.5239	0.240206	0.181001	0	6	7	7	7	7	7	6	4	7	8	9	6	7	7	7	6	7	6	42196.1	50127.7	44449.8	48414.4	42458.6	48297.9
Q9DB73	9	9	Cyb5r1	NADH-cytochrome b5 reductase 1	15.4913	15.2337	15.9305	15.5579	16.7273	15.6472	16.23	16.1067	15.9933	15.7805	16.3601	15.9818	16.0323	16.3619	16.3587	16.3599	15.957	15.8872	0.240174	0.177522	0	5	6	7	6	9	6	8	8	7	6	9	9	8	9	9	8	8	7	46063.8	38528.8	62452.3	48237.8	108496	51319.4
A0A087WRZ7	4	4	Myl1	Myosin light chain 3	16.9617	13.2563	17.3742	17.0073	17.4405	16.5786	17.7306	16.9246	16.9191	17.5221	15.5093	17.1754	17.0376	17.5173	16.1813	16.4058	17.1012	17.9027	0.239983	0.644905	0	5	2	5	4	4	3	3	3	3	5	3	4	4	5	3	3	3	4	127636	9784.74	169886	131734	177872	97869.9
A3KGV1	4	4	Odf2	Outer dense fiber protein 2	14.6491	14.7318	14.2184	14.4777	14.2597	14.0677	13.5024	10.8292	14.0383	14.8904	14.9186	14.6543	14.902	14.5923	14.162	13.1825	12.6916	12.9397	0.239896	0.638826	0	3	3	4	4	4	4	4	2	4	3	4	4	4	4	4	3	2	2	25693.5	27208.7	19062.3	22815.4	19614.9	17171.1
E9PWI8	5	5	Ets1	Protein C-ets-1	15.5722	14.3609	15.5306	15.4284	15.4378	15.3501	15.815	15.5788	15.3865	15.7745	15.5553	15.7453	15.543	15.1955	15.2716	15.5912	15.9395	16.001	0.239619	0.162949	0	5	3	6	5	5	4	4	4	4	6	4	6	5	5	5	4	4	4	48720.3	21040.7	47335	44096.3	44384.6	41768.7
P28474	11	11	Adh5	Alcohol dehydrogenase class-3	17.1756	16.7334	17.4707	17.1182	17.1116	17.3285	17.7541	17.0275	17.3548	17.183	17.2806	17.5103	17.326	17.335	17.3998	17.633	17.6133	17.9499	0.239588	0.0723025	0	9	7	9	9	10	9	9	8	9	9	9	9	9	9	9	9	9	9	148040	108956	181641	142262	141618	164591
Q8BGT5	7	7	Gpt2	Alanine aminotransferase 2	16.2823	14.3287	16.503	16.7395	16.8093	16.2136	16.064	16.2525	15.3226	16.2919	16.1376	16.6397	16.0798	16.5733	16.603	16.0547	15.8336	16.456	0.23933	0.400548	0	5	3	5	6	6	6	7	7	5	5	5	6	5	6	6	6	6	7	79702.4	20576.9	92874.8	109417	114844	75992.9
Q8VC65	5	5	Nrm	Nurim	15.862	16.0454	16.2463	15.6751	15.3426	15.8065	16.8612	16.1637	16.1237	16.0998	15.7944	16.0677	15.7377	15.597	15.9855	16.5249	17.0018	17.4712	0.239247	0.357602	0	5	4	5	4	4	5	5	5	5	4	5	5	5	4	5	5	5	5	59559.7	67632.9	77738.4	52319.2	41552.2	57310.6
D6RFU9	4	4	Sypl	Synaptophysin-like protein	15.9847	15.3152	15.9069	15.8543	15.8522	15.9721	14.0966	14.7022	14.46	16.1678	15.9021	16.1015	15.8963	16.0387	16.0566	14.4282	14.9251	14.778	0.238912	0.485145	0	4	3	4	4	4	4	3	3	3	4	4	4	4	4	4	4	4	4	64845.5	40769.6	61439.5	59240.3	59153.7	64279.7
Q8R0L9	4	4	Tada3	Transcriptional adapter 3	13.4747	9.1763	14.0379	13.7366	13.5298	13.7379	14.3963	12.7372	14.7989	13.0994	12.2559	13.776	13.7412	13.6132	13.524	14.0508	13.7907	13.9218	0.238593	0.686093	0	3	1	4	3	3	3	4	2	4	2	2	3	3	3	3	3	3	3	11383.7	578.55	16819.7	13649.8	11827.3	13662.3
Q9CW79	6	6	Golga1	Golgin subfamily A member 1	8.51001	11.2271	13.6854	14.0798	11.2459	11.031	15.202	14.4354	15.2178	13.4493	9.2227	12.5582	11.5097	11.7749	11.5391	15.6693	15.4078	15.6442	0.23788	0.828001	0	1	2	4	4	2	2	6	4	6	3	1	3	2	2	2	6	6	6	364.56	2397.08	13173.7	17316.4	2428.54	2092.42
D3Z4U9	3	3	Irf7	Interferon regulatory factor 7	13.1029	13.8307	13.6349	13.2093	9.60968	13.6296	15.0106	14.7131	14.0723	13.6748	13.3911	13.0143	13.3752	13.2419	12.5456	14.4587	14.6448	14.5951	0.236505	0.687622	0	2	3	3	2	1	2	3	3	3	3	2	2	2	2	2	3	3	3	8797.36	14569.6	12721.1	9470.92	781.27	12674.2
Q8CCM6	4	4	Timm21	Mitochondrial import inner membrane translocase subunit Tim21	14.3211	13.8341	14.4082	14.2468	14.8589	14.8792	11.5215	11.7105	11.411	15.2604	14.6117	14.6584	14.3864	15.5237	14.7907	11.2281	11.437	11.422	0.236347	0.763623	0	3	3	3	3	3	3	2	2	2	4	3	3	3	4	3	2	2	2	20467.8	14604.4	21741.7	19440.8	29715.9	30136.9
Q5SXC4	6	4	Vezf1	Vascular endothelial zinc finger 1	17.8834	17.7402	17.9418	17.6834	17.6715	17.5853	13.3754	15.8148	15.8472	18.0305	17.8299	17.941	17.8897	17.7381	17.7256	15.6218	15.5989	15.2944	0.236312	0.72056	0	6	4	6	5	5	5	3	4	4	5	5	5	5	5	5	4	4	3	241787	218939	251780	210486	208764	196653
Q91YR9	7	7	Ptgr1	Prostaglandin reductase 1	14.3488	14.3682	14.4139	12.0155	14.4261	14.7949	14.4787	14.1577	13.7175	14.4907	14.3733	14.4621	14.6252	14.4911	14.2058	13.6974	14.2329	14.2683	0.236177	0.426866	0	5	4	7	3	6	7	6	6	5	6	5	6	6	6	5	5	6	6	20865.6	21148.2	21827.5	4140.16	22013.1	28425.5
Q91YP0	4	4	L2hgdh	L-2-hydroxyglutarate dehydrogenase, mitochondrial	14.2254	14.2397	14.6312	13.1071	14.6048	13.9439	15.1385	14.3335	14.7729	14.5339	14.4606	14.381	14.7035	14.4218	14.8477	14.8868	14.4367	14.4501	0.236129	0.262639	0	3	3	4	2	3	3	4	3	4	3	3	3	4	3	4	4	3	4	19155	19345	25376.8	8823.57	24915.5	15759
Q9D1J1	5	5	Necap2	Adaptin ear-binding coat-associated protein 2	13.0814	13.9026	13.8669	10.7857	12.8474	14.48	15.3246	15.2443	15.3319	13.2652	13.5796	13.5934	13.9794	13.0595	13.1149	15.2703	15.4566	15.671	0.236121	0.703128	0	3	3	4	2	3	4	4	4	4	3	4	4	4	3	3	4	4	4	8667.39	15314	14940.1	1765.34	7369.59	22852.1
Q9WUI1	4	4	Mapk11	Mitogen-activated protein kinase 11	13.6792	14.136	13.0857	13.5301	13.4556	13.7249	11.1016	13.2855	11.5739	14.1123	14.2067	13.7857	13.3301	13.3082	13.2902	12.0634	13.0531	12.5429	0.235569	0.577216	0	3	4	3	3	3	3	2	4	2	4	4	3	2	3	3	2	3	2	13117.1	18003.3	8693.59	11829.2	11234.4	13539.7
Q6ZQ11	9	9	Chsy1	Chondroitin sulfate synthase 1	14.289	9.60813	14.1032	12.5116	14.1614	14.2488	16.052	16.1057	16.1008	14.13	13.0408	12.4179	14.2018	14.5344	14.0217	16.1428	15.4733	15.3379	0.235533	0.771303	0	5	2	6	4	6	5	9	9	8	5	4	4	5	6	5	9	8	7	20018	780.43	17599.3	5839.5	18323.6	19467.5
O09167	16	16	Rpl21	60S ribosomal protein L21	21.1414	20.2715	20.9805	20.9447	21.1422	21.0198	19.7168	19.6517	19.815	21.1044	21.1276	20.8342	20.977	21.051	21.3088	20.0294	20.1719	20.1869	0.234183	0.399652	0	17	14	16	16	17	17	11	11	11	16	17	17	17	16	18	14	12	13	2313053	1.26572e+06	2.06904e+06	2.01825e+06	2.31436e+06	2126153
Q99M28	10	10	Rnps1	RNA-binding protein with serine-rich domain 1	15.9263	15.5403	16.0678	15.3838	16.0328	16.2976	16.4122	16.1902	16.3632	16.2043	16.2533	16.0629	16.0158	16.1452	15.9421	16.4532	16.6314	16.6103	0.233813	0.12913	0	7	6	8	6	7	8	6	6	7	8	8	7	7	7	7	7	7	6	62271.6	47653	68688	42755.9	67043.1	80551.8
Q9JJD0	6	6	Thap11	THAP domain-containing protein 11	15.66	15.4827	15.2506	15.4346	15.2941	15.299	12.1308	14.6508	14.6495	15.5169	15.8069	15.4645	15.5824	15.4071	15.242	14.2891	14.2409	14.4039	0.233525	0.582336	0	6	6	6	6	6	6	3	5	5	5	6	6	6	6	6	5	4	4	51776.7	45789.2	38983	44287.1	40177.6	40313.2
Q920Q8	7	7	Ivns1abp	Influenza virus NS1A-binding protein homolog	15.6499	14.2478	15.5091	13.5202	14.9814	15.6894	16.3645	15.577	15.8043	15.8742	14.4279	16.7392	15.1844	14.0094	14.9832	15.978	16.1482	16.0934	0.232681	0.585142	0	4	3	5	3	4	5	7	6	6	5	3	7	4	3	4	6	6	6	51415.8	19454.6	46633.9	11748.8	32349	52841.7
E9Q265	4	4	Sumf1	Formylglycine-generating enzyme	13.2188	13.1463	12.7827	13.7874	13.0224	13.0271	15.4964	15.6767	15.7122	14.1798	13.788	13.3258	13.8105	13.7005	13.3016	14.0152	15.8938	15.9477	0.232535	0.671394	0	2	2	2	3	2	2	4	4	4	3	2	2	3	2	2	3	4	4	9533.6	9066.35	7046.6	14139.4	8320.37	8347.16
P49722	13	13	Psma2	Proteasome subunit alpha type-2	18.242	17.9036	18.1672	17.9864	18.0435	18.2004	18.1948	17.5811	17.9329	18.0625	18.3703	18.1144	18.1675	18.1129	18.355	18.2848	18.3408	18.5334	0.232188	0.0165935	0	13	11	13	13	13	14	13	11	13	13	15	13	14	13	15	13	13	13	310016	245202	294359	259685	270167	301210
Q2VPQ9	4	4	Meaf6	Chromatin modification-related protein MEAF6	14.2059	14.4045	14.3913	14.2721	13.9967	13.4143	14.6991	14.1861	14.042	14.8081	14.8626	14.1439	14.1216	13.4622	14.2196	14.1188	14.7897	15.1717	0.231795	0.29311	0	3	3	3	3	3	2	3	2	2	3	3	3	3	2	3	2	3	3	18897.6	21686.3	21488.8	19784.2	16346.7	10916.8
E9PX66	6	6	Supt7l	STAGA complex 65 subunit gamma	12.4278	13.4948	14.4117	12.0686	12.5064	13.1306	15.3066	15.2521	15.3366	14.946	12.2668	13.6964	12.9609	12.7166	13.2035	15.5265	15.3283	15.3705	0.23113	0.713456	0	3	4	5	3	3	4	6	6	6	6	2	5	3	3	4	6	6	6	5509.89	11543.4	21795.2	4295.51	5818.33	8968.33
P61750	9	4	Arf4	ADP-ribosylation factor 4	16.4114	15.8276	16.9661	16.37	16.432	16.6118	17.3805	16.8556	17.0113	16.5271	16.4617	16.6843	16.564	16.5896	16.5326	17.4464	17.4044	17.7343	0.230894	0.319442	0	7	7	9	8	9	9	9	8	9	7	7	8	8	9	8	9	9	9	87162.3	58152.4	128031	84694.3	88411.7	100147
Q80WT5	9	9	Aftph	Aftiphilin	13.1966	13.5774	14.2931	14.4034	13.3798	13.9477	15.178	14.93	15.5848	14.4273	13.21	13.8167	14.1801	13.9393	15.0652	15.0647	15.6676	15.1877	0.229758	0.556992	0	4	4	7	6	4	6	8	7	9	6	4	5	5	5	8	8	9	9	9387.9	12224	20075.4	21669.4	10658.8	15800.4
Q8CHP8	13	13	Pgp	Glycerol-3-phosphate phosphatase	17.7281	17.4825	17.4841	17.5343	17.4474	17.0703	15.887	16.3258	16.2485	18.2816	17.7255	17.6758	17.621	17.8039	17.3256	16.385	16.1483	16.3075	0.229585	0.513854	0	12	11	12	11	12	10	7	8	8	13	12	12	12	13	11	9	8	7	217111	183127	183331	189822	178731	137614
Q9D0M2	8	7	Cdca7	Cell division cycle-associated protein 7	15.3275	15.3373	14.998	14.8955	14.0291	15.5238	13.706	14.4632	14.7758	15.2742	15.458	15.0063	15.4678	15.2001	14.474	14.3568	15.0601	14.8167	0.228649	0.364037	0	5	6	6	6	4	8	4	5	5	6	6	7	8	6	5	4	6	6	41117.1	41398.5	32723.5	30478.8	16717.3	47112.8
P47199	10	10	Cryz	Quinone oxidoreductase	15.9108	14.6408	16.0147	15.9138	14.0323	15.2541	16.5304	16.1619	15.8732	15.0572	16.4027	15.5485	15.435	15.1424	16.2923	15.4684	15.8872	17.1312	0.225898	0.527173	0	6	5	7	7	4	5	9	9	9	5	9	5	6	5	8	7	9	10	61605.9	25545.7	66207.4	61736.6	16755.1	39077.6
Q6P8H8	5	5	Alg8	Probable dolichyl pyrophosphate Glc1Man9GlcNAc2 alpha-1,3-glucosyltransferase	11.9859	15.3926	16.362	14.4269	15.7474	14.7101	13.8158	14.0135	14.9908	14.1489	12.5019	15.7772	16.1992	15.2014	15.1848	14.8144	14.9381	14.7107	0.225719	0.688315	0	2	4	6	3	5	3	3	4	5	3	2	4	5	4	4	4	4	3	4056.18	43016.8	84224.6	22026.4	55009.4	26803.5
O89086	10	10	Rbm3	RNA-binding protein 3	19.7225	19.8046	19.7659	19.722	20.1187	20.4314	19.2437	19.2127	20.0572	20.2938	20.2655	19.875	20.2758	20.0633	20.1882	19.589	20.1145	19.4344	0.224536	0.198929	0	11	10	12	11	12	12	9	9	10	12	12	12	12	12	12	9	10	9	865091	915768	891493	864775	1.13846e+06	1414070
Q9D289	6	6	Trappc6b	Trafficking protein particle complex subunit 6B	13.7087	13.7837	14.8546	14.7657	14.7867	14.7643	15.8682	15.2689	15.1371	14.5238	14.0469	14.7115	14.5914	14.8096	14.7229	15.7748	15.7238	16.0523	0.224353	0.494843	0	3	3	5	5	5	5	5	5	5	4	3	5	5	4	4	5	5	5	13388	14103	29625.8	27855.7	28264.8	27829
P97364	4	4	Sephs2	Selenide, water dikinase 2	13.3604	12.224	13.0081	13.6606	13.9941	15.0462	14.6504	14.0883	15.3618	14.2211	14.55	13.9183	13.9656	14.5733	14.8623	13.8227	14.0841	13.4141	0.224183	0.547741	0	3	2	2	3	3	5	3	3	5	3	4	3	3	4	4	2	3	2	10516.9	4783.85	8238.21	12949.6	16317.4	33833.9
P61025	4	4	Cks1b	Cyclin-dependent kinases regulatory subunit 1	16.3517	16.4709	16.4384	16.4569	15.4902	16.3397	14.9277	15.4782	16.5102	16.6493	16.7084	16.3673	16.4414	16.2785	15.3191	16.053	16.5818	16.0751	0.223313	0.371196	0	3	3	4	4	3	3	3	3	4	4	4	4	4	4	3	3	4	3	83626.3	90831.9	88807.3	89953.4	46027.5	82934.4
Q922W5	17	15	Pycr1	Pyrroline-5-carboxylate reductase 1, mitochondrial	16.9874	16.1828	17.4778	17.2911	17.2812	16.8196	17.3797	16.6959	16.1918	16.813	17.0161	17.4244	17.1803	17.2626	17.3837	16.989	16.7261	17.5204	0.223174	0.252711	0	14	10	17	13	15	13	13	12	12	12	12	14	16	15	16	13	13	14	129932	74387.3	182535	160378	159277	115663
Q9CWY8	8	8	Rnaseh2a	Ribonuclease H2 subunit A	15.869	15.7259	15.2823	15.511	15.5868	15.5314	10.9891	14.3533	14.3039	15.655	15.9169	15.4255	15.6314	15.651	15.6115	13.6157	13.8876	13.7571	0.222117	0.717561	0	8	8	7	7	8	8	4	6	5	7	8	8	8	7	8	5	7	5	59848	54197.1	39851.2	46695.7	49215.7	47360.8
A0A494BAJ5	4	4	Ccs	Copper chaperone for superoxide dismutase	15.4038	15.3975	15.4624	15.5154	15.4722	15.3832	15.7024	15.285	15.3278	15.565	15.6564	15.5179	15.5486	15.4752	15.6188	15.7389	15.847	15.9779	0.221755	0.00520551	0	3	3	3	3	3	3	3	2	2	3	3	3	3	3	3	3	3	3	43352.5	43161.9	45149.5	46838.7	45457.4	42738.1
Q9CPS7	7	7	Pno1	RNA-binding protein PNO1	16.4002	15.5043	16.3379	16.5637	16.2776	16.2756	14.4525	15.0411	14.8788	16.4309	16.2404	16.5089	15.9893	16.5278	16.3781	15.628	15.171	14.8468	0.22105	0.51826	0	6	5	8	7	7	7	6	6	5	7	6	8	6	7	8	7	6	5	86490	46479.5	82833.7	96869.1	79440	79331.8
Q8BH07	3	3	Arl6ip6	ADP-ribosylation factor-like protein 6-interacting protein 6	15.9984	12.8995	16.6731	16.5131	16.5429	16.6434	16.3503	16.2209	16.4027	16.0322	14.4884	16.9718	15.8366	16.6158	16.9058	15.7211	16.9112	16.7475	0.220675	0.653315	0	3	2	4	4	4	4	4	4	4	3	2	4	3	4	4	3	4	4	65463.2	7640.65	104494	93530	95478.6	102365
Q6YND2	3	2	Znf653	Zinc finger protein 653	13.9598	9.8115	13.6741	13.399	13.4291	13.2221	12.1391	12.5821	13.2029	13.4955	13.8733	13.7231	13.1633	13.2008	13.1427	10.8394	12.9115	13.0545	0.22047	0.672655	0	3	1	3	2	2	2	2	2	2	2	3	3	2	2	2	1	2	2	15934	898.58	13071.5	10801.9	11029.5	9555.71
A0A3B2W4E4	4	4	Emilin2	EMILIN-2	9.30463	9.4078	11.9065	10.9878	11.1856	10.7924	12.537	10.2796	14.7107	8.51385	12.7671	8.94553	9.34802	11.7173	11.6545	14.9617	13.9171	11.2709	0.220446	0.815346	0	1	1	3	2	2	2	3	2	4	1	3	1	1	2	2	4	4	3	632.37	679.25	3838.92	2030.79	2329.13	1773.46
P62320	5	5	Snrpd3	Small nuclear ribonucleoprotein Sm D3	17.8073	16.9109	19.8609	18.2209	19.4087	19.7548	15.2655	14.5623	15.3849	17.8578	19.6356	19.252	17.605	19.6392	18.715	15.6991	15.1614	15.595	0.220441	0.811018	0	5	4	7	6	7	7	3	3	3	5	7	7	5	7	6	3	3	3	229368	123223	952214	305525	695989	884659
Q3TMW1	4	4	Ccdc102a	Coiled-coil domain-containing protein 102A	8.62176	8.77863	8.30366	8.35652	8.97386	8.49541	14.6325	14.2489	14.7277	9.08562	9.26545	9.19679	9.47488	9.52537	8.40689	14.743	13.9404	13.484	0.220402	0.86702	0	0	0	0	0	0	0	4	3	4	0	1	0	0	0	1	4	4	3
Q91V01	8	8	Lpcat3	Lysophospholipid acyltransferase 5	15.8306	16.0767	16.6241	16.1196	16.2608	16.3708	16.9738	16.6039	16.2475	16.2094	16.3465	16.557	16.2445	16.346	16.2479	16.8036	16.8264	17.5054	0.219873	0.244095	0	6	6	7	7	8	8	6	6	6	8	8	8	8	8	8	6	7	7	58276.4	69113.4	101010	71202.8	78521.4	84742.1
Q8C0C0	3	3	Zhx2	Zinc fingers and homeoboxes protein 2	9.01028	12.8229	11.8767	12.8533	12.3211	8.93487	13.2587	13.6911	13.4885	12.5117	9.87232	12.3683	12.9049	9.92162	13.0391	12.9711	13.3661	13.2798	0.219716	0.776106	0	1	2	2	3	2	1	3	3	3	2	1	2	2	1	3	3	3	3	515.66	7245.86	3760.41	7399.74	5117.05	489.4
Q9QXT1	6	6	Dapp1	Dual adapter for phosphotyrosine and 3-phosphotyrosine and 3-phosphoinositide	14.1484	12.8627	14.962	14.6681	14.5786	15.0364	15.2976	14.8494	14.94	14.92	14.4698	14.6635	14.7519	14.7617	14.8056	15.0467	15.1943	14.7046	0.219425	0.397283	0	4	3	5	5	5	6	6	6	6	6	4	5	5	5	5	5	6	5	18159.2	7448.56	31915.4	26033.3	24468.5	33605.4
Q9DCZ4	5	5	Apoo	MICOS complex subunit Mic26	14.4748	13.4564	14.4415	14.2953	14.5534	14.371	15.5956	14.4281	14.6523	13.7509	14.6648	14.8698	14.5804	14.3426	14.6786	14.2596	15.5604	15.5352	0.219338	0.421181	0	3	2	3	3	3	3	4	3	3	2	3	3	3	3	3	3	4	4	22768.9	11240.1	22249.9	20105.4	24044	21188.7
A0A0G2JFE5	3	3	Nudt1	Oxidized purine nucleoside triphosphate hydrolase	14.2174	14.0235	13.9468	14.2986	11.7141	14.1946	10.8992	12.5273	12.085	12.1324	15.2346	14.697	14.8097	12.664	14.3299	11.9281	11.5487	12.5349	0.219221	0.73818	0	4	4	4	4	2	4	2	3	2	2	4	4	4	2	4	2	2	3	19048.2	16653.4	15790.5	20151.1	3359.56	18750.3
P09405	46	46	Ncl	Nucleolin	21.3442	20.4423	21.5534	21.2963	21.5575	21.6995	18.7349	19.0361	19.2644	21.0366	21.4751	21.4392	21.1306	21.5588	21.7441	19.4523	19.308	19.7547	0.21899	0.678756	0	43	38	44	45	43	43	27	27	28	44	46	44	44	43	44	33	28	34	2.66228e+06	1.42479e+06	3.07756e+06	2.57537e+06	3086375	3.40564e+06
Q8BH73	4	4	Qpctl	Glutaminyl-peptide cyclotransferase-like protein	14.5413	13.4856	14.4274	14.3834	14.4191	8.81269	15.4278	15.073	14.9946	14.459	9.87839	14.4135	14.4764	14.4681	14.4166	15.2911	14.9452	15.1843	0.218636	0.803581	0	3	2	4	3	3	1	3	3	3	3	1	3	3	4	3	3	3	3	23844	11469.8	22032.7	21371.5	21907.3	449.66
P47911	26	26	Rpl6	60S ribosomal protein L6	21.6943	21.2158	21.5636	21.1895	21.8605	21.7281	19.6599	19.1091	19.4059	21.3652	21.6575	21.4278	21.4652	21.7167	21.7767	19.9336	19.8982	20.1526	0.218565	0.637681	0	29	27	31	27	33	31	24	19	22	29	31	27	29	30	33	23	21	26	3.39328e+06	2435502	3099590	2.39149e+06	3.80768e+06	3.47384e+06
H3BLL2	5	5	Atpaf1	ATP synthase mitochondrial F1 complex assembly factor 1	15.5511	14.6878	14.4166	15.5019	15.5832	15.5421	10.2091	14.2842	10.6181	14.9241	15.4796	14.8276	14.7865	15.434	15.3684	11.4682	13.0384	13.0297	0.218029	0.800792	0	5	4	4	5	5	5	2	4	2	4	5	4	4	5	5	2	3	3	48012.7	26392.6	21868.5	46402.2	49092.5	47713.6
Q6PD19	7	7	Armh3	Armadillo-like helical domain-containing protein 3	13.8177	13.8856	14.3897	12.9039	13.1379	13.1076	15.5073	14.8394	14.5294	14.1517	13.9704	14.2387	13.7941	13.5559	13.9216	14.778	14.7816	14.8875	0.217904	0.523723	0	4	4	6	3	3	3	7	6	5	4	4	4	4	4	5	6	5	6	14438.9	15134.8	21464.4	7663.92	9013.71	8826.07
Q9CQJ8	6	6	Ndufb9	NADH dehydrogenase [ubiquinone] 1 beta subcomplex subunit 9	15.9856	15.6045	15.7957	15.7	15.7343	15.6822	13.3984	14.0491	14.6074	15.7687	16.2562	16.0125	15.7585	15.9606	15.6375	14.3543	14.3125	14.4558	0.217702	0.597044	0	5	4	6	4	6	5	4	4	5	4	6	6	5	5	6	5	4	5	64885.7	49821.1	56881.5	53232.9	54514.2	52580
Q9CZE3	3	2	Rab32	Ras-related protein Rab-32	12.6203	13.1812	12.1922	10.865	12.7583	12.4308	13.4407	13.2265	12.9604	13.6204	12.1013	12.2763	12.5027	12.9067	12.5595	13.2603	13.3405	13.0667	0.21767	0.493204	0	3	3	3	2	3	3	3	4	3	4	2	3	3	3	3	3	4	3	6296.34	9288.33	4679.56	1865.02	6928.29	5521.43
P03975	18	18	Iap	IgE-binding protein	17.319	16.9825	17.8034	17.3461	17.6539	17.594	17.6	17.721	17.6627	17.6806	17.5458	17.3898	17.4762	17.4739	17.7391	17.5259	17.9518	18.8583	0.217617	0.228648	0	13	9	15	12	14	15	13	14	14	14	14	14	15	15	16	13	15	15	163512	129496	228754	166605	206234	197844
Q8BHE8	5	5	Maip1	m-AAA protease-interacting protein 1, mitochondrial	12.8375	12.8154	14.9278	15.0139	15.4545	15.4758	15.4305	15.2989	14.7637	14.7921	14.8661	14.7479	14.8148	15.2987	15.5248	14.5004	15.1955	14.2362	0.217598	0.576873	0	3	3	5	5	6	6	5	5	5	4	5	4	5	6	6	4	6	4	7319.33	7207.96	31168.6	33085.6	44901.1	45571.5
Q9CRA5	6	5	Golph3	Golgi phosphoprotein 3	15.4394	15.3555	14.7051	15.3181	14.7467	15.0131	14.3454	14.5596	14.6653	15.3422	15.3153	15.2223	15.3392	15.1068	15.2563	14.906	14.8435	14.7676	0.216783	0.169772	0	5	5	5	5	4	4	5	5	4	6	5	5	5	5	5	5	4	5	44434.2	41923.6	26710.8	40852.5	27491.2	33066.1
Q9D8N2	6	6	Dennd10	DENN domain-containing protein 10	12.8875	13.8352	13.9888	13.5914	13.2192	13.1097	15.0805	14.213	14.8057	13.4208	11.9997	14.0048	13.8576	13.9777	14.0557	14.8442	15.1043	15.4142	0.216423	0.614191	0	3	4	4	4	3	3	5	5	5	4	2	4	4	4	5	5	6	6	7577.65	14615.6	16257.9	12343.1	9536.44	8839.32
Q9CXL3	5	5	#N/A	Uncharacterized protein C7orf50 homolog	16.3551	15.3768	16.9537	16.6761	17.0221	16.6789	16.4845	16.763	16.6833	16.7414	16.9998	17.1125	16.797	17.0339	17.2035	16.6211	16.1822	16.2488	0.216317	0.302536	0	3	2	4	3	4	4	3	3	3	3	4	5	3	4	5	3	3	3	83824.2	42547.5	126929	104712	133093	104921
Q8BKZ9	6	6	Pdhx	Pyruvate dehydrogenase protein X component, mitochondrial	14.4713	10.9185	14.9413	14.5061	14.7155	14.9918	15.3416	15.3831	15.2728	14.7899	14.3597	14.5415	14.6346	14.1954	14.6126	15.2516	15.0252	15.0778	0.216256	0.656159	0	6	2	6	4	5	5	5	5	5	4	4	4	5	4	5	5	5	5	22714.8	1935.56	31461.8	23269	26904	32582.3
Q3V0N8	9	5	Slc12a6	Solute carrier family 12 member 4	16.0691	15.0367	15.4639	15.0675	15.8894	14.7557	16.0512	16.0233	15.2993	15.1854	15.9164	16.2459	15.7206	15.4624	15.6809	15.7497	15.8948	15.7429	0.215862	0.285442	0	6	4	5	4	6	4	7	8	6	4	6	7	6	5	6	7	8	7	68750.4	33612.4	45196.6	34337.4	60697.7	27663.9
Q9CWR2	3	3	Smyd3	Histone-lysine N-methyltransferase SMYD3	14.2491	14.4009	13.9727	14.063	13.9431	13.559	8.49041	7.25918	8.63909	14.1222	14.451	14.0076	13.9118	13.5476	13.9269	9.33829	8.18676	9.02048	0.215132	0.872516	0	3	3	3	3	3	3	1	1	1	3	3	3	3	2	3	1	1	1	19471.7	21632.9	16077.1	17115.4	15750.6	12068.4
E9PY39	14	2	Gm20431	Plasmanylethanolamine desaturase	19.2769	18.436	19.0571	18.718	19.0257	18.9528	18.4352	18.2004	18.1571	19.0471	19.1772	19.1525	19.0157	18.9232	19.0377	18.5399	18.62	18.6773	0.214598	0.189583	0	14	11	15	14	14	14	11	10	10	14	13	15	14	15	15	10	10	11	635239	354647	545454	431189	533710	507395
Q571G4	8	8	Lin54	Protein lin-54 homolog	13.6822	15.1051	15.1621	14.9718	14.9821	15.0317	15.0686	15.2872	15.3032	14.8178	15.177	15.2162	15.076	14.9863	15.1336	15.2931	15.4795	15.342	0.21415	0.243066	0	4	6	7	5	5	6	7	8	8	5	6	7	7	7	7	8	8	8	13145	35244.9	36664.9	32134.1	32363.8	33494.9
A0A0N4SV66	11	1	H2aj	Histone H2AX	21.8529	22.0273	21.9407	21.9054	21.7429	21.9336	17.0653	17.0966	16.9576	22.2022	21.7984	21.0688	21.9055	21.9185	21.2912	18.1398	16.9341	19.1798	0.212865	0.839367	0	12	14	13	13	14	15	9	9	9	14	13	12	15	15	12	11	9	11	3.78765e+06	4274494	4.02546e+06	3.92821e+06	3.50975e+06	4005561
Q99PT1	16	16	Arhgdia	Rho GDP-dissociation inhibitor 1	19.6723	19.0591	20.0064	19.5209	19.8487	20.0252	20.1782	19.7771	19.9212	19.799	19.8197	19.8512	19.843	19.8849	19.9587	20.2193	20.2107	20.3368	0.212697	0.123601	0	16	15	18	17	18	18	15	14	15	16	18	17	17	18	19	15	15	14	835525	546211	1053260	752283	944203	1.06702e+06
A0A3B2WBH9	18	18	Tjp2	Tight junction protein ZO-2	14.2407	14.4592	15.6418	13.9204	15.0117	15.6747	16.9571	16.841	17.4333	15.1717	14.6468	15.3299	15.5108	15.6987	15.4815	17.1718	16.4697	16.6116	0.212519	0.678061	0	8	8	12	7	9	10	17	16	17	9	8	10	10	11	12	16	15	17	19358.4	22523.7	51127.5	15504.3	33035.9	52304.7
Q9QXD8	8	8	Limd1	LIM domain-containing protein 1	15.3935	14.7246	15.2805	15.5154	14.368	14.1096	17.3401	17.2448	16.5323	15.7252	14.716	15.2564	15.5216	14.506	15.2156	17.2251	17.1965	17.053	0.211834	0.695731	0	5	4	5	5	4	4	8	8	7	7	4	5	6	4	5	7	7	8	43043.7	27074.2	39799.8	46838.5	21144.1	17677.2
Q62093	4	4	Srsf2	Serine/arginine-rich splicing factor 2	16.7636	16.3124	17.4643	17.1594	16.9543	17.2257	18.2553	18.0203	17.817	17.4509	17.0587	17.3773	17.2373	16.9617	17.0796	18.0855	18.2343	18.3934	0.211819	0.456092	0	4	3	4	4	4	4	3	3	3	4	4	4	4	4	4	3	3	3	111264	81382.8	180839	146381	126984	153266
Q3TCN2	6	6	Plbd2	Putative phospholipase B-like 2	14.6346	14.2319	14.3588	12.4931	14.6801	14.4692	14.8901	14.9574	14.5575	14.4492	14.593	14.5017	14.6012	14.4887	14.6008	14.2896	14.8142	14.8383	0.211567	0.415237	0	5	4	5	3	5	5	5	5	5	4	4	5	5	5	5	4	5	5	25435.7	19241.5	21009.7	5764.94	26251.1	22681.7
Q8BM39	9	9	Prpf18	Pre-mRNA-splicing factor 18	14.3021	15.1199	15.6372	15.5156	15.2944	15.5532	16.1504	15.8972	16.4568	14.8603	15.5856	15.7392	15.5141	15.41	15.1868	16.2501	16.7581	16.5214	0.210987	0.485534	0	4	5	6	6	7	6	9	8	10	5	7	7	7	6	6	9	10	10	20199.9	35607.7	50965.5	46845.6	40186	48080.6
Q9JLB0	8	8	Pals2	Protein PALS2	15.7259	14.9518	14.4548	15.5162	15.217	15.3376	15.1858	15.8885	15.9784	15.3973	15.5018	15.2937	15.6598	15.1732	15.4511	15.4965	16.1919	15.987	0.210708	0.293846	0	5	4	4	5	5	5	5	7	7	6	5	5	7	5	6	6	7	7	54194.2	31691.6	22456.2	46865.2	38087.9	41407.5
A0A0R4J137	3	3	Phyhd1	Phytanoyl-CoA dioxygenase domain-containing protein 1	13.8619	13.6363	12.688	13.0831	13.3406	12.5208	7.94609	11.1023	10.5589	13.7443	13.1188	13.5206	12.9827	12.8261	13.3738	9.749	8.83687	12.4803	0.210514	0.810672	0	3	3	2	2	2	2	1	2	2	3	2	2	2	2	2	0	1	2	14888.1	12733	6598.95	8677.73	10373.4	5876.69
Q9D1J3	17	17	Sarnp	SAP domain-containing ribonucleoprotein	19.7453	19.448	19.7669	19.6497	19.952	19.8072	18.9993	18.7853	19.3164	19.9901	19.9058	19.6364	19.7035	19.636	20.4481	19.2608	19.3355	19.4451	0.210146	0.260318	0	17	12	17	17	18	17	10	10	11	17	16	17	16	17	18	10	10	11	878873	715197	892115	822513	1.01425e+06	917419
D3Z645	8	8	Vps29	Vacuolar protein sorting-associated protein 29	18.2003	18.3437	18.7396	18.597	18.3285	18.3698	18.3335	18.0035	18.5952	18.7098	18.6623	18.7138	18.6322	18.5739	18.4704	18.5824	18.4393	18.6181	0.210118	0.0199618	0	8	10	10	8	8	8	10	9	10	9	9	9	9	10	10	8	10	9	301191	332672	437692	396510	329174	338724
Q8R1F6	5	5	Hid1	Protein HID1	11.8787	8.77863	11.3513	11.5979	12.8629	11.2192	15.9076	14.7807	14.4838	11.7606	12.0311	11.3873	11.6485	12.0835	11.7695	15.7608	14.3774	13.9308	0.209864	0.818014	0	2	0	2	2	3	2	5	4	4	2	2	2	2	2	2	5	4	4	3765.71		2612.72	3099.72	7449.21	2384.12
O88696	6	6	Clpp	ATP-dependent Clp protease proteolytic subunit, mitochondrial	14.1389	12.4647	14.5053	14.5177	14.162	14.49	15.1744	14.8551	14.7538	14.6295	13.6394	14.7086	14.4931	14.2853	14.1258	15.0475	14.9532	15.0679	0.209815	0.498095	0	5	3	5	5	4	5	6	6	6	6	3	4	5	5	4	6	6	6	18040	5652.53	23255.5	23456.7	18330.9	23011.2
P63166	6	6	Sumo1	Small ubiquitin-related modifier 1	17.8628	17.038	17.7661	17.4779	17.2568	17.358	17.1919	17.3819	17.255	17.8031	17.8435	17.9718	17.4045	17.3656	17.3829	17.3809	17.5932	17.7313	0.209809	0.096426	0	7	4	7	6	7	7	5	5	5	7	7	7	7	7	7	5	6	5	238364	134567	222916	182547	156612	167994
D3Z5N5	14	14	Pikfyve	1-phosphatidylinositol 3-phosphate 5-kinase	14.3997	14.1198	15.8629	15.8372	15.5067	15.3539	16.4447	16.318	16.3907	15.4548	15.3099	15.7657	15.5919	14.8711	15.7852	16.4569	16.4869	16.399	0.209751	0.543146	0	7	6	13	11	10	9	16	14	15	9	9	11	11	8	12	15	16	16	21614.8	17803	59594.4	58542.3	46557.3	41878.2
A0A0R4J1R1	6	6	Syvn1	E3 ubiquitin-protein ligase synoviolin	15.1357	14.8458	15.208	14.6814	15.1658	14.6623	16.4145	15.5596	15.3006	14.564	15.1446	14.768	15.1533	15.2505	15.3759	16.5021	15.3961	16.7065	0.209707	0.493961	0	4	3	4	3	4	3	6	4	4	3	4	3	4	4	5	5	4	5	36000.1	29445.9	37849.6	26274.5	36758.1	25929.1
Q6P3B9	4	4	Rbfa	Putative ribosome-binding factor A, mitochondrial	15.0274	14.6181	14.5583	14.6064	14.4473	12.2798	14.6371	14.5194	14.5857	14.3836	14.7989	14.9781	14.364	14.7667	14.8774	13.6559	14.7118	14.6253	0.209126	0.492704	0	4	3	3	4	3	2	3	3	3	3	3	4	3	3	4	2	3	3	33395.9	25147.3	24125.7	24944	22339.4	4972.66
A0A494B9D7	7	7	Naa40	N-alpha-acetyltransferase 40	16.3748	16.0901	16.3791	16.5037	16.3357	16.7548	15.3123	15.6601	15.5237	15.9499	16.8887	16.807	16.6235	16.6666	16.6093	15.8104	16.0159	15.4447	0.209052	0.39159	0	6	5	7	7	7	8	6	6	6	6	8	8	8	8	7	6	6	5	84977.6	69760.1	85233.2	92917	82707.2	110586
A0A0R4IZX3	4	4	Med6	Mediator of RNA polymerase II transcription subunit 6	14.2834	11.3081	14.4819	14.6079	14.5579	14.5388	15.0932	15.2195	15.0556	14.7581	12.6862	14.5073	14.5445	14.7974	14.7729	14.7061	15.0795	15.1738	0.208842	0.659174	0	3	2	3	4	3	4	3	4	4	3	2	3	3	4	4	3	4	4	19940	2535.64	22881.5	24969.4	24118.8	23802.1
Q8K023	11	10	Akr1c18	Aldo-keto reductase family 1 member C18	17.2673	17.0441	17.107	16.9374	16.9151	16.6512	15.5487	15.9055	15.2516	16.9401	16.6068	17.6058	17.2398	16.3111	16.8922	15.3039	15.9442	17.6535	0.207715	0.57024	0	9	9	11	9	8	8	10	10	7	8	8	10	11	8	9	10	11	12	157753	135143	141163	125504	123581	102922
Q8K215	7	7	Lyrm4	LYR motif-containing protein 4	15.8338	15.12	15.9007	15.8822	15.9275	15.9088	16.1418	15.4445	15.8561	15.9671	15.5668	15.9589	15.8871	15.8084	16.1836	16.1864	16.1543	16.1715	0.207655	0.114066	0	7	6	9	7	8	8	9	8	9	9	6	7	7	8	8	9	9	9	58403.9	35608.9	61174.8	60398.5	62322.9	61522.2
P62631	22	2	Eef1a2	Elongation factor 1-alpha 2	22.8286	22.5399	23.4271	22.7318	22.8465	23.1004	20.5356	20.6327	20.5848	22.4041	22.9694	22.9656	22.7534	23.0409	23.0326	21.1359	21.3672	21.4269	0.207615	0.670216	0	19	19	23	21	20	20	15	17	16	18	20	21	20	20	20	15	17	18	7.44895e+06	6.09802e+06	11279074	6.96569e+06	7.54183e+06	8993131
B1AUR6	6	6	Mms22l	Protein MMS22-like	12.7777	13.5409	13.9875	14.108	13.789	13.7709	13.576	13.4427	13.607	13.7766	13.8582	13.9468	13.9248	13.9631	13.8493	13.745	13.8986	13.5009	0.207093	0.148268	0	3	4	5	4	4	5	5	5	5	4	4	5	5	5	5	5	5	4	7022.25	11918.1	16242.3	17657.1	14154.4	13977.8
Q9ERL7	9	7	Gmfg	Glia maturation factor gamma	16.9239	15.9134	17.0482	16.2405	16.9927	17.189	17.4458	17.3264	17.3767	16.7264	17.2026	16.7997	17.0093	17.0852	16.9342	17.302	17.4132	17.8462	0.206909	0.338646	0	8	6	9	7	8	9	7	7	7	9	9	8	9	8	8	7	7	7	124341	61717.3	135523	77424.3	130410	149424
Q9Z2S7	3	1	Tsc22d3	Sperm acrosome developmental regulator	10.1494	10.5098	9.6753	9.87234	10.3308	10.0276	14.6175	13.7132	14.1037	10.1739	9.573	10.0282	10.1628	9.82536	12.593	13.79	14.3785	14.3367	0.206872	0.834694	0	1	1	1	1	1	1	2	2	2	1	1	1	1	1	2	2	2	2	1135.75	1457.98	817.63	937.28	1287.92	1043.77
H7BX99	3	3	F2	Prothrombin	13.1649	12.9829	12.7233	12.7102	12.7785	9.31334	13.7256	12.9783	12.7794	12.9902	13.483	12.6656	13.2541	13.0306	11.2007	12.2469	12.7949	13.3484	0.206443	0.673921	0	2	2	2	2	2	1	3	2	2	2	2	2	2	2	1	2	2	3	9184.14	8095.46	6762.41	6701	7026.21	636.2
Q9D2M8	14	8	Ube2v2	Ubiquitin-conjugating enzyme E2 variant 2	19.0752	18.3587	18.9863	18.8198	19.234	18.9427	18.5509	18.0254	17.9007	18.9252	18.9254	19.0251	19.1108	19.0526	19.133	18.348	18.5689	18.662	0.206366	0.274226	0	13	11	14	13	15	13	11	10	10	15	12	14	14	14	13	8	9	10	552350	336144	519329	462728	616624	503876
P57746	9	9	Atp6v1d	V-type proton ATPase subunit D	16.714	16.0224	16.6468	16.5551	16.6443	16.1453	17.2575	16.9094	17.0829	16.7676	16.0932	16.7635	16.6923	16.7163	16.7479	17.5291	17.4386	17.0785	0.205491	0.311227	0	7	5	8	6	7	7	9	8	9	9	5	9	8	8	9	10	10	9	107499	66562.5	102610	96287.3	102434	72479
P62309	5	5	Snrpg	Small nuclear ribonucleoprotein G	20.0315	19.5509	19.9633	19.5065	19.9742	20.1104	20.2163	19.2323	20.153	20.1271	19.9217	19.9904	19.6798	20.0936	20.0188	20.2627	20.1844	20.3062	0.205156	0.13695	0	4	3	4	3	4	4	4	3	4	4	4	4	3	4	4	4	4	4	1.07169e+06	768056	1.02224e+06	744795	1.02998e+06	1.13197e+06
Q6NVF0	3	3	Ocrl	Inositol polyphosphate 5-phosphatase OCRL	13.1801	13.6134	13.0236	14.3886	12.8936	12.5715	11.617	12.6476	9.45012	13.042	14.1873	13.4659	14.0661	13.2634	14.0568	10.146	9.5682	13.4356	0.205083	0.785244	0	2	2	2	3	2	2	2	2	1	2	3	2	3	2	3	1	1	2	9281.47	12532.6	8326.97	21448.8	7609.66	6086.76
E9Q6G4	10	10	Abca7	ATP-binding cassette sub-family A member 7	14.5066	13.6657	14.8247	13.4682	14.7474	15.0597	15.7761	15.1125	14.7555	14.6993	14.6616	14.2973	14.912	14.2233	14.6987	15.2666	15.3385	15.656	0.204105	0.487209	0	6	5	10	5	9	9	10	9	9	6	6	7	9	6	8	9	10	9	23276.9	12995.5	29018.3	11332.7	27505.7	34151.5
Q6NSQ9	3	3	G6pc3	Glucose-6-phosphatase 3	13.5018	14.2402	12.4747	13.9814	13.6947	13.3127	8.77571	8.20972	9.12808	13.1138	14.2452	13.3206	13.1988	13.192	13.2993	9.749	9.35492	9.68208	0.204084	0.847823	0	3	2	2	2	2	3	0	0	0	3	3	3	3	2	2	0	0	0	11599.4	19352.6	5692.07	16173.7	13259.5	10174.5
P97427	11	8	Crmp1	Dihydropyrimidinase-related protein 1	16.8542	16.6661	17.2878	17.1161	17.1861	17.4641	18.2466	18.1411	18.3684	17.5225	16.9239	17.2308	17.4826	16.9051	16.9538	18.4	18.9913	18.7546	0.203788	0.560979	0	8	7	9	8	9	9	10	11	12	8	8	8	9	8	8	12	12	12	118471	103992	160011	142057	149118	180811
P13516	5	2	Scd1	Acyl-CoA desaturase 1	15.6413	15.1099	15.5808	15.8727	14.7191	15.7636	12.2658	14.6527	12.311	15.6001	16.2975	15.9894	16.0258	15.8472	15.0524	12.7062	13.5424	12.6862	0.203351	0.768832	0	4	3	5	5	3	4	2	4	2	3	5	5	4	4	3	2	3	2	51109	35361.5	49011.2	60000.4	26971.3	55632.1
E0CZ78	13	7	Ppp3cb	Serine/threonine-protein phosphatase 2B catalytic subunit beta isoform	16.4508	16.3161	16.9203	16.6126	16.8638	16.8937	17.0605	16.8543	17.0591	16.9165	16.585	16.8025	16.8414	17.0047	16.8766	17.1871	17.277	17.3687	0.20314	0.113103	0	10	8	11	10	12	10	10	10	9	12	10	11	11	11	10	10	11	10	89574.5	81590.6	124027	100206	119265	121764
A2AJ26	13	13	Abca2	ATP-binding cassette sub-family A member 2	12.2328	12.4844	13.8403	12.2111	9.05189	12.0539	16.3956	16.4218	16.2135	13.7963	12.2667	12.4774	12.2049	11.8026	10.935	16.6537	16.2962	16.3003	0.203091	0.857956	0	5	5	7	6	2	5	12	13	12	7	5	6	5	4	3	13	13	12	4813.34	5730.45	14667.4	4741.29	530.75	4251.95
A0A0U1RNL1	5	3	Maz	Myc-associated zinc finger protein	17.4382	17.9004	17.7319	17.7826	17.5388	17.8665	15.9174	17.2175	17.3474	17.8577	17.708	17.7135	18.0203	17.5337	17.6856	17.1829	17.6369	17.2295	0.203046	0.37512	0	4	5	6	6	5	6	3	4	5	6	5	6	6	5	6	5	6	5	177593	244652	217691	225473	190420	238983
A2A690	41	40	Tanc2	Protein TANC2	18.8305	18.8082	18.6755	18.6951	18.5984	18.4998	16.4475	16.8195	15.9729	18.7805	18.6683	18.6869	18.7791	18.3823	18.7509	16.2755	17.2405	17.6057	0.202462	0.68381	0	42	37	42	43	44	43	27	32	25	44	41	43	43	40	46	26	34	38	466177	459029	418686	424409	396899	370670
A0A2I3BPC5	12	7	Ppp3cc	Serine/threonine-protein phosphatase 2B catalytic subunit gamma isoform	16.0183	16.5552	16.4984	16.2491	16.691	16.1811	16.7869	16.3584	16.5	16.2406	16.7033	16.5488	16.5627	16.6824	16.7002	16.5326	16.7089	16.9812	0.202457	0.073567	0	7	10	10	8	12	8	10	9	8	9	11	11	10	11	12	7	9	9	66372	96297.4	92580.4	77886.4	105800	74301.2
A0A087WQB0	9	8	Morf4l1	Mortality factor 4-like protein 1	15.2729	14.9312	15.2099	14.8728	13.9448	15.0962	16.3033	15.8776	16.3402	15.3742	15.3945	15.2476	15.3607	14.4096	14.4299	16.2816	16.7419	16.4174	0.200958	0.598273	0	7	6	6	6	5	6	9	10	9	7	6	6	7	5	5	9	10	9	39591.2	31242.3	37899.4	30002.3	15768.4	35027
O88958	13	9	Gnpda1	Glucosamine-6-phosphate isomerase 1	17.248	16.6413	17.8054	16.8812	17.5089	17.4789	18.2161	17.8379	17.7021	17.3661	17.484	17.6186	17.5783	17.4154	17.3132	18.1068	17.7508	18.4937	0.200792	0.351115	0	10	8	11	8	10	10	13	13	12	9	9	10	11	9	10	13	12	13	155658	102219	229067	120709	186505	182676
D3Z2A4	5	2	Rrm2b	Ribonucleoside-diphosphate reductase subunit M2 B	16.1095	15.4391	16.2711	16.4178	16.0171	16.2124	15.3965	15.4198	16.0075	16.2157	16.135	16.4083	15.9725	16.3226	16.0525	16.0467	15.9879	15.9489	0.199924	0.181828	0	5	3	4	5	4	4	3	3	4	5	4	5	4	5	5	4	3	4	70704.7	44426.6	79082.3	87548.3	66319.7	75929.7
O88520	4	4	Shoc2	Leucine-rich repeat protein SHOC-2	13.4733	11.9207	14.2124	13.9261	14.2252	14.8147	14.334	14.3709	14.4971	13.9739	13.3138	14.2989	14.4033	14.1778	14.3833	14.1622	14.261	14.5973	0.199676	0.529107	0	3	2	4	4	3	4	4	4	4	3	3	4	4	3	4	4	4	4	11372.9	3876.81	18982.5	15566.3	19151.7	28817.7
A0A1L1SQA8	10	10	Rps25	40S ribosomal protein S25	18.6629	15.7773	19.3813	18.5644	19.3123	19.0704	14.0451	12.7917	15.1476	16.4137	19.1272	16.7031	18.2451	19.4051	19.3186	15.7462	13.4091	16.1808	0.199544	0.856104	0	9	7	11	11	10	9	5	5	7	8	9	9	9	11	11	7	5	7	415046	56163.2	682880	387648	651012	550521
Q3U1F9	6	6	Pag1	Phosphoprotein associated with glycosphingolipid-enriched microdomains 1	11.3933	13.986	11.1578	12.4992	12.693	12.6313	16.1229	16.1728	16.4907	11.2717	11.7379	14.8678	14.2482	12.6916	11.8631	16.2037	15.982	16.0755	0.199382	0.839865	0	2	4	2	3	3	3	6	6	6	2	2	5	4	3	2	6	6	6	2689.85	16225.6	2284.68	5789.42	6621.61	6344.42
G5E8A7	3	3	Samd4b	Protein Smaug homolog 2	8.62176	8.97499	8.30366	8.35652	8.97386	8.49541	13.3905	13.0322	12.681	8.363	9.60509	8.68468	8.4028	9.52537	8.6576	13.327	13.0315	13.0249	0.199115	0.850158	0	0	1	0	0	0	0	3	3	2	1	0	1	1	0	1	3	3	3		503.2
Q8C522	8	8	Endod1	Endonuclease domain-containing 1 protein	14.4976	14.5408	15.8601	15.5399	15.4121	14.4535	17.5573	17.1981	17.4122	15.8017	13.8635	15.8598	15.6833	15.66	15.6141	17.5121	16.8874	17.371	0.197913	0.730134	0	4	4	6	6	5	4	8	8	8	5	3	6	5	5	6	8	8	8	23132.7	23835.7	59479	47640.2	43602.3	22435.3
Q9CQZ6	5	5	Ndufb3	NADH dehydrogenase [ubiquinone] 1 beta subcomplex subunit 3	17.4408	17.353	17.3053	17.326	17.6451	17.4632	15.1897	15.3395	14.8267	17.3284	17.6814	17.3353	17.3993	17.6567	17.7541	15.5053	15.6754	15.3344	0.197886	0.706916	0	5	5	5	5	5	5	4	3	3	5	5	5	5	5	5	4	4	5	177909	167406	161961	164302	204981	180692
Q9CYC6	3	3	Dcp2	m7GpppN-mRNA hydrolase	13.7548	13.848	13.2431	13.3613	13.3276	13.2119	13.4895	13.3104	12.9686	14.058	13.3877	13.4617	13.7104	13.5673	13.7313	13.4696	13.076	13.8328	0.197739	0.15191	0	2	2	2	2	2	2	3	3	2	2	2	2	2	2	2	3	3	3	13823.1	14745.3	9695.76	10523.6	10280	9488.38
A0A0R4J091	5	5	Pole3	DNA polymerase epsilon subunit 3	14.9777	14.4183	14.615	14.8058	15.0771	15.3771	8.0013	8.20972	9.12808	14.7283	15.3997	14.5935	14.5659	15.4293	14.8884	8.68524	7.28327	10.8128	0.197373	0.897361	0	4	3	4	4	4	4	1	0	0	4	4	4	4	4	3	1	1	2	32264.5	21894.3	25093.1	28641	34565.9	42555.3
Q8BGD8	3	3	Coa6	Cytochrome c oxidase assembly factor 6 homolog	14.1942	13.8449	14.4253	14.2208	14.2214	14.1771	14.8669	14.531	14.858	14.5721	14.724	14.699	14.1051	14.2388	13.8616	14.9642	14.9771	14.9713	0.197063	0.281669	0	3	2	3	3	3	3	2	2	2	3	3	3	3	3	2	2	2	2	18745.2	14714.3	22000.6	19093.4	19101.3	18524.4
Q8VDC1	5	5	Fyco1	FYVE and coiled-coil domain-containing protein 1	13.7274	14.2754	13.713	13.6316	11.2636	13.6162	14.3697	14.4331	14.2551	13.1682	13.8008	14.1501	13.3289	13.9501	13.9525	14.3357	14.2546	14.1167	0.196951	0.582604	0	3	4	3	3	2	3	5	5	4	3	4	4	3	4	4	4	5	5	13562.9	19829.5	13428.7	12691.6	2458.48	12556.9
A6H5Y3	7	7	Mtr	Methionine synthase	12.876	10.5071	13.9814	12.7703	11.8288	14.2115	15.1484	14.843	15.0706	13.0629	12.4049	13.9964	13.8248	10.5287	12.9086	15.3312	15.4495	15.5004	0.196675	0.800563	0	4	2	5	4	3	6	8	8	8	4	3	6	5	2	4	8	8	8	7517.53	1455.34	16173.9	6986.4	3637.71	18970.6
Q91VP7	3	3	Tmem101	Transmembrane protein 101	13.106	10.2936	13.2962	13.2691	13.5553	14.178	12.952	13.4697	13.0327	13.3496	10.9618	14.2912	13.8705	13.6149	13.7114	12.9775	13.0724	13.0661	0.195888	0.688721	0	2	1	2	2	2	3	3	3	3	2	1	3	2	2	2	3	3	3	8816.62	1255.12	10059	9871.63	12037.7	18535.2
Q61187	8	8	Tsg101	Tumor susceptibility gene 101 protein	13.2116	13.1441	13.5572	12.7514	13.2872	13.7796	15.414	14.616	14.9989	13.63	13.1933	13.8177	12.8281	12.951	13.0459	15.6365	15.6529	15.7654	0.195667	0.712385	0	4	4	5	4	5	5	8	8	8	5	4	7	4	4	4	9	9	8	9485.89	9052.57	12053.5	6895.14	9996.78	14062.4
E9Q8L9	15	15	Rab11fip1	RAB11 family interacting protein 1 (class I)	15.7927	14.0553	16.1245	15.9365	15.8221	15.9026	16.7997	16.8146	16.7587	16.0079	15.2028	15.97	15.9544	15.8878	16.2646	16.7957	16.9176	16.763	0.195232	0.570899	0	12	7	12	12	12	13	15	14	14	12	8	13	12	12	14	14	15	14	56764.9	17024.7	71444.9	62714	57931.4	61256.2
P61967	5	4	Ap1s1	AP-1 complex subunit sigma-1A	15.8439	14.3334	15.9582	15.6192	15.6286	15.6528	15.4891	15.1953	15.597	15.7793	15.0431	16.0616	15.6531	15.6832	15.6961	15.4846	15.8655	15.8077	0.195202	0.309717	0	6	4	6	6	6	6	5	5	6	6	5	6	6	6	6	6	5	6	58815.9	20644	63663.4	50331.4	50660.1	51517
Q8BWM0	6	6	Ptges2	Prostaglandin E synthase 2	15.136	15.189	15.2893	14.5871	14.9446	14.7669	17.1359	14.778	14.9846	15.0551	15.6878	14.7773	15.3486	15.3235	14.9921	17.7609	15.1243	14.4975	0.195081	0.637001	0	3	3	4	3	3	3	6	4	5	3	4	3	4	4	3	6	5	4	36007.8	37353.5	40044.6	24613	31533.7	27879.8
P70670	8	8	Naca	Nascent polypeptide-associated complex subunit alpha, muscle-specific form	18.2216	17.5959	18.307	17.8132	18.2063	18.2616	18.6052	17.9814	18.2382	17.9428	18.0801	18.2319	18.3391	18.1311	18.2285	18.5654	18.7564	18.7092	0.194895	0.175437	0	7	6	8	7	8	8	8	7	7	7	7	8	7	8	8	8	9	9	305662	198101	324301	230314	302435	314250
P08920	9	9	Cd2	T-cell surface antigen CD2	17.984	17.7751	18.2938	17.9872	18.3404	17.7618	17.7504	17.6315	17.5119	18.1794	17.9616	18.1612	17.9595	18.1304	18.2062	17.5289	18.087	18.574	0.194681	0.159539	0	8	8	9	9	9	8	8	7	6	8	9	9	9	9	9	7	8	8	259252	224297	321357	259837	331897	222249
P61211	8	8	Arl1	ADP-ribosylation factor-like protein 1	14.9978	14.2911	15.3936	14.6927	15.1593	15.0857	15.4108	15.4125	15.1142	14.9369	15.0304	15.2651	15.3919	15.0416	15.234	15.4471	15.3588	15.6037	0.194632	0.194554	0	8	5	9	8	8	8	8	8	9	8	7	8	9	7	8	9	9	8	32717	20047.3	43046.5	26482.4	36594.4	34774.3
Q9CQI6	12	12	Cotl1	Coactosin-like protein	19.9414	19.255	19.6603	19.4073	19.8466	19.9772	19.2567	19.1959	18.9286	20.1449	19.8125	19.9329	19.9068	19.9038	19.9103	19.2956	19.1585	19.1528	0.194335	0.289312	0	11	9	13	10	10	11	11	10	10	12	10	13	11	10	11	11	11	12	1.00682e+06	625672	828584	695301	942806	1.03212e+06
F6UND7	4	2	Hck	Tyrosine-protein kinase Fyn	16.9249	15.9087	16.9952	16.7028	16.7037	16.8949	17.5176	17.5592	17.1072	16.98	16.8049	16.8019	17.0077	17.0089	16.896	17.5967	17.3274	17.6394	0.194305	0.335686	0	4	3	4	3	4	4	3	3	3	4	4	4	4	4	4	3	3	3	124420	61515.8	130635	106672	106736	121862
P63001	14	8	Rac1	Ras-related C3 botulinum toxin substrate 1	19.2871	18.4281	19.2648	18.8786	18.8428	19.2572	19.1836	18.6973	18.8387	19.4417	19.0565	19.5415	19.3193	18.7492	19.0286	18.7865	18.8992	19.6029	0.19413	0.20793	0	13	10	14	12	12	14	12	11	11	13	12	15	14	11	13	11	10	14	639717	352708	629933	481984	470167	626600
P61514	9	9	Rpl37a	60S ribosomal protein L37a	19.2767	19.5191	19.8405	19.6543	19.5182	19.5711	16.4987	16.225	16.252	19.7457	19.9635	19.2694	19.6266	19.5015	19.8191	16.3655	16.8917	16.9182	0.193959	0.795102	0	7	8	8	9	8	8	6	6	5	8	9	7	8	7	9	5	6	6	635116	751363	938806	825159	750857	778915
Q80X32	4	4	#N/A	UPF0461 protein C5orf24 homolog	15.5886	15.091	15.6512	15.3151	15.4273	13.5598	15.0508	14.7485	15.5872	15.8605	14.9393	15.933	15.3955	13.9321	15.7208	14.1434	15.9543	15.886	0.19393	0.578988	0	4	3	4	4	4	2	3	3	4	4	3	4	3	2	4	2	4	4	49276.1	34901	51460.8	40766.3	44064.8	12075.9
P43276	18	12	H1-5	Histone H1.5	22.9316	21.7959	23.1219	22.85	23.1974	23.1137	18.7356	19.0635	18.4958	22.9397	23.2717	22.7409	22.7063	23.217	23.0212	18.1993	18.7437	20.2095	0.193746	0.844528	0	20	18	21	20	21	19	16	17	16	20	21	21	20	21	20	15	18	20	8.00031e+06	3.64098e+06	9128468	7.5603e+06	9618781	9076200
Q9JJ89	5	5	Ccdc86	Coiled-coil domain-containing protein 86	15.1245	13.6313	16.0388	15.4002	15.569	15.4603	16.8076	16.5898	16.8078	15.883	14.2844	16.1539	14.1151	15.5472	15.4916	17.2243	17.2415	17.2266	0.193159	0.716068	0	4	3	6	5	4	4	6	6	6	5	3	6	3	5	5	6	6	6	35721.7	12688.9	67322.1	43245	48611.6	45082.1
P04202	14	14	Tgfb1	Transforming growth factor beta-1 proprotein	16.2089	14.8713	16.5406	16.3815	16.7798	16.7045	17.2854	16.9732	16.8172	16.7399	16.3312	16.3546	16.5706	16.4377	16.5481	17.1107	17.2431	16.9624	0.192873	0.461851	0	8	6	10	8	12	11	11	9	9	10	9	10	11	9	11	11	11	11	75746	29970.6	95328.6	85376.4	112515	106795
A0A1W2P768	14	14	H3c14	Histone H3.1	22.9964	22.0137	23.5913	23.02	22.8721	23.0583	18.3642	17.7139	17.565	22.9801	23.2846	21.9298	22.7337	23.0048	22.6756	18.5315	18.1466	19.6435	0.192819	0.862767	0	16	15	18	17	17	17	13	12	11	16	17	16	18	17	17	12	11	14	8.36753e+06	4234366	12638487	8505553	7.67694e+06	8734572
P56677	4	4	St14	Suppressor of tumorigenicity 14 protein homolog	14.489	14.157	14.3046	14.3629	14.367	14.3666	13.7497	13.6247	14.2568	14.6963	14.5792	14.268	14.4718	14.242	14.4841	14.0179	14.2628	14.3839	0.191986	0.131329	0	3	3	3	4	3	4	4	3	4	4	3	4	4	3	3	4	4	4	22994	18267.8	20234.8	21070.1	21130.5	21123.4
P62488	7	7	Polr2g	DNA-directed RNA polymerase II subunit RPB7	16.3226	16.1871	16.3994	16.2393	16.2868	16.3522	16.2242	15.9191	15.6325	16.3402	16.4042	16.506	16.4676	16.28	16.3355	16.0305	16.3872	16.5394	0.191936	0.0632767	0	6	6	6	6	6	7	7	7	6	7	7	7	7	7	6	6	7	7	81959.5	74610.2	86441.7	77359.8	79947.8	83657.5
E9Q3P9	9	9	Rab11a	Ras-related protein Rab-11B	18.3153	18.1449	18.5871	18.0208	18.4366	18.6408	18.7039	18.2874	18.5591	18.4	18.4841	18.3655	18.4045	18.5657	18.4948	18.669	18.9162	19.1163	0.191129	0.11911	0	10	9	10	9	10	10	9	7	9	10	11	10	9	10	10	8	9	9	326177	289835	393799	265944	354778	408738
P10417	6	6	Bcl2	Apoptosis regulator Bcl-2	15.2958	14.1386	15.0961	15.2783	15.2092	15.4762	12.621	13.7738	13.5175	15.1494	14.7594	15.4285	14.5945	15.6362	15.3704	13.5919	13.4791	14.111	0.190411	0.664129	0	6	4	5	6	5	6	3	4	4	6	4	6	5	6	6	4	3	4	40226.2	18035.6	35024.5	39740.7	37882.4	45583.1
P56183	8	8	Rrp1	Ribosomal RNA processing protein 1 homolog A	14.9376	15.0587	14.8924	14.5434	14.8198	14.8486	15.1243	15.3592	15.6833	14.8248	14.6492	14.391	15.0485	15.1338	15.0518	15.8813	16.4348	15.5653	0.190377	0.439556	0	5	5	5	4	6	5	6	6	7	5	4	4	6	6	6	7	8	7	31381.7	34128.9	30412.9	23878.2	28920	29503
Q91X88	4	4	Pomgnt1	Protein O-linked-mannose beta-1,2-N-acetylglucosaminyltransferase 1	13.8834	13.5752	13.4639	13.7624	13.701	13.4432	13.7064	13.5588	13.145	14.0344	14.2179	14.1121	13.9481	13.7275	13.6756	13.4335	13.4134	13.3852	0.189793	0.160299	0	4	3	4	3	4	4	5	5	4	5	5	5	5	5	5	5	4	5	15112	12204.9	11299.2	13896.5	13317.5	11138.1
A0A571BEH5	6	4	Ikzf4	DNA-binding protein Ikaros	16.5432	15.5473	16.7236	16.7975	16.5516	16.4663	16.6856	16.8943	17.2981	16.5862	16.2679	16.8138	16.6916	16.4561	16.8166	17.2598	17.1521	17.1688	0.189489	0.342095	0	4	3	5	5	4	4	6	6	6	5	4	6	5	4	6	6	6	6	95498	47885.3	108222	113910	96057.8	90542.4
S0DHL8	20	3	Carmil2	Capping protein regulator and myosin 1 linker 2	15.4929	16.5323	16.6605	16.3479	16.4988	16.9097	17.1439	16.9818	17.0351	16.5847	16.6627	16.5744	16.714	16.4456	16.7429	17.1971	17.1356	17.2515	0.189478	0.34715	0	11	13	19	14	13	18	17	18	18	16	16	18	18	15	18	18	19	18	46113.9	94780.2	103586	83409.1	92607.9	123122
Q9WUM3	17	16	Coro1b	Coronin-1B	19.4032	18.8356	19.0404	18.9598	19.1321	19.0649	18.4754	18.1868	18.42	19.0409	19.1908	19.1423	18.9281	19.1864	19.1327	18.7913	18.5712	19.2323	0.188649	0.228658	0	16	12	15	14	16	15	12	10	13	14	15	16	14	16	17	14	13	13	693321	467816	539194	509882	574554	548395
A0A494BAP7	4	4	Kat5	Histone acetyltransferase KAT5	14.8363	14.457	14.6465	14.8621	14.7887	15.4426	12.6259	14.2632	14.7132	14.6123	15.5205	14.8252	14.9147	13.4387	14.7905	14.7327	15.0262	14.4726	0.188641	0.563211	0	3	2	3	3	3	4	2	3	3	2	3	3	3	2	3	3	3	3	29254	22490.5	25646.2	29781.8	28303.9	44533.5
Q9CWQ8	3	1	Castor1	Cytosolic arginine sensor for mTORC1 subunit 1	15.288	14.7742	15.0732	14.7586	14.9912	14.8935	14.0095	13.5559	13.8	14.7943	15.1254	15.0658	15.1913	15.142	15.0251	14.1142	13.8626	14.5169	0.188162	0.48444	0	4	4	4	4	4	4	4	4	4	4	4	4	4	4	4	4	5	5	40007.9	28020.5	34473.4	27719.7	32569.5	30436.2
Q6NXY1	6	6	Tbc1d31	TBC1 domain family member 31	14.8554	14.8555	15.0672	15.2648	15.1802	14.3458	14.4589	14.0253	13.8623	14.8846	14.849	15.1459	14.6914	14.7803	15.2156	14.1549	15.4905	14.3956	0.188045	0.400245	0	3	4	3	5	4	3	4	4	4	4	4	3	3	3	4	4	5	3	29643.2	29644.7	34330.4	39369.8	37126.6	20821.2
E9Q718	11	11	Plod2	Procollagen-lysine,2-oxoglutarate 5-dioxygenase 2	16.8419	16.2202	16.3484	16.1395	15.3588	15.6078	11.9811	10.9144	14.1863	16.714	16.7017	15.9439	16.4529	15.7313	15.6644	12.6381	11.7306	13.7138	0.188021	0.842575	0	12	11	12	11	10	10	5	5	8	11	12	10	11	10	10	5	5	6	117470	76344.2	83437.6	72190.3	42019.4	49934.6
Q5SV80	4	4	Myo19	Unconventional myosin-XIX	12.3488	13.0903	13.3083	13.098	13.4418	11.9785	13.6119	13.6291	13.6926	14.1033	12.919	13.5228	13.1087	13.4703	13.0978	13.4981	13.253	12.9184	0.188001	0.436504	0	2	3	4	3	3	2	4	4	4	4	2	4	3	3	3	4	4	4	5216.29	8721.14	10143.4	8767.66	11127.1	4035.29
Q9JLV2	3	3	Trpc4ap	Short transient receptor potential channel 4-associated protein	12.0368	11.6518	11.6719	11.8356	9.20479	12.3606	11.9977	11.8676	12.1679	8.8009	12.7204	12.3788	12.4927	12.5926	12.04	11.4674	11.8947	12.0953	0.187577	0.717252	0	2	2	2	2	1	2	3	3	2	1	3	3	3	2	2	2	3	3	4201.77	3217.62	3262.81	3654.82	590.09	5259.14
Q6NT99	5	5	Dusp23	Dual specificity protein phosphatase 23	12.5334	13.8474	11.9841	12.3739	12.3974	13.6391	15.7551	14.637	14.5292	12.4786	12.5308	12.2171	13.829	12.2296	13.4624	15.7397	15.1125	15.7849	0.187547	0.778972	0	2	3	2	2	2	3	5	4	4	2	2	2	3	2	3	5	5	5	5928.36	14739.7	4051.22	5307.66	5394.91	12758.2
A0A1D5RM83	4	4	Iqsec1	IQ motif and Sec7 domain 1	12.9802	10.9215	12.4341	10.5624	10.7806	8.30898	13.4027	15.1798	13.8811	13.3623	11.0752	10.6326	10.8042	13.8863	9.38718	14.4917	14.2512	12.2481	0.18748	0.842823	0	2	1	2	1	1	1	2	4	2	2	1	1	1	2	0	2	2	1	8080.47	1939.55	5533.91	1512.13	1759.09	317.14
E9Q852	10	10	Afdn	Afadin	14.9741	15.0754	15.135	15.3896	15.2502	13.8619	15.2785	15.077	14.6259	14.9939	15.1124	15.1625	15.0661	15.1757	14.9943	14.8707	15.1527	15.8253	0.187349	0.3139	0	6	6	9	10	9	5	9	9	8	8	7	7	7	8	8	7	10	10	32184	34526.6	35982.8	42927.2	38974.6	14888
D3YV77	5	5	Mvk	Mevalonate kinase	13.4692	12.6182	13.924	13.6105	13.7455	13.9056	15.8064	14.8195	14.3818	11.0884	14.3237	14.1941	14.5346	14.5391	13.9639	14.6986	14.4389	16.1835	0.18711	0.731735	0	3	2	4	3	3	4	6	5	5	2	3	4	4	4	3	5	5	6	11340.8	6287.24	15543.5	12507.7	13734.4	15346.2
P62889	10	10	Rpl30	60S ribosomal protein L30	19.0555	18.5314	19.1683	18.8226	19.0984	19.2874	18.6643	18.4866	18.7855	19.0892	19.4278	19.1606	19.0825	19.1496	19.1096	18.8055	18.741	19.017	0.186956	0.130043	0	9	8	12	10	10	12	9	8	8	9	11	12	12	10	10	8	8	9	544851	378881	589173	463640	561287	639880
Q9CPR8	10	8	Nsmce3	Non-structural maintenance of chromosomes element 3 homolog	15.8507	15.6162	15.365	15.2135	15.7136	15.9049	13.3931	14.7023	14.9481	15.9354	15.7884	16.0085	15.3506	15.8657	15.8745	14.8163	14.6968	14.0495	0.186496	0.602396	0	8	8	7	6	10	10	5	6	7	8	9	9	8	9	9	6	6	5	59091.2	50227.6	42200.3	37994.4	53737.1	61353.7
A0A087WQS2	22	21	Bzw1	eIF5-mimic protein 2	19.5788	18.7059	19.5042	18.9234	19.4384	20.096	18.7554	18.8041	18.8056	19.167	19.5783	19.6383	19.5331	19.636	19.7482	18.7191	19.1135	19.1527	0.186048	0.364114	0	18	12	19	15	17	21	15	16	14	15	17	20	19	20	21	15	15	17	783073	427593	743643	497172	710462	1.12075e+06
Q9R0B7	7	7	Znf346	Zinc finger protein 346	14.278	14.3347	14.4845	14.2878	14.1703	12.4887	14.3561	14.3396	14.3598	14.2341	14.1892	14.2216	14.2936	14.0828	14.1177	14.358	14.6609	14.612	0.185602	0.405028	0	5	5	7	6	5	3	5	5	6	4	5	6	7	5	5	5	6	5	19866.2	20662	22922.8	20000.9	18437.3	5747.5
A0A338P7B7	3	3	Dynlt1a	Dynein light chain Tctex-type 1	16.2005	13.2742	16.3074	16.5603	16.3627	16.5252	15.7528	16.5965	16.2241	16.5235	15.8962	16.3096	16.2494	16.3867	16.2701	16.1369	16.2438	15.4575	0.185541	0.617305	0	4	2	4	4	4	4	3	4	4	4	3	4	4	4	4	4	4	3	75307.9	9906.91	81101	96641	84269.2	94313.2
D6RCH1	4	1	Eif4g1	Eukaryotic translation initiation factor 4 gamma 1	14.1376	15.0235	15.266	15.1249	15.1391	15.6824	15.4769	15.5506	16.0078	15.2843	15.9923	14.9328	14.9274	15.1329	15.6641	15.3561	16.1138	15.6737	0.185408	0.426967	0	2	2	3	3	3	4	3	3	3	3	4	3	3	3	4	2	3	3	18023.9	33306	39401.6	35730.7	36085.5	52586.5
Q91VJ5	7	7	Pqbp1	Polyglutamine-binding protein 1	17.4	17.8933	17.7637	17.1637	17.6077	17.3733	18.8077	18.2612	18.5006	17.8262	17.3864	17.5366	17.914	17.6351	17.6934	18.5431	18.8137	19.0889	0.185122	0.510793	0	6	6	6	6	7	6	7	7	7	7	6	6	7	7	7	7	7	7	172949	243453	222535	146821	199733	169780
P97864	8	8	Casp7	Caspase-7	15.1815	14.7256	15.5729	15.4701	15.2684	15.7225	15.3995	15.5543	15.6266	15.5443	15.6586	15.9987	15.7037	15.6011	15.4109	15.7086	15.4042	15.1512	0.184419	0.170948	0	6	4	5	6	6	7	6	7	6	6	7	8	8	7	7	6	6	6	37160.1	27092.1	48744.1	45391.9	39468.1	54070.2
A0A494B9K4	20	1	Add3	Gamma-adducin	15.3392	15.7395	16.5448	16.2724	16.2581	16.4479	18.4473	18.1558	17.8839	16.3077	15.9623	16.2482	16.8011	16.245	16.2218	17.9177	18.5046	18.5388	0.184248	0.721348	0	9	9	17	12	13	12	19	20	18	11	11	16	14	13	12	18	20	19	41453.4	54710.6	95604.9	79157.6	78373.8	89391.6
Q5ND52	6	6	Mrm3	rRNA methyltransferase 3, mitochondrial	13.2538	12.9009	14.6043	15.1298	14.6116	14.293	15.4239	14.8357	15.6586	14.7589	14.2789	14.5898	13.9141	14.2788	14.4116	15.4785	15.4316	15.2251	0.183962	0.616953	0	3	3	5	6	5	5	7	5	6	5	4	5	4	5	5	5	6	5	9767.36	7648	24908	35853.3	25034	20073
Q8BGT9	4	4	Galnt12	Polypeptide N-acetylgalactosaminyltransferase 12	11.8593	8.77863	12.3736	9.17901	8.97386	8.49541	14.0862	13.7313	13.8929	13.1927	9.60509	9.18829	9.47233	9.52537	9.38718	13.7959	14.3236	14.5337	0.183762	0.873359	0	1	0	2	1	0	0	3	3	3	1	0	1	1	0	0	3	3	3	3715.52		5306.63	579.64
P51881	35	17	Slc25a5	ADP/ATP translocase 2	21.4022	20.7653	21.7466	21.2367	21.5632	21.614	19.8576	19.6565	20.1802	21.2826	21.7718	21.5667	21.4007	21.6577	21.6989	20.0479	20.044	20.2028	0.183408	0.62382	0	31	32	36	34	35	37	26	25	28	33	34	36	34	35	33	27	26	28	2.77134e+06	1.78234e+06	3518762	2471000	3.09872e+06	3.20976e+06
Q9JJQ0	5	5	Pigb	GPI mannosyltransferase 3	13.8326	12.875	12.7964	13.7265	13.6265	13.505	14.4686	13.9849	13.5967	13.6963	13.2466	12.7984	13.4479	13.4707	13.7172	13.9587	14.9574	14.7678	0.183198	0.535069	0	3	2	2	3	3	3	4	3	3	3	2	2	3	3	3	3	5	4	14588.8	7512.22	7113.75	13554.6	12646.9	11625.7
Q9JIQ3	4	4	Diablo	Diablo IAP-binding mitochondrial protein	14.4891	15.4098	15.3582	15.0389	15.8417	15.4943	15.8347	15.3869	15.7554	15.4558	15.2475	15.2995	15.1513	15.5145	15.6188	15.7034	16.1532	16.1122	0.183034	0.340823	0	2	3	3	3	3	3	4	3	4	3	3	3	3	3	3	4	4	4	22995.7	43532.7	42002.6	33664.7	58725.4	46159.8
P14869	19	19	Rplp0	60S acidic ribosomal protein P0	20.5308	20.0705	20.9261	19.8882	20.7791	20.989	18.6066	18.2944	17.6318	20.3848	20.8769	20.1604	20.3445	20.8462	20.8882	19.1163	18.1432	18.6012	0.18281	0.741319	0	20	18	20	18	20	20	14	13	11	19	20	19	19	20	20	15	12	14	1.51488e+06	1101073	1.99239e+06	970413	1.79936e+06	2081181
Q9JK81	16	16	Myg1	MYG1 exonuclease	17.1872	16.6716	17.4312	17.0858	17.4406	17.4968	18.1633	17.568	17.7328	17.2448	17.2183	17.55	17.4044	17.4627	17.4733	17.9043	17.9759	18.185	0.182377	0.325583	0	12	11	14	15	13	15	15	14	15	13	12	16	14	14	14	14	15	15	149231	104389	176729	139104	177892	184947
P97494	10	10	Gclc	Glutamate--cysteine ligase catalytic subunit	16.1753	14.6025	16.586	16.5322	16.5645	16.518	16.5862	16.4982	16.2989	16.4805	16.2256	16.4909	16.5043	16.3791	16.5078	16.5723	16.7298	16.1105	0.182122	0.422961	0	8	5	10	10	10	9	10	10	8	10	7	9	10	9	9	10	10	9	74001	24876.2	98376.4	94775.5	96920.9	93844.2
Q78T81	12	12	Eeig1	Early estrogen-induced gene 1 protein	14.4327	14.4048	15.1389	14.0128	14.879	15.9294	17.3345	17.1486	17.6623	15.4759	14.6225	14.8758	15.3373	13.5329	14.7637	17.7348	18.2955	17.9411	0.181835	0.808217	0	6	6	7	6	7	9	11	11	11	8	6	7	7	5	7	11	12	11	22114.7	21691.5	36078.7	16530.5	30131	62406.3
Q91WG3	5	5	Trub2	Pseudouridylate synthase TRUB2, mitochondrial	10.8874	14.5545	14.7185	14.3726	14.1351	14.5393	14.4273	14.6341	14.809	14.2145	14.5787	14.1254	13.9684	14.0171	14.5136	14.9183	14.2783	14.0994	0.181774	0.672668	0	2	3	5	4	3	4	4	5	5	3	3	3	3	3	4	5	3	3	1894.17	24062	26959.9	21211.7	17992.6	23809.8
A2ALL9	16	3	Atp2b3	Calcium-transporting ATPase	17.2701	16.5463	16.9203	16.9208	17.1084	17.0474	16.3989	16.2544	16.2567	16.6288	17.1063	17.1622	17.405	17.1432	17.1656	16.5823	16.2527	16.913	0.181737	0.322464	0	12	10	12	11	12	12	10	11	11	11	13	14	14	12	13	11	9	10	158064	95704.7	124028	124075	141301	135451
P56380	5	5	Nudt2	Bis(5'-nucleosyl)-tetraphosphatase [asymmetrical]	13.8686	13.5644	14.0277	13.5021	13.3314	13.6141	14.2784	13.1124	13.6513	13.5194	13.8716	14.0913	13.486	13.8826	13.6028	13.9646	13.9317	14.2338	0.181497	0.231676	0	5	4	5	4	4	5	4	4	5	5	4	5	5	5	5	5	5	5	14957.2	12113.9	16701.5	11601.7	10307.7	12539.1
O08663	10	10	Metap2	Methionine aminopeptidase 2	16.8487	16.8325	16.8027	16.7244	16.5502	16.8489	15.7761	15.8587	17.6485	16.7336	16.6783	16.6165	16.5863	16.3651	16.5033	17.4057	17.5161	17.1182	0.181378	0.446191	0	9	8	9	8	9	8	7	7	10	7	7	7	8	8	7	9	10	10	118024	116704	114319	108281	95962.6	118038
P27048	13	13	Snrpb	Small nuclear ribonucleoprotein-associated protein B	20.1042	19.9049	20.0536	19.7024	19.6623	19.8563	19.1036	18.4753	19.0294	20.1105	19.9464	20.0156	19.8603	19.6567	19.856	19.0748	19.456	19.5425	0.180747	0.410407	0	13	13	13	13	13	13	12	10	12	13	13	13	13	13	13	10	12	13	1127129	981668	1.0883e+06	853132	829734	949193
Q3TWW8	8	6	Srsf6	Serine/arginine-rich splicing factor 6	18.1619	17.2944	18.8207	18.2512	18.2765	18.3451	19.8366	19.2845	19.7455	18.27	18.0602	18.5864	17.9949	18.4008	18.7898	19.5742	19.8223	20.1408	0.180334	0.644804	0	8	6	9	8	8	9	10	9	9	7	7	9	6	9	10	8	9	10	293272	160743	463024	311997	317524	332976
Q5RL51	4	4	Gstcd	Glutathione S-transferase C-terminal domain-containing protein	13.5849	13.0777	13.7061	14.7335	13.8912	12.8916	13.5588	13.627	13.8303	13.7084	13.0369	13.8304	14.4699	14.7853	13.9473	13.8306	13.4338	13.4805	0.180224	0.478551	0	3	2	3	4	3	2	3	3	3	3	2	3	4	4	3	2	3	3	12287.7	8645.37	13364.1	27240.4	15193.5	7599.18
Q6QD59	7	7	Bnip1	Vesicle transport protein SEC20	13.4798	15.7417	15.7332	15.6752	15.5761	15.415	16.9971	16.8583	16.8375	15.9163	15.0404	15.454	15.7209	15.2549	16.1217	16.5885	16.8559	16.9805	0.179916	0.679325	0	3	4	5	5	5	5	7	7	7	5	4	4	5	4	7	6	7	7	11424.3	54792	54469.3	52325.7	48849.6	43689.6
Q8VBZ0	4	4	Dhrsx	Dehydrogenase/reductase SDR family member on chromosome X homolog	13.324	13.0065	12.9986	12.9384	11.992	13.4645	13.3763	13.7054	13.9125	13.1343	13.221	13.2317	13.2755	13.3372	13.0267	13.9077	13.7558	13.4415	0.179252	0.40429	0	3	3	4	3	2	3	3	4	4	4	3	4	3	3	3	4	4	4	10254.5	8229.08	8183.95	7849.44	4073.22	11303.9
Q9DCM2	19	19	Gstk1	Glutathione S-transferase kappa 1	17.7403	17.6246	17.6895	17.6674	17.0923	17.379	17.6735	17.4224	16.7103	17.2302	17.5195	17.6993	17.6064	17.4454	17.3325	17.3763	17.6822	18.7204	0.179185	0.351078	0	17	14	19	17	17	19	20	18	17	15	18	20	18	18	17	18	20	19	218960	202082	211390	208170	139733	170450
Q9CYN9	7	7	Atp6ap2	Renin receptor	14.7372	14.8016	14.8242	14.7271	14.3782	14.8591	15.155	15.2623	15.3076	15.0855	15.1837	14.9076	15.1555	14.8463	14.6773	15.0989	15.558	15.1515	0.179098	0.185151	0	4	4	5	5	4	5	6	6	5	5	6	6	6	5	5	5	6	5	27311.9	28557.7	29008.1	27121.4	21294.2	29719.8
Q91XB0	3	3	Trex1	Three-prime repair exonuclease 1	8.83946	11.9512	13.3211	11.7952	11.7369	8.34172	14.2456	14.1181	14.1936	12.3733	12.4634	12.2902	9.41678	12.3614	9.69511	14.0504	13.7664	13.7316	0.178409	0.849843	0	1	2	3	2	2	1	3	3	3	2	2	2	1	2	1	3	3	3	458.08	3959.88	10233.9	3553.96	3413.13	324.42
A2A994	3	3	Rcan3	Calcipressin-3	13.7392	12.8247	14.2324	14.0552	13.7501	14.0749	13.8343	13.8549	13.8569	13.6851	13.5893	13.9672	14.1908	13.8243	14.1971	14.0564	14.1556	14.155	0.17761	0.266771	0	2	2	3	2	2	3	3	3	3	3	2	2	3	2	3	3	3	3	13674.2	7254.54	19247.5	17022.6	13778.1	17257.6
Q8BMJ3	9	3	Eif1ax	Eukaryotic translation initiation factor 1A, X-chromosomal	18.6357	18.3637	19.0017	18.8168	18.8393	19.2268	17.9463	17.5801	17.2069	19.2995	18.8316	19.2025	18.8369	18.7371	18.7994	17.9114	17.8619	17.7353	0.177565	0.564393	0	12	10	13	11	12	13	10	9	8	13	11	13	13	12	12	10	9	9	407283	337307	524907	461778	469024	613531
Q8R4L0	3	3	Sla2	Src-like-adapter 2	9.0591	8.77863	8.30366	8.58853	9.04775	10.6263	15.1289	13.7536	14.3832	9.08562	8.99997	9.19679	9.47488	9.52537	9.38718	14.6261	14.573	14.3978	0.177439	0.891074	0	1	0	0	1	1	2	4	3	4	0	1	0	0	0	0	4	4	4	533.41			384.95	529.23	1580.64
Q8BXC6	3	3	Commd2	COMM domain-containing protein 2	15.1836	15.0503	14.9577	15.2009	15.0276	14.9698	15.1672	15.2173	15.3759	15.3103	15.2791	14.9528	15.1185	15.1659	15.0924	15.6477	15.655	15.5244	0.177312	0.0829226	0	4	3	3	3	3	3	4	4	4	3	3	3	3	4	3	4	4	4	37213.9	33931.4	31821	37665.1	33401	32088.6
Q62048	4	4	Pea15	Astrocytic phosphoprotein PEA-15	13.3558	10.5806	13.8377	14.01	13.7956	13.9236	14.6379	15.1013	15.2184	14.5313	11.3507	13.9844	13.3799	14.0509	13.575	14.8381	15.2702	15.0735	0.177031	0.7736	0	2	1	2	2	2	2	2	3	3	3	1	2	2	2	2	3	3	3	10483.2	1531.41	14641	16497.8	14219.2	15539.3
P57787	10	10	Slc16a3	Monocarboxylate transporter 4	18.3395	17.84	18.5551	18.3329	17.8132	18.3336	17.8765	17.7358	17.2718	18.6639	18.6281	18.3283	18.2736	18.0589	18.4063	17.8943	17.241	18.1961	0.176908	0.384196	0	9	8	10	10	9	10	10	9	9	10	10	10	10	8	10	9	8	10	331693	234618	385152	330184	230314	330344
Q8K194	4	4	Snrnp27	U4/U6.U5 small nuclear ribonucleoprotein 27 kDa protein	14.2059	14.0085	14.5345	12.2568	13.7299	14.2272	15.3048	14.5648	15.4208	12.643	14.5491	14.2518	14.3791	14.0681	14.0877	15.2944	15.4756	15.0952	0.17675	0.679946	0	3	3	3	2	3	3	5	4	5	2	3	3	3	3	3	5	5	5	18897.8	16480.4	23731.1	4894.14	13587	19178.7
A0A0G2JGY6	4	4	Supt20	SPT20 SAGA complex component	13.3023	13.1643	13.477	12.3505	13.6872	12.76	14.1512	13.572	13.7435	13.3583	13.5478	13.8633	13.9043	13.3154	13.1726	13.4278	13.4471	13.7607	0.176582	0.390728	0	3	3	3	2	4	3	4	3	3	3	3	4	4	3	3	3	3	3	10101.8	9180.26	11402.3	5222.41	13190.2	6936.48
E9QM38	8	8	Slc12a2	Solute carrier family 12 member 2	14.4353	14.1499	15.0672	13.6346	14.9742	14.9193	16.0267	15.3478	16.0652	13.0945	15.1525	14.816	14.8307	14.8718	14.9821	16.1896	16.0128	16.2592	0.176553	0.681081	0	4	4	6	4	5	5	8	7	8	3	5	5	5	5	6	8	8	8	22154.9	18177.3	34329.4	12718.2	32187.6	30984.5
P63260	48	2	Actg1	Actin, cytoplasmic 2	23.7099	23.1626	23.5358	23.413	23.8013	23.9912	22.096	22.0903	22.3865	23.4989	23.886	23.549	23.4846	23.9257	23.8112	22.6179	22.203	22.7957	0.176151	0.593508	0	55	53	58	56	58	58	42	39	40	55	58	58	54	58	59	46	41	47	13721346	9389307	12161386	11168997	14618406	16675278
Q8CGC4	5	4	Lsm14b	Protein LSM14 homolog B	14.1199	14.2494	14.3912	14.5033	12.9838	14.1311	14.5321	14.6749	14.748	14.312	14.0721	14.3986	14.3784	14.2928	14.5194	14.7065	14.4783	14.7589	0.175946	0.366903	0	4	4	5	6	3	4	5	6	5	4	3	5	5	4	5	5	5	5	17803.4	19475.4	21487.5	23224.2	8100.47	17943
Q80X80	4	4	C2cd2l	Phospholipid transfer protein C2CD2L	8.74477	9.80508	12.5544	13.4167	12.0161	12.2843	13.1562	13.4373	13.5672	12.0443	10.2103	12.4635	13.0036	13.2599	9.6847	14.0649	13.5987	12.2336	0.175723	0.818994	0	1	1	3	3	2	3	4	4	4	2	1	2	3	3	1	4	4	3	428.98	894.59	6015.04	10935.1	4142.03	4988.36
A6P3E4	6	2	Mapk8	Mitogen-activated protein kinase 9	14.8778	14.8013	15.4462	13.7079	15.2205	13.6614	16.3511	15.9808	16.1748	12.1306	15.2818	14.2429	15.3343	15.777	15.6213	16.3709	16.5942	16.4493	0.17561	0.762033	0	4	4	5	3	4	3	6	6	6	2	4	3	4	5	4	6	6	6	30107.6	28551.9	44644.7	13381.2	38179.2	12956.7
Q9CQ02	3	3	Commd4	COMM domain-containing protein 4	8.5345	10.9471	8.27817	7.80051	11.5102	8.89175	14.3381	14.11	14.0475	8.435	9.41642	8.65721	12.4351	8.85459	9.12815	14.2092	14.3289	14.5719	0.175412	0.892389	0	1	2	1	1	2	1	3	3	3	1	1	1	2	1	1	3	3	3	370.8	1974.21	310.44	222.94	2916.9	474.99
P62311	3	3	Lsm3	U6 snRNA-associated Sm-like protein LSm3	11.6991	12.7791	14.1673	8.40977	14.4227	14.8345	14.6876	14.4391	14.8707	9.56121	13.6866	9.6637	13.9679	14.4898	14.1636	15.0351	15.5137	15.8017	0.174846	0.870625	0	2	2	3	1	3	3	2	2	2	1	2	1	2	3	3	2	2	2	3324.88	7028.79	18398.8	340.09	21961.2	29217.3
Q9JLI0	11	1	Akr1c12	Aldo-keto reductase family 1 member C13	17.3577	16.7077	16.9556	16.8231	16.8668	17.0285	16.2824	15.8402	16.4302	16.6096	16.8383	17.089	16.9183	16.5913	17.0888	15.8528	17.1399	17.7307	0.174052	0.455474	0	9	7	9	7	8	8	6	5	7	7	9	8	8	8	9	5	7	8	167953	107036	127097	115944	119514	133685
Q8VEB6	4	4	Elac1	Zinc phosphodiesterase ELAC protein 1	13.3444	13.5143	13.0924	13.3003	12.9714	11.2676	13.0334	13.4143	13.5654	13.4358	13.2211	13.5236	13.5284	13.2782	13.1492	13.2673	12.7778	12.8857	0.173742	0.496997	0	3	3	3	3	3	2	3	4	4	3	3	4	4	4	3	3	3	3	10401.1	11700.2	8733.84	10087.3	8031.02	2465.42
E9QAQ5	11	7	Gsk3b	Glycogen synthase kinase-3 beta	15.7298	14.6612	15.6459	15.3627	15.2243	15.405	15.8716	15.2176	15.6315	15.5059	15.2342	15.8293	15.4771	15.4132	15.5482	15.2506	15.8546	16.1994	0.173635	0.294441	0	7	5	8	7	7	7	8	8	7	7	5	8	7	8	8	6	7	8	54342.2	25910	51273.9	42134.7	38280.4	43387.4
Q9CQ92	8	8	Fis1	Mitochondrial fission 1 protein	18.3369	16.5697	17.9906	18.1481	18.2793	18.4074	17.3108	17.3047	17.3214	18.3527	18.3018	18.1849	18.3327	18.1205	18.2613	17.3531	17.3361	16.9879	0.173548	0.538969	0	7	4	7	8	7	7	5	5	5	7	8	7	7	7	7	5	5	5	331107	97270.4	260439	290489	318151	347688
Q9QUM9	20	20	Psma6	Proteasome subunit alpha type-6	19.8224	19.7645	20.0538	19.6989	19.8334	19.8592	19.9208	19.4343	19.4208	19.7528	19.8939	19.9007	19.8702	19.8836	19.9254	19.9675	19.9002	20.2689	0.172771	0.0573629	0	18	18	21	19	19	21	17	17	16	18	19	18	20	21	19	18	17	18	927137	890661	1.08843e+06	851086	934249	951093
Q9CX30	5	5	Yif1b	Protein YIF1B	14.9886	15.0464	14.684	14.8123	15.0105	15.25	14.4421	14.1099	14.7528	14.9584	14.9098	15.1532	15.165	15.1651	15.2675	14.5126	14.8014	14.7179	0.172702	0.243509	0	3	3	3	4	4	4	3	4	4	3	3	4	4	4	4	4	4	3	32510	33839	26322.8	28770.2	33007.3	38967.6
Q3TYD6	8	8	Lmtk2	Serine/threonine-protein kinase LMTK2	12.5814	14.4205	13.2547	13.3681	12.4829	13.0862	15.8837	15.8462	16.6087	14.1541	12.6111	14.6613	12.4056	12.4186	13.4648	15.8273	16.7214	16.8225	0.172699	0.830128	0	3	5	4	4	3	4	7	7	8	5	3	6	3	3	4	7	8	8	6128.95	21927.9	9774.07	10572.9	5724.37	8696.49
H3BJ07	4	3	Golph3l	Golgi phosphoprotein 3-like	12.9277	12.3657	14.9319	14.312	14.2924	14.3695	16.0717	14.9104	14.8321	14.8821	13.3151	14.6548	13.2426	12.8743	14.1956	15.9044	15.5069	15.9917	0.172689	0.7528	0	2	2	4	3	3	3	5	4	4	4	2	3	2	2	3	5	5	5	7791.48	5277.8	31257.4	20339.4	20064.8	21167.1
P63330	13	3	Ppp2ca	Serine/threonine-protein phosphatase 2A catalytic subunit alpha isoform	18.6498	17.7135	18.3156	18.2472	18.2026	18.162	15.4943	15.8617	16.9171	18.1815	18.337	18.4525	18.3411	18.1984	18.1656	16.0807	16.5837	16.7767	0.172603	0.729843	0	14	12	14	12	15	14	10	10	11	14	14	14	14	15	14	9	12	11	411305	214936	326236	311144	301678	293292
Q9EP72	6	6	Emc7	ER membrane protein complex subunit 7	15.8566	15.9292	16.2021	15.9739	15.9647	16.0442	16.4118	16.5134	16.6608	16.0648	16.0194	16.3047	16.2503	15.9751	16.1264	16.7277	16.872	16.769	0.1725	0.271906	0	5	6	5	6	6	5	5	5	6	5	5	6	7	5	5	5	6	6	59333.1	62399.2	75388.2	64363.1	63951.2	67577.2
Q91Z53	13	3	Grhpr	Glyoxylate reductase/hydroxypyruvate reductase	19.1535	18.7514	19.2496	18.9869	18.9174	19.0526	18.6446	18.4924	18.1854	19.2993	19.0155	19.3152	19.2205	19.2232	19.1391	18.4586	18.484	18.8308	0.172477	0.29503	0	14	11	14	12	13	13	13	12	12	14	13	14	14	14	14	13	12	14	583166	441304	623332	519548	495118	543752
D3Z6D2	3	3	Stau2	Double-stranded RNA-binding protein Staufen homolog 2	13.7093	13.2307	12.66	8.60881	12.8399	12.6315	13.02	13.4447	12.3307	13.5996	13.0311	9.31786	12.8037	12.9701	12.8239	13.2867	12.9602	13.2338	0.172363	0.79815	0	3	2	2	1	2	2	3	3	2	3	2	1	2	2	2	3	2	3	13394.2	9612.74	6471.81	390.4	7331.75	6345.51
P11440	23	21	Cdk1	Cyclin-dependent kinase 1	19.0417	18.5391	19.0561	18.8578	18.4968	19.2934	18.6694	18.6465	19.0253	18.9939	18.9444	19.0019	19.0898	19.0313	18.6951	18.9871	19.3117	19.1216	0.172282	0.125108	0	22	16	24	22	19	23	18	16	18	23	20	23	21	23	21	17	20	18	539677	380902	545083	475089	369899	642543
D3YXA6	3	3	Trim46	Tripartite motif-containing protein 46	12.7943	12.2424	14.6119	14.9381	17.5023	13.2079	13.7168	13.1806	13.7184	13.0262	12.9697	16.577	13.1006	13.2589	13.1963	13.7391	13.671	17.924	0.172216	0.831251	0	1	1	2	2	3	1	1	1	1	1	1	2	1	1	1	1	1	2	7103.31	4845.33	25040	31392.2	185663	9462.03
Q08639	4	4	Tfdp1	Transcription factor Dp-1	13.5556	10.7211	13.7162	13.337	13.4835	12.9707	13.1217	13.6738	13.6069	13.7141	11.2305	13.7434	13.4468	13.6087	13.6478	13.4612	13.6994	13.1842	0.172199	0.680425	0	4	2	5	4	4	3	4	5	5	4	2	5	4	4	4	5	5	4	12040.4	1687.96	13457.8	10347.9	11453.4	8027.31
A0A6I8MX27	13	10	Ldhb	L-lactate dehydrogenase B chain	19.7208	19.0763	19.4985	19.4024	19.5296	19.4901	18.5005	18.3942	17.7824	19.583	19.726	19.4877	19.3057	19.4505	19.5324	18.0898	18.5079	19.2601	0.172034	0.557641	0	12	8	11	10	12	12	10	9	9	11	11	10	10	12	12	10	10	11	864068	552771	740683	692934	756840	736376
Q78JW9	8	8	Ubfd1	Ubiquitin domain-containing protein UBFD1	16.7701	15.0831	16.7638	16.3327	17.2904	16.7855	16.9942	16.5829	16.6028	16.4155	16.5327	16.9919	16.6211	16.5988	16.7788	17.0588	16.9108	16.844	0.171883	0.445651	0	7	4	7	5	8	7	6	5	4	5	7	7	6	7	7	6	6	6	111764	34710.3	111279	82536.7	160294	112965
P62827	21	21	Ran	GTP-binding nuclear protein Ran	21.3515	20.5383	21.4043	21.2352	21.2821	21.4119	20.8581	20.438	20.7767	21.3595	21.5669	21.3329	21.2501	21.3609	21.328	20.6579	20.8845	21.1017	0.171813	0.294108	0	18	15	20	18	21	20	17	15	14	19	20	19	18	20	21	15	15	16	2.6758e+06	1.52278e+06	2.77552e+06	2.46848e+06	2.55011e+06	2790074
Q3UL36	7	7	Arglu1	Arginine and glutamate-rich protein 1	16.7304	16.6444	16.8572	16.5138	17.435	16.8544	18.1073	17.2982	17.9012	17.4621	17.1375	16.6583	16.2414	17.0565	17.5422	17.3822	18.0343	18.3734	0.171783	0.559821	0	5	4	4	4	6	5	6	5	6	4	5	5	4	6	6	4	5	6	108734	102440	118718	93572.2	177198	118488
P60229	30	30	Eif3e	Eukaryotic translation initiation factor 3 subunit E	19.5437	18.9254	19.868	19.5485	19.8276	19.8495	19.646	19.3988	19.5338	19.6414	19.583	19.7152	19.6162	19.7518	19.8741	19.8044	19.7686	19.9313	0.171653	0.122148	0	25	21	31	27	26	27	25	25	24	26	26	27	27	28	29	25	25	25	764254	497865	956870	766781	930475	944714
Q8BGF3	9	9	Dnaaf10	Dynein axonemal assembly factor 10	16.3933	16.2847	16.7107	16.5418	16.4313	16.2866	16.6435	16.4928	16.4189	16.5382	16.3944	16.7852	16.401	16.3456	16.5931	16.6924	16.9072	17.0912	0.171643	0.0980233	0	9	9	9	9	9	9	8	9	9	9	9	10	8	8	9	8	9	9	86075.7	79832.7	107253	95405.2	88373.9	79937.9
O88627	3	3	Slc28a2	Sodium/nucleoside cotransporter 2	14.0683	14.0136	13.48	14.1031	14.4906	14.5668	8.4042	12.4479	12.3837	13.7671	14.6114	14.049	14.2114	14.5483	14.5422	9.49556	12.7468	11.5268	0.171116	0.846342	0	2	2	2	2	2	2	1	2	2	2	2	2	2	2	2	1	2	1	17178.5	16539.4	11425.9	17597.8	23020.7	24269.3
Q8BNW9	23	23	Kbtbd11	Kelch repeat and BTB domain-containing protein 11	18.6104	18.4646	18.9388	18.6189	18.5628	18.6172	18.5016	18.1951	18.2935	19.0047	18.6609	18.7075	18.6543	18.2604	18.5537	18.5219	18.9434	19.0352	0.171006	0.14093	0	17	18	23	22	20	19	20	19	18	21	20	21	21	20	22	19	21	20	400223	361746	502513	402575	387222	402106
A2AGL5	5	5	Aven	Cell death regulator Aven	14.4082	11.9568	14.6136	14.6204	14.8667	14.5488	14.9143	15.0807	15.0648	14.425	14.4299	14.6355	14.403	14.532	14.8394	14.7944	14.8419	14.7094	0.170708	0.609124	0	5	3	6	5	6	5	6	6	6	5	4	6	5	5	6	6	6	6	21742	3975.14	25068.2	25186.4	29875.1	23967.5
B1AT66	6	6	Slc16a6	Monocarboxylate transporter 7	9.29009	8.77863	8.95731	10.9271	9.39776	9.30627	14.0401	13.5572	15.8592	9.22992	9.27449	8.86199	11.7791	9.64052	9.41287	14.9788	14.9268	13.5452	0.170668	0.891575	0	1	0	1	2	1	1	5	3	6	1	1	1	2	1	1	5	5	4	626.03		497.07	1947.14	674.54	633.09
Q9DAM5	3	3	Slc25a19	Mitochondrial thiamine pyrophosphate carrier	13.9539	9.65447	14.8691	14.6309	14.7202	14.3032	14.8728	15.0185	14.7426	14.6103	10.1276	14.4379	14.8884	14.8451	14.7153	15.2713	14.7136	14.6895	0.170364	0.827367	0	2	1	3	2	3	2	3	3	3	2	1	2	3	3	3	3	2	2	15868.4	805.91	29925.5	25370.7	26991	20216.5
Q3UKJ7	17	17	Smu1	WD40 repeat-containing protein SMU1	17.5579	17.1988	17.927	17.4291	17.5328	17.6916	18.0305	17.1843	17.7019	17.3474	17.7206	17.699	17.5356	17.4344	17.7782	17.8524	18.0918	18.3272	0.170287	0.247656	0	14	12	17	15	16	16	16	15	17	15	16	16	16	14	18	15	17	17	192955	150436	249214	176472	189628	211688
P62751	15	15	Rpl23a	60S ribosomal protein L23a	21.1035	20.4998	21.1848	20.9142	21.2246	21.0392	19.8711	20.0369	20.0594	21.2083	20.9457	21.1281	21.0645	21.0817	21.0781	20.199	20.302	20.4565	0.170063	0.460296	0	19	16	19	18	19	18	13	13	13	19	19	19	19	18	18	15	14	14	2.25314e+06	1.48269e+06	2.3837e+06	1.97605e+06	2450357	2.15486e+06
Q8VC28	13	3	Akr1c13	Aldo-keto reductase family 1 member C13	17.8747	17.4374	17.6247	17.6566	17.6766	17.8136	17.1233	17.424	17.3976	17.5125	17.4286	17.8962	17.6256	17.3796	17.7622	17.5581	17.9462	18.4496	0.170021	0.229873	0	12	10	11	10	11	11	9	8	10	10	12	11	11	11	12	7	9	10	240339	177493	202095	206615	209497	230365
P62717	20	2	Rpl18a	60S ribosomal protein L18a	20.7092	20.0068	20.6355	20.3992	20.7625	20.5947	19.9407	19.749	19.9728	20.5645	20.9428	20.6642	20.4314	20.7212	20.7977	19.8578	20.0432	20.2775	0.170019	0.350623	0	22	17	20	20	21	19	13	13	15	19	22	21	18	22	21	13	15	15	1.71431e+06	1053516	1.62889e+06	1382862	1778855	1.58346e+06
O55242	3	3	Sigmar1	Sigma non-opioid intracellular receptor 1	14.6655	14.2156	14.8695	14.4975	15.0073	14.871	14.5525	14.7015	14.6499	14.9293	14.6231	14.8007	14.8526	15.1061	15.0809	14.7666	14.7108	14.6905	0.17001	0.0983424	0	4	3	3	4	4	4	3	3	3	4	4	4	4	4	4	3	3	4	25987.3	19025	29934.9	23130.2	32934.1	29966.1
Q99LT0	4	4	Dpy30	Protein dpy-30 homolog	11.0517	13.6062	7.58143	11.2371	13.9852	13.5342	12.7714	11.9468	13.2891	12.7364	9.41572	12.0864	13.0645	13.483	13.4767	8.27761	13.8881	14.1019	0.16969	0.86144	0	2	3	1	2	3	3	3	2	3	2	1	2	3	3	3	1	3	3	2122.65	12470.5	191.53	2413.83	16217	11862.9
G3X8T3	11	11	Ctsa	Lysosomal protective protein	16.001	15.9551	16.1124	15.9509	15.699	15.7217	17.1095	17.0652	16.1877	16.4318	16.1224	16.1252	16.103	15.9669	15.7357	16.4771	17.0279	17.3382	0.169551	0.501069	0	8	8	8	8	8	7	11	11	9	9	8	8	8	8	8	9	11	11	65580.9	63529	70843.9	63341.4	53194	54039.4
Q9JK38	6	6	Gnpnat1	Glucosamine 6-phosphate N-acetyltransferase	15.1962	14.6182	15.5195	15.325	15.4939	14.8666	14.8943	14.8576	14.9522	15.3197	15.3635	15.5401	15.2761	15.2517	15.3013	15.0929	14.9211	15.1791	0.169096	0.178598	0	6	5	6	6	6	6	6	6	6	6	6	6	6	6	6	6	6	6	37542.7	25148	46970	41047	46145.3	29873.4
A0A2R8VHX3	6	1	Aaas	Aladin	16.0752	16.2133	16.1086	15.8405	15.8538	15.9251	15.9314	15.8188	15.7787	15.7688	16.1722	16.2547	16.1	15.75	16.0128	16.2036	16.4038	16.4002	0.168961	0.0915741	0	7	6	7	5	6	5	6	7	7	5	6	7	7	7	6	7	7	7	69041.7	75980.9	70659.4	58677.6	59221.9	62221.7
P31324	8	6	Prkar2b	cAMP-dependent protein kinase type II-beta regulatory subunit	14.3734	13.3163	14.5331	13.9785	14.5198	13.8213	13.9693	13.8995	13.9809	14.1054	13.8963	14.4	14.3005	14.4074	14.6292	13.8595	14.2344	14.0788	0.168826	0.287744	0	7	4	8	5	8	6	6	7	7	7	6	7	7	7	8	5	8	7	21223.7	10200	23708.4	16141.1	23491	14474.8
Q80YR7	6	6	Clspn	Claspin	14.4353	13.7443	13.9047	14.4644	11.3831	15.1889	14.7793	14.531	14.5696	14.6206	11.7442	14.647	14.758	14.1249	13.8226	14.4706	15.1473	15.1841	0.16874	0.744154	0	4	3	4	4	2	5	6	5	5	4	2	5	5	4	4	4	6	6	22153.8	13723.2	15336.3	22606.2	2670.96	37352.3
Q9CZ92	4	4	Cenpp	Centromere protein P	14.736	14.1804	14.4785	14.7427	14.1483	14.5804	14.0848	14.4999	12.5284	14.3942	14.7966	14.7688	14.7839	14.5725	14.239	13.414	14.1282	14.4008	0.168726	0.540601	0	4	3	4	4	3	4	3	4	2	4	4	4	4	4	3	3	3	4	27288.3	18566.3	22828	27415.7	18158.3	24498.7
A0A0R4J085	15	15	Uap1	UDP-N-acetylhexosamine pyrophosphorylase	17.9844	17.8995	18.1991	17.9411	17.7006	18.2657	17.7041	17.5442	17.5352	18.51	17.8757	17.9867	18.2264	17.7666	17.6469	17.9376	18.298	18.0435	0.168605	0.200735	0	12	12	14	14	13	14	12	12	12	13	13	14	14	13	12	13	13	13	259326	244510	300934	251658	213022	315159
A0A3Q4L2X3	4	2	Hnrnpm	Heterogeneous nuclear ribonucleoprotein M (Fragment)	17.8987	17.6915	17.4417	17.4594	17.8086	17.7824	15.7712	17.4245	15.8741	17.8528	18.1284	17.913	17.9341	17.9754	17.8959	16.2898	16.4346	16.2443	0.168479	0.668813	0	3	3	3	3	3	3	3	4	3	4	4	4	3	3	3	3	3	3	244366	211674	178025	180214	229566	225436
Q8BH79	6	6	Ano10	Anoctamin-10	12.0242	11.8566	11.3594	10.389	12.8806	13.7311	14.1893	14.7461	14.717	11.7167	11.8028	12.5505	12.6876	12.0223	11.2443	14.6091	15.4069	15.369	0.168414	0.826193	0	3	3	3	2	4	6	6	7	7	3	3	4	4	3	2	6	8	8	4165.16	3708.5	2627.4	1340.94	7541.31	13598.2
Q9QYF9	5	5	Ndrg3	Protein NDRG3	15.2983	15.2727	15.4023	15.2223	15.1405	15.4732	15.2153	15.0773	15.216	15.3988	15.4893	15.3321	15.5251	15.165	15.2926	15.506	15.5227	15.6013	0.168329	0.0151876	0	5	5	6	5	6	6	6	6	6	6	5	5	6	6	6	6	6	6	40293.5	39587.1	43307.8	38226.8	36118.8	45488.5
Q64310	9	9	Surf4	Surfeit locus protein 4	17.2592	17.0384	17.4265	17.3627	17.4246	17.352	17.4276	17.3342	17.2393	17.297	17.0969	17.4605	17.1772	17.421	17.7128	17.79	17.6897	17.734	0.168286	0.0980549	0	6	5	7	7	7	6	9	8	7	7	6	7	6	7	8	9	8	9	156865	134604	176161	168534	175927	167286
A0A1L1SRW3	4	1	Ppan	Suppressor of SWI4 1 homolog	13.5696	10.5166	13.816	13.743	13.0406	13.8055	13.6401	13.8574	13.8029	13.7745	13.9276	13.5639	13.0232	13.861	11.7324	13.7054	13.7844	13.9339	0.16827	0.700954	0	3	2	4	4	3	3	4	4	4	4	4	4	3	4	2	4	4	4	12158.2	1464.94	14421.9	13710.8	8426.01	14317.9
Q8CIN4	33	25	Pak2	Serine/threonine-protein kinase PAK 2	18.8848	18.5974	19.3424	18.784	19.1322	19.0583	19.2456	18.665	19.0206	19.0776	18.9945	19.0329	19.0977	19.2925	19.1267	18.7982	19.3864	19.435	0.16791	0.142094	0	28	26	33	25	31	29	24	25	25	31	29	31	32	33	31	23	27	28	484059	396607	664710	451375	574590	545895
Q9ESW4	5	5	Agk	Acylglycerol kinase, mitochondrial	15.3656	15.1061	15.6418	15.3323	15.823	15.5743	16.1167	15.8944	15.7816	15.4319	15.9127	15.8437	15.6786	15.6603	15.7483	15.7142	16.0719	16.0841	0.167763	0.203349	0	4	3	5	4	5	5	6	6	5	4	5	6	5	5	5	5	6	6	42219.3	35268.3	51126.6	41255.5	57967.4	48790.3
P21447	11	3	Abcb1a	ATP-dependent translocase ABCB1	13.831	14.4427	14.6068	14.7048	14.455	15.4288	18.1631	17.4835	17.5802	13.6203	15.2786	15.4106	15.9738	15.5298	15.3312	17.9157	17.4397	15.7056	0.1677	0.811109	0	4	5	6	6	5	7	12	11	12	4	6	7	8	7	6	12	12	7	14573.3	22268	24950.6	26704.3	22458.8	44110
O70439	6	6	Stx7	Syntaxin-7	15.4577	15.9357	16.1248	16.0536	15.5057	15.7011	17.1591	16.5928	16.5844	16.2103	15.4674	16.2278	16.0919	15.7862	15.8309	17.1309	16.6927	17.18	0.167027	0.550523	0	3	4	5	4	3	5	6	5	5	5	4	5	4	4	4	6	5	6	45002.1	62680.4	71455.7	68016.1	46524.6	53270.8
Q9D6M3	4	4	Slc25a22	Mitochondrial glutamate carrier 1	14.6801	12.9776	15.285	15.1886	14.8687	15.2984	15.4099	15.0447	15.2134	15.1332	14.9977	15.2007	14.9028	14.7316	15.1587	15.2549	14.993	15.0944	0.166721	0.524486	0	3	2	4	4	3	4	4	3	4	3	4	4	3	3	4	3	3	3	26252.1	8065.57	39926.1	37343.9	29918.1	40296.4
Q9Z0V7	6	6	Timm17b	Mitochondrial import inner membrane translocase subunit Tim17-B	15.5325	15.2154	16.1072	15.1468	15.7688	15.856	16.1165	15.6803	15.6231	15.9434	15.8894	16.2246	15.7027	15.8528	15.905	15.6131	15.6433	15.7724	0.166683	0.217802	0	5	5	5	4	5	6	5	5	5	5	6	6	5	6	6	5	5	4	47395.8	38044.5	70591.1	36278.2	55830.2	59311.5
Q3UA06	12	12	Trip13	Pachytene checkpoint protein 2 homolog	16.7727	15.7418	17.4023	16.9077	17.3922	17.2808	18.2299	17.9162	17.6932	17.0188	16.8743	17.2056	17.0866	17.3836	17.304	18.0146	17.8996	18.0478	0.166443	0.568123	0	10	6	10	8	10	11	13	12	12	8	8	11	9	11	10	13	12	13	111969	54797.9	173226	122951	172021	159234
Q78RX3	4	4	Smim12	Small integral membrane protein 12	15.0578	15.344	14.923	15.1427	14.7975	12.1161	15.4602	15.6412	15.5131	13.391	16.0438	14.9638	14.9252	13.3545	15.7901	14.7858	16.1639	16.0756	0.166425	0.749054	0	3	3	3	3	3	2	4	4	4	2	4	3	3	2	4	3	4	4	34108.5	41591.3	31065.7	36175	28477.7	4439.4
Q6PAL7	9	9	Ahdc1	Transcription factor Gibbin	11.1944	11.3176	14.5607	10.921	11.8073	13.433	15.74	15.253	15.6773	11.7416	12.0181	10.9739	13.5488	13.2302	12.7623	15.7381	15.8861	15.4964	0.165694	0.858536	0	3	3	7	3	4	5	8	7	8	4	4	3	5	5	4	7	8	7	2343.47	2552.34	24165.6	1938.91	3583.98	11059.8
Q8BHZ0	7	3	Cyria	CYFIP-related Rac1 interactor A	14.5781	14.5374	15.005	14.6838	14.7759	12.7189	16.3755	15.9211	16.1416	14.4323	14.718	14.6525	15.0285	14.5711	14.4675	16.0347	16.0261	16.2953	0.165409	0.716397	0	4	4	5	5	5	3	7	7	7	4	5	5	5	4	4	7	6	7	24460	23778.2	32881.3	26318.6	28054.3	6741.62
Q9DC40	7	7	Telo2	Telomere length regulation protein TEL2 homolog	13.2678	13.7662	14.0488	14.3006	12.7479	13.8437	13.6786	13.9322	14.3505	13.9066	14.0542	14.0581	13.7615	13.7579	13.5573	14.2881	13.6526	14.3886	0.165399	0.403746	0	4	5	5	6	3	5	5	6	6	5	6	5	5	5	4	5	5	6	9863.22	13932.6	16947.5	20179.7	6878.59	14701.3
Q61205	8	8	Pafah1b3	Platelet-activating factor acetylhydrolase IB subunit alpha1	17.0467	17.2083	17.5025	17.2711	17.3231	17.388	17.1945	16.5404	16.3215	17.2809	17.548	17.7173	17.3883	17.389	17.3791	16.6589	16.7658	17.1568	0.165318	0.360574	0	8	7	8	8	9	9	7	7	7	8	9	8	8	9	8	8	8	7	135386	151432	185681	158173	163979	171516
O54825	14	14	Bysl	Bystin	17.3875	17.034	17.5901	17.1781	17.4022	17.6199	17.5914	17.3457	17.7133	17.6023	17.4683	17.6575	17.4131	17.5556	17.7361	17.8058	17.6556	17.4527	0.164959	0.0751649	0	12	10	15	10	12	15	12	10	13	15	12	14	11	13	14	12	12	11	171461	134194	197311	148294	173217	201425
B2RXV4	3	3	Flvcr1	Feline leukemia virus subgroup C receptor-related protein 1	13.9686	9.95025	14.4169	13.8379	14.82	13.9824	14.1748	14.9051	15.1784	14.1666	14.0012	13.9052	14.1069	11.1332	14.6113	15.1893	15.0142	14.5873	0.164529	0.804647	0	2	1	3	2	3	2	2	3	3	2	2	2	2	1	3	3	3	2	16031	989.29	21873.4	14642.9	28924.5	16185.7
Q8BGR9	10	10	Ublcp1	Ubiquitin-like domain-containing CTD phosphatase 1	15.7749	15.4478	15.8926	16.0788	15.8478	15.8186	14.6957	15.1462	14.9805	15.9203	15.8448	15.7826	15.9159	15.7572	15.7666	15.0794	15.3065	15.7901	0.164482	0.390909	0	7	6	8	9	9	10	7	8	7	10	7	8	10	8	9	9	8	8	56068.2	44695.4	60833.1	69216.2	58974.3	57792.4
P42932	52	31	Cct8	T-complex protein 1 subunit theta	21.2307	20.7945	21.5786	21.0952	21.411	21.412	21.7321	21.3739	21.5406	21.2649	21.3697	21.4382	21.3682	21.42	21.5182	21.7095	21.6641	21.8926	0.164075	0.173081	0	45	45	50	48	51	52	46	45	45	49	48	50	49	51	52	45	45	49	2.46085e+06	1.81877e+06	3131836	2240231	2.78834e+06	2.79042e+06
Q8BG51	8	8	Rhot1	Mitochondrial Rho GTPase 1	12.9986	13.0191	14.6731	14.084	13.947	14.0489	14.7309	13.8937	14.3035	12.6959	13.3365	13.8138	13.9296	12.9326	13.9379	15.6756	15.5259	15.3255	0.16384	0.706183	0	3	3	6	4	4	4	5	4	5	3	3	4	4	3	4	5	5	6	8184.05	8301.36	26123.9	17366	15793	16949.2
Q9QYS9	9	9	Qki	KH domain-containing RNA-binding protein QKI	16.5129	16.6949	16.6164	16.3096	16.1828	16.3388	16.4451	16.3162	16.4475	16.5778	16.6678	16.5589	16.463	16.4412	16.3935	16.7151	16.6941	16.8264	0.163739	0.0375926	0	9	9	9	9	8	9	9	9	9	9	10	9	10	10	10	9	9	8	93511.7	106088	100471	81223.5	74387.2	82886.2
A0A1D5RLW5	19	1	Rpl18a	60S ribosomal protein L18a	20.4308	19.6936	20.2805	20.1449	20.4964	20.2846	19.5082	19.269	19.548	20.2581	20.6888	20.3722	20.0767	20.4432	20.4698	19.4581	19.5756	19.7841	0.163406	0.446491	0	21	16	19	19	20	18	13	13	15	19	21	20	17	21	20	13	15	14	1413472	847933	1.27362e+06	1.15935e+06	1.47917e+06	1.27724e+06
E9Q6P4	10	10	Tubgcp6	Gamma-tubulin complex component 6	14.1182	14.1518	15.0803	14.5551	14.6946	14.9595	15.0628	14.8956	14.6462	14.8429	14.4259	14.9128	14.9765	14.8538	14.8805	15.1421	14.6122	14.9852	0.163078	0.259902	0	5	6	8	6	7	7	8	9	7	6	5	6	7	6	7	10	7	9	17783.5	18202.5	34643.2	24072.9	26517.2	31859.9
Q8CAB8	4	2	Castor2	Cytosolic arginine sensor for mTORC1 subunit 2	14.4038	14.8599	14.5558	14.1678	14.5741	14.4414	13.8182	13.7675	13.5449	14.5595	14.3486	14.4087	14.7952	14.7758	14.4647	14.0902	13.8157	14.3422	0.163021	0.377556	0	3	4	4	3	4	3	4	4	4	3	3	3	4	4	3	4	5	5	21675.9	29734.8	24084.5	18404.7	24391.6	22248.5
Q61171	8	8	Prdx2	Peroxiredoxin-2	17.3729	17.4921	17.9115	16.9973	17.8817	17.7685	17.7951	17.5379	17.536	17.7018	17.8424	17.619	17.8826	17.9448	17.6461	17.8096	17.7963	17.5174	0.163007	0.148511	0	7	8	9	8	9	8	7	7	7	9	9	8	9	9	8	7	7	7	169729	184353	246543	130824	241510	223275
A0A1B0GRH2	13	11	Ptpre	Receptor-type tyrosine-protein phosphatase epsilon	14.2696	14.6801	15.5664	15.5736	15.3769	15.5548	16.2883	16.2458	16.6066	15.2982	15.165	15.3943	15.7013	15.8653	15.0095	16.7914	16.4416	15.961	0.162817	0.61872	0	6	6	10	9	9	8	12	11	11	8	7	9	10	10	7	12	12	11	19750	26251.2	48522.3	48767.3	42552.3	48136.3
A0A0J9YUA8	3	3	Med13l	Mediator of RNA polymerase II transcription subunit 13-like	12.0351	13.1862	11.4311	8.56358	11.6906	12.1934	12.6261	13.1525	12.7841	12.1944	11.98	9.06348	12.9113	12.5473	12.2418	12.52	12.8703	12.7988	0.162745	0.795184	0	2	3	2	1	2	2	3	3	3	2	2	1	3	3	2	3	3	3	4196.8	9320.39	2761.32	378.35	3305.32	4683.55
P32883	4	3	Kras	GTPase KRas	14.9608	15.2664	15.0188	15.1468	14.9733	15.0536	14.8733	14.1098	15.2363	14.9051	15.2039	14.7194	14.9324	14.9341	14.9219	15.5969	15.8092	15.0658	0.161057	0.345414	0	4	3	4	4	4	4	5	4	5	4	4	4	4	4	4	5	5	4	31889.5	39413.3	33198.3	36279	32167	34008.3
G3UWI9	5	2	Sumo3	Small ubiquitin-related modifier 3	18.6949	18.6806	18.3409	18.5299	18.3456	18.2876	14.7846	15.8069	14.8207	18.555	18.6018	18.239	18.6018	18.8157	18.7008	15.271	15.3577	15.5946	0.160607	0.839133	0	6	6	6	6	6	6	3	4	3	6	6	6	6	6	6	3	3	3	424360	420171	332016	378504	333112	319983
P51682	3	3	Ccr5	C-C chemokine receptor type 5	13.7632	13.7835	13.2531	13.234	12.8938	14.0491	13.7886	13.9579	14.7249	13.5546	14.0761	13.5375	13.7887	13.5294	13.986	14.8192	14.0437	13.5578	0.160557	0.491206	0	2	2	2	2	2	2	3	3	3	2	2	3	3	2	2	3	3	3	13903.6	14101	9763.21	9634.47	7610.38	16950.7
P14206	18	18	Rpsa	40S ribosomal protein SA	18.7905	18.3651	18.7558	18.4499	18.683	18.8047	18.4252	18.2191	18.508	18.5584	18.8724	18.5916	18.694	18.7283	18.7202	18.7641	18.5914	18.924	0.160343	0.0671952	0	18	18	21	19	21	21	16	19	17	19	19	21	20	20	21	18	19	19	453437	337632	442658	358077	420876	457904
Q9D0F4	5	5	Nkap	NF-kappa-B-activating protein	14.3114	14.6461	15.1496	15.0593	14.5783	14.5116	15.6078	15.4061	15.5045	15.0864	14.5563	15.157	14.7966	14.7941	14.9926	15.4638	15.7495	15.621	0.160326	0.453514	0	4	3	5	5	3	5	5	5	5	5	4	4	5	4	5	5	5	5	20330.7	25639.2	36348.1	34143	24462.4	23356.7
Q9D8S9	5	5	Bola1	BolA-like protein 1	15.7419	16.6202	16.4111	16.5294	15.605	15.7604	17.1414	16.5407	16.8826	16.4716	16.3621	16.5287	16.417	16.0139	15.6182	16.9733	16.9452	17.3457	0.160314	0.53053	0	4	5	6	6	4	4	6	6	6	5	5	6	6	4	4	6	6	6	54802	100735	87142.3	94590.2	49841.1	55507.8
Q99M87	8	8	Dnaja3	DnaJ homolog subfamily A member 3, mitochondrial	15.7365	15.4301	15.5971	15.3225	15.5004	15.5639	14.4806	14.5817	14.7273	15.6659	15.6263	15.6227	15.6067	15.5807	15.7496	14.8833	14.9058	14.7416	0.160282	0.455761	0	8	7	10	6	8	10	8	9	9	10	8	9	9	9	8	9	9	9	54596.9	44148.8	49566.5	40976.8	46354	48438.9
Q8BFY6	6	6	Pef1	Peflin	14.7149	14.5572	15.46	15.7597	15.1179	15.832	15.577	15.5441	15.3619	15.8186	15.1247	15.5808	15.4289	15.0262	15.6277	15.3063	15.7603	15.6936	0.160253	0.374687	0	3	3	5	5	4	5	4	4	4	5	4	4	5	3	5	4	5	4	26893.1	24107.8	45073.9	55482.4	35559.4	58333.6
P68181	13	4	Prkacb	cAMP-dependent protein kinase catalytic subunit beta	18.8726	17.5733	17.7135	17.6166	18.5792	18.8633	15.6673	13.792	16.1642	17.7798	18.9296	18.7805	18.9749	18.9212	18.973	14.0675	15.5135	14.3435	0.160145	0.861488	0	15	12	14	12	14	15	9	7	8	13	15	15	15	15	15	6	8	7	479987	195025	214924	200962	391656	476881
Q7TQK4	8	8	Exosc3	Exosome complex component RRP40	16.7848	16.8744	16.3023	16.6546	16.6914	16.6396	14.2601	15.3841	13.5861	16.5908	16.7607	16.7067	16.791	16.61	16.8476	15.0738	14.7976	14.4394	0.160026	0.764099	0	8	9	9	9	9	9	5	8	5	9	9	9	9	9	9	6	6	5	112911	120145	80811.9	103162	105830	102098
P11438	6	6	Lamp1	Lysosome-associated membrane glycoprotein 1	15.2244	14.7853	15.8149	15.6632	15.2686	15.4073	17.3071	16.7099	16.6886	16.1157	15.1455	15.7784	15.1987	15.1166	15.6895	17.1185	16.9406	17.2031	0.159709	0.695222	0	4	4	6	6	5	6	6	7	7	6	5	6	4	4	5	7	6	6	38282.6	28236.3	57645.9	51892.1	39473.6	43456.8
Q6P542	33	32	Abcf1	ATP-binding cassette sub-family F member 1	18.8505	18.2871	19.3854	18.8898	19.0212	19.1727	19.6237	19.2625	18.9584	18.9005	18.9004	19.1896	18.9349	19.011	19.2996	19.3071	19.5696	19.7753	0.159616	0.344385	0	23	19	29	23	25	28	27	26	23	23	23	27	26	24	29	25	27	29	472672	319860	684827	485742	532062	590970
P68040	19	19	Rack1	Receptor of activated protein C kinase 1	20.0249	19.6924	20.3064	19.9351	20.199	20.3264	20.476	20.1154	20.2158	20.356	20.2008	20.3346	20.0585	20.1586	20.1612	20.4151	20.4807	20.5586	0.159186	0.117152	0	17	17	17	17	17	17	16	16	16	17	18	17	17	18	17	17	16	17	1.0668e+06	847250	1296726	1.00244e+06	1203692	1.31482e+06
Q9DC33	5	5	Hmg20a	High mobility group protein 20A	11.5246	11.4923	12.9424	11.4043	11.704	13.1069	15.8589	15.5441	11.8704	11.4338	11.8215	11.4231	11.4412	11.4223	13.113	15.6448	15.3271	15.2534	0.159129	0.855312	0	2	2	3	2	2	3	4	4	2	2	2	2	2	2	3	4	3	5	2946.13	2880.8	7871.22	2710.5	3336.32	8822.19
Q8JZQ9	42	42	Eif3b	Eukaryotic translation initiation factor 3 subunit B	19.9009	19.6745	20.2919	19.8601	20.1415	20.1924	20.386	20.0803	20.2814	20.014	19.9931	20.2022	20.0487	20.0995	20.2196	20.4087	20.5732	20.6802	0.158903	0.183874	0	35	33	42	34	38	38	37	35	37	36	39	39	36	38	37	36	38	39	978986	836765	1.28376e+06	951659	1.15664e+06	1.19818e+06
Q9D2E2	12	12	Toe1	Target of EGR1 protein 1	16.2197	15.4617	16.3205	16.4635	16.4571	16.0617	17.191	16.7106	16.8632	16.2475	16.2368	16.46	16.3512	16.4615	16.3771	16.7588	16.9756	17.3079	0.158596	0.451733	0	9	6	9	9	10	8	12	11	11	10	9	9	9	10	10	10	12	12	76318.1	45127.3	81836.1	90369.5	89966.7	68401
Q3TW96	9	9	Uap1l1	UDP-N-acetylhexosamine pyrophosphorylase-like protein 1	16.6052	16.6262	16.8778	15.1963	16.6478	16.7429	17.529	17.1032	17.5251	16.5416	16.3829	16.6474	16.6568	16.3382	16.9171	17.2433	17.584	17.9669	0.158299	0.601719	0	6	8	9	5	7	8	9	9	10	7	6	8	7	6	9	10	10	10	99693.8	101152	120429	37543	102682	109680
P81069	7	7	Gabpb2	GA-binding protein subunit beta-2	14.8109	15.0209	15.3456	14.905	15.3668	15.0851	16.3307	15.0557	15.9127	14.9807	15.0329	15.2739	15.3844	14.2008	15.1984	16.1907	16.4721	16.5234	0.158221	0.614099	0	4	4	5	4	5	4	5	3	4	4	4	4	5	3	5	5	5	5	28742.2	33245.7	41637.1	30679.1	42252.9	34759.4
A0A0R4J0C8	8	8	Eri1	3'-5' exoribonuclease 1	16.8692	16.838	17.2665	16.9788	16.958	16.9828	16.2694	16.4343	16.49	17.1443	16.856	17.2009	16.9842	17.0825	17.2402	16.6476	16.6692	16.6853	0.158136	0.252376	0	7	7	8	7	7	7	5	5	5	8	6	8	7	7	7	5	5	5	119715	117153	157666	129160	127307	129519
Q3THS6	19	19	Mat2a	S-adenosylmethionine synthase isoform type-2	19.8994	19.0208	19.6584	19.35	19.8023	19.7808	17.4206	18.029	18.3563	19.7984	19.9006	19.6621	19.6827	19.7989	19.7131	18.1264	17.8985	18.1596	0.158083	0.707199	0	21	15	20	17	20	22	13	14	13	21	21	20	20	21	21	14	14	15	977931	531883	827501	668239	914278	900769
A0A494BB49	13	13	Cd5	T-cell surface glycoprotein CD5	18.9321	18.9074	18.7184	18.5367	18.531	18.2927	17.9728	17.9374	17.7615	19.3188	18.8197	18.7369	18.789	18.1447	18.4111	17.8529	18.3533	18.5836	0.157793	0.447661	0	14	12	14	15	13	13	14	13	14	15	12	15	14	12	12	14	13	15	500171	491693	431329	380272	378777	321100
Q7TNG5	12	12	Eml2	Echinoderm microtubule-associated protein-like 2	17.1509	17.1558	17.3555	17.3884	17.2794	17.3819	17.4458	17.1088	16.9307	17.2062	17.3601	17.5261	17.4546	17.3297	17.4417	17.3518	17.4222	17.5228	0.157561	0.0287881	0	9	9	10	10	10	13	12	12	12	10	9	11	11	11	11	11	12	12	145527	146018	167698	171570	159084	170789
O35286	45	43	Dhx15	ATP-dependent RNA helicase DHX15	19.8919	19.8246	20.0189	19.6177	19.9098	20.012	19.9614	19.6136	19.6746	20.0173	20.0708	19.9808	19.8829	19.9196	19.9934	19.9767	19.9239	20.1768	0.157511	0.0214907	0	37	33	43	35	39	41	44	41	41	41	40	42	42	40	41	42	44	43	972857	928565	1.06242e+06	804493	985050	1.05733e+06
Q9DB15	7	7	Mrpl12	39S ribosomal protein L12, mitochondrial	17.3112	16.6301	17.3367	17.1693	17.7557	17.2578	17.4461	17.4605	16.8959	16.9783	16.3528	17.3071	17.5083	17.8249	17.5794	17.7888	17.6044	17.7367	0.157478	0.426267	0	7	6	7	6	8	7	6	6	5	5	5	7	8	7	7	6	5	5	162621	101426	165523	147394	221313	156716
P26231	13	11	Ctnna1	Catenin alpha-1	15.3241	15.3068	13.6988	15.2312	15.0445	14.3143	16.7868	16.2652	17.0744	15.3047	15.0272	15.3229	14.3899	15.0879	15.0021	16.6941	16.7826	16.8513	0.157408	0.746059	0	7	7	6	7	8	6	12	12	13	7	7	9	6	7	8	11	12	13	41020.3	40532.4	13297.1	38464.2	33794.9	20371.9
Q3UE37	13	13	Ube2z	Ubiquitin-conjugating enzyme E2 Z	16.8835	16.3827	17.0214	16.6154	16.9421	16.5214	17.2944	16.9725	17.2436	16.8033	16.9268	16.9306	16.6855	16.6548	16.7057	17.3758	17.5157	17.6947	0.157322	0.361095	0	12	10	12	12	13	9	8	11	10	12	12	13	11	11	11	10	10	11	120901	85442.1	133029	100401	125919	94064.9
Q8K003	5	5	Tma7	Translation machinery-associated protein 7	19.1082	18.8376	18.4412	17.9995	18.0323	18.3712	14.312	16.9042	17.2282	18.7384	18.4392	18.6527	18.9691	19.0652	18.9476	17.0307	14.6322	16.1742	0.15725	0.827672	0	5	5	5	4	4	4	3	4	3	5	4	5	5	5	5	4	3	4	565111	468474	355910	262060	268072	339058
Q3UA16	8	8	Spc25	Kinetochore protein Spc25	16.3565	16.5889	16.2843	16.2936	15.9377	16.5095	15.8104	15.6515	15.359	16.5369	16.4287	16.4408	16.4913	16.3265	16.1589	15.8974	16.0909	15.8283	0.156485	0.356212	0	7	8	8	9	8	10	8	8	7	10	9	10	10	9	10	9	9	7	83906.4	98573.6	79810.8	80325	62765.1	93293
P58466	3	3	Ctdsp1	Carboxy-terminal domain RNA polymerase II polypeptide A small phosphatase 1	14.5603	14.3774	14.6467	14.4747	14.4687	14.4561	13.8871	14.0453	14.0664	14.5773	14.4877	14.721	14.4845	14.7041	14.3535	14.217	14.3325	14.5114	0.156255	0.153664	0	3	2	3	2	3	2	3	3	3	2	2	3	2	3	2	3	3	3	24158.8	21282.3	25651	22767.2	22673.6	22476.7
Q60676	18	18	Ppp5c	Serine/threonine-protein phosphatase 5	18.1376	17.3805	17.843	17.937	18.0361	18.2303	17.5786	17.791	17.7538	17.9178	18.2051	18.019	18.2193	18.1958	18.2342	17.6792	17.8549	17.7683	0.156183	0.1913	0	16	11	16	14	13	17	13	13	13	13	16	14	16	15	13	16	14	15	288376	170627	235112	250948	268784	307507
E9PV93	14	14	Ly9	T-lymphocyte surface antigen Ly-9	16.3192	16.1568	16.9522	16.8288	16.957	17.2123	16.4902	15.7114	15.8886	16.5423	16.8498	16.907	17.1476	16.7955	16.9623	16.382	16.0127	16.32	0.155832	0.473567	0	10	9	12	12	12	13	12	10	10	10	10	12	12	10	12	10	10	10	81765	73060.1	126804	116408	127226	151847
Q8VDP6	11	11	Cdipt	CDP-diacylglycerol--inositol 3-phosphatidyltransferase	16.9389	16.1259	16.9796	16.5988	16.8431	17.1761	16.6731	16.6764	16.5544	16.6821	16.8914	16.8886	16.8321	16.9364	17.0926	17.1025	16.6462	16.8952	0.15564	0.190002	0	10	6	11	8	9	11	9	11	9	10	8	9	10	9	10	9	9	9	125636	71512.5	129228	99249.9	117569	148092
F8WIJ0	12	8	Slc12a4	Solute carrier family 12 member 4	15.6214	14.9412	15.711	16.016	15.8461	15.3309	16.3656	16.2898	16.5646	15.6463	15.3499	16.3235	15.7055	15.9631	15.9259	16.6206	16.271	16.2783	0.155266	0.488059	0	6	5	7	8	7	6	8	10	11	6	6	10	7	9	9	11	10	9	50410.7	31459.4	53639.9	66267.5	58906.3	41216.4
Q69ZF7	5	4	Cnnm4	Metal transporter CNNM4	12.634	12.6618	15.2418	14.5901	15.0764	14.4678	15.1117	15.0787	15.0363	14.2263	11.306	14.9662	14.9334	14.3252	15.2878	15.4115	15.4587	15.3803	0.155209	0.784825	0	3	3	6	5	6	5	6	6	6	4	2	6	6	4	6	6	6	6	6356.37	6480.03	38747.3	24664.5	34550.6	22659.1
P17182	50	43	Eno1	Alpha-enolase	23.11	22.7399	23.1038	22.8899	22.9381	23.0062	21.6279	21.4408	21.0234	23.1354	23.0803	22.9941	23.0987	23.0198	23.0432	21.7007	21.2625	21.9332	0.154188	0.680772	0	60	53	62	57	57	61	47	48	48	60	59	61	60	57	61	52	48	51	9053122	7004757	9014436	7772265	8036146	8424753
Q8VCQ3	3	3	Nrbf2	Nuclear receptor-binding factor 2	13.3761	12.4382	12.9242	13.0957	12.9351	12.3124	14.2449	13.9423	13.158	13.1644	12.8088	12.6634	12.5324	13.3033	13.127	14.5926	14.2671	13.3529	0.153885	0.630202	0	3	2	3	3	3	2	4	4	3	3	2	2	2	3	3	4	4	3	10631.6	5549.84	7772.91	8753.54	7831.39	5086.19
D3YUB9	5	5	Pabpn1	Polyadenylate-binding protein 2	16.5455	16.7867	16.9346	16.5634	16.7106	16.7612	17.7443	17.6724	17.5568	17.1611	16.7656	16.8477	16.8328	16.7143	16.9437	17.6845	17.6575	18.0485	0.153378	0.514319	0	5	6	6	4	5	5	6	6	6	6	5	5	5	5	5	6	6	6	95650.4	113055	125260	96844	107246	111074
Q9JI13	7	7	Utp3	Something about silencing protein 10	15.8439	13.4734	16.0136	15.8186	15.837	15.8395	15.9298	16.0345	15.9909	16.1157	14.729	15.861	15.6002	15.8993	15.7088	16.1429	16.2516	15.8507	0.153118	0.629582	0	7	4	8	7	7	8	8	8	8	8	5	7	7	8	6	8	8	7	58816.1	11373.6	66155.9	57792.2	58535	58635.8
E9PV44	3	3	Atpif1	ATPase inhibitor, mitochondrial	18.4342	18.7101	18.0415	18.3488	18.4911	18.3387	9.91998	8.6793	10.0913	18.4795	18.7048	18.2551	18.4548	18.4844	18.5247	10.3174	9.16375	10.04	0.152158	0.942232	0	3	3	3	3	3	3	1	1	1	3	3	3	3	3	3	1	1	1	354205	428850	269790	333844	368445	331508
P17918	23	23	Pcna	Proliferating cell nuclear antigen	20.1153	19.6122	20.5769	19.9029	19.8502	20.2421	20.3465	19.8589	20.1279	20.3421	20.1575	20.2353	20.1668	20.0432	20.0303	20.0852	20.5154	20.426	0.152098	0.200817	0	23	19	24	23	23	21	18	17	18	23	23	23	22	22	23	16	18	18	1.13584e+06	801445	1.56406e+06	980297	945184	1.24018e+06
Q91V08	6	6	Clec2d	C-type lectin domain family 2 member D	15.0297	14.9243	14.7321	14.5156	14.3972	15.5638	14.7952	14.4134	13.9437	15.1996	14.9537	15.2051	15.7832	14.6337	14.5242	14.1727	14.3684	14.8413	0.151885	0.510634	0	4	5	5	4	4	6	4	4	3	5	5	6	6	5	4	3	3	4	33448.9	31093.1	27214.2	23422.3	21576.2	48435.2
Q6P5G3	5	5	Mbtd1	MBT domain-containing protein 1	14.1834	14.1826	14.228	14.3043	14.0744	13.9146	14.1904	13.5496	14.0459	14.1861	14.0344	14.3302	14.4121	13.8768	14.0158	14.2718	14.4964	14.4163	0.151861	0.163035	0	4	3	4	4	3	3	5	4	4	4	3	5	5	3	3	3	5	5	18604.6	18594.9	19188.9	20231.5	17251.3	15442.5
Q91Z92	5	5	B3galt6	Beta-1,3-galactosyltransferase 6	14.2867	13.7407	14.267	14.241	14.3988	14.224	13.5956	13.7721	13.4131	14.1559	14.2773	14.4159	14.2019	14.3888	14.275	13.6588	14.0016	13.9302	0.151818	0.311791	0	5	4	5	5	6	6	5	5	5	5	4	6	5	5	6	4	6	5	19985.5	13689.1	19715.4	19362.8	21601.2	19136.2
Q8VE38	5	5	Oxnad1	Oxidoreductase NAD-binding domain-containing protein 1	13.6988	13.7962	14.4519	13.5495	14.7302	14.6888	11.8591	9.13837	10.1199	14.6605	14.7438	14.6936	13.5593	14.6729	14.694	10.617	9.58246	10.1737	0.151625	0.88279	0	4	4	5	4	5	5	3	2	2	5	5	5	4	5	5	2	2	2	13296.6	14225.9	22411.1	11989.4	27178.2	26410
Q9D654	4	4	Zfp84	Zinc finger protein 84	13.5161	12.9087	13.442	13.6526	13.2636	13.1396	13.3815	13.182	12.7594	13.4582	13.539	13.1207	13.5362	13.7814	13.9929	13.2047	12.7777	13.1956	0.151229	0.345762	0	3	2	3	4	3	3	3	3	2	3	3	3	3	4	4	3	2	3	11715.3	7689.5	11128.9	12877.5	9833.96	9024.22
Q924Z6	19	19	Xpo6	Exportin-6	16.6887	15.2771	16.3889	16.6018	16.6582	16.8978	16.653	16.7359	17.0615	16.5777	16.7148	16.7687	16.3383	16.9648	16.6682	16.6565	16.8626	16.769	0.150858	0.41719	0	11	7	12	12	12	12	15	16	18	11	10	14	10	14	12	13	18	18	105635	39708.2	85810.6	99457.6	103421	122104
K4DI77	12	12	Wdr81	WD repeat-containing protein 81	15.1082	13.7931	15.6626	15.2367	15.151	15.1297	16.4156	15.941	15.9775	15.2048	15.2714	15.742	15.1182	15.1983	15.1863	15.9372	15.826	16.286	0.150562	0.608889	0	8	5	11	8	7	7	11	11	11	8	8	10	8	8	7	11	11	11	35320	14194.7	51869.3	38610.1	36382.7	35849.5
P35700	21	19	Prdx1	Peroxiredoxin-1	19.2052	18.806	19.4721	18.7165	18.6196	19.0603	19.8591	19.4202	19.4899	19.1076	18.9412	19.0703	19.1149	19.1772	18.9336	19.6649	19.8641	20.1276	0.150273	0.46577	0	20	17	21	16	19	21	18	19	15	19	19	18	20	21	20	18	17	19	604404	458332	727256	430755	402778	546676
P62702	33	33	Rps4x	40S ribosomal protein S4, X isoform	22.0527	21.6625	21.9434	21.8184	22.075	22.1654	20.4071	20.9292	20.9417	21.8978	22.1923	21.8942	21.9787	22.024	22.0619	21.0821	20.9649	21.2514	0.150184	0.57529	0	38	34	37	35	38	38	26	24	24	35	38	35	37	37	38	28	24	30	4.35046e+06	3.31949e+06	4.03301e+06	3.6983e+06	4418262	4.70392e+06
Q80VA0	20	20	Galnt7	N-acetylgalactosaminyltransferase 7	17.2083	16.2804	17.8315	17.451	17.6276	17.4197	18.4116	18.203	18.2826	17.4858	17.3232	17.4538	17.591	17.4748	17.3697	18.3667	18.3937	18.6072	0.150042	0.597486	0	12	10	18	13	15	16	20	20	20	15	15	17	19	15	15	18	20	20	151430	79597.2	233254	179177	202500	175322
A0A0A0MQE8	4	4	Arhgap21	Rho GTPase-activating protein 21	13.1486	13.5199	13.158	13.6934	13.3015	13.3428	11.4622	12.0226	12.4254	13.287	13.4595	13.0047	14.139	13.682	12.8343	12.2435	11.3714	13.4018	0.149879	0.693043	0	3	3	4	4	3	3	2	2	3	3	3	3	4	3	3	3	2	4	9080.95	11746	9140.1	13247.1	10096.3	10389
Q8BH59	35	30	Slc25a12	Electrogenic aspartate/glutamate antiporter SLC25A12, mitochondrial	20.0302	19.6388	20.2023	19.8011	20.1044	19.9734	19.6673	19.6211	19.2476	19.9256	20.0718	20.1751	19.8799	20.0344	20.2574	19.6181	19.8166	19.8541	0.149652	0.228087	0	36	31	38	34	35	35	31	31	28	33	35	37	32	37	39	31	32	33	1.07078e+06	816309	1.20639e+06	913521	1.12727e+06	1.02941e+06
Q61457	4	4	Ccne1	G1/S-specific cyclin-E1	12.5807	12.7017	12.2916	12.3662	13.7592	14.5582	14.1698	14.1862	14.4715	14.691	12.9153	13.9392	13.0672	13.8698	12.9314	15.0509	12.9639	13.0031	0.149647	0.726291	0	2	2	2	2	3	4	3	4	4	4	2	3	2	3	2	4	2	2	6125.84	6661.73	5013.56	5279.5	13864.9	24123.8
F7DBQ0	17	17	Pdia6	Protein disulfide-isomerase A6	19.2849	18.6782	19.5951	19.131	19.4514	19.6145	19.7266	19.5014	19.2315	19.2958	19.4821	19.4827	19.4039	19.6061	19.4334	19.5624	19.3935	19.9002	0.1495	0.236617	0	18	14	19	19	19	19	13	13	13	19	19	19	19	19	19	13	13	15	638759	419469	791950	574140	716882	802717
Q62481	4	4	Vps72	Vacuolar protein sorting-associated protein 72 homolog	14.6841	14.8845	14.6691	14.6978	14.316	13.9036	14.8635	14.4146	13.9805	14.7929	14.1037	14.561	14.5519	13.7237	14.5819	14.9499	15.1082	15.3812	0.148972	0.481738	0	3	3	3	3	3	2	3	3	2	3	2	3	3	2	3	3	3	3	26323.3	30247.5	26051.1	26575.1	20395.4	15325.5
Q8VBT0	9	9	Tmx1	Thioredoxin-related transmembrane protein 1	17.4116	16.1705	17.6517	17.3622	17.6016	17.4635	17.7311	17.5144	17.5569	17.4943	17.2809	17.6527	17.4703	17.6781	17.4411	17.5188	17.6078	17.658	0.148701	0.37368	0	8	5	10	9	10	10	9	9	9	9	7	10	9	10	10	9	9	9	174347	73757.7	205919	168482	198890	180734
E9Q0A4	20	19	Kif21b	Kinesin-like protein KIF21B	16.0426	16.2103	15.7213	14.6017	15.6636	16.2333	17.2752	16.7953	16.3876	16.1214	16.2867	15.8412	16.2493	16.0988	15.8589	16.4617	16.4848	16.8648	0.148538	0.594956	0	12	13	13	9	13	14	20	19	18	15	14	14	16	15	12	18	18	18	67500	75819.3	54021.9	24862.9	51904.7	77038.3
P97808	5	1	Fxyd5	FXYD domain-containing ion transport regulator 5	15.53	14.4586	14.5505	15.0905	14.3196	15.3688	16.1578	16.1175	15.6624	15.3167	15.4325	15.2697	15.4043	14.8977	13.7336	16.0202	16.0048	16.5127	0.14851	0.678161	0	6	4	4	5	4	6	6	6	6	4	5	7	5	4	3	6	6	6	47314.4	22515.6	23996.4	34888.8	20447.1	42311.6
Q61466	18	15	Smarcd1	SWI/SNF-related matrix-associated actin-dependent regulator of chromatin subfamily D member 1	16.3807	16.2083	16.884	16.4918	16.6914	16.8519	17.5962	17.4664	17.3912	16.8923	16.5076	16.8476	16.7165	16.7502	16.7073	17.619	17.5634	17.6943	0.148469	0.520924	0	10	9	16	10	13	15	17	17	17	14	11	15	15	14	15	17	17	17	85324	75718	120946	92153.8	105830	118281
Q8BZR9	14	14	Ncbp3	Nuclear cap-binding protein subunit 3	16.8822	16.0999	17.1064	16.9997	17.0059	17.1489	16.4835	16.5225	16.7318	16.7828	17.1226	16.8313	16.9348	17.037	17.013	16.6988	17.1759	16.7195	0.148337	0.270474	0	10	7	12	9	11	10	8	9	8	10	11	10	10	11	10	8	9	8	120792	70234.3	141100	131041	131611	145321
E9QKG8	13	13	Hjurp	Holliday junction recognition protein	16.9941	17.0214	16.8748	16.9315	16.0451	16.2793	14.2161	15.0682	14.9663	17.0468	16.704	17.1185	17.1333	16.5393	16.4802	14.8207	14.6652	15.2237	0.148324	0.76368	0	12	12	13	13	11	11	7	9	9	13	11	14	14	12	12	9	9	8	130534	133026	120177	124997	67615.2	79533.4
Q9D0A0	3	3	Det1	DET1 homolog	8.5619	12.7777	12.4654	13.5526	13.563	8.15305	12.8317	13.039	12.8372	8.35777	9.03908	13.2413	13.1355	13.0168	13.3455	13.0094	12.8479	13.1203	0.148003	0.878463	0	1	2	2	3	3	1	3	3	3	1	1	3	2	2	3	2	3	3	377.91	7022.31	5655.33	12015	12102.6	284.65
Q8VEG6	7	7	Cnot6l	CCR4-NOT transcription complex subunit 6-like	14.0451	14.7728	14.9686	14.7195	14.6788	15.0552	14.9438	14.8813	15.0205	14.8494	14.7367	14.8229	14.9356	14.7651	15.0291	15.1668	15.0804	15.0278	0.147598	0.214843	0	4	5	7	5	6	7	6	6	6	5	6	7	7	6	6	6	6	6	16903.8	27993.9	32061.8	26977.4	26228	34045.2
O88895	8	6	Hdac3	Histone deacetylase 3	17.343	16.8364	17.2069	16.9653	17.0463	17.0601	16.7521	16.6284	16.6699	17.1547	17.27	17.3129	17.0687	17.2119	17.1447	17.001	16.8157	16.8566	0.147555	0.158942	0	7	7	8	8	7	7	8	8	8	8	7	8	7	8	8	7	8	8	166256	117018	151285	127958	135349	136645
E9Q0A7	5	5	Oxr1	Oxidation resistance protein 1	12.8833	11.1051	12.5723	10.7626	13.1812	13.1159	13.6108	13.9405	13.98	11.0961	11.1373	13.0628	13.8175	12.8439	13.9204	13.7078	13.453	13.4324	0.146585	0.785405	0	3	2	3	2	3	3	4	5	5	2	2	3	4	3	4	3	3	4	7555.5	2202.84	6090.52	1737.31	9288.36	8877.43
Q9Z2U0	15	15	Psma7	Proteasome subunit alpha type-7	19.0036	18.4073	19.6003	18.9935	19.2878	19.2492	19.8469	19.6922	19.7194	19.2291	19.1919	19.3671	19.2282	19.2295	19.3785	19.8074	19.7738	19.9131	0.146498	0.431341	0	14	12	16	14	15	15	11	12	11	15	15	15	14	14	15	12	12	11	525582	347649	794811	521923	640061	623126
Q8CEC2	5	1	Arnt	Aryl hydrocarbon receptor nuclear translocator	15.0097	14.5707	14.8895	14.6658	14.5219	14.8881	13.3763	13.8862	13.8907	15.1448	14.9573	14.8961	14.6925	14.6538	14.8105	13.6201	13.8981	14.3406	0.146108	0.571533	0	5	5	5	5	5	5	4	5	5	5	5	5	5	5	5	4	5	5	32989.3	24333.5	30351.1	25992.3	23524.4	30321.9
Q9WUB3	10	2	Pygm	Glycogen phosphorylase, muscle form	15.9351	16.192	15.9845	16.0955	15.8595	15.6589	16.2137	14.8137	15.8078	15.9256	16.1348	16.0436	15.9814	16.0103	15.9499	15.7326	15.9122	16.1848	0.146051	0.3398	0	8	9	8	9	9	8	7	6	8	8	9	9	8	10	9	9	7	8	62652.6	74867.1	64834.7	70018.9	59453.9	51736.2
Q3TYS2	9	9	Cybc1	Cytochrome b-245 chaperone 1	18.1011	18.1487	18.2826	18.1632	18.172	18.0631	18.2295	18.0472	17.7845	18.118	18.24	18.3176	18.1484	18.237	18.3366	18.1663	18.2453	18.4936	0.145679	0.0303061	0	8	8	10	9	9	10	10	10	10	9	8	10	9	9	10	10	10	10	281181	290615	318873	293538	295331	273855
Q61609	4	4	Slc20a1	Sodium-dependent phosphate transporter 1	12.4764	12.4142	12.251	12.4275	9.75744	12.4853	15.1632	14.1419	15.7394	12.8837	10.586	13.6057	10.1594	12.9583	13.0275	14.7887	14.8609	15.2969	0.145637	0.865872	0	2	2	2	2	1	2	4	3	4	2	1	3	1	2	2	3	3	4	5698.8	5458	4874.35	5508.82	865.53	5733.72
Q61165	3	3	Slc9a1	Sodium/hydrogen exchanger 1	14.1146	14.6333	14.3041	14.5745	14.5083	14.5668	15.0644	15.1767	15.0161	14.544	14.5966	14.5988	14.7429	14.6603	14.7651	14.9679	15.0033	15.3895	0.145527	0.344807	0	3	4	3	3	4	3	4	4	4	4	3	3	4	3	3	4	4	4	17738.1	25412.6	20228	24398.3	23304.8	24267.9
Q8CIG9	7	7	Fbxl8	F-box/LRR-repeat protein 8	15.3801	14.6856	15.3849	15.4795	15.1551	15.5142	15.6859	15.427	15.3686	15.5182	15.4908	15.3411	15.6023	15.488	15.4894	15.2624	15.5743	15.6224	0.145331	0.175237	0	6	4	6	7	6	6	6	6	6	7	6	7	7	6	6	5	7	6	42646	26352.4	42788.3	45688.3	36486.5	46798
Q6VGS5	13	13	Ccdc88c	Protein Daple	13.7977	10.9584	14.5032	14.2772	14.3802	14.2198	15.5651	15.4853	15.5909	14.5942	12.4176	13.869	14.3911	14.13	14.4852	15.3342	15.63	15.2335	0.145214	0.802709	0	6	3	7	7	7	7	11	11	11	8	4	6	7	6	7	10	12	10	14240.3	1989.84	23221.5	19855.4	21324.5	19080.4
B1ARD6	8	8	Slfn9	Schlafen family member 9	15.4462	14.8154	15.6151	15.2417	15.3254	15.6738	15.1763	14.8652	15.6568	15.6832	15.293	15.3664	15.2875	15.3267	15.3132	15.5365	15.696	15.6198	0.145169	0.251525	0	9	5	9	8	8	9	8	9	9	8	6	9	7	9	8	9	9	9	44643.5	28832.1	50188.3	38743.3	41060.1	52272.9
Q9DAV6	5	4	Serpinb9b	R86	13.8093	8.77863	13.4003	9.13535	11.1044	7.74618	14.7348	14.5338	14.9022	9.36827	10.1415	8.17537	9.76931	15.2739	14.1733	15.4012	14.0862	13.0618	0.145116	0.914443	0	3	0	4	1	2	1	4	4	3	1	1	1	1	5	3	4	5	2	14355.4		10811.6	562.36	2201.65	214.7
E0CXM5	5	1	Fxyd5	FXYD domain-containing ion transport regulator 5	15.5296	14.4474	14.5394	15.2704	14.3255	15.2074	16.1331	16.1051	15.6253	15.329	15.4286	15.051	15.3995	14.8939	13.6834	16.0196	16.0031	16.6783	0.144774	0.694674	0	6	4	4	6	4	5	6	6	6	4	5	6	5	4	3	6	6	6	47301	22340.2	23812.7	39522.9	20531	37835.4
P37217	3	3	Cd69	Early activation antigen CD69	8.62176	9.5092	8.30366	8.65985	9.41359	8.49541	13.6727	13.4917	14.2009	8.82091	9.60509	8.41333	9.47488	9.15363	8.88847	14.2444	13.7368	13.3336	0.144704	0.902056	0	0	1	0	1	1	0	3	3	3	1	0	1	0	1	1	3	3	3		728.71		404.46	681.98
Q91WA6	4	4	Sharpin	Sharpin	15.0507	13.5579	15.2136	14.9781	14.9583	14.8143	15.7368	15.5503	15.4744	14.9921	14.2939	15.0166	15.0547	14.8536	14.9731	15.8027	15.9164	15.7334	0.144691	0.606866	0	3	2	3	3	3	3	4	4	4	3	2	3	3	3	3	4	4	4	33939.3	12059.8	37997.6	32274.6	31833.5	28809.7
Q7TT37	24	24	Elp1	Elongator complex protein 1	17.1258	16.7313	17.3949	17.0168	17.2685	17.1181	17.3085	17.0854	17.0461	17.2844	17.2172	17.5797	17.2996	17.3647	17.4992	17.0371	17.0295	17.0851	0.144566	0.135511	0	19	14	23	20	18	17	19	18	19	21	20	23	20	20	22	19	17	17	143013	108801	172338	132612	157887	142255
D3YYK0	4	4	Abhd11	Protein ABHD11	15.5025	15.2491	15.0618	15.6667	15.635	15.465	12.4275	14.1285	12.4239	15.7983	15.1786	15.7064	13.4183	15.8151	16.0268	12.9226	13.976	14.01	0.143582	0.811695	0	4	3	3	4	4	4	2	3	2	4	3	4	2	4	4	2	3	3	46422.1	38942.7	34202.3	52015.9	50885.6	45229.7
E9PYW4	3	3	Rnf168	E3 ubiquitin-protein ligase RNF168	14.4247	15.292	14.8992	14.9092	14.9703	11.4224	14.6459	14.9431	14.9088	15.1988	15.2048	15.1128	15.3735	12.0886	14.6333	14.2836	15.0395	14.7715	0.14343	0.78499	0	2	2	3	2	2	1	3	3	2	2	2	3	3	1	2	2	3	3	21991.9	40119.2	30556.6	30769.2	32100.8	2744.72
A2BE28	18	18	Las1l	Ribosomal biogenesis protein LAS1L	17.228	16.7298	17.4797	17.1648	17.3217	17.1617	18.0943	17.7688	17.6712	17.4723	17.2568	17.4284	17.172	17.3922	17.3449	17.9586	17.892	17.9905	0.143079	0.413305	0	14	13	16	15	16	15	16	17	16	15	16	16	16	15	16	15	16	17	153515	108688	182773	146933	163813	146614
Q9QUR8	6	6	Sema7a	Semaphorin-7A	8.62176	8.77863	8.30366	8.35652	8.97386	8.49541	12.9522	13.4858	14.7844	9.08562	9.60509	9.19679	9.41752	9.52537	9.38718	15.0442	13.096	9.68208	0.143064	0.900376	0	0	0	0	0	0	0	4	6	7	0	0	0	1	0	0	7	4	0
P07742	40	40	Rrm1	Ribonucleoside-diphosphate reductase large subunit	20.286	20.0224	20.204	20.1182	20.0057	20.4666	20.027	19.7972	20.0406	20.2586	20.2444	20.2524	20.3884	20.1489	20.1381	20.14	20.3511	20.3314	0.142857	0.062335	0	41	35	41	42	41	46	35	34	36	41	42	43	43	41	42	36	40	37	1.27852e+06	1.06499e+06	1207804	1.13811e+06	1.05272e+06	1.44893e+06
F7CC56	9	9	Rb1cc1	RB1-inducible coiled-coil protein 1	15.0766	15.3992	14.7279	15.0432	11.2442	15.1736	15.0788	15.2395	14.9136	14.8246	14.8862	14.8492	15.0334	15.0673	14.5763	14.8714	14.6277	14.4442	0.142662	0.748102	0	7	7	7	8	3	8	8	9	8	6	6	8	7	7	6	9	9	9	34554.6	43214	27135.4	33762.9	2425.65	36958.3
Q9D8V0	11	11	Hm13	Minor histocompatibility antigen H13	17.6433	17.2832	18.291	17.9726	18.3912	18.5457	19.5647	19.5286	19.1771	18.0265	18.5261	18.324	18.1532	18.1567	18.4355	19.1185	19.463	19.476	0.142456	0.671037	0	7	7	7	8	10	8	10	10	10	7	9	8	7	8	8	8	10	11	204718	159499	320726	257211	343800	382648
A2AH22	13	13	Ambra1	Activating molecule in BECN1-regulated autophagy protein 1	15.8543	15.6878	14.6707	15.7729	15.734	15.8521	15.6818	16.1133	16.191	15.8198	15.9441	15.7098	15.8249	15.6984	15.6138	16.1225	16.2032	15.9028	0.142393	0.384303	0	10	9	7	10	11	10	12	14	13	10	10	10	10	8	9	13	13	13	59239.7	52782.3	26081.3	55989	54501.4	59150.9
P83917	10	8	Cbx1	Chromobox protein homolog 1	17.2384	17.17	17.2753	17.258	17.211	17.3537	16.9419	17.1706	17.1654	17.3786	17.0526	17.5756	17.3712	17.3522	17.2984	17.0493	17.4069	17.5792	0.142201	0.0720631	0	9	9	10	10	9	10	6	7	7	9	9	10	10	10	9	7	7	7	154620	147465	158629	156743	151714	167487
P58069	9	9	Rasa2	Ras GTPase-activating protein 2	15.508	14.7478	15.6397	15.5552	15.8114	15.434	15.5667	15.5431	15.3237	15.295	15.7614	15.4325	15.9392	15.7598	16.0818	15.9124	15.1613	15.0639	0.141968	0.383738	0	7	5	8	7	8	7	9	9	8	7	8	7	8	8	8	9	8	8	46599.6	27512.6	51054.4	48148.9	57504.5	44269.7
E9Q6Z3	6	6	Nemp1	Nuclear envelope integral membrane protein 1	15.9773	15.9701	16.07	15.9117	15.8921	15.7951	14.9227	14.7983	14.5212	15.9105	15.9708	16.1553	15.9504	15.8243	15.9975	14.8477	15.0482	15.4304	0.141832	0.585132	0	4	4	5	5	4	4	4	6	4	5	4	5	4	4	4	4	4	5	64511.4	64189.8	68795.6	61646.5	60813.9	56859.3
A0A0R4J2D8	4	4	Slamf7	SLAM family member 7	13.5662	12.2611	14.2981	14.125	14.2136	14.6059	14.3724	14.6732	15.5244	14.6106	15.1092	14.2241	15.0449	14.6746	13.3753	15.1583	13.5258	13.1919	0.141669	0.724288	0	3	2	4	3	3	4	3	4	5	4	4	4	5	4	2	4	3	3	12128.8	4908.48	20143.9	17867.1	18997.9	24935.1
E9QNR7	6	6	Zc3h12d	Zinc finger CCCH type containing 12D	14.8674	14.6777	14.034	14.8155	14.4984	14.2384	12.7497	11.1438	11.4429	15.0724	14.9916	14.5509	15.0197	14.207	14.6474	10.1094	12.4094	12.7329	0.141439	0.851332	0	5	5	4	6	5	4	4	3	3	6	5	6	6	5	6	2	4	4	29890.6	26207.6	16774.3	28833.9	23145.1	19328
O08547	11	11	Sec22b	Vesicle-trafficking protein SEC22b	17.7272	17.5817	18.0697	17.9796	17.8924	18.0445	18.8307	18.4809	18.3684	17.9025	17.8595	18.0516	18.012	18.0622	18.1361	18.6615	18.7411	18.8203	0.141299	0.447724	0	10	7	10	10	9	10	8	8	8	9	10	10	10	10	11	8	8	8	216976	196158	275120	258467	243310	270347
E9Q236	7	7	Abcc4	ATP-binding cassette sub-family C member 4	15.4026	14.0071	15.566	15.0778	15.3972	15.4992	15.307	15.0369	15.6917	15.6081	14.3221	15.0133	15.1988	15.9405	15.0916	15.7224	15.6706	15.6871	0.141012	0.560266	0	5	3	6	4	4	5	6	5	7	6	3	4	5	6	4	7	7	7	43316.1	16464.8	48511.1	34584.8	43152.7	46315.3
P61358	10	10	Rpl27	60S ribosomal protein L27	20.4277	20.0703	20.3047	20.229	20.4231	20.4895	19.9952	19.5488	19.9578	20.3593	20.4782	20.2731	20.2653	20.4861	20.4174	20.1286	20.0175	20.2873	0.140735	0.231007	0	13	13	14	13	14	14	9	10	9	13	13	14	13	14	14	10	9	13	1.41047e+06	1.10092e+06	1.29515e+06	1.22898e+06	1405914	1472189
Q8CHG5	3	3	Arel1	Apoptosis-resistant E3 ubiquitin protein ligase 1	12.6122	11.691	8.30378	12.6006	11.8222	12.4235	11.8779	12.1191	11.5906	12.1898	11.8169	11.8374	11.2942	11.8316	11.9887	11.7107	11.8356	11.8019	0.140652	0.757051	0	3	2	1	3	2	2	3	3	2	2	2	3	2	2	2	3	3	3	6261.03	3306.36	316	6210.81	3621.11	5493.45
Q9CQJ6	5	5	Denr	Density-regulated protein	15.7234	15.2891	15.9432	15.179	15.9719	15.7623	17.3295	16.4374	16.8843	16.5819	15.0417	16.0478	16.244	15.3836	15.499	17.3361	17.0515	16.5998	0.140564	0.694156	0	4	3	3	3	4	4	4	4	4	5	3	4	4	3	3	4	4	3	54102.7	40038.7	63004.5	37097.5	64271.7	55579.5
P10518	19	19	Alad	Delta-aminolevulinic acid dehydratase	17.5219	17.4664	17.2526	17.2129	17.2689	17.2825	14.9795	15.6326	15.3969	17.3009	17.4252	17.5243	17.3792	17.2702	17.4002	15.7624	15.436	15.7804	0.140485	0.757005	0	13	15	16	15	15	15	10	11	12	14	14	17	15	15	17	12	12	13	188204	181096	156154	151918	157926	159425
Q9D136	5	5	Ogfod3	2-oxoglutarate and iron-dependent oxygenase domain-containing protein 3	15.6914	15.7651	15.7565	15.6216	15.3899	15.5274	15.4063	15.0485	15.0985	15.8317	15.9224	15.922	15.7873	15.7034	15.501	14.8752	15.2392	15.7871	0.140459	0.356293	0	6	6	6	7	6	7	6	6	6	6	7	6	7	7	6	5	7	7	52915.4	55687.6	55358.9	50415.9	42934.6	47230
Q8BYP3	4	4	Rhof	Rho-related GTP-binding protein RhoF	13.8067	13.6462	14.1476	13.8914	14.1635	13.9506	14.8022	14.5023	14.4165	14.0996	14.052	14.3514	13.958	14.0997	13.929	14.5062	14.4065	15.1839	0.139899	0.44826	0	2	2	3	3	3	3	4	3	4	2	3	3	3	3	3	3	4	4	14329.8	12820.7	18149.3	15195.9	18350.5	15832.4
A0A0G2JDP0	7	7	Hax1	HCLS1-associated protein X-1	15.0001	13.5454	15.0739	15.1292	15.6693	14.7992	15.1861	15.3031	15.4593	14.6906	15.4017	15.6671	14.8679	15.0439	15.3041	14.6383	15.3926	15.4179	0.139833	0.561727	0	6	4	7	7	10	7	7	8	7	5	8	9	7	6	9	5	7	7	32770.1	11955.5	34489.4	35837.2	52109.4	28511.1
E9QMR2	8	4	Dock9	Dedicator of cytokinesis protein 9	14.482	13.5542	15.3214	14.2826	14.6777	14.1265	15.759	15.3457	15.8506	14.3886	13.4803	14.6868	14.8512	15.2188	14.9418	16.4003	15.4415	15.2471	0.139639	0.713308	0	4	3	7	4	5	4	6	6	7	4	3	5	5	5	5	7	7	6	22883.6	12028.5	40945.4	19929.9	26206.8	17885.5
Q91VC9	5	5	Ghitm	Growth hormone-inducible transmembrane protein	15.3732	15.147	16.0391	15.5715	15.4735	15.5813	15.9073	15.3619	15.6176	15.3965	15.3632	15.7976	15.3863	15.773	15.8733	15.9734	15.8648	15.8979	0.139261	0.275651	0	3	3	5	3	3	4	4	3	4	3	3	4	3	4	4	4	4	4	42442.7	36283.8	67337.4	48695.8	45499.1	49029
E9QLT6	5	1	Arnt	Aryl hydrocarbon receptor nuclear translocator	15.504	15.0505	15.3675	15.1177	14.9811	15.337	13.8202	14.3714	14.2897	15.5913	15.3541	15.3595	15.1471	15.1122	15.281	14.1586	14.3508	14.7375	0.139241	0.588363	0	5	5	5	5	5	5	4	5	5	5	5	5	5	5	5	4	5	5	46468.4	33934.4	42273.4	35554	32342.4	41390.2
Q8K2Y9	16	16	Ccm2	Cerebral cavernous malformations protein 2 homolog	16.6465	16.7588	16.7828	17.0523	16.7973	17.0217	16.7137	16.4447	16.5858	16.6638	16.6265	16.8705	17.0327	16.7241	16.8226	16.6805	17.2529	17.3807	0.138949	0.229384	0	15	14	17	16	15	17	15	13	15	15	12	18	16	16	15	16	16	16	102586	110892	112754	135912	113890	133059
Q6ZWV3	26	26	Rpl10	60S ribosomal protein L10	21.9437	21.248	21.7627	21.6346	21.9806	21.9155	19.5697	19.6279	19.4991	21.8726	21.9841	21.6978	21.8555	21.9502	21.9515	19.7617	19.5309	19.827	0.138828	0.793115	0	29	24	29	29	29	27	19	16	17	28	29	28	29	29	29	20	18	21	4.03385e+06	2.49052e+06	3.55825e+06	3.25585e+06	4.13822e+06	3.95562e+06
P70419	4	2	Galnt3	Polypeptide N-acetylgalactosaminyltransferase 6	8.76878	8.95887	11.0364	11.3111	11.4665	11.4787	14.5476	14.9806	15.2599	9.13704	9.61453	12.2442	12.5332	12.4265	9.52789	15.1517	14.8402	13.5781	0.138308	0.902296	0	1	1	2	2	2	2	3	4	4	1	1	2	2	2	1	3	4	3	436.18	497.61	2100.33	2540.93	2829.82	2853.94
Q8CE33	5	5	Klhl11	Kelch-like protein 11	13.4798	11.7179	13.2517	13.582	13.7497	13.9745	12.9818	13.7805	14.0508	14.1226	12.0623	13.8427	13.4612	13.6494	13.6601	13.7365	13.9102	13.368	0.138266	0.662006	0	3	2	3	3	3	4	3	5	5	5	2	4	3	3	3	5	5	5	11423.9	3368.52	9753.48	12262.5	13774.8	16096.4
Q9R1P1	16	16	Psmb3	Proteasome subunit beta type-3	17.6621	17.3083	17.9274	17.4828	17.8328	18.0593	17.8762	17.7389	17.7771	17.6843	17.9031	17.7912	17.9003	17.8702	17.8092	17.9616	17.8746	18.1137	0.138164	0.129438	0	16	13	17	15	14	15	16	15	16	17	15	17	17	15	16	14	14	16	207404	162298	249271	183163	233451	273142
Q9CY16	6	6	Mrps28	28S ribosomal protein S28, mitochondrial	15.8201	15.2813	16.3815	15.935	15.8929	16.14	15.3898	16.0215	15.479	15.5729	15.8983	16.0619	16.1329	16.2265	16.0509	15.6308	15.7628	16.2473	0.138122	0.363651	0	4	3	5	4	4	5	4	4	4	3	4	4	5	4	4	4	4	5	57852.1	39821.4	85375.4	62648.7	60846.4	72216.9
P53986	9	9	Slc16a1	Monocarboxylate transporter 1	17.6589	17.4374	18.2567	18.1037	18.2884	18.2477	17.5109	17.6671	17.6983	17.8808	18.0418	18.1551	17.9972	18.4197	18.6829	17.7743	17.4895	17.6695	0.137959	0.426139	0	8	8	10	10	9	10	7	7	7	9	9	9	10	10	10	7	7	7	206952	177493	313202	281676	320154	311245
Q99K85	26	26	Psat1	Phosphoserine aminotransferase	20.193	19.8027	20.4702	20.2553	20.6163	20.4909	20.5766	20.2535	20.3334	20.1876	20.2421	20.4814	20.4418	20.5909	20.5557	20.5025	20.4216	20.8049	0.137387	0.201691	0	26	21	26	25	28	29	22	21	22	24	25	29	28	28	27	23	22	24	1.19868e+06	914573	1.45264e+06	1.25157e+06	1.60736e+06	1.47354e+06
F8VQ29	12	8	Iqgap3	IQ motif containing GTPase activating protein 3	15.997	16.1134	16.2952	16.0482	15.5065	16.1848	15.8886	15.4485	15.6623	16.2818	16.1744	16.1196	16.3201	16.2113	15.9972	15.6936	15.8036	15.7788	0.137324	0.296515	0	9	9	11	9	9	12	10	10	11	10	11	12	12	12	11	9	9	10	65400.8	70893.8	80417.2	67762.4	46550	74494.2
Q07235	11	11	Serpine2	Glia-derived nexin	13.2247	12.991	12.7207	13.057	14.3519	14.2247	17.4654	17.1686	16.6413	12.7522	14.5689	12.05	14.4034	15.5644	14.5119	17.4075	16.4367	15.3859	0.137263	0.873711	0	6	5	6	6	8	7	13	13	13	6	7	5	8	10	8	13	13	12	9572.38	8141.14	6750.29	8522.29	20910.4	19145.4
Q5NCY0	3	3	Kdm6b	Lysine-specific demethylase 6B	12.286	12.6048	12.537	12.7405	12.4818	12.2715	11.4297	11.9111	12.1791	12.5128	12.4348	12.6213	11.8869	12.4011	12.4928	12.7116	12.3449	12.2701	0.137185	0.391133	0	2	2	2	3	3	3	3	3	2	3	2	3	2	3	2	3	3	3	4994.08	6229.04	5942.99	6843.32	5720.16	4944.09
P62242	15	15	Rps8	40S ribosomal protein S8	19.741	19.5737	19.7988	19.4048	19.707	19.5466	19.2642	19.0711	19.2294	19.7759	19.9067	19.7488	19.6742	19.7314	19.7346	19.0403	19.3439	19.6149	0.137137	0.279484	0	17	14	17	15	16	17	11	11	11	16	16	16	17	16	16	11	11	11	876276	780291	912106	694090	855825	765797
P35979	9	9	Rpl12	60S ribosomal protein L12	19.4383	19.3906	19.7325	19.2953	19.6291	19.533	19.4045	18.8207	19.2369	19.5515	19.5243	19.4477	19.5727	19.5277	19.6758	19.3604	19.4785	19.5765	0.137132	0.158063	0	9	9	10	9	9	10	8	8	8	9	10	9	11	11	10	8	8	9	710432	687286	871093	643388	810886	758599
Q9CXE7	10	10	Tmed5	Transmembrane emp24 domain-containing protein 5	17.1292	17.2515	18.0174	17.4117	17.4572	17.6076	19.3513	19.0351	19.0388	17.9694	17.5962	17.4977	17.4363	17.4821	17.488	19.4028	19.2825	19.3786	0.137083	0.74736	0	7	5	9	7	7	8	9	9	9	9	8	7	7	7	8	9	9	9	143350	156038	265324	174358	179941	199711
I1E4X1	9	9	Stx5a	Syntaxin-5	13.3266	13.2427	15.4144	15.6038	14.9966	13.286	15.6185	16.3178	16.2504	14.6026	15.0176	14.2087	14.1646	14.4856	14.4061	15.4934	16.5424	16.3696	0.13708	0.795778	0	3	3	6	6	5	3	6	8	7	5	5	4	4	4	4	5	7	7	10273	9692.74	43672.1	49799.6	32690.6	9988.46
A2ADH1	11	11	Magt1	Magnesium transporter protein 1	16.466	15.9607	17.1276	17.1129	17.0884	17.2656	17.6801	17.5666	17.4543	16.8757	16.7789	17.0475	16.9457	17.0908	17.1842	17.5136	17.737	17.7816	0.136977	0.543723	0	7	6	10	9	10	10	10	10	10	8	7	11	8	8	10	10	10	10	90522.8	63773.5	143192	141744	139354	157568
Q9R0T8	9	8	Ikbke	Inhibitor of nuclear factor kappa-B kinase subunit epsilon	15.6244	14.3007	15.8503	15.924	15.4212	15.5	16.3746	16.2532	16.1505	15.7914	15.6704	15.695	15.6281	15.5473	15.6271	16.1614	16.1693	16.3416	0.136968	0.559793	0	6	5	9	9	6	7	10	10	10	7	7	8	7	8	8	10	10	10	50514.4	20181	59075.4	62173.7	43879	46340.3
E9Q507	9	9	Gon4l	GON-4-like protein	15.1281	14.9656	14.6328	14.9297	13.2937	14.8125	15.5124	15.4422	15.5575	14.951	15.2052	14.7855	15.0998	14.7424	14.6616	15.3142	15.4728	15.273	0.136762	0.59042	0	6	5	6	7	4	6	8	9	9	7	7	7	7	6	7	8	9	9	35810.6	31996.3	25403.9	31209.7	10041.7	28773.9
Q8K4Z3	3	3	Naxe	NAD(P)H-hydrate epimerase	16.2302	16.007	16.5802	16.2136	16.4024	16.4824	16.7517	16.3091	16.2843	16.3954	16.6727	16.4741	16.6102	16.2237	16.3953	16.4058	16.5501	16.7642	0.136707	0.157539	0	3	3	3	3	3	3	3	3	3	3	3	3	3	3	3	3	3	3	76875.9	65856.2	97982.9	75996.1	86620.3	91560.5
Q9Z0F0	3	3	B3galt4	Beta-1,3-galactosyltransferase 4	13.4917	13.0532	13.0096	12.7651	9.35709	12.7471	13.4854	13.6004	13.7394	13.5357	13.629	8.70988	13.1042	13.6683	12.7264	13.8043	13.6205	13.6806	0.136637	0.848209	0	3	2	2	2	1	2	2	3	3	3	3	1	2	3	2	3	3	3	11518.9	8499.76	8246.97	6961.03	655.79	6874.99
D3YXZ3	7	4	Klc2	Kinesin light chain	15.0615	14.5328	15.7633	15.7945	15.7233	15.5845	16.4079	16.2996	16.3592	15.5819	15.2521	15.8618	15.6404	15.6107	15.6709	16.4654	16.2883	16.3845	0.136591	0.59253	0	5	5	7	7	8	7	9	9	9	7	6	7	7	7	7	9	9	9	34195.6	23703.5	55618	56835.8	54097.7	49137.4
O70572	4	4	Smpd2	Sphingomyelin phosphodiesterase 2	14.4322	14.3152	14.7558	14.726	14.5353	12.5009	14.7467	14.1975	14.6538	14.4066	15.0604	14.0898	14.7679	14.2599	13.3804	14.7637	14.6687	14.6924	0.136272	0.643852	0	3	3	4	4	4	2	4	3	4	3	4	3	4	3	2	4	4	4	22106.7	20384.3	27665.9	27100	23744.6	5796.14
Q8C4B4	8	7	Unc119b	Protein unc-119 homolog B	16.1073	15.7576	16.5338	16.3455	16.023	16.6102	16.8424	16.218	16.4428	16.7182	15.9982	16.7556	16.5592	16.1191	16.5919	15.9292	16.4886	16.9468	0.136265	0.414966	0	5	5	7	6	6	7	7	6	7	8	6	8	8	6	8	6	7	6	70596.7	55399.3	94879.7	83271.3	66590.9	100036
D3Z1V4	11	11	Pebp1	Phosphatidylethanolamine-binding protein 1	18.6499	18.6747	19.1619	18.8385	18.6739	18.822	19.46	18.794	18.7843	18.6865	18.7364	19.0157	18.8258	18.7492	18.7338	19.138	19.4192	19.7799	0.136156	0.389928	0	11	12	12	11	11	12	11	11	12	13	11	12	12	12	11	12	12	12	411333	418438	586551	468778	418212	463422
A0A286YDA2	21	21	Nolc1	Nucleolar and coiled-body phosphoprotein 1	19.0502	18.3662	19.2846	19.1255	19.3768	19.2704	19.108	18.9489	19.2391	19.2447	19.0939	19.3063	19.0941	19.3294	19.4278	19.1953	19.1307	19.1721	0.136037	0.222614	0	17	12	19	19	20	18	14	14	15	16	18	20	18	19	21	15	15	15	542866	337891	638640	571928	680771	632351
Q91XF0	5	5	Pnpo	Pyridoxine-5'-phosphate oxidase	11.907	14.0526	15.0697	14.9364	14.2704	15.026	15.9862	15.9999	15.9997	14.3503	13.9497	15.0581	14.9929	13.9418	14.284	15.8939	15.9979	16.0009	0.135726	0.797892	0	2	3	5	4	3	4	5	5	5	3	3	5	4	3	4	5	5	5	3840.39	16992.6	34389.4	31355.2	19761.2	33362.8
A0A0A6YVU8	5	5	Adrm1b	Proteasomal ubiquitin receptor ADRM1	17.2578	16.7087	17.1328	16.0354	17.2587	17.194	16.9912	17.2243	17.1491	16.9586	17.4872	17.0026	17.1795	17.4008	17.3542	16.8585	17.077	16.8536	0.135557	0.39458	0	5	3	4	4	4	5	5	5	5	3	5	4	4	5	5	3	5	5	156717	107105	143711	67163.9	156816	149932
P30285	11	10	Cdk4	Cyclin-dependent kinase 4	18.0137	17.1703	17.8832	17.9568	17.4516	18.1549	17.2357	17.4484	17.9642	17.7978	18.0894	18.1111	18.0745	17.7299	17.493	17.8322	17.8119	17.5589	0.135542	0.361714	0	11	8	12	13	13	13	12	12	13	11	12	14	13	13	12	14	13	13	264647	147492	241755	254418	179244	291855
A0A0R4J250	4	4	Ei24	Etoposide-induced protein 2.4	14.1577	13.4486	14.3019	13.78	13.9298	14.1829	14.4776	14.3262	14.3074	13.8359	14.5625	14.2182	14.0019	14.2656	14.1663	14.4877	14.227	14.3651	0.135349	0.319788	0	4	3	4	3	4	4	4	4	4	4	4	4	4	4	4	4	4	3	18276.3	11179.6	20197.7	14067.1	15606	18598
Q9R1P0	12	12	Psma4	Proteasome subunit alpha type-4	18.6851	18.4876	18.5952	18.5231	18.6875	18.5885	18.0306	17.3927	17.2762	18.6109	18.6663	18.7926	18.579	18.6759	18.7488	17.7956	17.5773	18.0379	0.135328	0.580697	0	11	12	12	11	12	12	11	10	9	11	11	12	11	12	12	12	10	11	421483	367555	396023	376708	422188	394171
Q9CPU0	11	11	Glo1	Lactoylglutathione lyase	18.6912	18.0637	18.8536	18.7205	18.539	18.6301	18.1567	17.941	17.868	18.6048	18.455	18.7811	18.7854	18.7111	18.6917	18.0196	18.3504	18.2821	0.135263	0.389158	0	8	7	10	9	9	10	8	8	7	9	9	10	10	10	11	8	9	8	423277	273981	473693	431946	380878	405701
P48962	29	11	Slc25a4	ADP/ATP translocase 1	20.9912	20.2983	20.9357	20.7911	20.996	21.0496	19.5035	19.0462	19.2723	20.717	21.1187	20.9837	20.8535	21.117	21.1403	19.2531	19.4272	19.4895	0.135113	0.730746	0	26	25	30	29	29	31	23	21	23	26	29	30	27	30	29	22	23	23	2.08443e+06	1.28942e+06	2005805	1.81444e+06	2.09129e+06	2.17053e+06
P17879	12	4	Hspa1b	Heat shock 70 kDa protein 1B	21.3181	20.9311	20.9599	21.1351	21.1903	21.3124	20.9143	20.8178	20.9997	21.3791	21.4229	21.4994	21.1639	20.9217	21.0941	21.1549	21.0032	21.1548	0.135022	0.147668	0	11	10	8	10	11	10	9	9	9	9	11	10	10	10	9	8	10	10	2.61448e+06	1.99934e+06	2039617	2.30303e+06	2.39278e+06	2.60425e+06
Q9WTU0	11	10	Phf2	Lysine-specific demethylase PHF2	15.8492	15.5086	15.879	16.1962	15.7572	15.9633	15.8502	15.0512	15.1498	16.0234	15.8233	15.977	15.9445	15.9302	15.9476	15.2074	15.6884	15.878	0.135015	0.38716	0	8	6	7	10	8	9	8	6	8	9	8	9	9	9	9	8	9	9	59029.7	46616.6	60263.4	75082.4	55384.3	63887.7
A0A0G2JE26	3	3	Antxr2	Anthrax toxin receptor 2	8.57255	13.2608	13.1304	13.1998	12.9618	13.0223	14.026	13.9415	13.6025	13.2217	12.8117	12.8986	12.9544	10.169	13.2875	13.8159	13.8763	13.8969	0.134943	0.842821	0	1	2	2	2	2	2	3	3	2	2	2	2	2	1	2	3	3	3	380.71	9815.44	8966.75	9408.82	7978.12	8319.38
Q9D6Y9	16	16	Gbe1	1,4-alpha-glucan-branching enzyme	17.8648	17.8274	17.1893	17.5297	16.9945	17.1506	16.1704	15.9599	14.6156	17.317	17.5768	17.4024	17.5886	17.2984	17.528	15.9585	15.7671	16.0788	0.134839	0.760745	0	18	16	16	16	14	17	15	12	9	16	17	18	18	16	18	13	12	13	238691	232582	149452	189215	130573	145493
Q9EQ61	13	13	Pes1	Pescadillo homolog	17.5852	17.7705	18.0174	17.7723	17.9335	17.7801	18.4252	18.177	18.4306	17.7679	18.1105	17.8217	17.7157	18.0144	17.9343	18.6753	18.5067	18.556	0.134509	0.406963	0	9	12	14	11	12	12	12	12	12	12	12	11	11	13	14	12	12	12	196639	223586	265329	223871	250343	225078
Q99JY3	34	34	Gimap4	GTPase IMAP family member 4	20.711	20.1096	20.8461	20.5675	20.8116	20.4272	20.8479	20.7545	20.3869	20.8831	20.8924	20.698	20.7035	20.7378	20.8627	20.709	20.3091	20.8771	0.134475	0.216585	0	36	25	38	35	37	36	32	30	31	37	37	35	35	37	38	31	32	34	1716508	1131311	1.88493e+06	1.55399e+06	1.84047e+06	1.40996e+06
P24369	22	22	Ppib	Peptidyl-prolyl cis-trans isomerase B	19.2926	19.1004	19.3087	19.14	19.3749	19.432	19.4966	19.169	18.9745	19.2705	19.3646	19.1871	19.2928	19.4833	19.2106	19.3091	19.4598	19.9206	0.134413	0.170311	0	25	22	24	23	25	25	21	18	19	23	24	24	25	26	24	19	22	22	642163	562085	649375	577707	679876	707307
Q5SVT2	13	13	Trim16	Tripartite motif-containing protein 16	15.235	14.3444	15.0764	14.3893	15.1148	14.6369	17.1864	16.3931	16.2928	15.0797	14.391	14.8669	14.8893	14.9558	14.8785	16.3809	17.1485	17.2853	0.134069	0.788753	0	8	6	8	6	7	7	12	12	11	8	6	7	8	7	8	10	13	11	38565.7	20801.7	34550.4	21458.8	35482.7	25477.6
Q5SXJ3	9	9	Brip1	Fanconi anemia group J protein homolog	14.9575	14.7042	15.0943	12.5267	14.9883	15.2522	14.0785	14.9294	14.3233	15.3436	13.5856	14.767	14.8991	14.6951	14.7269	14.7914	14.8448	14.4049	0.133771	0.683883	0	7	6	8	4	8	8	7	8	7	8	4	7	6	6	6	8	8	7	31816.9	26693	34980.4	5900.63	32503.2	39027
G5E897	4	4	Poglut3	Protein O-glucosyltransferase 3	12.3604	11.2159	13.0113	13.074	12.425	12.4229	12.2443	12.738	10.6521	12.7221	11.6945	13.0642	12.5014	13.0256	12.4472	12.0587	11.8889	11.944	0.133645	0.678527	0	3	2	4	4	3	3	4	4	2	4	2	4	3	4	3	3	3	3	5258.42	2378.61	8256.35	8623.14	5499.11	5491
Q7TNV0	22	22	Dek	Protein DEK	18.9412	18.673	18.9708	18.6067	18.7633	19.0495	19.0617	18.9135	18.8098	19.0699	19.012	18.9294	18.9064	18.7705	18.9411	18.899	19.1729	19.29	0.133521	0.0952063	0	21	20	20	20	20	22	18	17	15	20	21	21	20	21	22	16	16	17	503366	417945	513781	399191	444960	542602
Q99LG0	12	12	Usp16	Ubiquitin carboxyl-terminal hydrolase 16	15.0241	15.0661	14.6028	15.1877	15.2296	14.9159	15.614	15.5901	15.6912	15.2125	14.9884	15.0902	15.0222	15.1367	15.4369	15.8103	15.5304	15.8935	0.133287	0.431935	0	8	8	6	10	9	8	10	9	9	8	9	9	9	9	10	11	8	12	33319.3	34303.5	24881.6	37321.3	38419.8	30913.3
Q8BV13	7	7	Cops7b	COP9 signalosome complex subunit 7b	16.8056	16.3002	16.5647	16.7643	16.8914	16.8555	16.6108	16.5219	16.5726	16.8432	16.5266	16.9487	16.7898	16.9485	16.9145	16.741	16.7495	16.6249	0.13328	0.115032	0	7	6	6	7	7	7	7	7	8	7	6	7	7	7	7	8	7	7	114549	80693.9	96931.6	111318	121566	118582
Q3U1J4	58	58	Ddb1	DNA damage-binding protein 1	19.4652	19.188	19.6743	19.4943	19.5309	19.5298	19.5041	19.3163	19.392	19.5302	19.5795	19.7789	19.6568	19.5861	19.5833	19.4056	19.4352	19.7351	0.132871	0.0492773	0	48	47	56	49	57	55	53	49	52	51	51	59	57	55	55	52	48	55	723793	597280	836685	738512	757525	756937
Q80SX0	8	8	Stard4	StAR-related lipid transfer protein 4	15.2448	15.2014	15.3068	14.733	14.6795	15.5099	14.7928	14.7953	14.909	15.2374	15.2932	15.3471	15.3518	15.3739	15.1968	14.9856	14.9074	14.6742	0.132766	0.317229	0	8	6	8	6	7	8	6	6	7	7	7	8	8	8	8	6	6	6	38828.5	37677.4	40532.7	27231.8	26241.2	46658.7
Q921I9	8	8	Exosc4	Exosome complex component RRP41	16.6286	16.2024	17.1184	16.6454	17.0876	16.811	16.6724	16.9628	16.6688	16.8422	17.0206	17.1483	16.861	17.0416	16.9365	16.6732	16.5668	16.9017	0.1327	0.252658	0	5	4	8	7	7	6	6	8	6	7	7	8	7	8	7	6	6	8	101321	75404.2	142284	102511	139280	114976
F6U5V1	5	5	Larp1b	La ribonucleoprotein domain family, member 1B	8.21053	8.13437	12.7128	14.1767	11.4429	10.8281	11.8878	15.2039	13.6938	11.2592	11.778	13.9154	11.4747	9.10829	9.46581	14.1359	13.9369	12.4095	0.132539	0.899508	0	1	1	3	4	2	2	2	4	3	2	2	3	2	1	1	3	3	2	296.22	280.99	6713.23	18518.8	2783.85	1817.98
B2M1R7	18	12	Pcbp2	Poly(rC)-binding protein 2	20.3702	20.0448	20.848	20.47	20.6881	20.6199	20.4094	20.1822	20.4499	20.8327	20.688	20.6007	20.6263	20.5968	20.7151	20.4879	20.4808	20.2468	0.132529	0.20183	0	17	15	19	17	19	18	16	16	17	19	18	18	20	19	19	17	17	17	1.35529e+06	1.08163e+06	1.88743e+06	1.4524e+06	1.68937e+06	1.61139e+06
Q60865	19	19	Caprin1	Caprin-1	18.5827	18.3746	18.7899	18.5467	18.4649	18.6751	18.7321	18.5402	18.9745	18.8244	18.5011	18.7398	18.7293	18.4339	18.6636	18.8253	18.9821	19.1733	0.132448	0.191463	0	15	14	16	14	14	15	12	12	13	15	16	16	17	15	16	13	13	15	392602	339869	453235	382924	361828	418572
Q9Z204	22	22	Hnrnpc	Heterogeneous nuclear ribonucleoproteins C1/C2	19.4441	19.505	19.886	19.5323	19.837	19.4737	20.4293	19.8274	20.0979	19.613	19.6273	19.7582	19.7119	19.5437	19.6433	20.2378	20.3927	20.6965	0.13243	0.467316	0	17	18	20	18	20	17	17	15	18	18	17	21	18	18	20	17	17	18	713259	744026	968888	758225	936524	728062
Q99KP3	4	4	Cryl1	Lambda-crystallin homolog	15.5926	15.3145	15.3397	15.4138	14.7905	15.1343	14.7082	14.8365	14.6524	15.2674	15.2447	15.2214	15.3577	14.9967	14.9682	14.8368	15.586	15.4945	0.132316	0.365713	0	4	4	4	4	4	4	4	4	4	4	4	4	5	4	4	4	5	5	49412.5	40750.6	41467.1	43654.3	28339.2	35965.6
Q60931	13	13	Vdac3	Voltage-dependent anion-selective channel protein 3	16.97	16.482	17.3504	16.7204	17.1427	17.0751	17.3895	17.0169	16.9573	16.7136	17.3362	17.0265	16.9913	17.2287	17.1136	17.239	17.0575	17.5868	0.132098	0.307081	0	13	8	13	10	12	12	9	9	8	10	13	11	12	13	12	9	10	10	128375	91533.1	167106	107980	144695	138077
O70400	22	22	Pdlim1	PDZ and LIM domain protein 1	19.7432	19.507	19.8832	19.5919	19.7606	19.666	19.1545	19.1412	18.8122	19.9284	19.665	19.6319	19.848	19.7491	19.5967	19.1001	19.4755	19.4504	0.131726	0.37639	0	19	17	24	20	21	21	18	19	18	22	18	22	23	23	20	19	20	20	877589	745038	967007	790237	888233	831844
Q3U5V8	7	7	Stx11	Syntaxin-11	16.0278	14.0762	16.3068	15.6825	15.9061	16.1909	16.8375	16.4057	16.1969	15.892	15.1623	15.807	15.9567	16.1131	16.0015	16.2492	16.5521	17.0804	0.131519	0.680011	0	7	4	8	5	6	7	7	7	7	6	4	6	7	6	7	6	7	7	66812.8	17273.1	81064.2	52590.2	61408.2	74809.9
[truncated: 6,758 more rows]
[truncated: 12 more columns]

## Sheet: column headers
Column header	Details	Name of the raw MS file in the dataset
accession	Accession number of the protein identified from Uniprot
[truncated: 61 more rows]
