# Supplementary material for: Fine-Tuning Levels of Filamins A and B as a Specific Mechanism Sustaining Th2 Lymphocyte Functions
Source: Research Square preprint supplement (doi:10.21203/rs.3.rs-3878460/v1), 2024-03-15
Supplement: Supplementary file 2 [file 507f624e4ac4c009ac64ff3a.xlsx]

## Sheet: Sample sizes
Supplementary Table 4
Figure 1
		D0	D1	D2	D3	D4	D5	D6
1a	n=	14	6	6	14	11	9	14
		ctrl	cKO
1b	n=	28	32
1c	n=	9	9
1d	n=	9	9
1e	n=	22	21
1g	n=	8
		Th1	Th2	Th17	Treg
1i	n=	9	9	6	6
		donor
1j	n=	4
1k	n=	8
Figure 2
2b and 2d		Th1	Th2	Th17	Treg
2b	n=	2097	3397	1284	1918	FLNa MFI
2b	n=	222	660	750	951	FLNb MFI
2d	n=	1002	2405	486	560
2f		ctrl	cKO
	n=	7189	6878	FLNa MFI
	n=	5159	3139	FLNb MFI
	n=	2589	1605	Width/Length ratio
	n=	2589	1605	Area
	n=	2589	1605	Perimeter
		naive	Th2
2h and 2i	n=	1141	1137
Figure 3
3a		ctrl	cKO
	n=	9	9
Figure 4
		ctrl	cKO
4c	n=	1070	916
4d	n=	1070	916
4e	n=	1070	916
4f	n=	1070	916	Left
4f	n=	685	470	Right
4g	n=	92674	85399	Elongation
4g	n=	1070	916	Average sphericity
4h	n=	1070
4i	n=	1070
Figure 5
		PBS	OVA
		ctrl	ctrl	cKO
5a	n=	6	14	17	Histological score
5a	n=	3	14	17	PAS+ bronchi
5a	n=	3	10	15	Collagen deposition
5a	n=	30	249	275	Collagen deposition
5b	n=	6	34	33
5c	n=	5	26	28
5d	n=		19	22
5e	n=	6	32	31
5f	n=	5	25	24
5g	n=		21	27	% of CD4+ in CD45+
5g	n=		10	12	% of ST2+ in CD4+
5h	n=		20	24
5i	n=		15	14	% of IL4+
5i	n=		13	14	% of IL13+
5i	n=		9	8	% of IL5+
5j	n=		7	8
5k	n=		20	19
5l	n=		3	3
Figure 6
		ctrl	cKO
6a	n=	12	12
6b	n=	12	12
6c	n=	12	12
6d	n=	12	10
6e	n=	12	12
6f	n=	12	10
6g	n=	12	12
6k	n=	10	6
6l	n=	9	6
6m	n=	10	6
6n	n=	10	6
6o	n=	10	6	lung
6o	n=	8	4	BALF
6q	n=	16	12
6q	n=	16	12	lung
6q	n=	5	4	BALF
Figure 7
7a		ASB2⍺ WT		ASB2⍺ LA
		DMSO	PS341	DMSO	PS341
	n=	12	12	12	12
7b and 7c		P-128	P-226	P-304	P-396	P-522	P-541	P-1045	P-1459	P-1460	P-1494	P-1709	P-1989	P-2096
	n=	32	14	29	11	38	33	8	8	39	13	9	6	13
7d	n=	18
7e	n=	16
7f	n=	6
7g	n=	7
7h	n=	9
7i	n=	9
7j	n=	8
7k	n=	9
7l	n=	9
7m	n=	7
Supplementary Figure 1
		ctrl	cKO
1a	n=	6	6
1b	n=	11	14	FLNa mRNA expression
1b	n=	6	8	FLNb mRNA expression
		Naive	Th1	Th2	Th17	Treg
1c	n=	4	8	8	4	4
1d	n=		4	4	4	4
		ctrl	cKO
1f	n=	2	2	naive
1f	n=	6	6	Th1
1f	n=	8	6	Th17
		naive	6h	48h	96h
1g	n=	4	4	3	4
Supplementary Figure 2
		ctrl NS	cKO NS	ctrl stim	cKO stim
	n=	3	3	5	4
Supplementary Figure 3
		ctrl	cKO
3b	n=	9	9
3c	n=	10	10	αv integrin MFI
3c	n=	16	16	β3 integrin MFI
Supplementary Figure 4
		ctrl	cKO
4a	n=	15	13	CD45+ CD4+ Tbet+
4a	n=	6	5	CD45+ CD4+ CXCR3+
4b	n=	21	20	% Tbet+ in CD4
4b	n=	6	7	% IFNγ+ in CD4
4c	n=	12	13
Supplementary Figure 5
		DMSO	P-128	P-226	P-304	P-396	P-522	P-541	P-1045	P-1459	P-1460	P-1494	P-1709	P-1938	P-1942	P-1952	P-1989	P-2066	P-2096
5a	n=	147	9	9	9	9	9	9	7	7	9	9	8	8	9	9	17	9	8
5b	n=	32	32	23	48	30	30	31	24	16	30	24	15	24	16	16	20	16	22
Supplementary Figure 6
		DMSO	TST
6c	n=	8463	6097
6d	n=	8464	6097
6e	n=	8464	6097
6f	n=	5914	3683
6g	n=	8463	6097
